# Supplementary material for: Comparative Analysis of the Circular and Highly Asymmetrical Marseilleviridae Genomes
Source: PubMed Central journal article supplement (PMC7695187; doi:10.3390/v12111270), 2020-11-07
Supplement: viruses-12-01270-s001.pdf [file viruses-12-01270-s001.pdf]

# Supplementary material

## **Comparative Analysis of the Circular and Highly Asymmetrical *Marseilleviridae* Genomes**

**Léo Blanca**<sup>1</sup>, **Eugène Christo-Foroux**<sup>1</sup>, **Sofia Rigou**<sup>1</sup> and **Matthieu Legendre**<sup>1,\*</sup>

<sup>1</sup> Aix Marseille Univ., CNRS, IGS, Information Génomique & Structurale (UMR7256), Institut de Microbiologie de la Méditerranée (FR 3489), 13288 Marseille, France

\* Correspondence: [legendre@igs.cnrs-mrs.fr](mailto:legendre@igs.cnrs-mrs.fr)

# Table S1

Table S1. Complete marseilleviruses sequenced genomes

| Strain                          | Clade | Genome length (nt) | # ORFs | Source                                           | Reference                                                                                                                                        | GenBank Accession        |
|---------------------------------|-------|--------------------|--------|--------------------------------------------------|--------------------------------------------------------------------------------------------------------------------------------------------------|--------------------------|
| <b>Marseillevirus</b>           | A     | 368454             | 509    | Water of a cooling tower                         | (Boyer et al., 2009)<br><a href="http://dx.doi.org/10.1073/pnas.0911354106">http://dx.doi.org/10.1073/pnas.0911354106</a>                        | GU071086                 |
| <b>Lausannevirus</b>            | B     | 346754             | 461    | Drinking water treatment plant                   | (Thomas et al., 2011)<br><a href="http://dx.doi.org/10.1111/j.1462-2920.2011.02446.x">http://dx.doi.org/10.1111/j.1462-2920.2011.02446.x</a>     | HQ113105                 |
| <b>Cannes 8 virus</b>           | A     | 374041             | 510    | Water from a cooling tower                       | (Aherfi et al., 2013)<br><a href="http://dx.doi.org/10.1007/s11262-013-0965-4">http://dx.doi.org/10.1007/s11262-013-0965-4</a>                   | KF261120                 |
| <b>Insectomime virus</b>        | C     | 386631             | 731    | Internal organs of <i>Eristalis tenax</i> larvae | (Boughalmi et al., 2013)<br><a href="http://dx.doi.org/10.1159/000354560">http://dx.doi.org/10.1159/000354560</a>                                | HG428764                 |
| <b>Tunisvirus</b>               | C     | 380011             | 540    | Water from a decorative fountain                 | (Aherfi et al., 2014)<br><a href="http://dx.doi.org/10.1007/s00705-014-2023-5">http://dx.doi.org/10.1007/s00705-014-2023-5</a>                   | KF483846                 |
| <b>Brazilian marseillevirus</b> | D     | 362276             | 487    | Water sample of an urban lake                    | (Dornas et al., 2016)<br><a href="http://dx.doi.org/10.3390/v8030076">http://dx.doi.org/10.3390/v8030076</a>                                     | KT752522                 |
| <b>Melbournevirus</b>           | A     | 369360             | 505    | Muddy fresh water                                | (Doutre et al., 2014)<br><a href="http://dx.doi.org/10.1128/JVI.02414-14">http://dx.doi.org/10.1128/JVI.02414-14</a>                             | KM275475                 |
| <b>Port-miou virus</b>          | B     | 349275             | 468    | Brackish Submarine Spring                        | (Doutre et al., 2015, p.)<br><a href="http://dx.doi.org/10.1128/genomeA.01148-15">http://dx.doi.org/10.1128/genomeA.01148-15</a>                 | KT428292                 |
| <b>Tokyovirus</b>               | A     | 362593             | 491    | Water/soil sample from the Arakawa River         | (Takemura, 2016)<br><a href="https://dx.doi.org/10.1264%2Fjsme2.ME16107">https://dx.doi.org/10.1264%2Fjsme2.ME16107</a>                          | Reassembled (Dataset S1) |
| <b>Noumeavirus</b>              | B     | 376207             | 507    | Muddy sample of fresh water                      | (Fabre et al., 2017)<br><a href="http://dx.doi.org/10.1038/ncomms15087">http://dx.doi.org/10.1038/ncomms15087</a>                                | KX066233                 |
| <b>Golden marseillevirus</b>    | E     | 360610             | 543    | Golden mussels                                   | (Dos Santos et al., 2016)<br><a href="https://doi-org.insb.bib.cnrs.fr/10.1038/srep35237">https://doi-org.insb.bib.cnrs.fr/10.1038/srep35237</a> | KT835053                 |
| <b>Kurlavirus</b>               | B     | 361368             | 495    | Sewage water sample                              | (Chatterjee and Kondabagil, 2017)<br><a href="http://dx.doi.org/10.1007/s00705-017-3469-z">http://dx.doi.org/10.1007/s00705-017-3469-z</a>       | KY073338                 |
| <b>Marseillevirus shanghai</b>  | A     | 368078             | 505    | Unknown                                          | Unpublished                                                                                                                                      | MG827395                 |

**Figure S1**

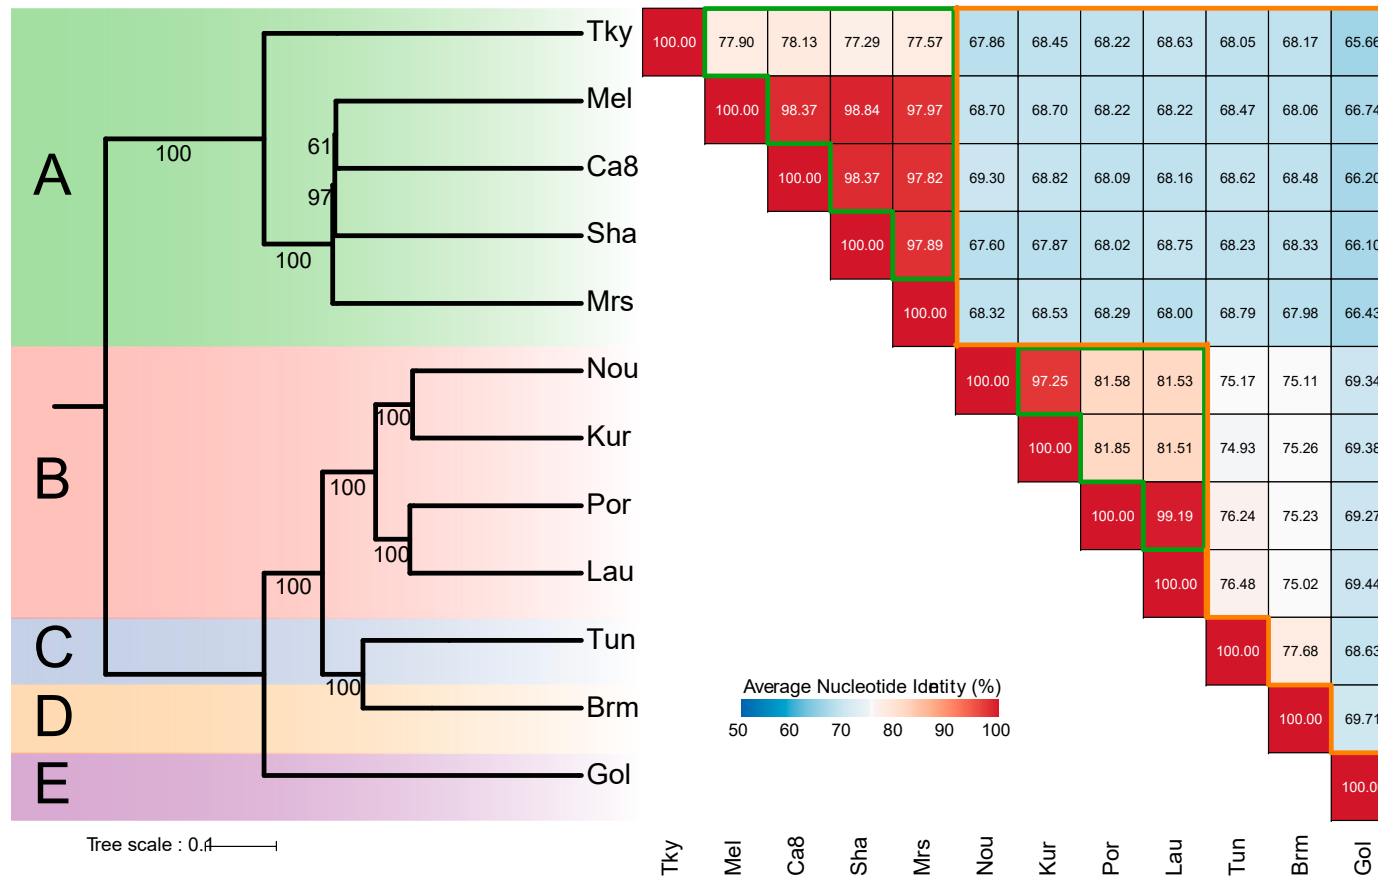

**Figure S1. Nucleotide-level genomic similarity between *Marseilleviridae*.** The matrix at the right shows the color-coded values of Average Nucleotide Identity (ANI) between pairs of marseilleviruses genomes. Values highlighted in green correspond to intra-clades comparisons while those highlighted in orange correspond to inter-clades comparisons. The phylogenetic tree on the left was computed from the concatenated alignment of single-copy orthologous core genes (see Materials and Methods). Each *Marseilleviridae* clade is labeled and color-coded with tokyovirus (Tky), melbournevirus (Mel), cannes 8 virus (Ca8), marseillevirus shangai (Sha) and marseillevirus (Mrs) in clade A (green); noumeavirus (Nou), kurlavirus (Kur), Port-miou virus (Por) and lausannevirus (Lau) in clade B (red); tunisvirus (Tun) in clade C (blue); Brazilian marseillevirus (Brm) in clade D (orange) and golden marseillevirus (Gol) in clade E (purple).

Figure S2

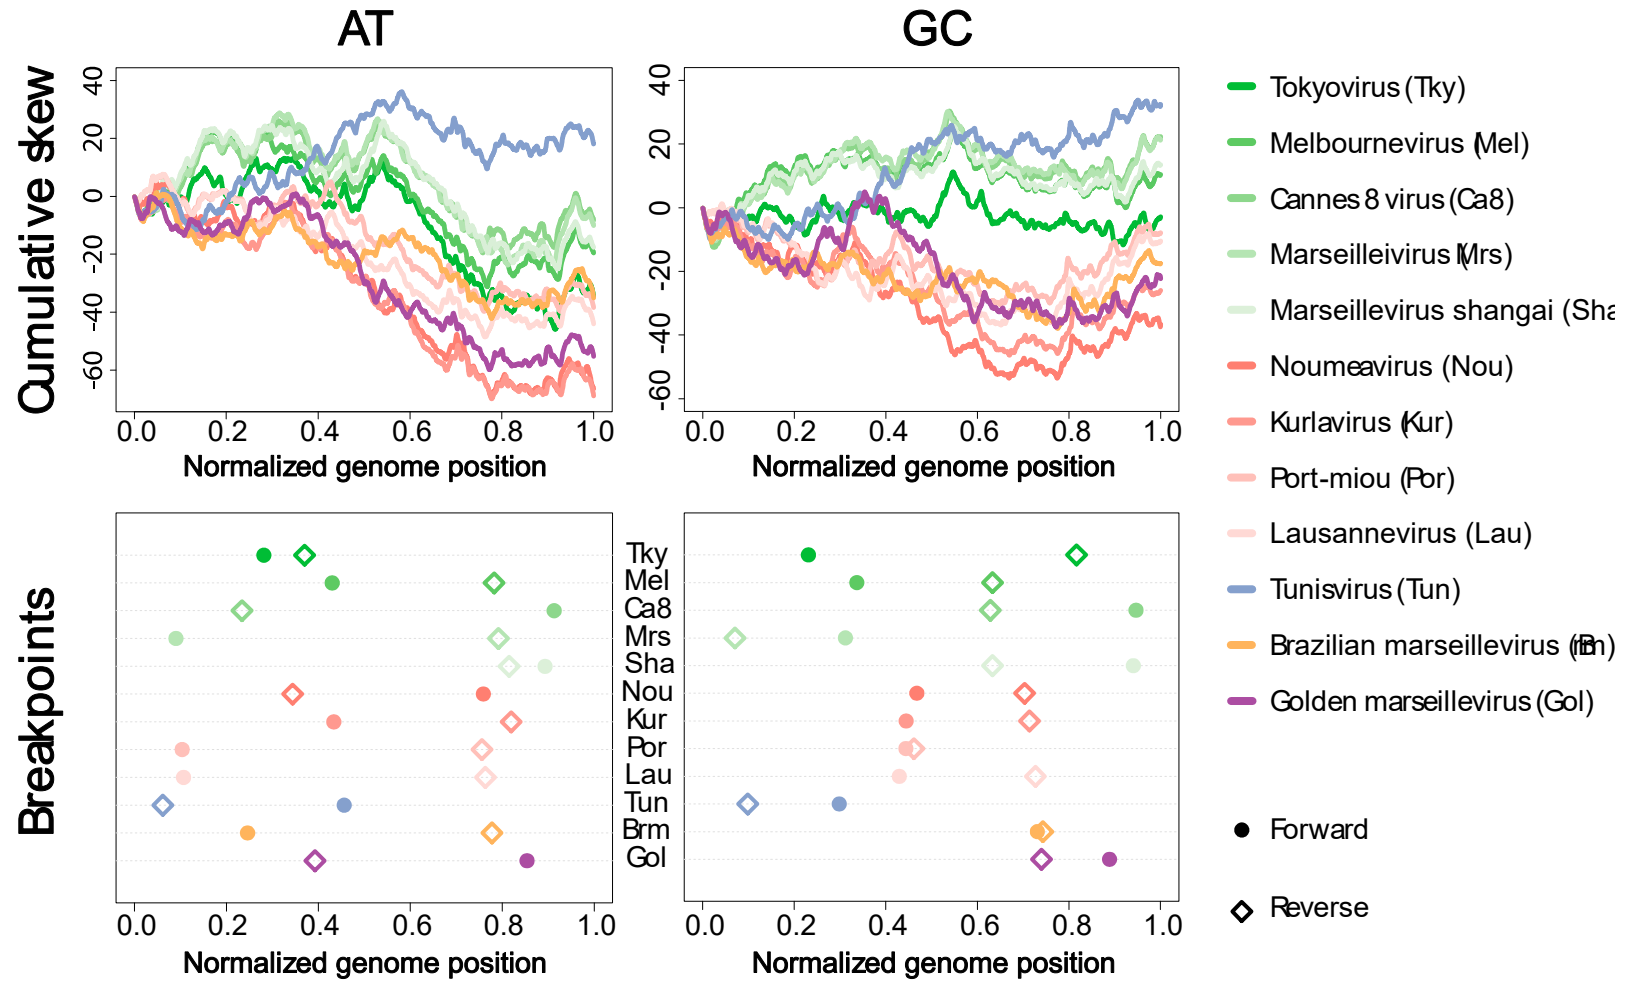

Figure S2. Identification of potential origins of replication using cumulative AT-skew and GC-skew. Each viral genome is color-coded using a similar color for viruses that belong to the same clade (A in green, B in red, C in blue, D in orange and E in purple). Breakpoints in the correlation of cumulative CDS skew and composition skews were calculated using the “rearranged.oriloc” function from the SeqinR R package (see Materials and Methods for details). Genomic positions were normalized by the length of each genome.

**Figure S3**

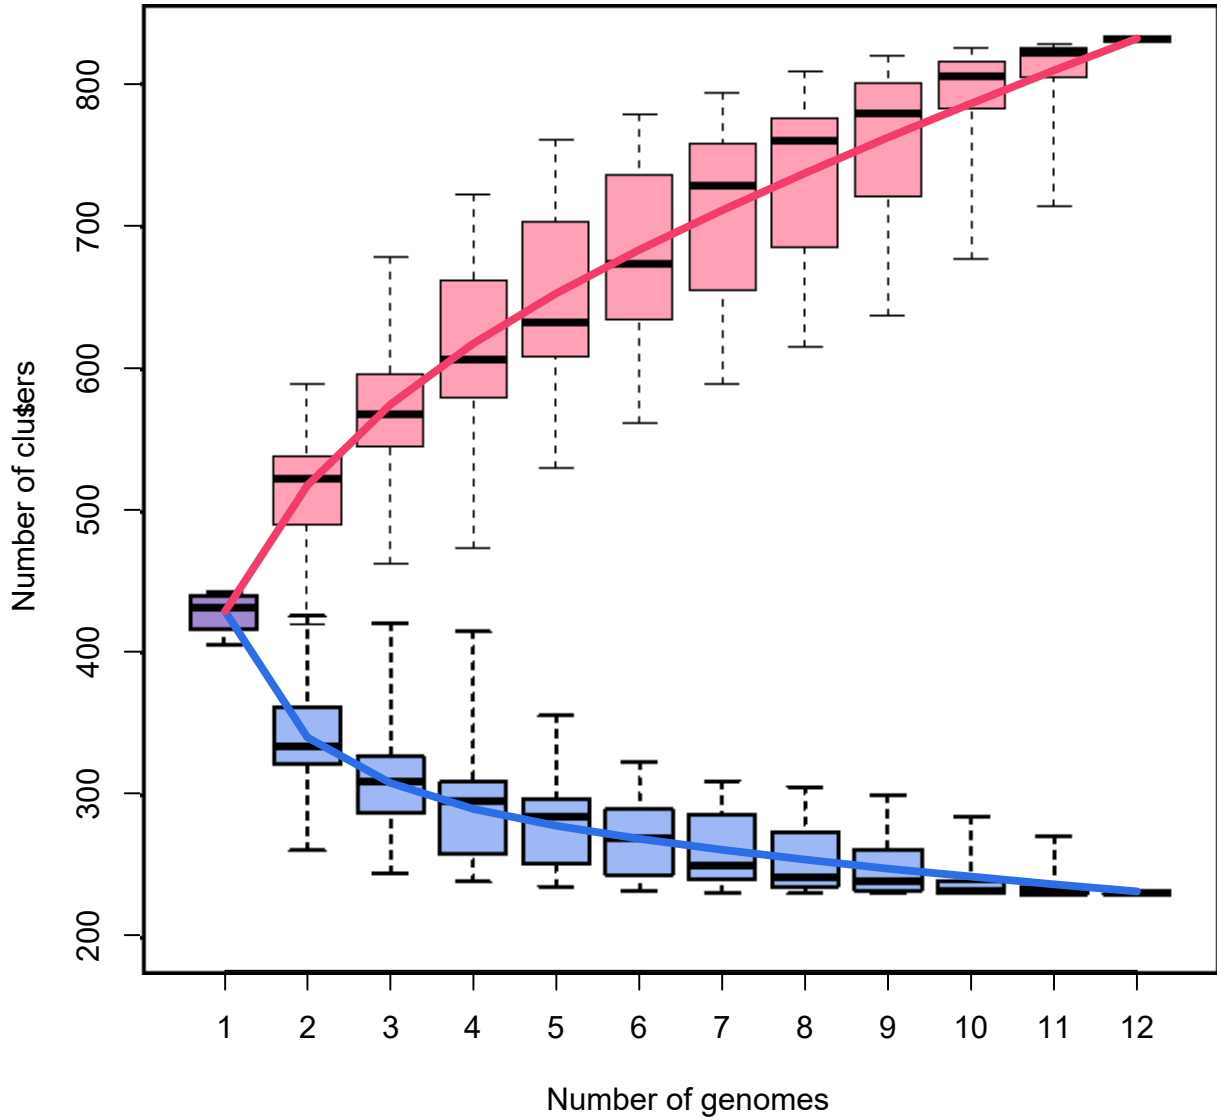

**Figure S3. Core-genome and pan-genome of the *Marseilleviridae*.** The box plots show the number of shared orthogroups (in blue) and the total number of orthogroups (in pink) as a function of the number of genomes being compared. Box plots show the median, the 25<sup>th</sup> and 75<sup>th</sup> percentiles. The whiskers correspond to the extreme data points. The curves correspond to average values.

**Figure S4**

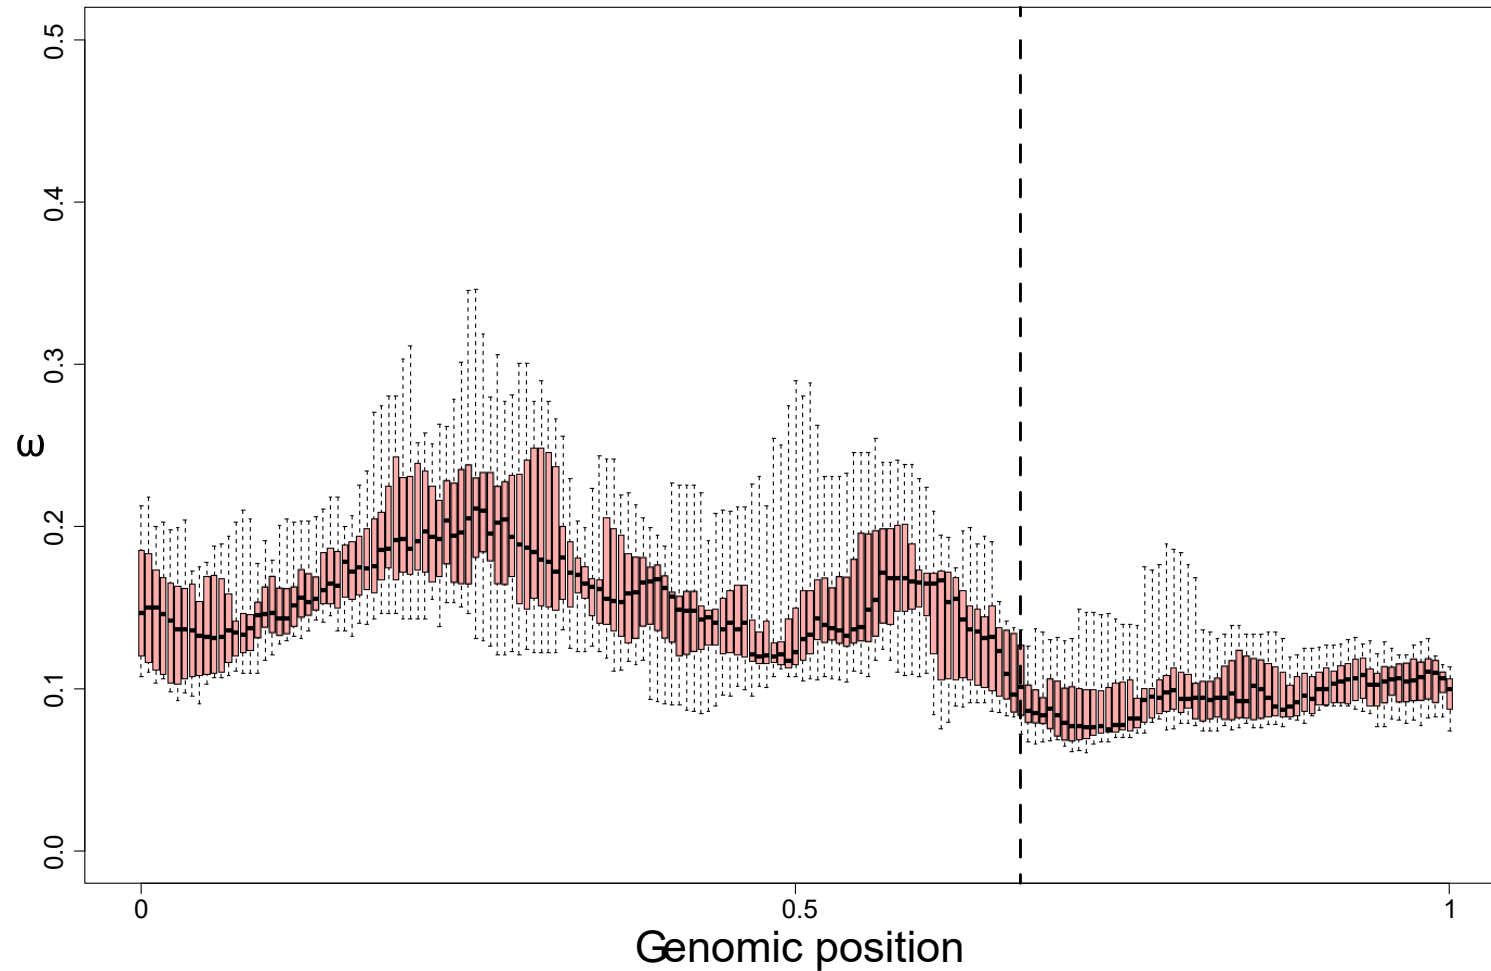

**Figure S4. Selection pressure along the *Marseilleviridae* genomes.** Omega values were calculated along the marseilleviruses genomes whose genomic positions were normalized by the length of each genome. Omega values were binned along the genome according to the relative genomic positions. Box plots show the median, the 25<sup>th</sup> and 75<sup>th</sup> percentiles. The whiskers correspond to the extreme data points. The dashed line separates the core region from the rest of the genome.

## Figure S5

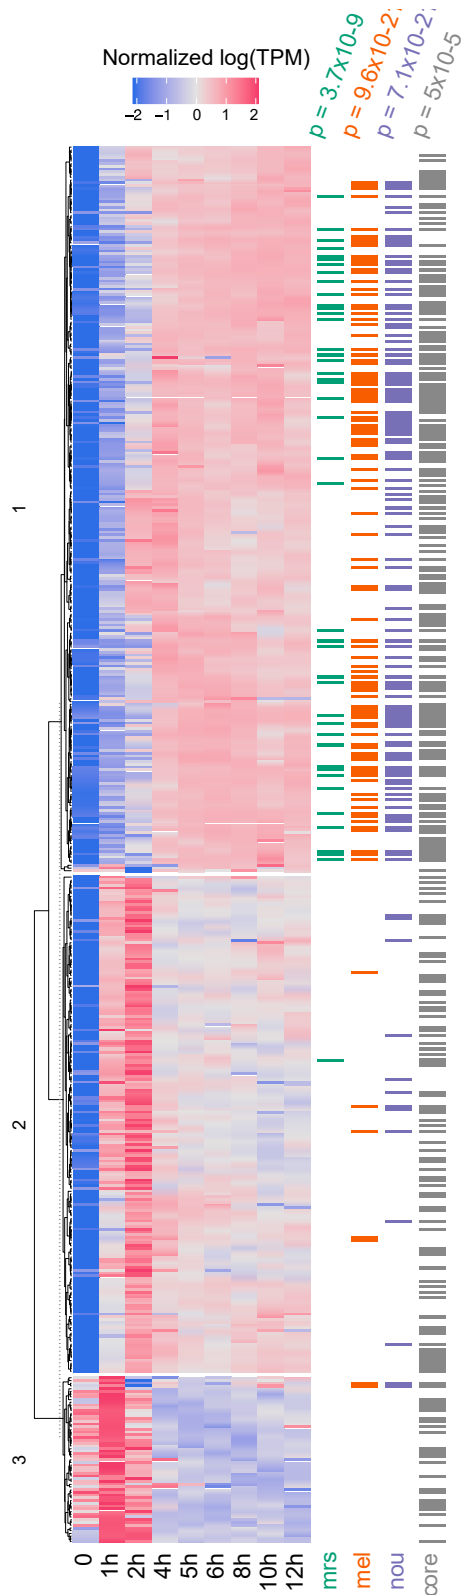

### Figure S5. RNA-seq marseillevirus gene expression.

RNA-seq data was generated by [1]. The left part of the figure shows the heatmap of marseillevirus gene expression profiles along a replication cycle. Rows correspond to genes and columns to infection time points in hours (0 h corresponds to 30 min of infection due to virus adsorption period, see [1] for details). Expression data in TPM values were normalized and scaled (see Materials and Methods for details). The clustering was done using a spearman correlation distance and separated in 3 main clusters using kmeans. Genes whose protein products were identified in marseillevirus (mrs in green) [2], melbournevirus (mel in orange) [3] and noumeavirus (nou in blue) [3] are shown at the right of the figure. For the proteomic datasets of noumeavirus and melbournevirus virion particles we displayed the orthologous marseillevirus genes. The gray column represents the core genes. The p-values on the top were calculated using a chi-square test based on the counts among the three clusters.

1. Rodrigues, R.A.L.; Louazani, A.C.; Picorelli, A.; Oliveira, G.P.; Lobo, F.P.; Colson, P.; La Scola, B.; Abrahão, J.S. Analysis of a Marseillevirus Transcriptome Reveals Temporal Gene Expression Profile and Host Transcriptional Shift. *Front Microbiol* **2020**, *11*, 651, doi:10.3389/fmicb.2020.00651.
2. Boyer, M.; Yutin, N.; Pagnier, I.; Barrassi, L.; Fournous, G.; Espinosa, L.; Robert, C.; Azza, S.; Sun, S.; Rossmann, M.G.; et al. Giant Marseillevirus highlights the role of amoebae as a melting pot in emergence of chimeric microorganisms. *Proc. Natl. Acad. Sci. U.S.A.* **2009**, *106*, 21848–21853, doi:10.1073/pnas.0911354106.
3. Fabre, E.; Jeudy, S.; Santini, S.; Legendre, M.; Trauchessec, M.; Couté, Y.; Claverie, J.-M.; Abergel, C. Noumeavirus replication relies on a transient remote control of the host nucleus. *Nat Commun* **2017**, *8*, 15087, doi:10.1038/ncomms15087.

# Computer code

## Python code used for cumulative GC-skew and AT-skew calculations

```
#!/bin/python

import sys
import numpy as np
import argparse
import os
parser = argparse.ArgumentParser(formatter_class=argparse.ArgumentDefaultsHelpFormatter)

parser.add_argument('-f', action="store", dest="in_path", default= None, help="Genome file
(.fasta) [REQUIRED]")

args = parser.parse_args()

if args.in_path is None:
    print("Genome file (.fasta) [REQUIRED]")
    exit()

fullinputpath = os.path.abspath(args.in_path)
output_prefix = os.path.split(fullinputpath)[1]
output_prefix = os.path.splitext(output_prefix)[0]

'''Opening Fasta'''
fasta = open(fullinputpath, "r")
fasta.readline() #get rid of header
sequence = fasta.read().replace("\n","") #removes \n for counting

'''init'''
compteur_A = 0
compteur_T = 0
compteur_G = 0
compteur_C = 0
boucle_A = 0
boucle_T = 0
boucle_G = 0
boucle_C = 0
GCskew = []
ATskew = []
AGskew = []
ACskew = []
TGskew = []
TCskew = []
calculGC = 0
calculAT = 0
calculAG = 0
calculAC = 0
calculTG = 0
calculTC = 0
pas = 100 #step size
window=1000 #window size of N nucleotides
taille = int((len(sequence)/pas)+1)
cumul=np.empty((taille, 4))

'''Boucle'''
for start in range(0,len(sequence),pas): #browse the genome
    end=start+window
    if end > len(sequence):
        end = len(sequence)
    for i in range(start,end): #count in groups of N nucleotides
        if sequence[i]=="A" :
            boucle_A+=1
        if sequence[i]=="T" :
            boucle_T+=1
        if sequence[i]=="G":
```



```

        boucle_G+=1
        if sequence[i]=="C":
            boucle_C+=1
if boucle_A==0 :
    boucle_A=0.1
if boucle_T==0 :
    boucle_T=0.1
if boucle_C==0 :
    boucle_C=0.1
if boucle_G==0 :
    boucle_G=0.1
#cumulative GC and ATskews
calculGC += ((float(boucle_G)-float(boucle_C))/(float(boucle_G)+float(boucle_C)))
calculAT += ((float(boucle_A)-float(boucle_T))/(float(boucle_A)+float(boucle_T)))
GCskew.append(calculGC)
ATskew.append(calculAT)

boucle_A = 0                #set to 0
boucle_T = 0
boucle_G = 0
boucle_C = 0

''' Write & Close - Files'''
fasta.close()
np.savetxt("{}_GCskewscore.csv".format(output_prefix), GCskew, delimiter=",",fmt='%f')
np.savetxt("{}_ATskewscore.csv".format(output_prefix), ATskew, delimiter=",",fmt='%f')
print("Done!\n2 files have been generated : XXskewscore.csv\nThanks for using this script")

'''Check the generated files on R'''

```

# Dataset S1

## Reassembled nucleotide genome sequence of tokyovirus (fasta file)

>tky

```
ATGACTTCTGTATCTGTGGCACCCTCGTAACGCTGCTCCGGTTTTGTGGATTTGGCGACTTCTCCGATTTGGAGGC
CTACCTCTATGGTGGTTGTTCTGCCGCTCACTTATTTTGTGCGTGCCATCAAAAAGGCTAATGGTTCTCTTCCCTCCCG
TCGTTCTCCGCAACATCTCGGGTCTTCCCGTTTTCGGCTCAGAGTTTTCCGCTCTGTGAATCGTTCTGGCGATTACGTC
CTCAACACTTGGCTGCGCGTGTGCTGCCCCATCGCCATCCGCCCGCAATGCTGGTGGCGCCATCAACGCTAACGC
CACTATCCGATGGACAGGAACCTTATGACAACTTGTGAGAAAGTCAACATCACTTCAATGACCTCATCGTCCACG
AGTTTGACAGCTATTGGTTGACTTCAACTCCAGTTCAACATCGACGCTTCCAAGCGCGTGGTTACAGGAACATGATT
GGAGATATTTCCCGCATGATTAATCCCGTGACGACTGGCAACCCCTCGGAACCGGTGAGTTCTTCAATCTTCCATTCC
TCTCTTCTACACCGAAGATTCCGGTCTCGCTCTTGTGTGTCTGCTCTTCTTTCAACGACATCAAGATCAACTACTGCC
TTCCGAGGTGGCAAGACTGATTGCTTCAACGTGGGTGTGCGTGCCAATCCTCCACGTTTGACGACATGTCCAGGTT
TCTTACGATGCCGCTTCTACTCTCATCTACAGCTCAAACGCTCCCGCATCACCAACGTCGAGACTTGGTGCCACTACGC
CGTTGTGCACAATGACGAGCGTGTCAAGATGGTAAGAAATCCCGTATGATGGTCAATCAAGCAGGTGCAAAAGGTCAACG
AGACGACCATCAACCTTTCGAGCTCAACGCTCTTGTCCCATCGACATCCGCGTGTGCGATGCCGTTGTGCGTTACTTC
TACGCCATCAGGAACAGCTCCACCCCTGGCGAATGGTCCAATTACACCACCGACCCGCTATGCTGGTCTTGACCCGCT
CGAGGTGCCAGCTTGTGTACGAGTCCACCGCCGTTGTGAGCAACGCTGATTATTACAGCCTCATGGTGCCGTTGGT
TCTGGCACAATCCATCCCGAAGAGACCGGCTACCAGCGTACTCTACTCTCTCGACAGTTCTGCTTCTGACCCCAAG
GGTTCGACAATTAATCCAAAGCTCAACATGTGTGAAACAGTATGCTCCCTCAGTGTGCTGTCAACGCTCTGTGCTGTG
TGTGACCAACACCGCATTCGATTCCTTCTGTGTACCAACCCCTGCCGTTCTCAGCAGAACAGACCTTCCAGCACATCT
TCCGAGTTTTGAATTTTAAAGTATGCGTTTGTGCGGAGGAAGCTTGGGCTTCCAGTATTGTAGGATGTAGTCTTCA
GTCCCTCGCCCATGCACTTATCCACAAAAAATATTTTATGTTTTCACTCAAAACATAACTATTTGCTGAGAGACTCTG
CCCTCTTTTTGTAGGAACATTCCTGCTCCTTTCCAGCTTTTGTATTCGCGTGCACTGACTTCTGCTTCTTTTCCA
CAAGAACAAACATATTTTGTGGAGTTTTGTATTTTGTGTAAGGCCAATATATTACAGCCTTACTCATAAAAAGATC
CCTCACCTTGTCTTCTTGAAGAGTTTTGTCTCTTTTGTCTCTTTTGGGACATCCCTGTAGTTCTTTTTGAGAA
GGTCCCGCAATAAAACCTTGTGTGTTTTTCCGCAATCACAAGAACAAAGACTTTTTGTGCAAGGGCGGAATGTTCTTTC
GTTTTGAGAAAGTTTTCAACTCGTTTGGCAGAAAAAGCTTTTTTCCGCAACGAGTATTCTTCCAGAAAAAGATATGATT
TTCCGCAAAATGACATCAGAGCTTGTGAGAATACAGCTCATGCATAACGGCTTCTTTTGAATTTTTTATTTTGTGCG
TTATTTCCCTCCCGCAAAATGCGCAACAGAAAGTTATCTGTCCCTCAACATCAACGATAAGGTGCTGAAACTCTGCG
ATGACTATAATACAGTACTTTTATTTGTTAAAAGGTAATTTTACTCTGGGAAAATTTTCTTCAAGAGCTCCCATTTT
CTCCATAAATCCGAATTTCTGTGCGTATCCCGCTCTTTGACGCTCTGATTTTTAGCAAAAGTTTTCTTTCTGTATG
GTCATTGTCCACTCTGACTTAACCTCAATAATCTATTTTCTTCTCGATGTAATAATCAGGAAAGTATCTGCTGTTTGT
TCCTTTGTGCGGTGATGATACGAGCAATTTTTTGTGCGGTCTGTGTAATTTGTTCTTCTGTATAACCTTCTTTTTTCCA
GGAGTCCCTCAGCAAAAAGTTCTGATCCCTTGACAAATCCAAACATCCCGATGGATCACAATTCCTTTTTTCTG
TAGCAACTTTTCTGATTTTTTCTGTACCTCCGCTTTTGTGACGATTTCTGACTCCATACATCTTCAATGCAAGTTTCT
TTCTCTTCTGGAATCGGAACACTCGGAACATCTCTTCTTGTGCAAAATTTTGTAGCAGGCGGAAAATATGTTGTTCT
CGAACTCACACGAACAAATATCTTGTGAGCAGAGTATCTGTCCCTGATTTCCGTTTCTGCTGTGAGAACGCAACCT
TCTTGTTTTTATAACTTCCCTCCACTTTTTTCCACGGTACTCGTTCTCTTTTTTGTGACATTTCTGCGCAACCCCAAT
TTCTCCCATATTTCCAAGACGAACAAATCCCTCTTCTCGCATGCGCAAAACATAGAGGATGTCTTGTGTTTCCCTTGT
ACTCACTTTGTTCCAAACAAATCTCACATCTTTTCTTGTGAACTTGTGACTATCTCATCCCAAGGTTTTCTTTTCTTCT
TCTTGTGAGACATTTATGCAATTAACCTTTCTTCTTGGCGCTCGGACAAAAGTTGTTCCATTTGACCGTTGTTTCTG
TCCTCCCTTGCAATACACTCTCAAAGGAGAAAAGACACCTTGGTATTTGAGAAAGGACCCGAAAGCTCAAACGTAAG
ACTCAAAAATTTCTTCTTCTTCTGATGCTGAAATTTCCCTCTCGACAAATATTTCTTCTTCTGCTTAGGTTTTACCTT
CTTTTTGACTTGGCATGCGAGCAGTTGCCATCACGCAATTTCTACAAAATGGCAAAACAAGGAAGTTTCTTCCCTTCTT
TACCGTCTCTTTTTGGCAGCTTTCGAGGCAACTTCCAAGGCTTCAAAACAAAGAAATTTGCTGAGACATTTATCCA
TAAAATATTTAGAGAAATATTTTTAGTTGTCTCATGGAAGTTTCACTTTCCCATCGCAAGAAATTTCCGCTTCAAGACT
TTGTATGGATGGTTTTTACCATCCAAGTTATAGGGATAACCGTCTTCTGCTTGAATCCAACAGTATTCGACGCCAAATTT
TGGGATAGAACACCACCTCTTCTCCGATGCTTCTTCCGCTTCTGATGCTCGATAAAAATGCTTTGGGTGAAAGGT
CAAACTTTTTGTGAGTTTCTCAAATGCCTTGTGTTGTTTATTTTGTGAAATAAAATGAAAGTTTGTGTTTACT
CTTGTGCTCTTCTGATAACCTCCAGAGGTTCTTGAAGATTGGAGTTTTCATAATCCTTGACATGTTGAGAAAGAGACTT
TTCCAACTATTTTGTCTTCCAAACGCTCTTCTGAAGGATACGGAGAACAGAAATCCCATTTTGTAGCTTGTCTTCTC
CTTGTATCTATCTGATTTCTGCTGTTCTTCTGCGCACTTCCAATGGAGACTTGTTCGTAATGCTGCCTTCCGTCGAGTT
CTATAATAGTTTTTGTAGCAGCAAAAGTCAAAGGAGAAAAGTGTCTTTTTCTGGATTTTACACCACGAAACTTTGAAAT
TGATGAATGGGTCTTCAAGTGTCTTCAAGAAAGGGGAAAGAGCTTCTGCTCGGTTTTATTTTTACAAACAGGGCACCA
ATAACCGTACGAAACATTCGAAAGTGCAGGAGAAAATTCGTGACGTTTTTCAACAAGGAAAGAAATTTTTTGGCTGAGT
TTTTGAAGACTTCTTGGACTTTTTTGTTTTTTGGCGCACCAAAAAACTATTTTTTGGTGGCAAGCGAAGCTGTTTCCA
AAACAGCTCCACAGTCAAAAAAGAACAGAGTTTTTGTTTTTGAAACAAAAGGGCAAAATTTTCTTTGGAGACATCGTA
AAGCCTCATCTGAAACTATGTTTGCATTTTTCGACACTCAAACCAAACTTTTTATTTGAATTTCTCGAACCTCCCTCG
GACTCTGTTTATTTCTTTCGACGCTCAAAATTTGGCCTTGTGGAAGAAAGCAAACTTTTCAAAGCATGTTTTGCAT
TCATCCGAAGCAAAATTTTTACTAGAACAGAAAGGGCAAAAAGTCCCTTTGAGACATGGCTTAAACTCGCTTCGAA
ACTATGTTTGCACTTTTCTGCATTCGAAACCAAACTTTTTTGAATTTGCGCGCACTTCCCTCGCTTTTTTTTTTCTT
TGTGACACACCAAAATGCGGAGTTTTTGTGGGACGCGAAGCTTTTTTAAAACATATGTCGCACTCATCGGAGCAACAA
AGTTTTCCAATTTACTACAAATATGACAGAAATGGCCAGAGCAAGAAATATGGCCAGGTTGCTTTCAAAGAGTGGCCGCA
TTCCCAACAAATAAAAGAAAATTTTTGTGACTTCTTCTCGAATCAACAAGGATTTCTCTGCTTCCGCTTCCGCAAAAT
TTGCTTGTGCGACAGGCAAGCTTCTGTTCAAAAACAGGCTTGCATTTCTCCCTTCCACAAAGTTTTTCCCTTGTCCGA
GTTTTGCGAGTTTCAAGTTTTCTTCTAAATTTCAAGCAAGTTCTTCCATTTTCAAATAATAAAAAGTTTTTATAT
TTTATTTCCGAAACAGCCCTCTCAAATTTCCGAAACTTCTCCGGGTTGCTCCGTTGCTCATCAAAGTTTTGACAT
TCCTTGTCTTCCGCGATCGTCCGCTGCAAGAGCCGAAGTCAAATATTTTCTTTTGGTATCTTTTCAAAGTTTTTCC
```

CAGAGATTCAACATCCCCTTCTCGAACGACACGATGAGAAGATACCCCTTTGTTCATAGTCAGGGTTTACAATCTCAATGT  
ACTCTACAGCTTCTCTCTGTTGGCCATGAAGATATTCTGACACGAAATTTTTCTCTGGATAAAGATGACCGTCTAACCAC  
GAAATGTAAGAAGACAAGAATTTTCTGGGCATTTTACGGAATAAATGCCACGGTCTTTCTTTTTTCGATGTGCTAAAA  
TCGCACGCATTCGGATCTCTCCGAATGAAATATAAATCATGAATCCTGAAAACCTTCAGGTTACCTGCAAAAATTTGGT  
GAAACAAAGCACCATTCCGAATGTTCCATAACCTTCCAACTTGGCGAGACTGTATGAGCAAAACAAAATGACCCGGATT  
GAGCCTTGAAGAGAGGATGGAAATTAAGAGGATGGTGTCCGAGTTGAGAAATACCTGAAAGTTTCCCTTCCCCTTTGTTT  
AGGGGCCACGTACCTCGTCAACAGCACATCTAAAAATACCGCGTTTTTCTTTCCACACAAAGAAAAAGTTTTATAAA  
ACTGAACAAAAATTTGGGACTTTTCATCTTTGAAAAATGTTCAACATGTCCGACAAGAAAAAGGCAAGAAAAAGAGAGGC  
GCAAGATGGCGAAAAAATTTGGCTTTGTTTGCAGCTCTCGGAACCTGCGGGTTTGGTTTTCTCTCTCCTCGCGAGAG  
AAAAAGGTTGACAAATATCTCTAGATGTCCGCAAAAGGTTGCTAAAGTCCCCCAAGGCAGATTCTATGTACCTTGTCCA  
CGCCCTCGCGAGAGTTCCCGATCCGCGCTCGTACGTTGGAACTTTTGTCTATTCCCTGTGCGAGGAGGACCAGATTATG  
ACCAAAGGGAAGGAAATCTTGGGATCTCCAAACAGGGAAGACCTTCAGCACAAAGTATAAACCCTCTCTTCAAACG  
GACAACTCAAATACTGACTGGAACTGGAAAGAACGAAACCCCTCTCGATAAAATCCCTGATGAGCTCGAAGAGGAAATTTCCAGG  
ACGTAAGAGGTTGAAAGTCAAGAAAGAACCCGAGCCAGTATACTTTTGCCTAAAGAACCTCTCGCATCTGACAAATCCCA  
ACGTTCTCGCGAGAGCATTGCAAAACAAGAAATGGCTTATGACAAGGTTGCGCTAGCGAGTTGCGCCTCTTCGTCGGT  
GTGGGATGCTTCTCTGTTGCTTTCTAAACATTTTGAATAAAATGTTTTCATCTTATATTGAACGAGCAGAATCTCAT  
TTTTGACCCGTAACAAATAAATTTTAACTTCCAGACAGAACCCACATCTTGTGCTAAAAATTCCTTCTTATTTTTACC  
CACAAAATGTTCCATACAATCACCGTAAAGTGCAGGAAAGTGAACACAAGTTTACAGGAAACGACGAGTTGACACCCCA  
GTCCAAAGCAGAGGCTTTCTCTCAAAGGCAAGGCTATGTCCCGTACTTGAAGAGTTTGGCGAGTACATCAAAC  
TCGTCATCTTTCAAAGGCGGTGCTCACCAGAAGTAAATGCTATGAACACCTCGACGGAACAGACATCACTCCAAA  
TTTTGAGGACTGGGAGTTTGTCTCGTCCAGATGACCTATCCATCTGTTTGAACCTTGAACAGTCAATATTCTACAT  
GGCGTTCGAAGAATTTGGAAGGCTCTCGACGAAATTTACGTTCTTCCGAAAGAGTGCATGAACAGCTCAGAGGACCTTC  
TCGACAGATCTCTCTCTTTGACAAAGATTTTTCTTTGACGCTTCCCAGAAAGCATAAGAGAAAAAGATAAGGTTGTCTC  
CTCGAAAAGCTCTCGGACTGTCTTGGAACTCAGGACATTCAGCGCGAAACATCTGTATGGAAGCAAGAACTCT  
CAAACCTCATCGACTTTGAGTACGTAGAGTTTTTGTGAAAGTGTTTTTATTCTTTGATAAAAACAAAAAAGAGCTTTTGT  
GGTTCTTTTATAGGAAAGACTTCAATTTAAGATAACGAGCAGAACAAAGAGCAAAAGCTTTTTTATTTTGTTCAAAATGA  
CGAGCAAACTCCTCCTCACATTTACGCTCTTCTTCTGATGAGTTCCTTCTCGAAAAAGACGAAGTCTGTTGTTCTTTG  
AAGGATATACAATGACCTTAAATATACCGCCTCACGAAGGAAAGCGACCATCAGCGTTTCCGTAACGTTTGGCGGAAGA  
ACGAATATGCAGGTGGTACGAACGGAATCTCTCGAAAAACATACTTTGGGAGCGGAGGTTTTTGAAGTACCTTCTG  
TAGCAAAAGGAGTTGACTTTGTGAGATCCAGTGCAGACAAACATCGCCGTTCCGGAATCTCTGGTCCAAAAGCACAAG  
AAATCTTTGAAGAGAAGGAAGAACTTCTCGCAAGATTAACGCTCAAGCAGAAGATAGAGAGTTCAAGTACGTTCC  
GGAAACGCGAGGCGCCTCAAAGCGCAACCAACACTTTGAATCACTGACAGAATAAATATATATTTTTTGAATATATAAA  
CCACAACCTCAAAGATATCTTTTCGAGAAGACTTTTTCTTGTGCGTCCGCTTTTTCTTCAAGGAAAGAGGCTTCTG  
TATCGCAAGAGTTTTCTTTGCGTCTAAATATTTCTAGAGAATAATTTCTACCAAAACAAATCTTCTGCATTTGCCCTCT  
ACGTCACCGCCTGACATTTTCCCTCATGCAAAAAAGTCTTCTTACGTTCCCTTCTCTGTCGTAACCTGGCAAATTTCCG  
AATTTTTCCCGTTTTGAAGTTTTTCTCATGACAACTTCTTCCACTCTTTTCGTAGACGACTTGTTTTTCTCTCGCTCACGA  
CAATACCGTCTGGACGGTACTCCTTTGTGAGAAATCTTTCCCTTCTTCCACTCTGCTCGTGCAGAGAGCTCCATCG  
ATTGTCACGAAAAATCCCTTCTCTTCTCCCGTGTCTATAGAAGAGTCTTGTTTTTCTCTCTTGTGGCGCTTTTGA  
GAGTTTGTTCGACACAGAAAAATCTGTTTTTCAAGAGCAGAAACGCAAGTCTTTGGTCTTTGACCATGTGCACTCC  
AAGAGGATTCGTTGTCTTTTGGACATTTGCTCTCGTTCATTTCAAATTTTCAAGATTTCTCCACCGAAAAATCTCTTCT  
TTGGCGAAAGCTTTTACATTTCTGACATCTCAATGGGCTCCATCATCAAAGTCAAGCAGAGGGGAAGATTGCGATCTT  
CCGCGAAAGGACGATGTGACGCGCAGTGAACCTGGACGCGTGGGTGGAACGTAAGAGTTTGTCTGTCGCTCCCGAAG  
AAAGGTGCGGAAATATCTCAAATTTGAGAAATGACGAGGAGTACGCGGAGAAAGTCCCTCGAGGTAGAATTTTACCAACT  
CTGGAAGGACAGGCTGACTCCGAAGCTTTGAGATACTGAGATTTTTTCTCTTTAGCGTCAATATGCGGAAACAGG  
GTTGTTGTTGTTCAACAAGTTTTTATACATCGCGGTGCAAAAGATTTGAAAGTCTCTCGAAGAGATTTACGTTCTTCTC  
CCGAATGTATGAACTCGTCTGAAACGATGAGAAAAACAAGCTTGTTTTCGACAGAACGTTCCCTTCAAAGAAATTTCCG  
GAAAACTGAGAGAAAGTGTGAGAAAACTCATCGAGCGCTTTTCAAGGCTTGCCTGGAACATCAGGATTTTACGCGAGG  
GAACGTTCTGACGAAAGCAGGAGGACAACTAAAGTGTATCGACTTTGAGTGCCTGCGCATCAACAACAGAAATTTGAA  
GAGCGGCCATTTTTCTCATCCATATTTTTTGTGGATGAAAACAGCAAAAATATTCATAAAGAGAAATTTTTATTTCTTG  
GTGTGTTTACGTTTTCTCGAATGTGAGTCTTCCGATGTCCAAACAAAATGTTTCTCCGTTCTGTCTTGTCTGCTTCCAA  
ACATCTTTCTGAAAAATCTCTCTTCCCTTGGAGCATTTCGACTTTTTCTTTCACTCCAAAAATGCAAGCCACAAAGCA  
GTTGTTTACCCCTTTCCGAAGATGGCAGAGTCCGCCACAAAAAGTGAAGAGATGGCAGGAATGCGACTTTGTGGGAAAC  
TCTGCCATCAAAAAAGATTTGTAAGATATGCGACGGAGCAAAAGCAGGAAACAGACACCTTCAACCGGAAGGATA  
AATGTTTTGACTCCATACGCTGACGGAAGAGACATGGA AAAACAAAAGGATTTGGTTCAAGAACGGAATGCTTGCATCTTT  
CACTCACTAGTCAAGGAAGAGAACCGGCATCCACAAAATTTTTCAAGGAGCAGGAAAGAACAGCCTGGGAGTTGAGGT  
ATGTCTGCGGAAAAGTCTTTGACGAAGAGACTTTCTGACCTTTGGAGACGGAAGAAAGAAACAAGAGCAAAAGTGAAGTA  
TAAATTTTTAAAACAAAATTTTTAAGAAAGATGCTTTCTGTGTTTTTGTGGAAGTTGGGTCAGAAATCCAAAAGTG  
TCAAACGAGCAGGTTTTTGTGGGAAAGACTGCAACCAAAAAGGAAATTTTTGACAGACACAGGACTTCCGAAGCGCTC  
CTACTTGGTGAACAGGTTCTCTCGACTAAATTTTTCAAAGATAAAAATATTTTACTAAATGTTTGTGTTTTGGCTTG  
GCACCTCCCAAAAGAACGGAATGCAATTCGAGAAAGCCCAACATCCGCGAGGTGATGTCATGGTTTTGTTTTGGGGAAC  
CTTTCTTCAAAGGATTTGACAACTGTTTCTGTTCTTATCGTGGAGAAACACTCAAGGAGAAATTTCTCGATGCTGCGCA  
ACGCGTTCTCCAAAATAAATTTGAAAGAACTCAAGCTGTTCCGACCGTGTGACATTTGAGGTTTTGCTGTTTTCTCC  
CAGAGAGTTATAAAATTTCTTTTATATAAATTTTTTATATAATTTTCTTCAAGGAGTCAAACACCTTATTCC  
TTTGGCTGCACAGCGCGCGGAAACATCTTTGTTTTATCGAAGAACTTTTGTCTTCCGTTCTTAAAAATAGCATGA  
AACTGCTGTTTTGTTGCTGACTTTGGAAATTTCCCAAAAAGTCTCAAAGGCAAACTTCTGTTTT  
CCGGAACAGAGCAAGTCTTTGCTTTTGGGAGACATTTGAAATCTTGGTTCGAAAAACTATAGCAAGTTCTTGTGCTG  
GTGTTTCAAGTCTGTTTTGATTTGATTTCTGTTGTCAGGAAACCAAGTACTATGAGAGCACAGATAGAAGAGACGG

ATGAAAGACTTTGGGAGCTGAGCAAAAGCCATTGCAACATCAAATTCCTCCAAAACCTTTCGTTGCGACTACAAGGGCGTT  
CTCTTTGTGGGAGCGACGCTTTGGTCAAACGTTCCGGACGACGCTGACGAACTTATGAACGACTATCTCGAAATTCCTGA  
AATTTCCCCAGAGCTTATTCGGCAAAAGTGGAAACAACCCGCGTCTTTTATTCTCAGGGAAGTGGCAAAGGGGAAGA  
CCGTGTGTTCTACACATCATTTGCCCTCTCGACGAAGACGGAGCCCTTGGAACTAAAAGCGAGTATCGAGAGTGTATTGC  
TCCAACCTCGGATTTTTGGCGAAAGAGAACGTTCTGCTTGGTTCTGGGGCACACACCGTTCCGTTTCCAGAAAAAG  
AGGAAGTACAGTCTTTGCCAGCAACCCGAAAGGATACACGAGAGAGGAAGTGGGGTGGAAAGCAAAATTTCTTTGTGGATA  
TCTAAATATTTTTAGTCAAAAAATATGCAAAGCTTTTTGAGCAAGAGAGAAAACCTTGATGTTCTACCTCTCGGAGAGA  
GAATCCCTGGAAACATTGAGGAGAAATTTCTCATAAAAGGCAAGCGTTACCTGACACAACCTCCAGATTTTTCGATT  
TGGTTGTATTGCTGATGGGAGACTTTCATGGAGAGAAAGAGATTGCTCTGGACTTGTAGAACTGGAACAAGGGGT  
CATTTCCGTTCTTCCAGTTGACGACCCAGCTCTTTCGAGTCTTTTCGATCTCTTTGCGAGCTTGGATTTTCTGAA  
CATCTTTTTGCTATCCACAGATTTGCTGGTTCTCTGACCTAGAAAAGAAATATTTTTCCCTCGTGGGTGAGAAATTT  
TCCCTTTTCTACCCATCTCAAGAAACAGTTCTTTCTTGGAGTGTGACCTCTGCTCTTTTTGCGAATCTCTTGTTCG  
TATAGGGCGATAAAATCTTGGAGTTCTGTTGATCTTTTTCGACTTATCGAAAAGAGAGGTTTGGCCCTATTT  
TCTTTTGTGGGAAATGGGAATTAAGACCTGAATAAACTTTTGAAGGAAGAGTGCCTGCTTGTTCAGCAGGCATCCGA  
TGTCCACGTTTTCTGGAAAAAGGTTGGCATCGATGCGTTCCAATGGATAATCCGTTTTTTGAGAGCTTCCGAGATGAA  
GGGTCCTTCTCGTTTCAAGTACATTTGCGCTCTTCGCAAAAATGGTGTCTCGTGTTTTGGTGTTTGATGGAGC  
AGAGTCCCCAGAAAGAAAGGAAGGAAAGAAAGGACAGGAAGAAAGAAAGAGACGAACTTGTGAGAAAGAAATTC  
TTGAGAGGATTTTTGAAGAAATTTGACGACGACTGCGATGTTGTCCGAAAGAGCGTCCAGGAAGACCCAGGAAATGGCTG  
CACAAAAAGAAATACGACGAGTGTGACCTTTCTGACCTTCTGTTTTTTCGAGGACAGTTCTCGAGTCTTTGACAACGTA  
CACAAAAAGTCTGTTCCCTCACGAACGAAAGGGTGAATCTGTGAAGCAACTCATGGACGTTCTTGAATTCGCTATG  
TTTTGCGAAAAGGGAAGCCGATGGAGTTCTTTCTGCTACGTCGCAAAAGGGAAGCTTTTCTGCTGTTTTCGCGAGC  
ACCGATGTTACGCTTACGGAGTGCCTTTTGGATACAGAGATCGACACCTCATCAGAGGCTTGTCTTGTTCATAG  
AGAGCAGTATCTCGAGGACCTCGGACTGTGAGGAAACAGTTTGTGGACTTTGCACTCATGTGCGGCTGTGACTACAACG  
ACAGAGCAAGTCAAGAAAGGAAAGCTTCCGGAAGAGGCAAGGCACTCGTTGGAAAACCGCACTTTTCTTGTAGTTCCG  
AAGCACGGCTCTTTGGAAGAGATTGAGAAAGTTTCTGGAGTCAATGTGGAGCCGCTCAAACACAAAAGATGTAGAGAGCT  
TTTGAAGACACAAGAGACAAATGGATGAAATCCCCAGGAGGAAAGCCAAACAGAGAAAGACTTGGAAAATTTCTTCCAAG  
AGAACAAAGTGCCTTCGACGCTGACTATGTGATGGATTGTTGGTGCCTATCGACATCAAAAAATATTTGTTTGAAC  
AAAAATATTTTGTGAGAGAGTTTTTGAACAAGAGAGAACTCTGTTTTGCTGTGCGACATTTGTTTCCAAAGAAAG  
GAGAGGTTTCTCAAGTTCCATTGAGCAAAACATAGAGAGTTTTGGCTTCTTCAAACAAGAAAGACCGGACCCAGAAAA  
GATTTTTTGTGAGAGATTGTACATCAGAAAAGGACTTGAAGAAAGCGACTTCTGATGGGAAAGAGACCTATACACAG  
AAAAAGGTAGAATGTTGGCATGAGAACTTGGAGGACCGAAATCAGACATGGA AAAACTCTCCGCATCGAGAAGGCGTAC  
ACATCCGAAAAAATGGTGGAAAAACGGAGAGCTTGTGATGACAAGTGCACATCTGATGATTGCTCCACATTTTTTTGGC  
TGGAAACGACAACAACGTACAGAAAGGACGGAACAATCTGAGAACTATTCAAGAAGCTTTGGAGGCATCGCTTGAAT  
TTTCAGAGGAAAGGAGCGTCAGAAAGCGCTTTTCCAACCATCTGTGACAAATATTTTTTATGGATAAAAAATATTCAAAGC  
TTTTGTGAGAAAGGAGTGAATAATTTGCCCTTGTGAGCTTGTTCACCTTTTTTCCATTTTCCCTTTCGTCATCTCTCGTA  
CTTTTCGAGAAAGTGTCTCCCTTTTGTCTTTGAGCCAGATGCAACGTCATCAGCAAGAACCAGAGCTGTTTTTGTGT  
ACATCTCATGTTCTGACACTGGAACATCAGAACTCTTCCACCGTCTCGCAATGTCTCGATGTCTGTGTCTCATCA  
ATGAACTCTGAAATTTTTCTTTGAGAGTACATCGTCTTTTGGACCTTCTTGCAAGATAGCACACAGGAGAACAA  
AAGGATGTGTTCTTTTCGCTTGTGAGCAGCAAAAGGCGTTGCTTTGCGCTCCACACAAAAAACACGTTGCTCCGAG  
AACAAAAGCGCTGGATGTACATTTAGAAAAAATCGTGTCTATCAACATGCTCTGTTTTGCGAAGACCACACCATGTC  
TCTCTGGTAGCTGGCATCGAGACTGATTTCCCATCAGAAAAGCTTGGAAAAACACTATTGAGGTCGGGTCCGAACTCT  
CGCTTTGGCGCTTATTTGTGCCGACATGAAAAAATCTGAAGTCTTCATGTTTATTTTCTTTGAAAATAAACTTAAGT  
GTNNNNNNNNNGATGAATCTTCCGAGTCCGAGACTGACAAATCTGAGGAAGAGACCAAGCCCGCAAGAAGCCTCTCGT  
CAAAACCTCTTCTTCTCGCAAGTTGTCCCTGCCAAGAAGAACAGAAGGATGAATCTTCCGAGTCCGAGACTGACAAT  
CTGAGGAAGAGACCAAGCCCGCAAGAAGCCTCTCGTCAAAACCTCTTCTTCTCGCAAGTGAACGAAGAGACAAAGGGA  
AAGGCCAAGGTGGAGAAGTGCCTCGAAGAAAAAGGAGAGACTTCTGATGAGGAAGATGAGGAAGAGACCAAGCCCGC  
CAAGGAAAGGCAAGGAAGAACTGTTGTGCAAGAAAGAAAGGTTGCTGCAAGGTTGAGAAAGAGCCTTCCACCAAGG  
GAAAGGCCAAGGAAGAATCTGCTGATGAGGCAGAGGTAAGAAGCCGACCGCAAGAAGTCAAAGGTCGAAGAAACCAAG  
ACTTCCAAGAAAGGAGAAGGAAATTTGTGCAAGAAAAAGGTAAGGCGCTTGCCTTTGACCAAGAAAGCCAGCAGCCTTCT  
TTACAACGAAGAGACTGGTCTGTTCTCCATCTGAGAATGAAGAGTGTCTTTGCGATGATGGATGGCGACGACATGG  
TCGAAATGGACGACTGCGCTGAGAGTGCACAAAAAGCATGGCTTTATCGTCCCAAGGGAAGAACTTTGCCAAATG  
GTAGCGTCTCTCGCAAGAAAGGAGCTTCCAAGGAAGAGGAGCGATGAGGAGGTCGAATTTCTAAGTTTTTATATTTCT  
TTTTTCAACAAGAAATATCACACAGTTCCATTTTTTTGTTTCCAATCTTGTGTTTTACAAATCGCAGAGAGTTACAATAAC  
TTTTTGGTCAAGTGAAGAAACAATGGCTGACTTTAACAACAACTGTAACCTCGAAAGGATGAGTGAACAAGAACTCGT  
AAAGTTTTTCAAGTTTTTGGTGGAGAAGTTGTCCCTTAAACAAGAAGATGTCGAAGTGCCTGAAAGACTATGGAATG  
GTGTTGTTCTGAGGAAGCCTGCAAGGACAGAAAGCCTGCGCTTCCAAGAAAGACGCGCAAGGTTGCATGTTCCATG

TTTATTCCGAAAACCTGGAGCTCAGTGCAAGTACAAAAGTCCGCGGAGGTCAATGGAAAGATGTATTGCACCTTCTCATGC  
AAAGAAGCTGGCAAGTTCTGACGCAAAACACAGCTCTCCGCGTAAAGGGGGCAAAGAAAGAAAAACGCGAGTCTCGATGAAG  
AGACGACAGAGAAAAAGAACTCAAAGCTTACAGGATCTCAAGAAGATGTCTGTTGAACAAGTTGCAAAAGAGCGAAAAG  
ACGGGCAACTATGTCCACAAGAGCACGGTTTCGCTTTCGACCCAGAGGACAAAAAGACTGTGATCGGCTTGGAGACGAA  
AAACGGCAAACCTTGGCTCTCACAGAGGCTCAGAAAGCGACTTGTGGAGATGGGCTGGGAAGTGAACGACGGAACCC  
TTCCACTTCCAGAAGATATGGATGATGTTGACCAGGAATCCGAATCAGAGAGTGAAGAGGAAGAACCTCTCGATGCGAGG  
GACGACCTCGACATTGGGGATGAAAGAACCTAGATATTTTGGCTTTCGAAAAATATTCAAAGATTAATGAGCAGCTACT  
CTGAATTTCTGCTTTCAGAGATACAAACATGCTGAACCTGGATTTCTTCTTGTTCATCGTGGGCATGATTTGTTTGGCTT  
GTGTTTTTCCGAAAACCTTCTGCGTTCATATCGAACATAAGGAGGGATACGATGGGCAGGAAGAGTTTGTGTTGACAGA  
ACTCAAAGAGCGATGCTCCTTCCAGACAAGAGCCATCTGGAATGACAGAGGCCGAATTCAGATGCGGCGAATAACA  
AAAGAATTCAAGATGCGAGCAGTGTGCGATGCTGGAGTTGAAAGTGTAGATGGAAAGAAAAGGAAAATATAGTTTTTAC  
TTCCCTGTGGGAACTTCCGGATACCCCTGAACTTTTATTGAGTTTATACGATTATACCCCAAGAGTTTGTGCTTCCG  
AGGATGGAGATTCTCAAACCGACTCTCCCGTTTGGTTGCGCGAAGGTGGAGGCTCTTCAAAGGAAAGTGGTGGTCCG  
TTATGCCCTGAGAAAAAAAAGATATATTTGGTGGATAAAAATATATAGAAATGTCTTTTTCAGAAATCCGGAGAGAATC  
TAAAGGAAAAGTCCGCGAATAAATATATTTTCTGGATAAAAATAAAGAACAGACTCTCTCATCTTTCGCTTCTTGTATT  
TTTTGCTCTCTTGGTCTTGGCTTCTCTTCTCCGCACTCCAACAAAGCATGTCCCTCCAGTCAAAGAGAAAGAGTCTC  
TGATGCTTGATATAGTCTCTGCGTTCATATCGAACATAAGGAGGGATACGATGGGCAGGAAGAGTTTGTGTTGACAGA  
TCTGTCTTTCGTTCTTAAATCCAGGTCTCACCGTGAAGCAGTTTCTAGAACACGAAAGGATTCCAAACAGACAAGGATTC  
CGAATGGCCAAAGTCCCAATAAAAAAATCCCATTTCTTCCAAACGAAAATATCTCAAATAATTTACATAATGGCTTGTGTC  
CGGAGCGCTTCTCTGCTCACCTCTCTGCTTTTGTGCTCGTGGAGGAAATGTGACTGGACGGGTAGAGTGCAGCA  
ACTATCGAGAGAAAACCATCGAAAAGGTCAAACGAAAGATTTCCGTTTATGGAATACACTACAGAAAGAGGCAAGGTCCGGC  
CGTACATTGCTCAGCTGGCAGAAATCATCGACAAGTTTATAGGGTGTACCTCTCTGTCACATAGAGGACGCTTCGGA  
GCGTGTTCAGCTCAAATTTCTCAAAGCTTCTCAAACACAGACACTGTCCAGAGAATGACAGAAACCCAAAGAGCA  
ACTTTTTGAGATTTCTCTTCTGAGGTTTCCAGCGCAGAGTCTTCCGACGAATTTCTTTTCTGCTCTGTGCGAAT  
AAAAATTTTTGAACTGAAAAAATATTTCTTGTGTTCTTCAAACAAATGGACAGATAACTGAAATTTCTCGCGGAGA  
AGGGATGCGTCTTTTGGGAGAGTTAAGGGAGAGGAAAGAAAGATTTGCTTTCGTTGCAAGTGCAGAAAGGAGCGGTGC  
TTTGCTATCAAAGCAGTGTGTGAGAAAATCTGGGTGGTGTTCACCTTGTATCAAGAAAGCGCCAAAAACAGAGAAT  
TGTGACTTTTTATCAGGCGCAGAGGAGACTCGAGAGCAACAACAAAAACAATTCACGAACATGCGCAAGAAATAAACCCTT  
GTCAAATTCATCTCCGATGTTCTGTCCATCATCGACACATGAAACGTCAAATAAAGACTCTCTTTTTCTGGCTGATTGTG  
TCCATAAAAGAGTTTCAAAGAAATTTGTTGACGTTCTCTGTTTCGTTCAAACAGAGAACCGACTAAAAAATATGTTTTGTTT  
TAAACATAAAAAATGTTGGAACAAGAGTCCCAAAGTTTCAAGACGACCTCACTCGAGGTCTCGGCGTCAATGGCAGTT  
CACGAGGCGAATCGCGGAAAAAATACATCAACATCTCACATCTTCCAGAGAGAGAAATTTTTGGGTGAGGATATCACTCG  
AAGAAGATGGGACTGTTTTTTTCCAGCGGAAAACCTCGCAACTTGACAACATTTTCTCAAACGAAAAGGAACTATGCGTC  
AAGCTTGTCCAGGAGAGAGATTTGTTCTGTCTGAAACCTACCAGCTGATGAAGGTTTCGAGAGCAGCTGGAAGAGATGAACAA  
AAACTTTTCGAGACTTTTAAATCTCTTCCAAACGGCATCGAATATTTCTCCAACAATGAGAAAAAGATGGAAGAACTCG  
AAGAACACTTTTGTGACTATCGAGAGAAACAATAAATAAATATATTTTGAATAAATATATTTGCAATAATATTTGTCCTCTGCTGTC  
AGAGCTTTTCACTTACTTTGCTGCTGCTTTTGGGTCGTCGAACATTTTGGATCGAGAAGATGTGATTCTTGATG  
AGCTGTCAAAGGAAGCGATAAAAAATGCAAGGTTCAACTTTTTCGTCCTTCCAGTACTGTACCGTTTGGGGAAGAGCAGA  
GAATACATCAAAAGTACGAGCTTTTGTGGTGGACATTTGAAAATTTGACCAAGACATAAGAGGTCACAAATACGAAGA  
AGAACTTTCTCTGGTGTCTGAAACGACTCCCAAGTGGAGTGTATCGAAAAGTTTCGCAAGAAACAAAGGATGCTC  
TCTTTGGACTTTTTCTTTCTGGGATAAACTCCCATGAAAAGTTTCGGAATCTCTTTTTGATGTTTTGTGCGAATAA  
ATATCTTTTGAAGGAAAAGATATGGAGTTTCTGGCGTCTCCAGAAAAGAGATGCTCGCCATCGCGATCCGGAGGTGA  
TAGGTAGACTTCCAAAATGCTGGGACGAACTCCAGCATTTTGGAGAAAAGTCTTTGATGTTTGTCCAGAAAGGGAC  
TGGTCTCTGCCGATTTCTCTTGCAGTTCGTGCAACATAAAAACCAATGTTTCGCTAAAGGGCGAAAAGTAGAATATTA  
CATGTTAGTGATGATTTTCGACATGTTTATATCAGCAGAGACAAAACCTCTCTGCTCTCTCGAAACTTTTCCAAAGAGC  
TCTCCAAAATTCGAGAGTACGTCGGAGATTACGAAGAGGAGCTGCAAAAGTTTGCAGGGTGGTACCAAAAAATATTTTAG  
CCATATTTTTTAAAGAAAAGCCTGGCAATGCTCAGGCTCTTGTGTCGAGAGGAAATTTCTCGGTTGTTCAAGATTTCCGAG  
AAGTCTCTCCACGAAATTTGAAGATCGTGAAGTCTCTTTTTTTGCTTTCGAACTTTCTCTTTCAGATTTTTGTTCTCTT  
TCTCAAGGATGTCGACTCTCTGCTTCCAAGAAAAGACTTTTCTTCCATCCCTTATGAGATGAAAATTTTTTGGGAATTTCT  
TCCCTTGA AAAACGGATTTGCTCTCAGAACCATCTTCTCTCTTTGCTTTCGTAAGCACAGCTCTCACTCTTTCTGGG  
TCCATGTCGTTCCCTCGCATAGGCAAGGGCGGCTCTCGCTTTTTTTCTGTGTTTCAAGGAAAAGAACCTGGAACTGTCCC  
ACAAAAGTCTGAATCTCTCAGATGTTCTTCTGATTTTTTAAACGTTTGCAGCTCTGGAAGGGTCTTCTTCTTGTCA  
GTTTCGAGTGGCTTTCTTTCAGGGAGAAATCCCTTTGAAACGAGAGAAATGTGGGTGGGACCTCTCGAAGAAATCTTTTT  
CCTGTTTTTGGGTTGATGAGAGCTTTGTGACTCATTTACCTTGTGTCAAAAAACAATATCAAGATTTCTTCTGAGG  
ATATTCCATAAAATTTACTTTTCTTTTGTGAAGAAAAGCCCTGACAACACACCAGAAAAGTGTGTTAGAAATATTTCTCCC  
TTTTGTTGTGCCATTTTCAGGCACTCGTCTTCCGAAATTTCTCTCTTGAACAGAGAAACAACCTGGTTTCCAGATCGGG  
GTCTGCGGCGAGCAGCAGATTCGTCATATTTCTTGTCTTTGCAAGTATTTCTGAGAGTCTTTGAATGGTGCAT  
AGACCATGATTTTGAATGAGTTTCAATGTTTCAACAGAGACAGACATCGTTTCGCAACAGAAAATCCCGAGTGGCAGAA  
AGAAGAACCGGAGCGTATCTGGCCCTTTCTGGGGATGGAAGCTTGAATAATCTCGAGGAACGTTTTTGTGTTTGGGA  
CAGCCACAACAACCATGATTTTAAAGTTTCAAACATATATTTTTTGGATGAAAAGTCCATGAGTTTCTTGTGCT  
TTGGCAGCATTGATACGAGAGAGCCAGTGTCTGAAACCTTTCCCTTTCTTCTGAGCGTAAGCGCTCAAAGTCTC  
AAAAGACTGTTTTCTTCCGAGAGTTCTTTCTGTCTCTTCCATCCGCGCAATCTCTTCTGAAAAGAGCTGGAAACGA  
AAAAGCTCTGTGTAAGCCAGAGCTTTCAGCTTATTTTTCGCAATCTTCTTACATTTCTTTTCAAACA AAAAGAAA  
GTTTTTAAAGGTGGAAGAGCCAGAAAGTTTTTGGCGATGATGATTCGATGCTGCTTTTTTCAAAGAAAAGCTCGTC  
CTGCCCCATCGTCCAAAAGCAGATAGAGTTCTCTCCAGACGAATTTCTTGTCTTTGTAAAAATTTGTTGTTCTCTC  
CTCGACCGAGTGGTTTATTTTGTGCTTCTGCGACACTCATGTTTGTGACGAAGCGTTTCCATCCCTCGACCGT  
CAAAGACTGTTTTTACCAGCTTCCGTTTTTGTAGGTGGTTTTGTCCACCCATCTATAACCTCGTGCATTTCTATC  
CCGTGTTCTCTCCGTTTGAAGTTTCTGTGATGTTATCTCGATCCGTCATTTGTTGAGAAACCTCGCTTTTCTAC  
TTTTCTGTCTGTCGTAAGAGACCAAAGAAAACAACCTCTTTTTTCCAGAAAATTTCTCCATCTACACTCCGCGGAGG  
GATAGTCTTCTATCCAAAGGCGGAAAACCTCGATTGATGGAGATGCTGTTGATCGGATATTTGATGACGTGCGCT  
GGAGCGTTGAGAACTTCTCGTTTTCTGTGCTGTAACAACAGATAAATGCGGTGGATAGCCGATGAGTTGACTCCGAG

GTCCGCTTTTGTCTCTGGCTGAAGACGAAAAATAATGGGAGGAGGCTGGGATTGGGAGAGACCTATGCCGACATCCACAG  
CATGCTCTCTCGAATTGTTCTCGAGAGCGAGATATCTCTCATCGATGGATTGACATCTTTTTCCGAGAGAGGATAGGAC  
CCCTGACTCACTCTGTAATCTTGACTTTGAAACGACAGAACAGGGCGCGTACGGCTGCATGCAGTTTGCAACTCTCGA  
GTTTCATCGGTGGCAGCGTGTCAAAGGCCCCCATGTCTCCACCAGTCCCAACTTCGAGAGGCTCTCTTGTGTGTCCA  
AGAGTTCTCCCAAGCCTCGAATGACCTCTCCCGGACAGCTTCGAGATTTGCAAGCAGGGCAGAAAAGACCTGGATAT  
TGAGGAACTCCTTCCGGAGAGCTGACAGCAGAAAACCCAGTCCGAGAGCGGTCCGCGCTCCAGAGACGTAGAGGCTTTTTGT  
GTTGTGAGGAAGGGAACGAGGGTCCACATTTCCAGGAGAACTCGGGACGTTTCTGTCCGACGTTCATATCATAAATTC  
CTGACCAAATAACATCTCTCGAAGTCAGAATCTTTCTGGGTTCATCTGGCCTTTCTTCAGAAAAGCAAACAATCATT  
CTAATCAACAAACTGTGATCGCAAAGCTTTACCTTTTTCAGATCAATGGATTTCCAAATAATTCGAGCAAAGAGGACTG  
TCGTTCCGATGATGTCTGACAGAGGGTACATGCCATCAAAGGTTGCCAGACCCAGAGAACTTCAGCAAAGAGCCG  
ACAGTTTGGGAGTTGAGAACGAACAACAAGAGGCGAACGTTTGGGACCTCGACACCGAGTCAAAGATGCCATT  
CATTGATATGTTTTGAGGTGGCGAGATGGACAACTCGAACAGGTTGTTATTGTTGGTTCTAAAGTCCCTTGTTCGA  
AAGCAAAGAACACTGTCTCGTCTCGATGTCTGCAACAGTTCGAAACCAACGGTGTGGAGTTTCTGACCTCCAGGTCACT  
CCAGACCATGTTCTCGTCCCTCTCACAAGAGCTCAGAGAAGAAAAAGAGGGAAACTGGAAAAGTACAAGGTAAA  
ACTTGAAAATTTGTCCAAAGATTCTCAAGGATGACCCCGTCTCCAAATGGTACGGTTGGGTTTGCAGGACCTCATCAAGA  
TACTTCAACCGAAAGAGGGGAGCTTTGGGTCGAGCGTCAACTACCGTTTGTGTTGCCATAGATTAGAAATTTTTTCATAAA  
AATTTCTTTAGTAATGCAAGCTCATGGCATGACTTTATTAGGGCGCACTTGGCAAAGGACACTCGATGGCTGAACTCG  
CTGCTCTTTACAAAAGAACGACGGAGCGAAGCGTGGTGGAGCGATGAGGGAAGAGGATGTGATTTGTTATAAGCGAAT  
CGAAGCGCTGCTGGCAGGAAAAGGGTCTCCCAAGAGAACTCTCCCGCCAGAAAGAGGGCTTCTCCTGGAGAGCGCTG  
TCGGCAGCAGAGGGGCGGTTTCGAGAGTTGTTAGTTTCTCCATTTGAGAAGGCGTAGCCTGTTCTGCAAGGGCAGTGT  
AGACCACCAAAAACAAAAGAACAGAGAACAAAAGCTCGAGAGAATTCGGCTTTTCATCGGAAATGTTGGCTCATAAGAA  
GCGAATAGGGAGCTCAAGAAAATGCCAAAGGCAACAAGGAGACCGCGAGTCTCGACATTTAGTTTCTAAAAGTTGAAA  
ACTAAACGCTGTAAACACCGCAAAGAAATTTCTGCGATATGAAGCTTGAAGCTTTCCCTCGAATCTTTGCTCTCGAAATATG  
GTGCCACATTTTGGCTTTTGTGGTGTGAAACGACATGTGCGGATGAGAAGCTTTTTCAGAACTTTTCAGAACTATGGACG  
TGGATGAAAACCATCAAGAAAAGATAAAAACATGTGGTTCGAGAGGTTTGGCGAGAGATGTGGCGGAAAGCACCAGAAAAG  
TCAAAAAGAGGAGGATGCGCTCGCTGATGTGCTTGGTGTGCTTTGGAAGCAAAAGCCGATAATGAGCAGATACCCCTCA  
TCCGCTCTCCAGTTCCTCGTTGAAGCTCTCTTCCAAAGTCAAGGACTCGGCTGTTGAAAATCAGACAAAAATCCCTC  
TCATTTTTCACATTTCTTTTGTGGAGGAAAGAACTCGCTTTTGAACCTTTTCAGAACTTTTCAGAACTATGGACGTTT  
ATATGCGTTCCAGGAAGGTACGAGAAACCTTCGACCTGAACGAGTTCAAGAAAAGGGTGGAAAAAGTTTGGTGTCTCAA  
GTTTGGCTTGGATGGGCGAAGAAAGAAAACAAAAGCGCTTGTGGATGGATGCGACTGGGCAACAAAAACAAGCAATTGA  
TGGCTGTTTGGAGGAGTAGAAGAAATATATTTTGAAGAAATATATTTTGAAGAAATATATGACAGAGCTTTTTCAAGA  
ACGGAGATATATTTCTTTTGTGTTGTCAGAAAGGTTCCCCCTCTCAAAGAACAGAGAGACAGGTTTTTGAAGGGA  
GAATGTATGGCTCCATCAAGGATAGGGAATGAACTTTTGAAGCTCGTCTGTTTCTGAGCTTAAACGAAACAGAGAAAAGGC  
TCTTCTCGGAAATGCGTGGAAACAGAAAGACATCGAGAGGTTCCGGTACGCTGACGCTCTGAAAAGGAAATACAAAATACA  
TCCGAGAGAACGACGATGAACTTTTCACTCTCCGCGGATTTTACTGCGACATGTTGAGAGGGACATGCTCAGCAGT  
GTGCTCGCTTAAGTTTGTGTAACAGCAAAAGCAAGCTGGCAAAACATCGCGTACCTTTGTCTTCGATGCTTCAAAC  
GATGAAGGAGAGGAGGAGGATAATCCAAGAAATTTCTAATCAACATATAGAAGAGAATATATTTTGAAGAAAATA  
TATGACAGAGCTTTTCAAGAACCGAGAGTATATTTCTTTTGTGTCAGAAAGTGTCTCTCTCAAAGAACAGAGAG  
ACAGGTTTTTGAAGAGGAGAAAACACATGGATGTATCAAGATAGAGAACGACCTTTTGTCTCTTGTGGTTGGAGACT  
GACCATTTTGAAGGGAAAATCTTTTGAAGAGCGCTTGTGAAACGGAAGACATTGAGAGATTGGAATTTGACGTTTTG  
GAAGGGAGACAGAAATACATGACAGAGAACGACATGGAACGTTTCAACCTTCTATAGATTTTTATTGCGATATGCTCG  
AGAGGGGACATATTCGACACTTTTGTCTTTATGAAGAGCGTGGAGAACTGCGCAAGATGTCTGCTGCTCATTTTTGTGT  
GCGATGCTTGGGATGATGAGCAGAAAGGAAAGGAGTTGGAAGAGCTTCCGTCAAAGTTGGAACGTTTTTTCAGAGA  
CGAGATTTGAAGACTTTTTTGTCTTGTGTTGAAGAACCATATCTTTCAAAGTAAAGATATTTTTTAGCTTCTGTCTG  
GTAGACGAGGAGACCTGTTTCTGAGCGTGGCGGATGTTCTGAGGGAGTGACCCATTGAGATTCGAGACTTTGTTG  
TTGACGCGAGAGCGAGGAAATTTCCATCTTAGTTTCTGGATGGGGCACCATTTCTTCCATATCTTTATTCTGAAA  
TATATTTTTAACTCTGTCTGGAGGGAGATGAGACCTGTCTTGTGCGCATGACCGTCTGTTCTATACTCTTCTTGT  
GTTCCGCCATTTATATTTTGGGCTATTGTTGTCAATTGTTGCCAAGAAAGGTTGGAGACTCTGTTGTCTTTTTCGACC  
ATTTATGTGATCAGACTTTTTTGTCTTTCTTGGGTTCTCTAAAATGCCTTAGCCACGAGCCTATGAACCTTCATAG  
TTTTTGTGTACACATGGCCATTGTACACAACTTCCACAGGTTTTTTCTTGTCTTTTCTAGAACTCTTCAAAGAA  
GAAACCGTCACTGTTTTGTTCTGTAAAGAAATGTCCTCCATTTCTTCCGTCAAAGTCAAAGAGGACTGTAAACACCA  
TAGAAATCCCATATACTTTTTCCAGAAAGATAAGGCTCTGCCAATCCCGAAAACCTTACCCCTGCGTACTCGAAATAG  
CTTCTTCTTCTGTCGAACTCAAGGAAATTTCCGCCATTTTCATTATCTGGACAAATGATGCTGTGGACAGTTCCGTT  
TTTTCTTCCAACTCTCTTCTCTGCGGCAAAATTTGCAAGTTTTTCGACTTGGAGATTGTAGGATTTCCATCGATACA  
ATGAATCAGTTTTCTGTCTCTCTCTCCAATGAAAGCGTCCGCGACCAACTTTTTACAGAAATAATTTCCCTTTGA  
TTGTCAACACCATTTCCGTAATTTTCTCTGCTGAGTAAAAAATTTTCCGGGGACGACACTCTCCCTCTGTAGAG  
ACTTTGAAGTTTTCCATGTTTGGTATATCTTTCCAGATTTCTCCCTCGAGATCGACAACAACCATAGACTCTTTTTCT  
CTCGCTAAGGAAACTATGCTCTGTTTCCAAAGATGCGTACATATCTTAATTTCCACTCTGTTATCGGAAGGCTGAG  
AATTGCGGTGGTTTACCACAAGATCGTCTCTGAGTTCTCCACAAAAGCTTCCGCAACCAACCTATGAACAAAAGATTG  
GAATATTTCAATGATCCCTGGTGTCTTCTTGCCTAATGTTTTATGTTCCATTGAGCAAAAGTCTCCCTTTGTTCCGA  
AACTTTGAGAAATGTTCTATTTTTCCCGAATAATTTTTCAAACCTTCTCCCTTAGGCTGGATCGTCTCCCACTTCC  
ACACAAACCCGGCAAAGTTTTGAAATTTCCCGTTACACACAGTCTGACCTGTTGAACCTTCAAACCTAAAGACTCTGCT  
ATTTCTTGGGGCTCTCCCAACTGACAAAAGACCATCTTTGTTCCATTGTTGACTGGTTTTAGTCTAAGAAATTT  
TGTTGACTTTTGAATCCCGCAGGAGGCCAAAATAAATTTGGAGACATGGTTGTTTTGCAATCTCTGCTGTCTGTTTTA  
CGCATTTCAATCCCTGCGGTTAGGTAAGGAGGCGCCGACATCTTCCACTCTCACTCTTTTTTTGGTAGTCTG  
ACATGAGAAGCTCTCTCACATTTTACAGGGACCAATTTGCTCAATTTTCAATTTTATTTCTCCGCAAGGAGGACTTG  
ATACTCATATCTTTCGATGGGTTTCAAATCTCTTCTCTCCGCAATCGCATTTTTTGAAAGAACGAGGAATTTGAGT  
TTCTTTCCGCTTTTTTCAAAGAAATAATTTGTTGACAAATTTATAAGTAATATGCTTTCGCTCCAGGAATGTGCGATT  
CTAGTAAAGTGTCTAATGAAATTTTGGTGGATGCGGTTCTCTCAACTCCCCAGGATTTACCTCTTGGCCAGCTT  
CCGTATGGGGGTATTTTCAATTTTAAATCCATGCGTACAGACCTCTGCGGCTGCGGCAACATGCAATCTACGA  
CTGCGCCACGAGGGTACATCAGCCCTATGCTGTTATCCACCCTATACCTCGCACCAAAATTGAGAGTCTCTACCAGC



GACAAACAATACAGAAGGAAAAATACCTTAAGCGATATAGGTGCTGGCTGAACGAATGTTCTTCAGGACCTCGACGACAT  
CCCAAAAAGAGTTCCTTGGAAAGTACGATATATAAACCAACCCGAGGGTGGAGAGGAGTTTCCCAACATTGGTACGAATGG  
GTAGATCCAGAAAAGGAGAGTTAAAAACACCAGAAAAGAGAGTTTCATATTTCCACCGTTGACAAAAGGACCAATTCATCC  
GGCCTTTGGGAAAAACGTGCCAGACGACGGTTTCGTATTTTCCTCGCCTTGGCGATGACGAAAAGCGGACGCTTTCGCGGCGC  
TCGGGTACGACGAAAGTTTATCGCTGCGCTCTGTCTTCCATAGAATATACTTTCGTGACACAAAAATATTTACTTCCTT  
CTCTTTCTTCCCTCGCGGAGAGACCTCTTTTCTGTTGTCGGACCTTCTCTTCTGTCATCTGCTGTTTCTTCCAATTC  
AACTCCTCGAGAGGAGCGATTGCCTCATGAGAGGGTTTTCTCAGAAAATTAGAAAGGATGAGACCTTCGATGTGAACCTG  
GTTTCGCGTTTCGTACAGTCTCCGTCACAGTCTCCATAGTACGCGCCGATTTTTCGACCTTTCGATCGCGATCGAAGGACGT  
TCATTCACGAAAGGGAACCAACCGTCCAGAGTTCCTTCTTTTGGTAAAGTTCGCTTCGTCGTCTCAAGGAGAGAA  
TTTCAACAAATGTCGAACTCTGCAAAAGTCTTTTGCCTTCTTAAACGAAACGAAACGTTTACAGTCTGCATTTTATGG  
ATGAAAATAAAGAAGAAATTTCTCCAACAAATTTTAAATATTTCAAAGGAACGAGTTTATCGCTGTGTAGACGTTTCGTT  
CGCTCTCCGCTTGCAGTTTCTACTTCTCGTATAATGTGCTCTTTCGCGGCAAGTCAAGATTTTGGAGACTCTTTGTT  
CTTGATGGATGGGAGAAAAGAGAGTTTCCACTCGACAAAACAAAGTTTGGGATGCATTTTGGGATATAATTTTATCTT  
GTAAAAAATATTTAGTATTTCCATCCAGAACTTTTGTAAAAATTTCTTCTGTACGTTTGAAGTGTGCTTTCACGGCT  
GCCTTTCGAGAAAAAGTTTCAGAAACGAACTCATCTTTGGGGGGAAGCATATCAAAGGAATTTGACGTCGACGTAGAGG  
CTGTGTCGGTACGAGTCCGTTCTATGAGAGGATTTGAGAAATGTCTGGACATTTGAACAGAGACAAAACCTTGTGTGCAC  
CTCAATTTCTCTCTTCCCTTTCGAAAAATCTAGAAGATAAAGCTTTTGAACCGCTTGTGCAACGCTCAAGGAGAGACA  
CTCTTCTCTTCAGAGAATATTTTATGCTGTAAAAATATTTGGAATGAAACAAAGGATAATTCACCCAGGGAAGAGAA  
ATTTCCCTAATCAAGAGGAGCACTCGCCATTGACCTTTCGAGTTCGTCGAAAGGTTTGTGAGAGGGGAGCTTTTGTATG  
TGTTCGCGAGAGACGAATGGTTCGGAAGAAATAATTTTTCATTCAAAAAATATTTTGTTCGAAAAGAACAGAAAT  
GTTTGAAGAACGCGGGAAGCGACAAAACGCGCAAAAACAGTTTACCTATGTTTTCGTTGTCACAAACGCGCAAAA  
AAATAGTCACTATGCATTTTCGCTTCCGACAAAATACGCAAAAATATCAGTACCCCTGTGTTTAAATCAGACGAGGGT  
ATCATTTTTCGAAAAATTCATGAAAGTTTGAATTTGTGGAATTTCCAAAGGCCAGAAAATTTTTCGAGAAAGTTTTC  
TTGTCGAAAGAGTGAAGATGTATATATTTGCGCAAAATATCATATTTTATTTGAGAAAATAAAAATTCGAGACTTAA  
GGAGCAGTACGAGTGCAGACTGTGCAAAAATTTCTTACCTTTCCTTTCCTTTCGAGCAGCACCTAAGAATAAAAAGC  
ACCAAAAAGGTCAAATAAAAACAGAAAAATTCCTTTGCGGTGCTGCGAGTATGAAACTACTGTGAAACGCGACTATCGT  
TCCCATCTTCTCGATGAGGCGCAAAAGGAATTTAGAAAACAAAGAGTGGTCCGAGAAGGGTTTTGTGAATGTGCGA  
TTTCGATGCTGGGTGTGACGAACTCAAAAACCTCAAAAGGCATCAACAAACGAGACACATGCTTTCTTTGAGAAAATTTG  
GTCTTTCTCAGAAAACTCAAAAACCTCAAAAGACATCCTTGTGTCTCTTAAACGAGGATAAATCTCCCTTACACA  
GAACAAAAAAGGGCTTTTCTGTTGACCTTTGCCCTGTTGGGGCTTTGAAAAACCCGAAAAACGTCACCTCTTTCTTTT  
GTGGATAAAAAACACATAAAAACCATGAAATTTTCGTAAGAATGACGAAACAGGAGTTTTCGTCATTTCTTGGGTAA  
ATCAACAGCATAAAATGTCTAGAGGAGATTTTCATGATCTGATGTTGCTTTTGGCCGACAGAGTCAGAGAAAAACAGGAA  
AAGTTTACAAAAGAGAGGTGAAAGGAGAGTTTTCAGAGGGTGAACGGGCGACATTTCTGTTTTCGCGACAAAATGGGCC  
AGAAATTCGAGAGTGTGGTGTGAAATAAAAAATCTTTGTTTTGAAACAACTCCCATGCTTTCGTCAGTGTGAAATGT  
TTTGGAGTGGTGAACGAAAGAAAGAGTTCCACCCTTCCGCAATGTTCTTCTTTCGCGAGTAGAAGAAGAA  
AGTAGACCTTCTTACCGTTTAAACGAGGACTTTTCTTGAAGAAGATAAATTTTGGATGTTCTTTGATAGTACTCAGCG  
GACACGAGAAGAATATAAAGAAGAATTTTGGCTCTTCTTCTTCTTCGATCGAAAACCTTCTCTCTCTCTCTCTCAA  
AACCTGAAAACCTGTCAAAAGTTCTATTTGGCATTTTCTGCAAGGAGAGAAAAGGGTACGAGGGACATTAAGTCTTCT  
TTTAAATAGGGGAAACCCGGGACCTTTTTCGGCTAGGGTATTTCCATCTTGTGCGAGCGAACTCAAAAAGCCGAATAA  
GTTTATAGATAAACTGTCGTGTAGTAAAAAGGGAGTAAGAAAAACCCCAAGATGTTTCGTCGAGTGCAGAAACATGCGGC  
TTTTATCCACAAATGATCAGAAATTTGGAATTCATGTAAGAGAACACTACGAAAAAATAGGCCCTTTCATGTTCAATGAA  
ATGCCATTTCTGTTTCGTTTCGAAACAGACTCAGCCACACTTTTGTGGATGCAGTACAAAAAAGAGACACATGGCGTCTA  
AACTATATAAGCAAGCTCTCGAACATTTGCAAAAGGAAAGGAGCGCAGCATATGCTTCAACAGCCCAAACGATAGGCGAA  
AAAACAGCAACGAAAGTGTCAAACGACCTCGCGGACAGATTCGTCGCGGTGAATGGCGAATGGATCATTTCTGTCTTGGC  
ATAGAAATTTTTTAAAGAAAAAATAATAGTTTCATCAACCGAACCCCGAAGACGTTTCATTTCTTGGAAATGGAAGATT  
CCATACGAGCAATTCATTCAGGGCGCGAGTTTCGGAATATAACAGTGCCTTCCACTATTTTCGAAATTTTTTCCCG  
CAGTCTGGAGGACATCCGTACGAGCCTGTGACGACGCGCAGCTTTTCTTCCGATTCGTTTCCAAAGTGTTCAGCC  
GAATCGCGAAGAGAGCTTTGGGTGCGGTCCATGCTTTAGTTCGTACGATTTCCCGTCTTTCTCAGAGATGTATCTGGTGA  
CTAAAAAGTCAAAATTCAGTTTCTCTGTCGCGATGCTCTGCGCAAAATATGGAGCCTCTCTCACCCAACTTTTTTCA  
TAAATATTGTATGGGAAGTTGTACCTGAACCTGGCATGAATCTGGGAGCACACTTCTCGGGTCTTCTCTGTTCTTCT  
GGTCTGTGTGACAAAATCAGCGAGTGGGAATCAGATTTGCGATGGCCAATTTCCCTTTCATAGTTTGTCTGAAAAGCGC  
CAGACATCTTTACAATATTTTACTTCCATAAAAATATCTTCACTAGAAAAAGTGTTCAAACGTTTCGGGTACGCTCCA  
ACAGCCAAATATTTTCTTCAATGTATAGACTACACAAATGATGGAGGATGAAGCTCTCCCATTTGAGGGTAAAGTAA  
ACAATGCGTTCCCTTCTTGTCTATAGAGTGTTCGATTCCTGTTGCGTTTTACATCTCAACACTTCGCCACAAAT  
TCACAAAAGGGGATGTGTAATTTTCTTCTTAAAAATTTTCGATCAGAAAAGACCTCGTTTATTACAGTGTGAAATTA  
TGTCTTTAGTTGCTCACGTTTATCACAGCATCGTGGTTTGTCCACAAGGGTATGCTTTTCTGTTCTTCTGAAAGCTCT  
CGTCCGACGCAAGAGTGTTTTCCAAATTTACCTGGTTGCCGCAATACAAACATCCACTTAAACGCTTTCGCCGATTTT  
CCTTCCCATTTCTTATCATAGCCGAGGCATGGAATGCTTGAATCTTCTGTCAAAAATGGTTCGAAATAGCCACTGCTTTTCC  
CTTTCTGTCGCTTGTATCATCACCTGTAAAAAAGTCAAAATTCCAAAGGAGAGGTTGATTTGTTTCCCTCATTTTAT  
CCACAAATCTTAAAAATTTTCTTGAAGCAACTGTGTTTCGTCGCTTGGCGACGGGAGATTCCTTCCATTTTATGTAAC  
AAAGTTTGTGTAATTTTATGCGTTGTGAAAGAGTTTACGACTTTTTCGTCGCAAAAGGCAAGGACGCGCCGAAT  
TGTTCCTGGAGGTAAAAACGCGAGAGACAATTTCAAACGACGACGCTTCCAAAGTATATTTTAAAAAATGTGGAATAT  
TCTTTCTGTCGAAAGAATATTTTGAAAAACATGGAGGGAGTTATCCGTTTTCGAGACTTTCGATGGAAGACGATGAATGT  
GATGCAAAAGGCCATACGTTGAAAAGTTCGCTTATTTTCGAAAGCGCTTTCGAGCGAAAAATGGAGGGGAGAACAAAGAAAA  
GTTCCGCAATTTGGCTTTGCTGAAAGAAAGCAAGAGAAATTTCTTCTTCTGCTCTCGATGTTTCGTTGCTCTCAAAGAGA  
AGGACAAGGAATCTTTTCATCTCTTCTTCTTCTTCCGATTTGAAATGCGAAAGAGGTTTCTTCCCTTACGGAAGAC  
ACGTGCAAGTCTTATTTCTTGGTCCCTTGTGTGGACAGCGCATCTCCGACAAAAGTTTGGATATTACGAGTTTGG  
AATGACTGGAGGTTACATGCTCTCAAGCCCCATGAGGGGAAAGTTCGACGTCAAAGACTTTGTTCTTGGCTCGGAGACT  
TTTCTGCAACAAAGGTGTGCTATGGGTACGAGGAAAGTACAAATGTTCCGCTTTCGATTTTATTTGTGTTGTCATGTA  
GTCAATTCGAAAGCAAGAAGAAATTTGTGAGAGAGATGTACAAAACAAACGGGCTCTGTTGTGGTCCCTGCACACCAGTTTTT  
CCTACGCTCTCTTCTGCAAGAGTGTCTTTGCAAAAAGGAGGAGAACTCGATTTTTCTCAGAGAGGAAAATGTTTTTTG



TTTGTCTGCGACGCGTTCGTGTAGTACCGCCAACCTCGAGTTCCTCAAATACGACAACACAAAAAGAAAGATTTACCC  
TGGGAACACTCCAAAAAAGTCGAGACTTTGCGAGCCGGTGTTCCTTTCGACAAGGGATTTCTCCTAGGAGAAAAATTTCCC  
ACAAGAAGCCGAGGCTGCCTCCATAAGGTTTGAAAAAGAGTAACTTTTGTCTCGAAACGAAGAGACTATAAAAATTTCTG  
AATAAATTTTATCATGTCTGTCTCATTCTTTGGTCCGACGATAACCTCGCGTCGCTCATCGCGAAATATCTCCACCAA  
GAGACGTGCTTTCTTTCCATACAAACAAACAGAACAGAGAACATTTTCAAATGCCTTTTCTGGGTTACTGAAACAG  
AGTTTGGTGGACAAAAGGAGCCACAGAAATTTTGAAGATATTTGGTGGTCAATGTTTTCGCAAGAACTTCTCGAATATGTTTT  
GGAAGGGGAAAGCGCTTCTACATCACAAACATTTCTATCCAGAGGTTACTTTACCGTACAAACAGAGAATATTTGACT  
CTCTCGTCAAAGGAAAGTAGTTGCCATCGTCAGAGACCGCATCAGAACAAAAGACAAAGACGAACTGTATCTTTTGGGG  
CATTGTTCAAAACCGGAGAAAGAAATTTATGGTGGTATTTCGTAGAGGGGTTTCGCATAGAAAGATTTTGGCGAGA  
TTGCCCCAGATAGAATTTTGTGTTTGAACCTCAAACAAAATGCATTCCCTCTGCTCCTCTCCCTTTCCGAGAGCCTGTG  
ATGATGTCTCATTTCCTTTCGCTTTTGTCTCTGAATGTCCATACAAATGCGTACAACTCCTCGTCAGAACTCCCCA  
ACTCTCTATGAGCTCGATGCCACCTTTCTGCGCTCTTAAACATTTCTATCATGTAGTTTTTTGCCCCAAATCTTTGGGT  
CAGAGCCCTGCATTATTCAGGGGTGAAGTTGCACTTTTCTTCTGAACAGACAATCAGAGCAATGAACCTCTGCGCAA  
CAACACTCGCAAATCTCGTCTTCAAGTTGACCGTATGACACCCAGCACTCGAAAACGATGTCTGGATATTTTTCTAG  
CGCTTCTTCAAGTGTCTGTTGGAGTTTCTCCTCTGTTTCGACGATCTTGACTCGATAATTTTCGTATTTTCCACTCGCAAT  
CTTCTGGAGTGGACATGGTTATCTTTTTTATTTCAAAGATAAATCTTTTAGTTACGCTTTTCTCTGGCACTTTGAA  
CAAAACAAAAGTTTCTCGCAAATGCATGCTGTTCGATGGGAAAGGAGAGTCTTTGTCTCGGTAATTTGCGGAGA  
TCATGATGTAGAGTTTTTCAATGTTGTCAAAGAGAGCCTTTGGGAGAAACATGGCTACCTCTGCCAGAGAAGGTTGAAA  
AGGTACGCGTATTTGTGATCGTGTATTTTCTGACTTTGAATCTCTCTGTCTTGTACTTTCAGCAGAGCCGTCGT  
CAGGAAAATCCGCACTCGGAGAAATCTCCGAGGTATTTATGGGTGTTTTATCCCATAGAAACGTTTGGTTGAAAACGT  
CTCCTTTTTCGCGCTCGAAACACATCCTGTTCTCGTCCACAAAACAAAGGAAACATTTTGTGTTGCTTTTCCGGAAGTTC  
TCGACGTCCATCTGCGGAAGTTCTTGGTAATAATCTCCCATTTTGTGTTTGAAGAACTTTCCCTTTCCGCAACA  
GATAAATTTTCAAATTTTCAATCGATTGAAGAAAGTTTCAATACATTTCTGTTTTCTGATACCAACATGAAGATC  
CGCGAGTCCAAATCTCTCTCTCCGAAAGGATTTTCAACTCTGTTGTGAAGTCAAAAGGAGAGAGCA  
ACTCGAGAAAACCCGCAAGCTGAACAAGCAGAAAGGAGCTCTGGGAAACCCCGAGGATGGAAGTCTTACGACGAAACGAC  
TCGGAACCTTTGGATAGACTTCGCGCTTGCAAACTTGCGACCAAGCAACGTCCTGTCAGAGTCAATTTGGCCACATA  
GTTCTGAAGAAAACCATCATCCACCTCATCATTCGAAGATTTCAAGAACATCTCGAGTGCATGTGTCTCTTGTCT  
TCGTCTTCTCATCACGGAAGAGGTCAGAGACCTCGGCAATTCAGGCAACAAGGAAAGGAGAGGCTAAAGGCTCTCA  
ACGAGTATTCAGCAGTGTTCGCTTGTGCAACTGTGGACAGCAAACTCCCACTTCTTCTCGAAGGATATCATCTG  
GAGGCTTGCTATACCGATGAAGTTTCAAAGAAAGGAAAGCCAGACAAGCAAAAGTCAACAAGAATCCCGCAGAGTCTCT  
CATCAACAGCTCAAAAAGCTGACGAACGAGGACTGTGTGATGCTCGGCTGAACAACCTTCTCATCGACGAGCTTGCCT  
ACAAGAACAAAGAACTGTTCCCTGTGACATGGGGCATCGCCATGCAACGCTCCAGAGTGGTTTCTCCTCACTGTTTTG  
CCTGTTCTTCTCTGTGGACAGACCTCTGTCTCATCAAAGGAAAGCAAGAGAGGACGACATCACAGACGGGTACGT  
TTCCATCATCAAAGCAAACTCGCTCTCACCAGCACTGAAACGGCAGCAGAAAGGCGAATGAAGGAAACTACCAAAG  
TCGCAAGGTTGAAAAGGACCCATACGACGAACTTCGCGAAAGGAGGAAATCTCTTCGACAACAAGGAAACAAAGAA  
ACTGTGAAGTCAAGCAAGTCCCTCATGGGTTTTCTCAAGTTCTCAAAGGAAAGGAGGAAAGTTCCGAAACCAAACTGGG  
AAAGAGGTCAGACCAACCGCAAGAAGTGTCTCACACCAGAGCCTTCTACCCATCGATGTTATCGGTGTCCCGCGCT  
CTATGGAGTCTGTGCTCAGCCAGAAAGATGTTTGTGCAAGCACTTTGAACGAATGCAATGACCTCATCGCTTCAGGA  
AAGTGCAAATCCATCATCGTAGGGGAGACCTCTCGACTGCAAAAGATTTGAGAGACTCGGTCTTTCGAAAGTGGAA  
ACCAGGAGACACTTAATCATCCCTTTGCGAGAGAGGATCTGTGATGTTCAACAGACAACCGACACTCCGCGTTGAGG  
GAATCATGTCTTTGAAAGTTCAAGTATCAGCAGATAAGACGTTCAAGTTCAATCCAAAGCCTTTGCACTCCTTATGGAGG  
GACTACGACGGAGATAAATCATTAATGTCTCCAACAGGCGGCTGCCCCATAAGTTGCGAAAACGCTTATGGGGGAAAA  
CAGTGTAAAGTTTTGCGAGAGTTGCGCGGTGGACTCTCATATAACCGTCTAGTCTCTTTCTTCCAGGACCAAAAGAA  
GAAGAGGCAACATCTCAAATTCGCGGAAACTCTAAAGGATTTGCGTACAACCTTTCAGGTAGAAATATTTGAAAGAAC  
TTCCGCTAATGGCGTTGGAGCTCCCTTTCTTCCAGTACCAAGAGACAACATTTTGGAAACTTCGGAAGGAGTAGTCTG  
GAAATATATCGCATCACTTGCAAAAACAAGAAAATGTACATCGGCCAAACGCTTCCCATGTTCTCAACCACAAAA  
ATGGAGAAGGTTTTGCTCACACAAGAGGTTTTCTCTCATGTTTCCGAGGCTGTGAAAAACAACAAGCCTTAAACAATGTC  
CTTACCTTAAACCGCAATTAGGAAGTATGGTCAAGAAGACTTTGTTGTTGAGGTTGTTGGGTTGTGAAAAGAAAGAC  
GCTGACAGATACGAGAAAGCTGCGATTCAAAGTTACGGCTCGTGTACCCAAACGTTTAAACATCAAGCTTGGAGGTC  
AACTTTGAAACACAGAAACAAAGCAGAGAAAAGTATCATTGGGCGTTCGAGGCGATGTAAAAATAAAAAGAGAAAGAA  
AGTTCTTGAACGTTTCACTTCTTTTCAACAATTCGACCCAGAAGACTTTCTCTATCCTTTCGAAAGAGATGGCAAAGTTTAT  
GGGTGGAAGTTGATGATGTTGACACCTGAAAGAGAAGTCATAAAGACAGATTTTGGTGGTTCAAGAAAGGCGAGAAACAG  
AGCAAGAGAAATGGCGATCAATTCATACGACAACCTTCAAGAAAAGGAGGGCGATGTAAAAATCCGAATATATGCGGTCC  
CAAGAAAGGACCAAAATGGAACAATCCGACGCAAGCACCACACCTCGATCTGAGACGGGTGAAGGTTTCAGAGACTAAAAG  
GGGATGCGTCTTTTCAAAGGCGTAAGATATAGTCCACTCCAACAGAGATGGTTCTTTGAGCATATGTCCTCCAAAA  
CATGGAGGGAGACTCAAGGGCAGAAAGCAGAGAGGAAATGTCTCGTCAAGTGTGGTAGGAAGGGAAATGAACATA  
CATGTCCCAAGGGGAGCGGAAAGGAGAAATGGAAGAGGTTGCTGTTGACTCCGACCAACATCGTTTTCAGGTGAGAA  
CAATGCTCCCATCATCGTCTCATTCAGGACGCTTTGATCGGAAAGTTTTCTGATGACGAAGAAGGAAACGATGGTGGATT  
GGGACAGCTTCTGCGATTGTTGATGTCGGCAGATGTCGGCAGCGTAGACATCTCTTTTGTCTGGGACACTTTGAAAAGA  
GCGGAAAAACACTATCCAGAGTTTATCAAGGATGGAATGCCCATCGAAAGAAAAACATAACCAACCTGTCTGCGAGAGCAA  
GAAGTGGTTCAACTCGAAAGAAGGTTTGTCTCACAAACAGGTGCAAAAACAAAAGAGATGTCCGCTGGACAAGCAAG  
TCACCAAGAGTTTTGCGAGGAAAGGTTTTTGGTCTGTTCTTTTCCAGAGAGGTTTTGTTACGCAAGGAAGATGTTTCA  
ATCGAAGATGGCGTATCCTCCAGAATCTGCGCTTTTGAACAGGCTGACCTTGGGCCAAAGGCGAGGAAAGTCCATCGT  
ACATCTGCTTTGGTTGGAGAGGATGAGCAAGAGTGCAGGATTTTCAACAAAACCAACAACTCACTCATCGCTGTT  
ACGCGACAGAAAACCTTGACATCGGAACAGAGGACTGCCAATCACAAGCAGGAAAGAAAGGATTTGAAAAGGAGATG  
CGAGCGTCCGTTGCACTGCAAGGTTGAACTCGAGTCTGAAAAGACTGGAGATGACCTCGAGTCTTCCATCACTGCTC  
CCTCAACTCTGTGGTAACTTTGGCCAGAAGTTGACAAAAGAGCACATTGCAAGGCGAGAGAGCAATGGATTTGAGTCTG  
CCATCATTTCTGGTCAAAGGAGGTTTCACTAACTTGTCCAGGCTTTCGATGGTTCGACAAACAGAACTGAGGGA  
GGTTCGATCAAATGTACATCTCTGGTGAAGAGGTTGCTCTTTCGAGTACGAAGAGAAATGGCCAGAAAGAGAG  
AGGTTTCTCTTGTTCATATGAGGAAATGACTGCAATCCATGCTTCTTGTGCTGCGATGGGAGGAAAGAGAAAGGCA  
TCATCGACACAGCAGTTCGGCACAGCAACTCTGGATATCTTCAAGAAAGATTTGGCCACAAGATCCAGTCAACACTGTC

AATCAGCTTCTCTCTGTGACTATGTGCGACGGCAAGGTTCATCCAGTTTATCTATGGAGGAGACGGAAATGAACGCCTCTCG  
GTTGATGAACGTGAATGGCGGTCTCTCGTTTGTGGACCCAGACGCTTGTTCGAGAACTCTCTCTTCGCGAAGAGAAGC  
TCGAAAAGCTTGGAGAGGAAGACATTGACTGGATTCTGGAACCCATCAAGCACAATGCCACCCCTGCGATGAAGAGGGTC  
GCAAAGAAGCTGAAGACTCTCCTCAAAACGCAACTGATGGGCCCTTTTGTTCCTTGTCTGGAGGAAAAGAAAACAGTT  
GAGGGACAGACTCGAGAAAATGTTTGTCAAGGCGATCGCACCTCTGGACACTCTGCCGTTATGAGGCGACTTGCAGCA  
TCGGTGAGGTTCAAACCTCAGTTGACTCTCAACAGTTTCCGCTGTCTGGCATCGGTGAGAAAAGCAGTGCTGACTGGTGT  
CCGAAATTCAGAGAGTTGATGCTTCTCAAGTCTCAAAGCACAGCTCAGCCACTGTTTGCATCGAAGCTCTGGACTT  
TGAGTTCGGCACAGACGAAGAAAAGAGAAAGGCACTCCACATTTGTCGAAGAGCAGAGGAAGGTTTGTGAGCATCGAAGAG  
TGTCTGATTTTGTGGAAAAGCAGCAACTCTCGTACTTTTCCGAAAGGAAAGCAGAGTTCCGCTTATTTGGAGAGCACGTTCA  
GAGTTCACCGACCAGAACTCTCAAATATCAGCCGAGTGGTGGGTTTCTACCTTGGAAATGACCAAAACAGACACT  
CGTTGGTTATGAAGAAAAGGAGAAAGATTGCGTTTGGGTGGTGGAACTCAAGGTCAAAGGAGAGTGCTCTACAAGTACC  
GAATGACTCTGAAAGAACTCGCCATCGTGTCTCTGATGGAGGGGATGTGGCATGTGTCCCATCGCCGACTTGTGAGTTG  
ACGCTTCTTGTCTACCCCGACTATCAAAGGAGCTTTTCGGAGAACTCGCAAGATCCGAGCTGACGAAAAGTCAAGTCC  
CATCTTCAACGACCAAAACGTCAACTTTTCTTTCGAGAGATGTCTGACTCCGCACATCTTGCAAAAAGAGAGCGTGGC  
GCGTAGAGGGAGTCCGCCCTATCTCCCTCTTCTCATCTCAAGGAGAAAAGAGGATGTTGATAGACACAGAGGGTTCAAAC  
TTCAAACAAATTTCAACACTCTCGAGTCTCCAGAACAGACCACATCCGATGACCTTCTCAAGTCTCGGTGTTT  
GGGTATCGAAGCAGCGCATCTGTCTTCTCAAAGAGTTCGAAAGTGTGAGCGGCGCTCGTATGTGAATCACGAC  
ACATCCGCATCTCGTTCGACGCGATAACACAGAGCGGAAATTCACACCCGCTTCTCGAGATGGCATCGAAGGAGCGTC  
GGGCTTTGGAGATTGGAAGTTTCGAGAAAATGGTGGACAACTTCTTACATCGGCAGCGTTTGGAGAAAAGGACGATAT  
GAAGAGTTCGCGGAGGTTGCTTCTGAGGAAACGCGACTTCTGAACGGAACAGCGACTGTCTGCTGAGAAAAGATG  
TGAAGCCCCAGAGATTGCAAGCAGCGGCGCTTCTTTCCTCGAAAATCTGGTAGAGAACGTCGCGTCCGAAATCAAAG  
CTTTTGTGTTGCTTGTCTCAGTGAGAGATAAATATATTTTGTGGATAAAAATATATACAAAGTATCAAAAATTTTTT  
GAGAAAGTGGATGGGAGAACGCAAGCATCGTTTGAAAAAGTCAAATGTTTGGCGAAAAGAGAAAAGCATTTCAAACAAC  
AAACAAGAAATGGCGCTTCTCCAGAAAATGTTTGGAACTCAGAGATAGTTTGGAAAGAAATTTGCTTGAACGCACT  
AAAAACCATGAAACGCTCCACCGTAGAGAGTCTATGAGAAATTTCTGTTCCCTCTCAAAAAATATATTTTACTTCAAAT  
ATAAAAAGGAAAACATCCAGAACTTTTGGAGAAATATTTTCTCATCTCAAATGACAGTCTGCTTATCTTGTCCGCGAGC  
GAAAAAATGGGGACGACCACTTATCAATTCGAGTCACTTCAAGTTTGGAAAGAAAAGAAAAGTTGGGAGGAGGAT  
GGAAACGTTTCCAGAAATCTCGCTGAGGCTTTCTGGCAACTACAAAGACGCAATGAAAAGCTAGAAAAGGACGTTCT  
TGAACATTTTGGCGAGTGCACCTACGGGTTTTTCTACCCCACTCTGAAGATGTCTGGGAGATAGTCTCCCTTTTGAAT  
TTGCTCTCGCGCTCACCGTCCCAAAGAAACATCTGTATGACGGAAACAGGAAGTTCTCTACGCCCGAAAAGCTCGTGGTCA  
GCATCTGTGTACGAGATCGTGGTATCGTGAGCGGCTGTGACAGTGCAGCGCCATCCGCGAAGCTCGAGTATAAAAC  
ATATTTTGTTCACAAAAAATATACGACCCCGGAAATTTGCTCTTGCCTTTTGAACGACCTTTGCACATGAAAGCGA  
ACCGCTCTGCCGAGAAACAGACTTGGGTTGAAAAGGACGCTGTTTCCGACCACAAACTTGTCTGTTTGGAGACAGG  
AGGAATATGGATGCGTTATACCTTTGAAATATCTTTTCAAATCTGGGCAGCTTGGAGTACAAAAGATATGTTGTTCA  
CGCTTCTCGCTCGCTTTCGAAAGCGGCTTAGTTGGTCAACAACATTTCTGTTTCAAAGTAAAGCTCGTCTCTCC  
CTTTGAGCAGACAAAAGAAATGTTGTTTAAACAGGTTCAGAGATAAGTGTGTTGTTTGGTTTCTGCTTCCCAAAAA  
CTCGAATTTCTTTCGTTACAGATAATTTTGGCAAAGTTGTAATACTTCTCTGTTTCTTGTCTGCGAAAAGGAAAGGAA  
GCAGATCGTTCGAGCGCTTCAAGTTAAAGTGAAGCAGCTGCTTTGGCATTTTTCTTTTGGATATTTTATCGTTAAAAAAT  
ATCATGTACAAAAGCGCACTCTCTGTTTCTTGTACACTGTATTTCTGAGGTGTTCCGCATATTTTTCCGTATACACAA  
TCGAAACATTTTGAAGATTGACACAGCAAAGAGGTAATGAGGTTTGTCTTAAAGAGTGAAGCGAAAAGCTCACTAT  
CGTTCCGTCGCTCTCTGCGTTCTATGAGGGGTTTACGTCGAGATTTTCCAAATGTTCCGCCAAATAGCGGAGAGGTTGCT  
CTTTTGTCTTTCGTTCAATTTTATATTTTGTGGTAAATATAAACCCTTGAACAAAAGAAATCTGGCATGTCTTTTGGTGC  
TCTGGGCAACAGTGAAGTGAAGTCAAAATAGCTCGCAGTCCCTCCAGAGTCTGCTCTTCCACAGGTAATAGACAAAAG  
AGAGTCTCTGTTGTCAGTGAAAAACATCGCACACAAGTTTCCGCTCTCTCGCTGGTGTACTTTTTTGAAGTACGCA  
AAGACCTCATGTTTCTCACTTTTAAAGTGGTGTGTTGGAACGACTATGAAACTCTCGAAGAGTCTTGGAGCAACA  
GTTCCAGATGGAGAGGAAAATGGACACCAGAAAACGAGAGGCAATTTAGAGAGTGCACGCGCGCCATCAAGGACTCA  
GATACCTGTGGAATGAGGTGAAAATAATCAAGAGACTTGTGCAACAAAAGAGCCATCCAGACGACATCAAGTATTG  
TCGGAGGCTCAAAAATTTGAAAGAACGAGGCAAAAACAGAGAATGGAGAGAGGGAAAGAGGAGAATGATGAGCTAGT  
CGAGGATTTTATCTTTTATGAAAAGATAATTTATGAGGGAATCAACCGTTTGAACCTTGAATCTGTTTTTGTGTTG  
CAGACTGAGAGACAATAAGCTTGTTTTTACATACGATGAACATCAAACATCAAGTTTGGAAAACACTTCTCTCTCTCG  
AAGAACTCTCTACTTTGTTGTGAAAAGAGCGGAAGGAAACATTTGCCAAAATCTGCCCTTCCCGCCATGTCAAGAAAT  
TTTCTGGAGACACTTGGTCTTGTGGCCGATTTGGGAACTTTGACGAGGCACTTCAAAGCAACAGTACATCAAAGCA  
AACATTTGGCTGGGAAGACGACATCTCTTTCTCGAAGTGAAGGACATCTTCTCTGTTGTGCGGAAAGAGAGCAAGC  
AGACCTGTTCAATCCACAATAAATAATTTCTCAAATAATTTTAAAGAGAAGAGATGTTTTCTTTCTCCCAAGTAA  
CATGACAACAAATTTGAAAACCGGAGGACCTCACCGTTTCCGAAAATTTGTCGTCCTGTTGTGCTTCTCTCGCGG  
CTGCAAAACATCGCAACACCGGTTCCATCGTTTTGACAAGTCAACGGGAAATTTGAACGCTCTTCAAGTTCTGGTTGG  
AGTCTTCAAATCTCCCATCGCGACTCCGACGGTGAAGGATCGTCTTTGGTTGCAAAAACAGGATCAGGAAGCAC  
AACCTCCCTCGGATACCTCTCTGGAACAGCGCAAGCAGCTCTGTGTTTGTGGGTTATTCGGCAGGTTCTCTGTTGCGG  
CTCTGATCACGATTGTACGGCTGTGCGTCTCTCGGCATGTGACACCCGAGTTCTTGATAGGTCAACAGCCGTCGGC  
GCAAGCTCTGGAACATCGCAGGTTGGAAAAACACTTCTGTGCGAGCAATGCCCGCAGCGGTTCAACAGGAAATTCAAA  
CGTCTGTTTTGGCTACAATTCAGGCATAAAATGACAGGTTCTGAGAACGTGATATTCGGAACGCGAGGCGCCGAGGAG  
GAATCTCGGGCTTTTCAGCGACAATGTGGTCTTGGCTTCCAAGCGGAAAGAGCCGCTACCATGCCTCTGGAACGCTC  
GTTGTTGGACAAGCTGCTTGTCCAATCTCGGACCTGTACAAAACGTCATCGTCTGCGAAGGGCAGCGACAGCAGGAAC  
TTCAAGAACAAAAGAAATGTTTCTGGGAGCTTCTGCGCTCGAGTACGGATAATGAGCTGACCATCGTCTCCCAATCA  
CACAATGGAGAAGTCTCGTCTTCTCATCAGCGGACGCGGCAACGCTTCAAGTTAATCCCGGACAGGATCATCACA  
CAGGCGGCTTCACTCAGAAAGATCAAAGAAAACATTCGCGATCTCGAAGTCGACACAAGCAAACTTTACGAGCTCGCTCT  
TAAAACGATAGAAATCAAGACGGACGGAGGGAAAGATTACGGTCTTATCGCTGAAGACACCCACGAAATCTTCCAGAGA  
TTGCTCACTCTCGACGAGAGGAAATCTCACGGCATCAAACATTTGACCCCTCGTGTATGCTCCTCGTTGCCGAACTTCAA  
AACCTCAAGAAAAGATGAGAAGCACTCGAATAAATATTTTGTCTTAAAAAATATTACATGTCTCAAGCAGCGCTCTCT  
CCGCACTCGCAAAAATTTTGGGAAGGCGGCTGCCCTTCCAGCCATGGAAGTATCAGGTCCTTGTCAAGAAAAGGCAATC  
ACAAAACATCGTCATAAAAATTTCTTGGACCTTTTGTTTTGGAGAGGACGCTCTCTGTGCTGCAACGATAACCTTCT

CAGCAACTTCCGACACAAAATCCGAAAGGGAACCTTGCTTTGTCTTTTAAAGTAGAGTTTGTACCATTCCGTTTTGTGCG  
CTCAACGACAGGACTTCTTTTCTCGTAAAGTTCAAAAACGCTCCTCATCTTCCATTGTTGCTTTTCCGAGAAAGGGTGT  
TTATTTCCAAATTTAACGCATGAATATTTGTGGAAAGTTTCAAACCATTTATTTCTTCTGAGACGAAACGACTTTTATGCG  
GCGAAATTTGTGGAATATTTATCCTTTGAAATATGTCTCTCGCTTCCAAACATCATTCAGACAAACGAGAAATTCGACCT  
GGTGTCTTCCCTATAGAAATGGAAGGGGCAAGCATCGAGTTTCTTTGCGACTTTGGAGACAAGCAGACGTCAAAACAGGA  
AACTCTCCAAACTTTTGGCAAAGGTCCTGAGCGGCACAACGTATACAATCTCTTCAAACGGCAACGATGGTGAAGTAGAG  
ATTGAACACGACGAGGAGGAAGGATAAATCTCTGTCAAAGCTACGGAAGCGTCAGAGGTTGTCTCAGCGTTTCCCTTGC  
GGCAGAAGCTTGCATCTTGGCCCTTGAGAATGCCATTAGCGAGACATCATAAATATTTTGAATAAAAAATATTTTAA  
AAGTCTTTACAAAATAATTTCTGATGGATGCTTTCGAAACGTCACACGCGAGTTTGAACCTTCCACAGTCCACAGAGA  
AAACATCGGGCTGTTCTTTAAATTTCAAGGATAAAAAGCACCTTTCAAACCGGACTTTTCTTTTATAAAATTTGTTCTT  
GCTCGTTCCTTAAATTTTTCATGGAAAAAAGAGCACATTGGATGAAAACAACAGGTCCTGAGATAAAATATTCTTTGT  
ATATTTTTTTGTAATGAGCAGCACATAAATCTACCATAAAAAAGGAGTTTGTAGTTTCTCGAAACCTTGTCTATTTCCCG  
TCTACAAAATCTCGCGGAGCTCCAGAGCCCTTGGTGGTCTATCGCTACAACGACGAGCGCAAGGCGTCACTCG  
TCAAACGGCTTTCTTGGTCTTCTCTTCCGCAAGTGACGAAACGCGCAGCAGGAGGATCGTCTTGGTTTGGACTTC  
CGTTTCTCCAACGACCAACAAGCTACGGAAACGGAAGCGAACCCCTCCAGCGGCAACATCTTCTGATAGGATGGAGGT  
CAGGATTTAGCAACAACGGTGCAGCAGGATCACAGCCGTGGGCTCTCTCGTGTCTCAGGCACAGACAGTGACG  
AACAAAACGATGGTTCGAAAGGTCCTGCGGAAATCAGGAGCTGACACAGCAAATTTCCACAGGAGTCGAAAGCACAGGAT  
TACGTCGGGCGCATCTGGTTCAAACAACCTGCGTGTGGCCAAAGCAGCCAGAGCGTCAACGTCGGCTCAGGAACTCGT  
GGATGGGAAACGCTCTCTTGGAGGACTGGGGCGCCACGTCACAACAACAGTGTAGGGATAGGTTATCTCTGTTTGTCA  
GGAGGAACTGCCTCTTCTGGCATCGTCAACATCGGAGCGGCTCCGGAGGGGCTTTTGGAAATCCAGGCTTCCACAGA  
CGTTTCTTTCATCGGCAACGGGACGAGTCTCTCTGCAAAATACAACAACGTCGGTTGCTTTGGGAGAGGAACTTTCTG  
GCGTCACTGCAACAACACGCTCGGATCGCAGACAACGTCACGCAATGGAGGTCCTCGGTCTCGCAGCTTCCGCTTCC  
GCCAACGTTTTCGAAATTCGACCTGTCAACCGTTTGGTAAACAGGCTGCTTCTGTCACAAAATCAAACAAAATATTTTAA  
AACTCTTTGGAAAGTCAAAGTTCGACATTTGACATATCGAAAGTTTGTACATAAGAAATAGATGGTCAAACGACCCAG  
GAGTAATCTCAGAGGAAATTCGGAAGTACGCCACCTTGTGACGTCAAAGGGCAAAGGAAACGCGTCAAGATGTTGAGG  
GTCATCATGTCCCTTCTTTCAGAGATCCAGGTGTTGAAAGCAACATTTCTCTGTTGAGGAGAACGCATAAAAGAGAG  
CAATTTCTTTCTCTCAAAGAAAATCAGAAGTAATATGACCACAACTTTGAAACTCGCAGGGAGCTTGTCTGCTCGA  
AAAAGTTTGTCACTCCCTGCTTCTTCTTGGCCGCTGTCATCTGACGCGACAGCAGGTTCCATCGTTTTCGACTTCT  
TCCGGAAACATGAACGTTTCCACAGGAGGCGATGGTGGCTTCTGGCTTCCAGCCGACTGGCAGTGTTCGAGGTC  
CGTTTCTCGGTGTGACAGATTTCAAACATCGGAGAGACGACTTCTCTTGGATACTTGTCAAACAGCGTGGTTCTCG  
CCTTTGTTGGTACCGCTCTGAGAGCGGTGCTGGTGGCGTCAGCGATTGCACTGTGTGGGTCAATCATCCATGTCAATC  
GCTGGAATCCGCCCTCAGTGTGTGGCTGTGGGTGTCAACGCTGGAAGGGCGGTAGGTTCAAACAACTCTCTGTGGTGT  
CAATGCGCTCAACGAGGACAGGAAGCAACAACATCTGCTTTGGCTTGGGTGGGGCCAGGGCATGGCAGGCTCTGGAA  
ATATTTTATGAGGCAATGACAGGAGCGAAATGTTGGAAAGCGTCAACAAACAACATCGTCTCGGCTTCCAAAGCAGGA  
AGGCGAGGAACGCGGCTCTGAAACATCGCATCGGACCAACCGCTTCTCCGGATCTCGGAACGACAAACAACATGTAT  
CAGCATCGGCTCTGCGCGACTTCCGGAATCTCAGAACTGGCCGCTCGCTCTCGGAACTTTCGCGCTTGTGGTGTGCG  
ACAATGAAATGACCATCGCTCCCAACAATCACACAATGGAGAAGTCTTGGTCTCGTGTGCGCTGCCGCAACAATTTG  
CAAAATTAATCCCGCAGCGGTATCATCACACAGGCGGCTTATCCAGAAAGTTCAAAGAAAACATTCGCGATCTCGAAGT  
CGACACAGAGAAACTCTCAGAGCTTTCTCTCAAACGTACAACATCAAAATCAGATGGGAAAAGGACCATGTTCTCATCG  
CGGAAGAGAGCTTTGACATCATTCGGAATATCGTGACGCTCGACGACAGGACAAACCGCAGGCAATCAAACATTTGACT  
CTCAGGATGTGTTGCTCGCGAATTAACAAGTCTCAAAGCTCAGGTTCAAGAGCTCCAATAAAATATTTTCTCTGATAA  
ATATTTTTAATGAGTAGCACATCAAATCTGTATCAAAGAGGTTTGTGTTCAAAGAGATTGGTGGTTCCGGTCTCT  
TGCAACCGCAGCAGCAGCCACCGTTGCGACGCGCAGGTTCCATGCGTTCGCAACACAAACACATCTCTGTCTGCTG  
GCGGTTCAAGCTGGGTACGCGGACTGCGCAGCGCAACCCGACGGTAAGAGGAACTGTTTTCGGCACACACAAAGT  
GTCTCTAATGCGTCTGTGGTCTCGGAGCAACATCGGCGTGGCACTGGAACAAACACTTTTATCGGAAACAGAGCGGG  
AGTGGGAAATGCCATCGGCCAACTTCAATGACGGGTGTGGGAGAACAAAGCTTTTTTTCGACTCAGAACGTTGTAACA  
AAACTGTCTCGGAAAGAGCGGTGGAATCTCGGGTTCGATCGGACAACTCGACGGGAAATAGGAAATTCGCTCTCCGT  
ATCATGACTTCAGGTTGAAACAACATGCGCTGTTGGCACGGAAGCTCAGTCGACCACAACGGGTTCCGGAAATGTTT  
TATTTGAGACCTTACGATGAGCCCGCTTTCGACGTCGAATTCGACAAACAGTGTGCGCATCGGCCACTCAGCTTTCCT  
CTGTGTTGACCAGACCGCATCTTCCGTATCAACATCGGCTCTGGAACAGTTTGGTCTCCAGGAAACGACAGGCTCAATA  
GGTGGCCAGTTCATCGGAAACGAGGAACTTAAACAACAACAACGCGGAACTTTCGCCCTTGGAAAGTGGCGGTTTTCG  
AGGCACAACCTCATCAACAAGTTCAGGTTTTCAGACAACATCACACAATGGAGGTTTGGGTTTTCGAGTTTCCGCT  
CTGCAACGTTCTCCAATTCGACCCAGCCACAGGTCATCACACAGGCGCTTCTGTCAGAGATTTCAAAGAGAACATC  
GGAGACGCTGAAGATTTTTTCGAGGATATCCTGGAACCTCAAAGTTTGTCTTATGAAATAGATGGTCAAACGACCCAG  
AGTCATGCGGAAGAGTTTCTGAAATTTTTTGGCCACTTTCAGCAGAAAGGCAAAGGAAACGCGTGAAGCATCTCTCT  
TCACGATGGCCATTCTCTCAGAGATTCAGAACTTCGAGAGCAAGTAAAGTTTTCGAGAGAAACAAGAGGATCTAAAAT  
ATTTTTATAAAATATTTGGTATACAGGACATCAGAAAGTTTATACATTTCTGTCTTCTCTGCGAGCGCTTCTTTT  
GGGGCAGTGAAGTAAACAAAATAGCAAGTTCAAACCTTGAATTTCTTTTTGTCCGTGAAGAGAAACAACAAGTAGCCAAAGAA  
ATTACGGGTATCCCAACAACAAGAGCACAAAAGTTCAAAGATCGCCGAGACTCAAGAACGAAAAACGTCGTGGGT  
GATTTCTGTTGGGAGGATCTGATTTTGAAGCGAAAGAAATTTCAAAGCCCTTGGAAAGTTGATGTTTTAAATAT  
TTTTAAGAAATCTCTGAGGTCTGTCTATAGATACGCCGATGATGACGATGGTGAACAGAACAGAAACCAAGAAAG  
GGCGCCAGCAAGAAACAATAAGCAAGTTCAAACCTTTCATTTTGTAAATGTCAGAAATAGTCAGATACTGCAAGGGCT  
TCAGATCCAAAATCCTTGAATCTTCTTTCACGCCCCTACCGAGGAAACGCTCAACAGGAAACATTTTCTGTCACAAA  
ACACAGGAGACTTTACGTTTCGAGATTCGAAACGCGCAACTCTTGTGTGCGCGGCGGAAGTGTGCCATTCGACCTTCC  
TATTACATCTCCACAACAGGTTCTGACTTGAACAACGCTCCTTCCCTTTCGACTTTTTCGAAAGGCAATTTGA  
AACGGCCACGAAAGAGGTTTGGATGAAACACATGTTCCATTTCTTCCCGGAAAGCTTTCAGATCGGGGATGGAGCGA  
CCCTGAGCTATGCGGTTTTCAGGGGTACAAAACCGGTGCTTTGACCATCTATGGAAGTTTCGACACAGTTGGTCTGCTCA  
GTCGCGGGAGCGGGAGCGTTTCAATCCGGCGCTCATTAACCGGACATGACATACACTCTTGGCGGGTTGACCCCTGG  
AGCGCTCACAGGAAAGTTTTTGCATTTCTTCCACATCTCAGCATATTTTCAGACACATTTCCCCCATCTGTCAGAC  
ACACAGCGGAAATCATCAGCGTCTCTTCTTTTTCTTCTTGGCCGTGACGGCAGCAGATACTTTCGAAAGTCTGAAAGC  
ACAACACAGCTGATAACCGACCAAGCGCTCCTTCTGTGACGGTAGACAGACTATCATTTTTCAGGATGTCAGATAGA

CTCTGGTTCTGCGAGCTTCAACTCCACCATAAGTTTGATAAAATTTCCAGGCATGCTATCTTTCAAGCACAAATCCAGCGA  
CAGAAGGCTTCAACTTTAGCACATCGAGGGTGGTGTTCACAGACATCGTTCGTCTTGTCTTGTATCCGTTCCAATCAAATG  
TTTGGCAACGGTTCCGGTGTGTGATGGGGCGATAGTAAACCACAGTTTTCGAGCTCTCGATACATTTGCGGGAAATTTTGT  
GATAAATCTGTAATATCTTTGAAAGCTTCGAAGGTTGTGATCCTTGTGTCATGGTCAAATTCGAAAGTTTGTGACTG  
CAAGTTCTACCGGAATCATCACTGGCAAGTTTCATCGGGCAACGACCGGGTCAAGCTCAACTTTTCATCAGCGGTTCCG  
GCGGGCGTTAAACATCTCACAGGTCGCTTTTTCGAGCACTCTGGCATTTGGTCTTCTCGGCCAAAATGCGAGAATAAACG  
CGAGAGTTGCAGTTTGCACACGTGTGGCTTCGGAATCTTTGGTTCTCAGTCCGACCTGTTTCGTCACAAACAGCAGTTTCA  
ATGCTTGTACGTCACCCATGTCTTTTGAAGGGCATGCAAGGTTCTCGTTGGATAATATTTCTGGAACGAACGCGGGCTCA  
ACAGTGTAAACACTTCGCAAGCGAAGCAATGGAGTGGCAACAAAGTTCTGTGACTATTTTCGGGACTAAACGACTTGCAAAAT  
TGGCTCCAACGCTGCCGTTGCTTCCCCAGGTTGGCCGCTTTTGGTTCGCGGAGGGTCCGCGCTTCTGTCTGACTATGGCG  
CTTTGAGCCCACAATTTGACATGCAAGCCGTTCTAAAATCTTTTGTCCATGGCTCCAGAATATTTCTTTCGCAA  
AGAAATATTTACTGGCCCTTCTCCACCAAAAATCCATCCGATTTTCAAATACAGCAGGTCGTCTGGCATGTCTC  
CTTGATGTTCTTTGCAACAATGGTAGAGCGGTTCTCGACTTTGTGAAATCCCATTCGCTCGGAAGGTGCAGAACGTTT  
GATCTGTGTTCTTACAATAAAACCTTGCAGGAGCTCTCTTCTCGTAGATGGCGAGAATTTTCTACCCCTTCCCGTA  
AGAGTAGATGTCTCTGAGCCGTTTCTGTGTGTGGACATGGTAGTTTCTGTCTCCGATATATCGCACTCTGCGAGAAT  
GGCCGTTCCAATCTTTCGAAAACCTTTGCTGTCTGTCTCCAGATTCGCGACACGTTCCCGTTTTTGTAAAGTCCCGG  
ATTCGACGAATCCGTTCTCGAAACTGTCTATATGAAAACCGGAAAGAACTCCGTTGAATAGGTGAAAGCTGTGGCTTT  
TCTCCAAGAAAAGTAAAGCAAAGCCGTGAAGCACTCCAGCAGGAGAGATATGAAAACCCCTTCTCGATAGACAGAGG  
AAGATTTCCATCTTTTTCGCGAAGCAAGCGCATGTCTTGTTCGCGAATGAGCTGATGATAGGTGCAACACGTTTTCGCAA  
AAGCGTTGATGTGCTTGCACAAAGGGAGGAACGAAACGATGTGAGAACCATCTCGAGAGGAAGATGTTGAAACTCCATA  
TTTTTTCGAGTGAAGAAAATTTTCTCCCGAAGGTCATTTTCTTTCGCAAAAATATATTTGAGATGACAGCCACA  
AAAAGAGACTGTTGTTGCGATGTTGGCAAAGGCTTGGTCCATCCACAATATTTCTCTTTTGTGCAAAAGGGGAGAAGACG  
GGAAAATCTTAAGAAATCCGTTTCTTGAGGAACGACAAGGATTTGATACATCTCTTTGTTGGTGTCTTCAAGAAGGGTGC  
GAGAACTGCGAAAAGAGAGAGGCAAGCAAGGAAATGTTGAGTGCAGAAATGACAGTGTCTGAAAATAAAAAGATG  
CTATCTTTGTGCCGTGATAAAAATTTTTAGATATTTATAGTTGAATGCCGTGCTGCTGAATGATATCGCGAAGAAATC  
GAGTTGTTGCCCTTTGTTTTCAAAGTCTTCTTTTCTTTTGAACCTCTCTCTGTCTCTTTTTCGGGTACTCTGTCTGCT  
TTTTTAGGATGTCTTTTGTGCTGTTTATAAGAATCTCTGGCAGTTTGTCTCACTTTTCTCTGTTCTTTTCTCTGTAC  
CTTTTTGCGGCTTCGAGATGGGCTTTTTGGCCTTCTCTCTTTTTTCAGAGGACATGTTTCATCATGTATTAFTACTCAGGG  
ATGTAATACAATTTTTATCATCAAAGAACTTTGATGATGATATTTAAAGGAAAAGAAACGAGCCCGTAATGGAACGTC  
CCGGACAAGAGATTTCCATCACAGACTAACGATACCTTCTTATCCCTTATACTTTTTGCGAGCCCAAACCTTCTCT  
CATAGAACATGCCTTATTTGCAAAGAGAAGTTTCTCAGACGAAACAAGTCAAGAAAATTTTCGTTCAAAGAACACAT  
CCAGAAATTTCTCTTTCGAAAACAACCTCCCTCATCAAACGCGGAAATGGTGGGATTTGTTGCAAGGAGAGAACGAAATC  
AACATTTTTGAGGATGGATATCGCAACGACGATCGGCTCTCTCCCTCGTATATCAAGTGCATCTTTCGAAAAGGAATA  
TTATTTGCGGAATCTCTGGGAAGTCACTCCAGAGATTTTGAACAATGGGAATTCGTAATCTTTGATATTTCTCAAGCAA  
AGGTTTTCCAATTTCACTCTGCTTCCATACATCTTCTGCAAAAATACGAAGAACAAGATACTCCGTTTTTGTATAGACA  
TTCTTCTTATATCTGTCTTTCTTTTGTGTTGTTCCGGGCTTCCAATTCGATACTTGTGTAGTGTGTAATACCAT  
CCAATTCATAATTTGTTTTGAAACACAAAAGTCAAAGGAAGAAAAGTGTCTTTTCTGGGTTCTGCAACCACGAAGTT  
CTGAATGATGAACCGGTTCAACAAATGTTCTTCGAGAAAAGAGAAGAGCTTCGCTTCGGTCTTGTTTTTGCACTTGGG  
ACACCACTACCGGAAGAGATGTTGGTGGAGAGAAGAGCAGAAATTTGTGTTTTCTTTTCGCATTGCAACCAAACTTTTAC  
GTGAACCTGCAACACCTCCCTTGGACTTTTCTGTTTCTTTTCGGTCTCCAAAACCTTGCCTTGTGCGGAGGAAGCGAAG  
CTCTTTTCAAAGCACAATTCGCAATCACTTGAAGAGCATAGTTTTTGGTTCGAAACAAAAGGGGCAAAACGTCCTCGTTCGA  
GACGCTGTCCAATCTTGTTCGAAGCCGTTGTCGACGTCCTCCGATCGAAACCAAACTTTTGTAGAACTTGCAAAACA  
CCTCCCTGGACTTTTTTTGTTCTTTTTCGGTGTCTCCAAAACCTTGCCTTGTGCGGAGGAAGCGAAGCTCTTTTCAAAGCAT  
GTTCCGCATTCAATTTGAAGGACAGAGTCTTCTGTTGCAACAAAAGGGGCAAAACCGCCATCAAGAATGTTATTTAATGT  
CGCTTCAAACCTGTGTTGCAATTCGACCTAAACCAAACTTTTATTTGAGCCAGGAACACTTCTCTGGGACTTTTCT  
CATCTCTTCGACACTCAAATTTTGCCTTGTGGAAGAAGCAAAGCTTTTTTCAAACACGTTTTCACATTCGTCCAAA  
GAGCAGAGTTGTTTTGTTTCGAGCAAAAGGGGCAAAACTCCATTCGAGACGTTGTTCAAATAGACTTCAAACATGTTT  
GCATGTTCCGATTGCAACCAAACTTTTTATGCTGGTCTCCGGTATCAAGAAAGGGCTTCCATACTCTTTTTTTCAGAT  
ACTTTGACTTTTTCATGCGAAGCGAAACTTCGTTTAAAACAAAACCTCGCATCTCTTTTCCACAGAGTCTGCTCTCTCT  
TTTTTTGTTCCACAATTCATCTGTTTCTTCTCTCGTATTTTCAAACCAAAACATTTGTTCTTCTTTGGTTTTTCGAAA  
ACACAACAATAATTTCTTTTTCGAAAAGAAATATATGGAAGGACGCTCCAGGATGATACGTCATGTAGATACCGGATTTG  
CAACTCTGTTTGGTTCTTGAAGTGGTCTCTTTCGAAAGAAGAGTTCGACGAAGGCAAGAACGTCGAGAGGAGAACAGAAGC  
TCAAAGGACCACAATATTCGCTCATCTCTTTCGAGAGGAAGGTCGAATCTTTGCAATGTTGCAACTTCTTGGTTTT  
GGAGGAGCGAGAGGTTTTGGAAGTTAATCTCAAGGAAGAAAAGACCATTACCAAGAAAATATATTTCTGTGGGTATCT  
TTACCGTTAAGTTTCGGGTGAAGGAAGACCCACCAAAATGTGTTTTGACACTTTTCTATATATACGGGCTTCTCTTAC  
CCTCGGAAATGTGGATGGACTATCCATAAAAATATCAAAAATATTTTATGTTTCTCTGACCAAAAGGAATAAAAATTT  
TCCATCGCTTGTATTTCTTCGCCAAATCTCCAGGTGGCACAATAATTTGACAGAAAGAGAGAAAATTTTCTTCTGTCTG  
TCTTTTTGATGGTGAACCCGAATAAATACTGAGCTGCTCCGTTCCGCTTCCAGCACTCTCAGGAAAATTTCTGGCTTGTG  
GTCCCAAAGAGGCTGACGAATATCTTTGCTTGGTTTCTCTTCCAAGCGCACACTCTTTTTGATATATTTTTAACAG  
GAAAACACACAAGCGCGAAAATTTGTCGGTCCGTAATAACATATGATGATTGACCCACAAGTTCGGAATATCTGACAAAA  
AGTAACGAAAATTTGCCTATTCGTAATAACATATGATGATTGACCCACAAGTCTGAAATATCTGATGTTCTCGTATTTTT  
TGACATATTTTTCTTCCACCTCTTCAAATTTTTTTCGAGTGAATTTGAAGTTTTGTCAGATATTCGGAACACATGG  
ATGAGTGAACCACAAGTCTCTGTTCTCATGTTTTTCTTGTCTTTTTTGTGAGATATTCGGAACCTGTGGTTCAATCAT  
CCACATGTTTTCCACATCAACACAAGTTTTCCATTTTTCTTTGCGCTCTCTTTTTCGAAATTTTTCGAGGCTTTTTTCCA  
AACCGTTGCGATTTGGAATGTTGTAACCGTTAGCCTGTGCCCCAAGTCAAAAATCTTGATATACTTCCGAAGCAGA  
GAACCATCTTCTCATCTTGTGTAATCTCTGAGAGGACTTCCAAAAGAGCTGAGAAAAGCTTCTTTGAGTTGT  
TTCGACATTTCTTTTCAAAGAGTCTCTGGAATGTTTGTGATGTTCACTCCCTTCCAGTCAACAAGGAATTTGATAAAA  
TGTCTCGCTCTTTTGTCTGAACAACGGAACATCGCATATCTCTGTCGACTGTTTCGATCTTGAATGAAAAGGTTTAT  
TGTGTTCAAAGAAAAGTTCAGAACTCTCTCTTCTGGTTTCACTCCCTTTCGCTCAATCTGGACGCTTTTTCCG  
TGATAAGATGTTTTATTACGTCAAAGGACTTGTGATATGCTCCAGCGTCAACCTGGTTTCAATTCACAGAACGACCAAA  
AGTTTTCTGTGCGAGACAGAGTTGAAACGATGAACACCCCTCTCGATGCTCTCGATGCAATTTGCCAAGTTTTCTCCAAA

GACTTTGTCCAATAAAAAAGTCTGTAATTATCCCTTTCTGCGCCTTGGGCTTCTACTGAGAATGACAAGGGCGACACCAG  
TTTTTCTCTTGGATTTTTGATGATATGCGACAGCCATGAAAGGATATATTGTAATTTTTCTTTGAACTGTCCGCCCAA  
ACTCCGAATAGATGGTCGAGAAGAGGTTGATTTTTCTCTGTGCGACCCCTTCGTGACAGGTTGAGCTTTGAAACCCCTC  
GAATGTGTTGATGACTCGACAGGCAGACGGGAGTCATCTTCTCTGGAGAAAAAGGGAAGAAAACAGAGTCCGTGAAACGG  
TGAAGTCGAGATGATTCTTGGAAAGAACTAGCCAGTGAATGGGGAATAGTCTTTGGCGCCTTCCACTTCAAGAAAG  
AATTTCTCGCTGCGCTTTTGACGAATGAACTTTGTGAATTTGAAACATTCATCCTTGTGCTTTGACGACAACCGTT  
TCCGCTCCCAGGCACATAAGCAAAAACACGCCATATTCGGGATGATATCGTCCCTCATCTCTTGTCTTGTGATA  
CTTTCCAGAGAAATCCATCGAAAAATTTGCCAATGCCAACGGTCGCTCGGGTCGATGAGACAAGGTAAAAACCCATTT  
CTCGCTTTTTCTCCCTTCCAACAAGAAGGATTTCTTGTGTTCTCGTGTGTTGTTGATGAACGACATTTGAGCCAAGT  
GTTTCTGGTCCCATCGAAATATAGGGAGAGTTGAGGTTGAACTGTTATCGTGCTCTGTCGAAAATGGGACAATGCC  
AAGGACAAACCATTGAAAGTTGAGGAAAAGTTGCTGTTGTTCTGTGTCATCCCTTGTACTCGAGGCTTCTTCCGGCT  
CCGGGAAGTTGTAGAGTGTTCGCAAAGCTTTCCGCTCCCGTTCATCGGAAGGAGGAGACAGCTCCTGTGTCATGCATAT  
CCTGGGAATGGAAGAACTGCCCCAAGAGGGAGTCTTTCACACCCCTCGACATCAAAAACAAAAGTTTTGATCTTTGG  
TGAGTTTTCTCTGATGGATTCCATACCCCTTCCCTTTCTTATGCATCCTGCGAGTCTCAGGCATTGCCATGAACTGTAG  
ACTCGTGTGTCGAGAAATTCGTATATCCGCTCTCCTCTTTCTTTCAGGGAAACAAAACCCCTGCGAGTGAACCTTTCCG  
ATCTCCTTGTGAGAAACAATAGGTGTTGATGTACACATGGAAGCTGCTCTTATGTTTGTGGATGAAGTAAAGGTTG  
AAAACTCATCGTCCGATCTTTTGAACAACCTTCAAAAGATATACCTTATTTCTGAAATCACAGCAGCCAGAAAT  
TTTTCTCCCTTCTCCTTGTTCGTACCTTTCTTGGAGCGTCGATGTCGAAATACGGACATCTCAAGACAGAGCCCGG  
AATCACCCTCATAGAAATTCCTCTTAAATGTCACAGCTTTTTGACAAAACAGAGTGCCTCTTTCTTGTGGAGAAAGC  
AGCAGATTTTCTCCCATCATGATGTCCTTTGCGACGATGACAGCAACCCCTTTTCGGTCTGAGTGACCTTGTTTCA  
AAACATTTGCGGTAAAAACAGTAGAGATAAGGTTTGTTCACAAACGACTTTCCGAATACGGACACTTGAGTTAGAGTTT  
AGTATGATGAGAGTCGGCTTTTGAAGGATGGCGCTCATTGTATTGGGATTCTCAAGCCTTAAATACATGTCATAAAAT  
TTTTTATGACATAAAAAACAGCAAAAAATATCAAAAGTAAACACATCAAAACAGAAAGAAATGTCCAAGAGCACCCATGAG  
TGGCAAAGAGAGTCCAGAAAACAGGAGAGAAAGCAAGTACAAAGTACAAAGGACAGTCCAAAGCTTGGTATTGGAGAA  
ACAGGGATGCGGTATAGCAAAGAGACTTGAACAAACAGGAGCAACAAAAAAGATGGAGGAAAGAAATTCAGGCGCAAAA  
GAGGAACTGGAGAGGCTTCGCTCTCTCGTTGGTCAAAATTCGTAATAATGTTTTTCGAGCGCAAAAAGATATTTGACGTC  
CTCCTTGAAGGTTACAGCAAACTGGAGTGTTTTACACCGCCGCAACTTTCTAAAAATATTTTATTACAAAATATTTTT  
ATGTTCTCGGTCTCATCTCCGCTCTCAAAGAGGAAAAGCTTCGAAATAGTCCAAAGCTCGAACTCTCAGATGGTCTTTT  
TGAAGTGAAGAACCTTGAACACGCACTTTCTCCAAAGTCGATAAAAAACATCGTTCTCGGAGGCTTGCAGATTTCTTCT  
CAAGAACTCGCTGCCACAGAACTTTAGCACGGAACAGTGAGTGTATTCCTTCTCCAGTTTTACTGTTTCTCCAGAACCA  
CAAAAGTCTGCCAGGTTGAATGTGAGTGAATATGTCAAAGATTTGGTGGAGGAAACAAACGTTGACTTGTCAAAC  
GGAAAGCGAAAATCTTCTCCTTGTATCCCCCCCCACCCTTCTCGAGGTCGTCTGTGTTCTTTGGAAGGTGTTCTCTC  
GTTCTCCAGTTCCGATGCTGCTGTCGAAACGACAGTTCATATCTCTTTTTCTCCGACAAAAGAAATTCCTTCCGTTAAC  
GCATCAAAACAGAACAGAGAAACCCCTGATAAGATGGAGTTCGAGTCTTTCGAAATCCGCGACTTCTCGAAACGGACAA  
AATCTGCGGATTTTCCATATGCTTTTTTCTCGAAGAAAGGACTGGATGTTCTTCCACTTTGAAAACGTTCTTCGCGTAA  
TGCGGACATGTGACAGATACACAAATCTCCTGACATTTTGGGTGTGAAAAAAGTCAAAGGAGTCGCAATTAATGTTCCA  
TTTTTGGTGCACAAAATATTTTTAAATGAACTTTCTCCCCACCCAGGACTACATTTAAAAATATGAAAACCTCCAT  
CATTTCAAACATCATAAAATTCCTCGAAGAAAGTTTACTTTCTTCTCGACAAAACACTCGTTATCAATGAGCGCGAGCTA  
TTCTTTCTATCGACGGGAGAGCTTCAATGGGTTCTGAGGTAACATTTTCCGGGAGAGAAACACACCAATATTTGAC  
TGCAAGTGGGAGAGCAGTTTGCAGCGAAGGAAAGGTTTTGTTTTTATCAAGGGAGCGGCTCATCCCCGAAAGACGAGGC  
GATTAATAATATCATCGAGAGTATTTCTGTCGAGTTCATGGATAAAAATGCCATTTGAAAAGCCCTCTTTTTCTCGAAAAGA  
AAAATAACAAAGAACTCAGGGAAGAGAACGACCTTCTCTAAAGAAAGATTGAGCGTCTTCGACAAAAGAACAGAGAGCTC  
AAATACGCCCCAGGAAACAAAGGGGCTTTGAAACGCTCAGCAACACTTTGAAACCTTTCAGGAGAAATAACGGAATTTGAC  
CAGCTCCAGTCAACATAAAATATTTTATGAGTCATAAAATATCATCCATAGAAATTTTCCGCAATGTCGAGTTGTTTCT  
CGAGATTTCAACGAATTCGATGCTTTCTTGTCTTTCGAGGTTGAAAGTCAAGGCCAAAAAAGTCTGTCATTTATGGATA  
CCCAACACTCGGTTGCAGAGGCTCAGTTCTGAATCTCTTTGTCAAAGTCAACCGTCCGAAATCCTCGCCCTTGTGAAA  
GCATTCGACAAAATCTCTGAGTTTACCAATGAACCTTTTTCGAATCGCAAGATTTATTTGACGCTAAAACGCAATCTCT  
CGAATTTTTGATAGATATACAAAACCTTGTGCAGCTCTCCCTATCCACAACAGCAGAAATATCCTTGCATATTTTGTGAG  
AGAAATAATACTTTTTATTTCTCCACCCGTTCTGTTTTCTTTCGTTCTCGTTCGCAAAATACTGCGAACAGAGAAATGA  
AAGGTTCTCTCAAATGGAACGCATTTCCCCGGCACGTTTGGAAAATTCGACTGCCTCTCCGCCATGAAGAAACAGGAAGA  
GCGCCACTCGAAGCTTTTGGAGGAGATGAGAACCATTTTGGAGACAAAACATCGTCTTTTGTGAAAATCAAAACAACTGT  
CCCACAAGCTAACCAAGAAATATGTTCTCACTTCTTCTGTTTCGAAATGGACGGTGTGATTTCAACGGTGTGCTCTT  
CACCTATTCGATGGGTTGTAAAGACCGAATTTCTTGGCAATCTATGGAACATTTGAAGAGACGAAAGAGCAGTTTCAGAG  
CTTTCTTGGGAAAGGCAAAAGATGGAAAATTTGCTCTCGTCGAGTTTGAAACTCGAACGGCGACTTCTCAATCACCCCA  
CAATAGAGGAAAGGCTACTTTCAGCGTCTCAAGTACGGAGGAAACGGAAGCGGAGACCTTTCTGTGACTTCTCTTTG  
AATTGTGTGTCCTGCCCCTTGAACAGTTCGCTTCATAGAAATATTTTTGCTGGATAAAAATATATCTGAGATTGGAAAA  
GCTAAAATCTTCTTTGACTAAAGGCGGAAACATTTGCGGTTTTTAAAAAAGAAACGTTTCGCATATTTTACTCACATAAA  
ATATGGAACAAAGCAACCAAGTTTATCTCAATGCGACTCACCACTCGGCAATGTTGATTTTTCAAGTCTCCTCGAAAGAG  
GAGGATCGCAGATGGGATTAAGTTCGGCTCAAGAGCTCTCCTTCGAAACAAATCCCACATTTCCGCGTTTGTGAGGAAG  
TTTGTCTGTAAGGAGAAATCTGGATATGTTCTTTTGAACGGAAATGTTTTTGTACTTGTTCATCCGAAGAACACTTCT  
CTTGGCAATAAGGCATGTTCTATCAGAGAAAATTTGGGTTCAAAAAGTATAAAGGGACCTGAAAAGAAAATTTCAA  
AATTTTGAAGTTTTCGCAACTTTTTTGTGTCAAAATGTTGGAGAAAATTTCCGCTCGACAACCTTGTGCAAAATTTGGTT  
ACCTCAACATCGAGGACCTTTCGCGCAGTTGACAGAAGTACAGAGCTCTTTCAGTTTGCATGCGCCCAAGTCTATCTGAGG  
GATAAAAAGCACCAGAGACTTTCCCTTTTTCTCAAGTCTGTCAATCAACAAATGAGATGGGGCGAAAGGTTGGTCTCCCC  
AACCCATATCAGCCGATGAAAGAGCGGAAATCAAAACAGAGTTCGGAGAACCCCTTTGAGGTACCAAAGAACGGGA  
GAGTCSAAGTTGAGAAAACCTCGAAGAGAGACAAGCAATAAGACTGTGAGGAGACCCCTTCCAAAGAGAAAGGAAAGAA  
AAGAACAGCTTTTTGTACGACCTTTGGCACTGCAATCAAAACGACACTTTTGGGCGAGACAGGCAATCCTTGGGTCTA  
TAGACTTTTGAAGGAAACTGTTGATGATGACCTCATCAGCAGAGATTACTTTTTGCTTCAGGACAACGGTTTCTACG  
ACTCTGATGAAAGGCAATTTACGTTTGTGATGATGCTTCGACGACAGCGTATCGAATTTGATGGAAAGTACTCTT  
CGGGAAGAGGATCATGACTGTGGCGTGAACCTTTCAGAAATGCGAGTTGATGAAGGTTGGTTCTTACGAAAGGTA  
GACCTGTGCCAATCTCACAGAAGGCGCTCCCAAGGCGAGCTTCTCCCTCACAAAGATCTGTTCCCCAACGATGGAA

TGATCGGATTTACTGAAGAGCACGCTTTCGGTGTCTTCCATTTCTCAGAAGAGCGTTTAGGGAGGAACCTTTGTTTTTCA  
CGAGAAGGATTTGGCCAGAAATAAATATATTTTTACGCAAAATATAAAAAAGTTTGTCTCCTTGGCACCATCGACAAGTTT  
TAAAAAAGAACGTATAGAGCGAAGAGGTACGCGATGTCAAACATTGAACTTTCTAAAATATTTCTTGAATATTTTTAT  
TATGGAGTCTCTCGTCTATTTTTGTCTTGGAACTGTCTTCTTTTGTCTGTACAGGAGCAGCCGTTTTCTTGGAAAA  
GGTGCCTCCAAAGCTTTTCGACAAAAGAGTGTGAAGGTCTCTGGTGTCTGTCTTTTCGAGATTGACCCCTCGACAAACG  
AGAGCGACATTTGCCCTCAAGCCCCGCGGAGAAGTTTCGAAAGTGAAGTCTCTCGGATTTAAAGGAAGAACACACAAGAA  
GAACCTTTTGTCTGTGGGAGCGATTCTGGGAAAAAGGTGTCTGATTCTCTTCTGTCTTCCAAATGTGGTGGAAAGTCA  
AAGAGAGCGACGGAGACGTGTACATTGAAACTGTCCGAGACGAAGATGTAGCGAGCAGCGACGCTGAGGCATTGCAACGT  
TACATCTCTACATATGAAAGGAACCCAAAGAAGATGGAAGGATTTTTCTGTATACCGTGATGACAACTTGTATTTTGGG  
AGCAAGTTGTGGCTGTATGTCTGGGGTGGAAATCGCAGTCAATCGACATGCTGTCTCATAGAAAAATTTTTGTTCAAACA  
AAATATTTTATCAAGTCTCTTGGTGTGGGAGACTTTAAGGCTCCAAACATCCCAATCTCCGCTGTTTTACATGGTAGG  
TCAATGTCCCATAATCTCTAAAATACGTCTCTAGTTCTTTGATGGCTTTTTCTTCCAGAGAGGTGGAGGGACCCGCTGAG  
AGGGACGAGTTCCGGATGTGACGCTGTGTAGTCTTTGACTATCGCAAGGAAAAAGACTTGTGACATTTTATGGTAAT  
ATTTTGTGGCATAAAATATTTCTATTGTTCTTTTGTCTCTTTTTTATGGAAGAACTGAGCTCATGGAGGTTTTGATTTT  
TTGTGGGCTCTTACCAAAACAAAGACCTCCGCTGAGGTTCACTTAATCTAATCCGGATTTATGAAAAGTTTGGCCCTC  
AATCATCCAAAGCGTTTGGCAGATGCTTGGTTTTATCCAAAGTTCTTCGTCAAATATTTCAAGCAAAATATTTTATTCA  
GAAGCACAAGGTTGCGAGCTTTTTTGGCGTTTTTTTCTTCTTCGCATAAAGGGGTCTCTCCAATTTGGGAATTTGGG  
CAGTATTTTTTCCCTCTCGATGGTCAAGTGTTTTTTCTTTTTGGGCTTCAAGTTTGGCTTGCGCCCTTTGGTCTGAA  
GGAAAGGGTCAATTTCTTTGGGGGAAGGTGTCCGTGAAGCTGGTAATATTTCCGAGTTTTTCTGACATTTCTTCCCAT  
TTTTTCTTGTGTTTTGGTTTTCTGCCAGCCATGCTCCAAAACAGTTCCGACTGAAGGAAATTTTTGTCTGTTATCCAT  
TTTTTCTTGTAGCCCTCCACCTTTTCGAGAAATCCTTCTGTCTCTGGGATTTGACAAAAATCTTGGCCATGGGACAGAAATAT  
CCTCTTATATCGTTGTATTTCTGAACTCTTTTCAATTTGGAGATAGTCTGTACGCCCTTTTCCAAGTGTGAGCCTTTTCGTA  
AAGGTTTTTGTGTTTTTCCGGCTGTGAGCTCACAAACGGTTTTTTTTTCGAGCCATTTGTCAAGGTCAATACACAAAAATTTCAA  
ATTTAGTTTTCTGAAGGTCCCATTTCCATCCTGGAATAATTTTCAGCCGCTCTGATTATTTCTTTTGTGACGGGAACCGTCT  
CTCCGTTTTGCATATTTTCACTAAGCCTCACACAAAACAGTACAATTTTTTGTGGTGTCTTTTCCGGGAACACGCC  
CTTTTTGTCCAAAAATTTTTGAGAAGCTCCAAATTCGCGAGGATTTTCTGGTGTCAAGTTCCGCGTTTTCTTTATGTT  
TCTGTCAATGTTCTGTACGCCCTTCCAGAGACGAGGATTTTCGAACTCTTTAGAGTACGCCGTCAACATCAATTTCTCG  
GAAAGAATATGTTTTCTGTGAGGTTCTTATTTCTGTCCAGGCACTTGAGAAAACTGTGTAAATTTCTAGAGCTGGAAG  
CGGAACCTTGAACATCTCTGTTTTTCCCAATCTCGAATCAGAGAACATGTAGTGCATATTTCTCTCGAACAGTCCGAAT  
TGCCGGTTTTCTGTATGTTCTTTCGAATCCTGTTTTTCCGAGGAGCCCGTGCAGTATGCGCTCAGTCTTTGTGACAAATTT  
GTAGCTTTCCCCACCTTGTATATTTCCAGGATTTTTCGAAATATCTTTGAGGATGTACACAAAACCGTTCCGAGAGGTTTT  
GACAAGTTCTTTTTCTGTCTTCCAGCTTTTCGAAAACGAGTATCTCGGCGAATTTTCGGAACAAACCGCTCATCGTTTTGT  
ATTTTGTGCTCGCTCTCGAGAGATTTTTGGTCTTTTGTCTACTTTGACAGTCAATGTTTTTCGATGACAGAAATTT  
TTGACTTTTTTGTGAAGAATGAAGAGAAGAATTTCTTTTTCGAGGACCAAAGAAAAATCTTGTTCAGACGTATAAGAAA  
TGCAATTTTTTGTCTTTTGTTCGAAGTCTTTCGAGAGAAATTTTCTTTCGAGAGACTCAAACCTCAAATAATTTTTCTTCT  
TTGAGTTGACAAGGAACTTTTTAAATCTCTCGCGCGTTTCTCAAGTGTGAGCGGACCCGAAATCTTCCCAATATCCAAA  
CAACGAATATGGAGCGCTTTATCCGAGTCAAATAAAGTTGAACGTGCGCTCATCGCAACCAACGAAACCTTCCAAAAA  
ACGCTCCATTGACCAACGCTCAGTATTTGTCTAAGTTCACTTAATCTAACCCGGATTAGATTAGATTTTTCTCAAGCACA  
AAAATCAGAAAACAGAGCTCTGTTCTCTCTTCCCTCCATCCATTTCTTTTTTATTCAAATATAAAAAAGGTTCTACTCTAC  
CAGAAATCGAGGAGTGACACCCATCGCCATCAGTCTTGAATCCGAGTTTTGTGGAGTAAGGATTCGACATCTTGACAA  
CGTTGCTCTTGGCGTGACAGGCTCGGCAGTATTTCTTTCTTTGTTTCGACCGGAGAGACCACAAGCTTTGCAAAC  
CACACTTCGAACTTTGTCTCGAGCTGAGGAAAAATCTGCTCCAGACAGAAAGTTGCTCCGACCTTACAAGGCTGTCTCT  
TTCCATTATCCCGTTTTTAAACCCCAATTTCCGCTTCTGCCTTCTGTGGTTGACGAGTGTGACTCTGGATTTTACCAG  
TCGATCTGGCGTGATCTTGTCTGCTCCACATGTGCTTCCAGGCGATTGAGGCGACAGAACCCACAAAACAGAGCGACTTCC  
ATTTTCTTGGCTGTGCGACCGTCGATGAAGAATCTTTTCCACCTGGAGAATACCCCTCTTCTTCAACTCATCTCTAC  
AATCTGGTAGTTGCTCTGTGAAGGCGTGCATCGGTGTAGCTTCCAGAGTATCCGTTCTGCTCCTTGGATTTCTCTCGA  
GTTCTTTCAACGCATCGTCCGCTCCAGGAAGGTCCTTTCGTATCCTCGCGCCAGAACCGGATAAAGTTCTTCGTATTTCG  
AAACGATGAGAGTCAAGGAGTTCTGTGTGACAGGCTGTCTTCCAGTGTGCTCTCTTTGGCTGTCCGATGTT  
CATACGAGACGGAAACGCAAGAGGATTGATGAGAAAGTCTGGATGAGTCCGAGAACCGCATCGGAAGTGAATGGCATA  
TCTCTTTCGCTTTCAAAGAGAGAGAACACTCCCTTTTTCGAGTGGAAAGCTTGTGCTCCTTGTCTCCGTTTTCCGGGATTT  
GTGGTTGCAACAGCCACAGAAATGCAAAAGTGTCCGCTCGTGTCTGAAATACGAGACGCTGTTGACGATCCCTTCTT  
GTCTTTCCAAAGTAGACAGATTATCTTTCTGTCTCCAGAAACATCAGCGACGGCGATGAGAAATGTCTCCGCTCT  
CGACCCTCTCAAATTCGACAACTCGTTTCGAATCGAGATGTTGAGAGCGGGGCTCTCTCCACATCTTCGCAAGA  
CATTCCATTTTTTCTTCCCAAAAATCTTTTTGTTTGTCTCTTTTTCTTTGTTCTTGGAGGGTCTTGGTTCAAAGG  
ATTTCTGTTCCAGAACACAGTCTGCCTGTGATGAAAGCTCTTCTTCTGTCTTCTTCTTTCGGCAGACGATGCCTTGT  
GACCAGAAAAGAAGAACATATTCAGACTCGCACTCGGACACAGCTTCACTTTTTTGGCCAGTTCTTGCACCACAAC  
CTTTGACAAGACTCTGAAAACCTTGACATCTTGGCAGTGGGAAGGGGAGAGCTCTCTTCCACTGTCTGATCTTTGCCAC  
AGAGTTTTGGATGTGGTCAAGACCATCTCTCCCTCTGCGTAAAGGCTTGCACGCAACGATGGCATCTCTTGTCCAT  
ACCCCTCGTAGCTACACATGCTCAACAGGATTTCTGACAAATGGGGCTCTCGTTTATTCCAAGGAGACGAGCTGCTTT  
GTGCTTGAAGCGGCTTCTGAGGTTAGCGAAGAACATGCTGGTGTGAAGGAGCGATACCAAAGTCCGAGACGAGGAACG  
AACAGAAGACTTTGCCATGCTCGCAAGTACGAGAGACGAGGAGCGGATTTTTCGAGAAATATGGGATGATGGAAAGCAC  
AACTCCATAGACCAAAAGAGGATGAATTTTCGAATGCGTCCATTTTGTCTTGTCTCTGGGAGAGCTGCTCCGCGAAGGA  
CAGATGAGGCTGTGTTCTGTCTCGCATCGAAATTTCAACGATGCCAAAGACCGACAAAATCTTGGCATGTGATGTC  
ACCCCTCTCAACCTCTGAAATGCTCTGCCCCAACTCGAGCTTCCATCTTACCACCTCAAAGGACGAAACGAGTCT  
TCCCCTGACTCGCAGTTTACTCTCACTCGTCTTCTCATCAAAGACGAAGCAACAGTCCAGAAAAAAGTTGGCAGCT  
CTCTTGGAGGACAGAGAGCGCTTCCAGAGTGCCTTGGGAGAGTCCGTCGAACCCATAATGACTCCATTCAAACAACAAA  
CGTCTCCAGTCCAAAATCTTGAAGAAAGTCTTTCGAGAGCAGAGAGGATTTCAAACAACCTCTTGTGTTGATCCGAGGC  
TCACAGTCGACAGAGAGCAAGAACTTTTCGACAGACCAAGTTTTGTCTTTGACTCTGGTGTGCTGGAGGGCAAATAA  
CCATAAGAAGATTCTGTGGACCTTCTCGGCTTTGTCTATGTTTTCTTCCGTTCCGATGGTGCATGAACCTTTTCGAAGATT  
GGACGCGAAGCGACTCCGTTCTCTTTCGTAGAGTGGGAAGTTCTTGTCTTTGTGTTGAGCTGCTCC

AGTTTCTGTGCTCATCGCTGTGCGGATTTTCTTTGTGATGTTTTTTGAGTGGATGGGCTTGAGGGGTCGCTGTTCTT  
TCTCTCCCTTTGCAAGAGTCTTGTGAACTTGGTCTGCTGTTCCACATGCTGTAGAATAGATTGTTCAACAGAGAGTC  
GACACAATCTATCTCTTGTTCGTGTAGTGATCTCTGCTTTCGGGTTTTTATCTCCCGTCTTGACCTTGAGAGCTCTCG  
CGAGCATGTAGCAGTGAACCAAACTTTCTTGTCTGTCTTTGTAGCAAGGGAACAACTTGTGCGAAAGTTCTTTGAC  
AGGGTCGCGACCCAAACGCGGAGCTTGATTTCCGCTTTCATCAGCAGGAAGTTCATCGATGCCCTTTGGGTTTTTGTACCC  
CATGCAAAACAAGAGCTTTCCGCACTGCTGACTCTTTGCTTTCTCGAGTGGGGAACATCGCCCTGGCATGTTCCAAGC  
TGGGAATGAGCAAACCTCTGCTCTTTTGTGAGGTTCTTTGCCCTTGATGAACTTGAGAAGTCCAGATACGAGATGCC  
ATCGCTTCCAGCACAACGCAAAAGGATTTCCCTTCTGAGAGATGCTGTGCATACAAATGGCCACGCCATTTTCAAG  
ACCCACATAGCAACCTGGTGGTTCGTAATGTTCCACAGTTGTGCGAGAGTGGTATCTCTGAATGACCTCGTACTTTGGCATCT  
TTTTGTTCGCTGTTGTCTGCATAGGTATAGACCCTCCCAAACGCTCCCTCTCAGAACAGACGACGATAAATTTCTCGT  
TCGAGGATGAAATATCCGCTCTGTCCTGGGGTCTCCCCACGCTGACGACATTCGTGCGCTGGAGATGTACTCTGT  
CAGGTTGCAGAGACAACTTCTCACCATCACAGGAATCTGCGGATCGTCTGTGCTGTAACACTGCGGTCTCTCCGTCCG  
CAGTTCGTAACAATGATGTGCAATAGAATGGAGCAGAGTACGGGATTCCTCTCCTTCTGGCGTCCGAAGGGAAGATGTC  
TTTATCCTATCGTCAACTTCGCGATAAGTCCACCTTCCAAACGTCGGATTGGTGAATTCGACGACCTGAAACCAAGACTT  
TTCTTCTTGGCGGCGGAGCAGCGCTTCTCATCTTGTCTTCGACGACCTTCTCCTCCTGTCAATCTCGACCCCTC  
CCTTCTCGGATGATGTTGGGGAGAAGCTCCTGAACAACTCATTGTACGCTGAAATTTGATGGTGGCAGGTCAGGTT  
TGAGAAAACCAACCTGTAAGTTTCCACAGTTGTGCTGTTGAGAGCGTCCATGTTTTTTGATGTACAAAAAATCGAGA  
TAAAAATTCGGGAGACTCTGTTTTTCGAAAATGGGACTTCTCTTCTGCTTTTTTTCGTGGGACTTTGAAGAAGAAA  
TAAAAAAGACATCGAACTTCGGAATTTCTCAGAGGAAGAAGAAAATTTTCAGGGAGGAAGAAGAAAATATTTTGAAGC  
AAAAAATATTTATCGAAGCTCCAGAGGCGCATTTCTTCTTCTTCTTCAACAATGAAGTTCTCAAAGAATCCGAGTTCTT  
ACTTTGCTCTTTTGGAAAACGTCAGGACGAAAAGTTTGCACAACTCTGTTCCCTTCAAGAAAATGTGAGAGACTCGAAA  
AGGGCTGCTCTCCTTTGTTCTCTGTCGAGGCGATCCTTGTGTTGACGAGCTTGGGACTTTGAAGTACCTCTGTGAGAA  
GAGGTGGCTGCTGAAAATTCACAGCAGCAACGAAAGTCTGCTCACCTTTGGCTTTTCGCCATTTGGAGGCGCGAAAAGCTTTG  
ACATCAAGATCAAGTCTCAGTGCCTCATCAAAACAACTGTTTCAAGGTGCATTCGTGGCTCACACAAGAGCTCGGA  
ATATGGCTTTGGATTGGCCAGGAAAACCTTTGGAAAAGTCTGAAAATATACGGCAAGTTTCTCTCGCAAAATATTTTACAA  
CTAAATATTTTTAATGAAGGTATCCCTTCCGGAAGCAAAACAACTCGCAAAAAAATTTGGTATTGACCTTGAACAGGTT  
CGATCCATATCTGGAGATACGGATTGCAGATCGAGACGGAACATTTGGAAAAGCTTTTCATGCAGCATGCATCAGGTTGGA  
AAAGTTACGCGCGACCATCTTTTAGAAATATGGGCTTTGTACTATGTTTTGCTCGAACGGATGGAGCAGCGACTCGATGA  
GCATTTCAAGGGAAGAAAAACCAGAGTTCCTTCTGGGACAAAACCTTCCATCCAAGTCAAATAAAAAATACACCC  
AAATAATTTCTTTTAAAGAAAATATTTTTTATTTGAATATGGACCATTCGCTACGTAAAAAATCGAAAAGATGAGCAAG  
GTTCTATACGGAGCTGCTCTGCATACGGAGCAGAGAGAATTTACGAAAGATTCGCAAGGAAAGGAAGACATTTTCATGA  
ACAAAACCTTGTCCAATGGGTGACGAGGCTTCCGGGAAGGCTCGGAATACCAAAACAGCAAAAGGAGAGACTCTCGCTTT  
TCTTTTACGGAACCTTGTCTCCTTTTCGAGGGAAAAGGTTGCTTTGCGGACGGCTACACTACGAAAAACAGACGG  
ATAAAAAGATGGATGAAGGGAAGGAGATTTATATCGCAACACAGAAATATCGTCAATGTCTCGAAAAAATGGTGGAAAAGA  
CAATTTCTGAACAAGGAATTTTTTATATTTCAAAAAATATGAAAACCTTCCCAACGAACCATATATTTTTTTCTGTT  
TGAAAATGAACGACTTCCGCGGAGATGCTTCTCGCAATCTCGAGTTTTTTGACATCGAAACCTTGTGTCTGTTTCA  
GAACTTCCATTTTTTGGCATATTTTCATCCAGAAAACGCAAGTTGCTTGTCCAGAAAATCTCGTGCGAATATGAAGA  
TGCACTCTCTTCTTCAAGAAAAGTTTGTATGAAAACATTTCCACCTCTCCTGCACTTTTCCGTCGACCCGCTCGGAA  
GATTGAGGGAGAGGTAAAATCTGTGATGACTTTTCTCGTTCAAAGATGGACAGCTCCACGGAATAATGCAAGAGACT  
CGGTACTTTGGTACGAGCAGTGGACACGCGAAAACGTCAAAACCAAGGAAGGAAAGCTTCATGGCGTTCTCATCAAGGA  
GCAGTCGATTTGTTTCGATCCCCAAAACGAAAACAGCGGAAAATATGGGAAGAAGGAGGCTTATTTTGCAGACATAG  
AATTCGAGGAAAAGAAGGCATCAACAACATTTTCTCTGTTGGGGAGAGAGTGTGCCAGGAAGAACTTTGGGATTGC  
TACAAAAGATAAACGAAAAGGCAAGGGCCACACAGCAATATGATGCGCAAGCTTGTGCGGCAAGCGCTTGTCCACCGTAAACGG  
AGAAGTCTGGATGGACCGAGAGAAAAAGGAGAAGCGTGGTCTCGCTGCTGTGAAAAGCATCAAAGGGAATGCCCTGCC  
ACATCTAGTGAATTTATTTCTTTTGCAAAAGAAAATAAATAATGTTGTACTAAGATTTTCTCCTCAAGTTCAAACCCCATTT  
TGTCCATGTTTTCCGAAAAGTTCAATTCAGCGCTCACAGAGAGCTCCATTTCTCCTTGTATGTTGTAAGGAGAAATTTA  
GGAAACAAAAATCAGAGGATTTCTGTATGTTTTCGAGAGACTCGCTTGGCGGAAAGAGCGTATCCAAACAAATTTT  
TTGGTCAAATACCTTTTTTTCGAAATCCAAAAATACGGGACTGTTAGGCAAGCTCTCCTCCCGACTGTGAAACTC  
CCGTCTCGCGCATTCAGAGTGGCGTCTCCCATCTGGATATCTTTTGGAAAGAAAAGATATTTAGAAAATTTTAAATGAGC  
ACCTCTACGTTTTTCGAGAGGATTTTTCGAGTTGACGCTTCTTTCGCAAGAGATGTGGACAATCTCAAATCTGAAAA  
CTCGTCGAGCAAGAGGAGCGCAAGATTTGCTCAAAGAAAATTTGAACTCCCTTCTTGCAAAAGGTAAGAGTTTTG  
CGTGTGTTCCGCGTGAATCCGTGCGATGTATCCAAACGAAAGAAATTTGTTTTTCTGGGACATACGGAGGGTCAAGA  
TAAACAAAATCTCGAGTTCCGACATTTCTCAACGCTCAGAGAAAACAGAGACAGAAAACTTCAAGGAGCAAGAGCTT  
AGAGATTTTCGAGGATGTGCTTTTTCTCAAACACTTGAGGTTTTTTGTAGTGACCAAAACGGCACATGTACCCATTAGGCC  
CCTCTCTATAAACTCCGCGAAAGCATGTTTTGTTAAGGAAACAAGACATCGCCGACGTTTTCTGGAGCTTTTTTTTTTCT  
TCTGTGTTGAAGTTTTTCTTGTCCAGTAAAAAACGCTTCTGGGAAAAGAGGCTCTCCTTCCGTCTTTGCGTCTCT  
TTTTCTTTCTATCTTTTGAAGAGCGAAATTTCTCCATGATGCTTCCAAAGATTCGATGAGTTTTTCTGGTCTTTTCT  
GGATGTTCTTGTAGAAAAATATCAGGTTCTCGTTCTTGTCCGATACATAGATTTTTTCCCTGACTCGAATTTCTCCATCC  
CTCACCTTTCTTAAAGACCCAAAAGGACAGACCTCCACCGACAAAGGTTTATAGTAATTTTTTATGGTTTTTGGGAA  
AAGCTCAAGGACGTTTTTCGAGAAATTTGCGACTTCTCCTCCGACCCATTTCAAAGGGGGTTTTGACATTTTCTTACGCCT  
TCAACTTTGTTCTTTTTCTGTTTTATCTATTTCTGTGGATAAATAATTTGGAACAATCTCGAAAAAGCCAACTCGA  
CTCCATCTCAATTTGTAAGGAGGAAATTTCTTTTTCTCGCATGCTTTGTCGCAAAAAACGCAATAACTTTCCCTG  
CAAAGTCTTTCCGCTCCTCCGATGCAAAGTATTTGAGAGGCTTCCCGTAAAGTTCTGGAACCTTCGAGTACAAAAATGG  
GACGGATAAAAATTTCTGAGAGCGTGTCCCTGTTGTGATGTAAGTTTGGCTTTTCACTCGAATACTCTTCTTCTGTTT  
CGCATCGGGGCTTTCTCTTCTTTTGTGGGCGCTTTGGCCTTCTCCAAGAAGAACGCACATCTCTTCGCAAGA  
GCTTCTCCGAAAGTCCGACCATTTGCTTTTTCAGCTTTAGGTCTGGTCTCTTTTTTTCGCGCAAGATTTTCTTCCCGG  
GTCTCGTATTTTTTAAGTTTTTGGGTATACTGCTTTATCGTCTTCTTCTCCACAGGGGTAAGAAACTGAGGTCTCCAA  
AAATCCATTGAAGAACTTTCTTTTCCGAAAGAAGAACTTCTTTGTTGTTGTTGCTTCCGAGAGAGTCAAAAAATTT  
GAACTGTGCTTCCATATTTTTCTTACGGTACATTTCAAGCCATTTTCGTTCTATCAAAACCAAGAAAAGATGA  
AGGTTAGATTGTCAAAGTTCGAGCAACGACATTTCTCGGTACGCAACTCCAGGTTCTTCCGGTCTCGACTTGAGGGCT  
AACATCCCGAAGAGCTGTTCTTGTCTCCCTAGACAGGGCACTTGTTCGACAGGGCTTTTCTTCTATTTCTTCTG

AATGGAAGGACAAATAAGACCAAAGCGCGCTTGCATACAATAGAGGACTTACTGTTTTGAACAGCCCCGGAACGGTGC  
ACACGCGACTACAGAGGGGAAATCTGTGTGTTGATAGTGAACTTTCCAAACGAAAGCGCAAACATCGCCAAGGGAGAAAGA  
ATTGCGCAACTCGTCTTTTCCAAAGTTGCGAGAGCAAATGGGAGGAAGTTCCGAACTCTCAGAAACGACGAGGGGAAA  
AGGAGGTTTCGGTAGTACAGGAACACAATAAAAAATATTTTACAAAAGAGAAAAATATGAAAGGAGCGCAGCTCCCACA  
TGTTCAAACCTCTTTGGGAGGAGTACCTTTTTAGAGATTCTGATGTTCCATCCAGGAACTGTGAAAAACGAACAAGAT  
TTTTTTGTGGTGAACGTGAAGCTTTTATCTCTCAAGAAGAAATTTGCGGTTGGTCTGAATTTCAACTGGAGCGAAAC  
GCGCCATAACTGGTTTTTTCATGGGAGATTTCACCATAGACAAGTTTCTCTCCGATGCCTGCAAACCTTTTGATGAAAGCC  
CTCGCCTGTGAAGCTGTGAGAGACAGACACAAAGAGGCGATCCGAGAGAGGTAATATAATAATTTTGTCTCAAAAAATA  
TTTTTATTCGATAGAGGCACTCGCCGCACTCAAAAAGCCTTTTATCATCGCTCTCTGCGTGTGTTTTTCCAGCGTAAGC  
CCTCGCACACTCTGGGCGTAGACAGCAGAACATTCGCACATTGCACAGGAAAGTCCGACGGTGTGTCTGTAATCTGT  
AGCGGACAGAACGGCGCACTGTCTCCGTGCTCTCAAAATTCCTGATTTCTCTCTTTTTTGTATCCATCTCTGTGTC  
TGTCGAAGAGTTCGAAAGAGTTCGGAAGTTTTTCCACCCTCGAGACGAGTTCGATGGGTTTTGTGACTCCTCTACAAGACAG  
AGGAGTCTTACCCTTTCTGAACAGCAGACAAAACCCGGAACAAGGCGGAGATTTTCCCTGCAAAAAACACAGAAATAGT  
GCCTTCCGTCTTCGCACGCGGTTACTTCTCCCCCAGATTTCTGTTCTGTTGTGCAAGCTCTTCTCATCCACAACG  
TCCAAACAGACACAACAGAGATTGACTTGGACGCTCTCCATAACCGAGATCTCCATTTCTCGAGAAATTTCTGGTTTTCTGC  
CAGCTTCTCGAGCGCTTTCTCTCCCATCAGCTTTTGAATCTTTGCGTATCCGCGCGACATCTCTGTAAAAATATTTCTGA  
TAAAAATTTTATTACTTTTCTCAAGGAAAGATAGAAATGTTTTCCAAAAATAACAATCATCGTTTCTCTTTGAGCG  
ATCTGATACACGCCTTTTTCTACTGCACAAGCGCCCCAGAGATGTCATCATCGTACGTTGTTTTCTGAGATATCCTT  
CACATCGACCGAATCAGGGGTCATTGTTTTCTGATGTTTTGCACACTGCACACCCGAGACTCTCAAGTGCCACTTGT  
CGCTCCAAGAACGACGTTTTCTCCATTTTTAGCTTTTTATTCAAAGGCTAAATCAAAAAACACAGGCAAACCTCGAGG  
CGGTCTCCATATCGAAGAGCTTTGAAGCTCCCTTTGACATCTTGGATCTGTTGTTGGACGCACATCAGTTTCGAGGGA  
ATGTAGTCTTCCCAAAAAGCCCTTTGTTGCTTGAATTTCTGCTCTCGTGTGACGTCGTCCTCAAGGTCAACATTAGA  
AAGAAATTTCAACAGTTCGATTTTTTGTGTGAAAAATGTTTGGCTTCCACTCACTGTTTTTTCAGTTGTCCAAAGGAAGT  
TTCTACTTTCGAAATTTTCCCTTTCCGAGCTTTGCTCTTCAAGATCTCTTTCCAAACCCGACGATGGTGGACAAACAG  
GAAATGACGGAAGAGAGACTCTCTTCTCTCTTCTGCTTCGACAAAACCTTTTACGACAGAAACAAAGTTCTCTTCC  
TCAGAAATGTCGATGGCGGACCAAGGCAAAAAATTTGAAATTTCTTTCTCAAAATATTTTTATTGTGTTTTCGAGCACTCG  
AAAAGGGAGCCAGCGACGATGTTGTTGCGCATTCGAAAGGTTGTTGGTGTCTCTCACATAACTCACTTGTCTAAACGC  
TTCTTTTAGCCGTTCTGTGCTTCCGCATCGCTTGTAAATTTTTGCGTTTGCAAAATTTGGCGCGCAGACTCTGATGACGT  
TCGAAGAAAGTTTGAAGTTCGCTTTGAACGGAGGCAACGAGACAATTCATTGAACGAGCCGAACTCGACAGACATTTTT  
TAAAAACCTCTTCTGTGAGAAGCATTAAATTTCTTCTACCGCAAAGTAGAAGAGAACATGCAAAGCAAGATTCTTCTC  
TAGTGTGGAACATCTGAAAGCAGACATCTCATTTTAGGTTTCAAGGTTGCTGTGCTGCGAGCATGTTCTCAAAAGGGA  
AACATGAGGTTCTTTGAAATGTCGTATGTTCTTCAAAGAGTTTGAAGAAACCAAGTTTTTGTGGATGGACAGAGCCTGTG  
GAGAGAAGTTGGGAAACTCTTGAGGAGACTTTGTTGGACAAAAGAAACAAAAATCATGGACAAAGTCAAGCAAG  
AAATTTCCAGATTTCTGTTGATGCGTCTGCTCAGTTGTCACAAGTACAAGGCGAGGATGGAGAAAAATTTGGAAGCCAT  
CAAAAGGTTCTGTAAGAGATTCTTGAACCTGGAATACTCTCCAGGAGGAAAGGAGCACTCAAGCACAGAAGCATTTTGA  
GGGGCTCGTTTTCCGCTTGTAACTCTCATGGAAGAAAAATTTCTAGAAAACTCGAGAAGGAGTTCTTTGTTGATGTT  
TTCCCTTTCTGTGACGATCGACGAGGAAGGGTACTGCAACCTGAAAGACGAAAAGACAGGAAACTCCATATGACGCTGGG  
AGATAAAAAATACGGAAGAGGACCAACTTTCGACAAGAAAGCTTTCTGCAAGCCGTTCTCTTAAAGAAAAAGAGGGAA  
ATCATCGGAGAAAAACCAAAGGAACTTTTTCAAAGTTTTTCGAAAACAGAGAGGAGATTAACCGCTCACGCGACAG  
GGATTGCTTCTATAAAATATTTTATTGCTGGGAGGAAAGAGCCTCAAAATCTTTAGAGAGTTTTTCTACGTTTGGAGTGT  
TGTTGCGAGACAGTTCAAACCCGTCGCTGAAAATCTTCTTACGCTCGGCAACTCTTCTCATAAGAGTCATTTCTG  
TTCAAAGCATCAAGTATACCGGATTGAGTCTGATGGTACAACACAAAGATCCATCACACATCTTGGCAAAAC  
TTCCGATGTACCCACCCCAAGAGAGTAAAGTTTCTGTAAGCTTTCCGCTTCTCTTTTGTGACAACTTTCGACAAGA  
TTCCATGAGTCTCACTAACCTGTAGCGAAGCACTCCCATCTTTTTTGTCTTATTCCGATGTACCACTTCACTCCA  
TCTTTTTGAAATGAGAGAGACGAAATCCGCGACTTCTTCTCATCCATTGTTCTTCTTGTGACTTTTGAACAACG  
CACTTTTTTCAACTCGAAATATTTTCAAGAAAATATTTCTTTCAACAACTATGCAAGACTCTACTGGTCTCATCTG  
AACGCACAACGACAAACTTTGGAGAGAGAATGTCGTCGCTTCGAAAAGTCGAGGAAAAATTTTATTGACAGAT  
TTTTTCAAGGAAATCCATGGGTTGGATTGGCAGCAGCACTATCTCAAAAACTCAACGCTTGTGTCGTTGACAGAGGAGT  
GATAAACTCTCTCAAGAAAACAGCCCTTTCCGCGAACAAAGAAATCTCTTTATTGAGAGACATCAAGAACTTTGGGAA  
AAGATTCACCTATGTGCAACAGGTTGAGAAAACCTGGCTTTTGGCTTTGGAGAGATCGCCAAAATCAGCCCTTCTG  
GCTCACGTTCTGTGCAAAAGTACATAAAATACAAGAGAACATTTTCCGACCGACTCCAAACGAAAAAGAGGGACTT  
TATTCGTGGTGGAGCTCAACAAGATGAATTCGGCAATCTCTGACGACATGTCGTTGCTTCGAGCGACAAAGAGAG  
TGGAGATCGAAGAAAGTACGCTCTGGGGGAGAAAGCATCGAAAGCCAAAGAACACTTTGAAATCTTGTGTGCGAC  
CAATAAAATATTTTGGATTCAAAAATATAAACGAGAAAAATGGTACTTTCCATCCAATAGTTTTCAAAAAATGCA  
GACGTTCCGGAGCTTCTGTTGAGGAGGAGTTCGAGAGAAAGACATTTGAAATCTCTGTGGCTCCTTGAAGAGCGGAG  
TTTGGGAGGCGAATTTTCTGCGTTGTCCAAAACATCGCGTTAAAAATTTTATGGAAGGAAATGGGAGAAAGGAGATA  
CAGAGTTTGGGTTTTCTGGTGGTTTTCTGCTCGTTGGGAAACAAAGAGATCGCCCTTTTCACTTCAACCGGCTCA  
AACTCTGCGGTACGAGAGCTGAGAAAAACAGAAAAGAAAAAGCGAGGAAACAACTTTTTGAGGATGTGCGTCTCT  
CAAGGAAAAAGTCTCTTCTTGGAGAAAGGTTCTCGAACTCGAATATGCCCCCGGAGGAAACAAAGGCAACAGCAG  
AGGAGCATTTGAAAGCCTTTTCGAGGGAACAATAGAAAATATTTGTTATTGCAAAATATTTTACGAAATGGGGAACA  
TCCAGCAAAATCCGAGCTGCTTCTCGGAATCTTTTCAACAGCTTCAGAAAAGGAAAGAGAGTTTGTATGCGTTTGA  
ATTTGAAAAGTGGGACATCTCCCATGCGAGAGGTTCTCGAAATGGAGAGAAATAAACTGGAAAAACCTTTGCAAGAA  
AGGCGACAGAACTTTGTTGTTGGGATGACAACAGAAAATTTCTTTGTTTGGGGAGATACGTTCTTGTCAACAGAG  
TAGGAAACCGACGATATTTTATGCCATAAAATATCCAGAAAACCATGTTCTCTCCCTTTCTGAAATCCATAAAATTT  
ATTGGAAGGTTCTCGCATACCGCGAGAGGTTTCTGCTTCCGAAAGAAATCTCAGAGGAGGCGGTTTTGGTGCATATTT  
CGATCCAAAGTACGAGGCTTCTGTTTCTGTTACGAGCCTTGGTGAACAGACACCATCGTGGAAAGTTGGCGAATG  
CTAAAAAGAGGTTCTCGAATCCACAAGGTTCAAAGAGAGCAACATCTCAACACGTCGAGAAATTTTTCTTGGAGGA



AGAAGTCAAAGAGCTGAAAGAGGCTGTGAAAGCTCTCTCGGAAAAAATACTCGAGTTCGAATACGCTCCTGGAGGGATAA  
AGGCAGAAGAGGCAAAGAAAAATTTTCGAGAGACTTTCTCGGAAACAAACATAACAAAAGGACACCTTCTTTGGTTCTTTG  
CACACGCTCGCTGAAAGGAAGAGATGTCTGCAAGAGAACTGAGCGCTCAATAGAAATATTTTCTTGCAGAAAATAT  
TTCTTCTTGACGATGGAGAGTGAATTTTGCCTATCATCGAGGAATTTCTTCTGAAAGAACATCTTCTCGAGAAGAAA  
CTATGAAGTGTCCATAAATCAGAAGGAAAAATACGCACAGTCTCTGGCATTACGTCAGATTTTCTTAAAGAAAGTGA  
GAGAAGAAATTTGTTCCCTGGTCAGAGTTTCCGTTGACAAACGAGACGCTGTTCTACATCGGCAACGGCATCTTTGAAA  
AAACAGGTATGCCCTTGACATTCTCAAGCTCGTCAATCCGAGAAAAACAAACATCTCTACACGCTTCAAATGGAGAACTCG  
GAATGCGATGAAACAAAATCTGCTTGTGAGCAAAAGAACAAAGAGCTTCTGGAGCACAATGAGAAACTAAGAGCAAAGA  
ACAGAGAGTTTCGGTACTTCCAGGAGAAAGGGATTCCTCAAAGCAGAGAAACATTTTATCGGTCTCATGTGATGGAGA  
AAAAATAAATACTTTTGTTCAAAAGTATTTTATGCGAATACATGGAGGAGTCTCATCAAAGACGTTCTCTCGTTCCCT  
TCCGAAAGAGCATCAAGTACAGGAGGAAAGAACTTTTCGTCAGAGGAAAGACATTCCTTCTCTTTGGGGTACAAAAGGAA  
CGAAGAGATTTATGTCGTGTTCTTTCGTCGGATCAAGAAAAAATTTGTCTGTAGTTGGTTCGGAAGTGGTAAAAAGAATG  
GCAAAATTTGTGTGGCTGGTTTATGGCATTAAAAACACTAGAACAAACGTTCTTGACTTTCTCAAGAAAACAAATAACATGT  
TCTGAATTTTGTCTGAAATGTACCGCAAAAGGTCCAAAGAAAGTTGAAACGCTGAGAAAGGAGAAATTCGAGACTTGTCT  
CGAGAACGAGAGGTTAACAAATAGAAAAATTTGGAATCTCATTCGCTCCAGGCGGAAAGGGTGTCTTAGAAGCGCAAGAGC  
ACTTTGAACGACTTGTCAAGCAATGAGAGAAATTCCTTTTGTCAAAGAACATTTTATATTTTCTCACATCGTCATGAG  
TAGACTCTTGAACATGTTGAAAGAGAGTTTAAAGGCTTTCCTCGAGATGTAACATCCCTCTGGTGTCTGTGGAACTTTCTT  
ACTGCACCATCGTTCTTTCAACATTGAGAACCCAAAAGTCTCTTTCTATTGGGTCGAAGCAGAGTGGCGCACAGAGTGG  
TGGTACGCATTTCCCGGAGAGAAAGGATAACTGACTCGCAATCTTCTTGACTTTATCCAGAAAAGGATAGAAAACG  
GGAAGACAAAATTTGCGCTGGAACGACTAGTATATTTTATCCAAAAAATAAAAAAGTTTATAGAGAAGAAAAGA  
ATCCTTTGAGAACATGTTGAAAGAGAGTTTGGCGCTTCTTGGGATGAGTACATGTTGGAAGAAAAGGACCTAAAAATC  
AAGCAGATTTGTACCCGGATGTGGAGCTCGAAGACGACATCATCGACGAACTGCACATAAAAAATCCGTCTGGAAGGAC  
AGGTTCTACCATTTGCGAATGGAAGAGAGCAGAGAAACAAAGAGACCGTCTACTTTGAAAGGAGATGGCGAAGAGGTC  
TGAGCAGTCCGGATATCGTGTGTCATAAAAGGGGAACTGGAACGAAATCCCTCCAAAAGTTTATAGGGAGAGA  
TGTCCGAAAGCTGGCAGCAAAAAAAGAAAGCTCAAAGAAAGGAAACAAACGCTCGAGAAAAAATAATTCGGAACGTA  
CTCTTTAGGAGGAAAGAAATCTCTCAAGACGGAAGAAAGATTGAAAAGCTCTGTTGAAATGGAGAGCACATTCGAAATCT  
TTGGACCTTTTGCACAACAAGGAGAAAATTTCTGCGCTCCTTTGAGGAGTGGCAAAAAGCAAGAAAGGAAATTTGGGACT  
TTGTTTCAGTAATAATTTTATCAGAAATAAATACTAAAATTCGTAATTCGTAACCAACCTCAAACAAAAGTTTCTCTCGGCT  
CGAGAAATCAGACGGACGTACTCAACCCATCCCTTTCAAAGACGGAGACATCGTCTAGCTGTTTCACTGTGCGCATTTAC  
AAAAGGAAATCTTTGGGTTTATAGGACATTTTCTAAAACGAGAGTCCAGCCGTAATAATCCAGTAATATTTTACAT  
TGAAAACATGGACAGCGTTCTCTACCGAAAGTCTTGGACATCTTGAAGAGTCTTGTGTCAGAGGAAACGAGGTGAGTA  
TCGAAAACAGGAAGACTTTTATGTTTTCACAGAGTTTGTGGCTCCTTTGTTACTGGCAAGAGAACGATGACGGGACA  
TTTCGAGAGGATTCGAATCTCTGTCTGTCTGAAGAAGAGATGCTCGAGTATCTCGTTCCCGCTTGGAAACACATGG  
CCGTCTGAGGACGTTGCATGAAAAGAGAAAAGAAACGTTCCGGGCTTCCATCTCGAGAGCGTTCTTTGCCCCCTGGTGC  
TTCTTCGCATCATCGAGGAGTTTGTCTCGAAGAGAGCGACATCGCGCTCAGCTACGCATTAACCCCGGAGAAAGAACCC  
AGTCTCGAAGACTTTGACAAACATTTCTACATGGGTGACCATCCATCCGAAAGATTCCAAACAGGAAATCTGTCTGTT  
AGAAGAGATCTTGAGACAGAGTTCGCTTCAGCGGAGAAAGATGAGGTTCTCTACTGGCTTCAGCCAAAGAAAGCAGTCC  
AAGACATATGCTTCGCGCCACAGATTCTCCAGCCACTTTTGGCTTGTCTAAGAAATCTTAAAGAGCAGAAACAAAG  
ATCGCAGAGCTGAAGCAAGAAAGAACTGCGAGACAGAGTTTAAAGTACAAGTTTGTCTCCAGGAGCGAAAGGTT  
CCAAGAGTTGACAGAGGCACTTTTCAACCTCGCCGAATAAATAATCTTTTCAAGAAAAGATGAAAGGGAAAGAGCCACA  
TAAATATTTTCTCAAGATTGTAATGACGACAAATTTGAAACTCGGAGAGAACTTGTGCTCTCCAGAAAGTTTATCG  
TTCTGTTGTTCCGAATCTCGCTCTGCCATCTCGCAACTCCGGGAGCGATAGTTTTCGACACAAGCACAGGCAAGCTG  
AATGTCGCGACTGGAGTTTCATGGAGTCTGGAGGCTTCCCATCGGACCGGACATCGAGAGGTTGCTGTTATGTTCA  
GACGAGCACCGGAGCCATTGGCGTCTGTCTCTCGGATCTGACGACAAACGACATCTTTGGAACCTACGTTAGGCT  
ATGGCGCGGAGCAAGTTTGGGCAACTTGTCTGTGATTGACAGCGATCGGGTACAGAGCAATGGACGTTCTCTGCATCC  
ATCGCTCGCTGTGTTGCGATTGGAGCGAACCGCAGGAAACATCACAGGAAACCAAAACATCTCCATCGGCGCATCTTATC  
CTCTGGCGCGACTGGTGTGATGACAACTGGTGTGTTGATTTCGCTCCGCTTCGGGAATGACAGGTTGAGAAAACATTTG  
TGGGAAACGCAAGTCTCTGATGGAGGAAATTTCTGGACCTTCAACGCAATGTCTGTTGCGCTACAGAGCTGCAAGAGCT  
GCAACAACAGCATCTGAAACATCGTCTCGGAAGCGGCGCTTCCAAACTTGGGAACCTGTGCAAACTGCATCGTTCT  
CGGAACCTCAGCGACAGCAGGAACTTCAGGAACGAAACAGAAATAGTTCTGGAGCTTCCGCAATCGGAACGACAGACAATG  
AGTTGACCATCGCTCCCAACAATACGCAATGGAGGAGCATCGGTCTCTTTCGGCTGCTCCGCAAAACAGCTTCAAATA  
AATCCCGCAGCAGGATTAACACAGGCTGCTTCCAGAAAGATTCAAAGAAAACATTCGTGACCTCTCTGTTGACAC  
TGGGAAACTTCATGACCTCGCTCTCAAGACGTACAAGTACAAAACAGACGGAAAGGAAAGATTATGGTCTCATTGTGAAG  
ACACTTCGAAATCCTTCCAGAGATTGTCACTCTCGACGAGAGGAAATCCTCACGGCATCAAACACCTAACTTTGGCC  
ATGTTGCTTCTGACAGAGTCCAGAACCTGAGAAAAGAACTCAAGGAGCTTAGATAAAAAATTTCTCAAATATTTTGTG  
TAATGAACAACATCTTGAAGAAAGAAATTCAGCACATCAAAGGACTTTTCAATCCAGTGTATCAAACATTCATCTGCT  
CCAGAGCCAGCCATCGGAGGGATGGTTACGACAAATCAAACAGGCGCTTCTTCTTCTGACGGCATCATATGGTATTC  
TCCCTCAGACCTTCCACTCCACGACTTTGGGAACGTTTTCGGGACAACTTCAAGAGCTGACCCCTTCCGCTACAGGTC  
TTGGTTACCAATGCGGTTCTGCTGTGCGGAGAACGTTGTTGTTGGAGAGGAGCAGGTCAAACGCAACAGCCTCTCAA  
ACTGGCTGACCTTTGTGCGCATTTTTCGCGGAAACGCTTCCAAGCCACAGCAACAAAACCTCTCATCGGAAGAACTGC  
TGGAGCGTCAGTTCCTGCTGGACTTGCCTTACAAAACGGAACGGGTGTCGGAAGGGCCGTTTCAAACAACGCAACAGGGT  
CTGATGGAATCGCGATAGGGGACAGCTCACAGCTCCGCAACCTCGGCTCAAGAAAGTTGTTGGAATCGGAACAAACCTTTC  
GGCATCACCTCGTCCAATTTATGATGACAGCGTGGCGATAGGTTATGATAGGTTGAATGTGCCACAGATTTGCTCGG  
CATCATCAACGTCGGTCTGTAATGACCGTTTGAATCCAGGAACCTCCAAATGTCTGTACGTCGGTCTGTTCTA  
CCCTTTCCGCAACATCTCAAAGTGTGCTCTCGTCTGGAACCTTTGCTGGGCGCTTGTCCAAACAACACATTC  
GCTGTGCGCAGCAGCTCACACAAATGGAGGAGTGTGCTCTCTGTGGCGCTTCAAGCAACGCTTCTGCAATTCGACCC  
TGTTACCGGTTTATGACACAGGCGCTTCCATCCAGAAAGATTCAAAGAAAGCATTGAGGATGCGGACGAGAGGTTCCCT  
CTTTGGCAGAGGCGAAAGTTTGCACCTTACGAGATAGACGGAAGTACGAAACATGGCGTCTATCGCCGAAAGCATTCCCGAA  
TTTTAGCCTTGTTCGCAAGAAAGGAAAGAAAGAAAGCGGCTGATGACTCGTGTGATCATGGCACTTTTGTGAGGTGCA  
AAAGCTCAAAGAAAGAGATCGCAGAAAGAAAGAGAGGAGGAGATAAATTTTATATTTATGGGAGGAAAACCTCAA  
TGCAAGAGAAAGTTCTCGAGCTTTTCGAGAGCAAAGGAAATCCAAAGAACTCGTTCGAGTTTCGAGAGGACAAAGAGAGC

AGTCGTTGGTATTCTTCTGTTGACTGCTTTGTTGGTGGGACAAAACCCAAATATCTTGGAAAACAGCGGAACAGGAGGG  
AGGAAACAGTTTTTGGCTTTGGCTGGAGACACTTATACAGGCGACAGCGATTACACGTTCCGTCGCATCGAAACAAAAGACGG  
AACTCCCTCATTCAAGTCCCTGAAAAAGAGAGTCAAAGAGAGTGTGTTCTGGGCTGCTGAAGCGCGTCAAAGAACTC  
GAAGAGAAGATTGTAGAGTCAATACGCTCCAGGAGGGAAACATTGCGAGGAGCGCCCAAGAACACTTTGAAAGTCTTTC  
GATGAAAACAGTAGAAAATATTTTATCTCTAAAAAATATTGAGAACGAGAGTTTCAAACTGCGGTTCTTGGATACGAG  
AAGTTCAACCCCTGTTTGAGAAAGAGGGAAATGTTTCTCAAACCTTGAGACACTTCCAGGTAAAAATACAAAAGAAAAATAT  
CATGTTTTCTTTTATGAGCCAGAGAAAAATGTCCCTTTCGTTCTCTGACTGGGAGCGAAAAAGGATTTAGAGGACA  
TTTTTGGAGCAGCATCCGCGCATCAAACAAAATACGAACTTTTGGAAAAGATACGGGAGAAAAGATGCATCTCGGAGAG  
GGAGCGAAAAGGGAAAGCTTATCGATGACGTGAAAGGAAACGCCAGAAAATTTTCTATTCTATGGGAAACATGAGGAA  
CGGTTGGATGAAAATGCAAAAAACGTCGATTTTCTTTTTCAGATTGAACCCGACAGTGCACACTGTTTGTGTTGAGAA  
TAACAGGGAAAAATATCTGGAAGATTGTTGTGGCCGCAACCGCTCTCTTTCCCTGTCTATATCAAGAAAAGGAAACAAA  
AAGACCACGTTTTGTTGGAGCTTCCCTTTCTTTGCTCTGTTTGGATGCCCCCTCTCTGAAATATCATTGATGTGTA  
TGGAGAAGAGTTGAAAGATGGAATGAAAGGCGCGAAGCCCTGGCAATGTCGCGAGCACTACAAAAGCACAACCC  
ACATTTCTTTCTACAGGAGAGCGATAATCAAAGGTGGAGAGTGAAGTTTGCACCCTTTGGTTTGGCGCCAAAAGGGCAA  
GTTGTCAAAGGAAAGCTTCTGCTCTTTTTCGAATGAATATATTTTGGATGAAAATATATTTGAACCTTCTATGAAACAT  
TTGCAACTTTTCTTTCAAAATGGATTCCCTTGCACAGAACTCTTGTTCACATTTTCGGATTCTTGGACGCGAAGGAA  
CGGTTGATGTTCTCAATGACTTATCCCTTCAAGGGAGTTGGTCTTGGCGAATCAAAGGTTGTTTCGCGACAGAACTC  
TCATGAGAACAGTGCACAAAAGAAGAGAAATGGGTCAACAACATCCGCGGCGTCAAGCTGTTCTGAGAGTCAAGAAAG  
AACAGAGATTTCTCAAGGGAGAAAATCGAAACTGGTGTCTTCTGTTGATGCTATCCCTCTCAAAGGAGAGGGATGTTTGTCT  
AAAGGGAAGAAGAACCGAACCTGGAAAACGAAAAGCATGAAGATGACTCTGTGTTTCCAGCGAAAACAGGCTGCTTTG  
GACAGATGGGAAATTAGACTATGCTTATGCTTCAAGGACATCTACCGGAGAGATGTTTCTGCTTCCGAGAAATGCAAGAAG  
GAGAGATGAGCGTTTCTGTCGAAGGGCAAGTTCTGCTGTGCTTTTGTCAAGGCCCACTTTGACCAAGAAAATGTGAA  
GGGTTTGAACATGGCATAATCAAGTGCAGCAAGAGGAGGACATACGTTCACTGCTGCGAGAAAACCAAGGAGAGATGCC  
GAAATTTGTTTGTAGTCTGAAATTTTTTAAGAAATAAAAATATGGAATTTTTATTGTCATGGTTAAAAGAAAGTAGGGAA  
GAAATGGGTAAAAGGAGAGAAGGAAAATAAAAAGAAGAGGCAACAATTCAGACCCTCATGAAACAGAACCGACAAAATTTGT  
CCCAGAAAACAGAAATGCAAAAACCTTGAAGATTGCGAGAGAAAGAACTAAACATAATAACCGGGTGTCCACGAAAAGAAATAAAT  
TGGAAATGAGACTATATTTCTGGATGAAATATAGAATGGATTTGCTTATTGTTCAAAGAGAGATTGGAGACGAAAATGGAAG  
AGGTTTGGTTCTGCGAAGAAATGCGGACATGCTTATTTCTTCTGTTGGCGTTGCGCAATGGAATAAGGAAATGCAAGAAATTTAT  
TCTGCTCTGTTCCGGAGGAAAGATGATACCGGATACGGAGAGATGATGAAATGTCAAGACTCAAAGATTGAAGAGCTGAC  
AAAGAGGGAAGCTCGGCTTTTGGCGAAGAACTACCGAAGGGAATGCTGAATTTGAAATAAGGTATCTGGACTCTGTT  
ATGCAACCGTTGGGAAGGAAATGGTTGTCTGAACTGCATGCTATAATTTGAAATGCAACGACTGCGGGCAATACAGC  
GACACTTGTTCGGATTAGAACGAAACATCTTTTATCAAAGATATTGAACTTGACGGGATAGGTGATTTTTACAGCGAAAC  
TCTCTCGTTATATCTTGGATTTTTGGATGGAATAATTCACAAGTATCTGTTCCGATTACGGGAATTTATCGGTATAT  
TTTTTGAACCAAAAATATCTAGAAAACCGAGCGCACTCGGTGCAATGCATTTTGGAGAAGTTGAGTAACTTTGACGCTCA  
CCTCTGATGAAATTTGTTCTCTTCCACAGTTATGGTAGGTTAGTTTCTGGCGCAATAGAGCCTATATTTCTGTTG  
CCGCTTTCCCAATCAAATGTGCGAGCGCTGATACATCACAGCTTCACTAGTTTTTTGAAATTTGAGATGTTCTTCTGTT  
TGACCTCACGACGAGCGGAAACACAAAGGAAGAACTCCAACCGGAGCGGAAAAGCGTGTGCTTGTCCATTTTTATTCC  
ATATCTGGAATTTTTATGGGGATTAACAAAAGAACACCGCATCTTTTCCGTTGGAACGAAAGAGACAGAAAATATC  
TTTTCAAAGATATTTTTACGAAGCGAAAAGAGAGCTATTTTCAAGATTTTTCTGCTTCTTGGCGCAATGGAATAAGGCA  
TCTCTACCAAGGACATCCAAACATTTTCTCGACTCTTTTTTCTCACAAAGCAGCAAGGCTCTCGAATTTTTGGAGAATGTC  
GCAAGTCTTTGCGAGATTCTTTCATAACCTTCTCCCTTTATTTTTCTTCCAAAGCTTTACTCGTACCATAAATGAGCT  
CTTTGTAGTCTTTGCGTTCCTTCAAAGAAAACCATACGCACTTGGACACGCATTTCTCAAACCTTTGAGGTGTGGACTTGA  
TAATCGTGCCTTAAACCGTACATACCCTTAAACCGTGCCTTTGTTTCAAGAGTGTTTTTTGTATGGATGGTTTGTGGGTA  
AAAAATCAGTTCCAAAGAGAAAACATGTCCTCTCTTTGTCGCGAGATAGGATTCAATAAATTTGTTGGGATACTCC  
AAGGACAAAACAAATTTGCTTACGACATTTGGAAAACGAAAAGGAAAGCGTTGTGATTAACCTTTGGTAAAAGAGTTTCT  
TCCAGATGGAAGAAAACCTCGAGGACATTTTCAAAGGCTGTCTTTGCGTACGGAAGCGCGCTGTACACGACTTTTGC  
AAAGGGAAGAAAATCTTTGAAAAGGAAAGAGTTTGAAGATGGGCAAGCGGAAAAGCGAACTCAATGCAAGT  
CGACAGAGAAGGAGATTGCAGAGGATGCTCTGTGCTGTGCCTTGGTTTGTGCGACAAAAGGATAGTTTACAGAAAAGGA  
CGATATTTGGAAGTGCCTGTGAAGAAGAGGGAATAAATATTTGAAATAAATATTTATCTGACGAAACACATAAATTTCT  
AAAAAGATGGATACACTTCCCAACGAACTTCTGGTTTGGATTCTCCAGTTTTTGGACGTGAAAGGCGCGTGTGATGTTCTC  
GCAACTTGTCTGAAATAAGGACACTTGTCTCAAAAACAGTAAAGTCTTCCGGATTGTGTAACAAACAAAGAACGACG  
GAACGACAAAAGACGGTACAGATCAACAGCATCGATGGAAGAGCAAAGTTTCAAAGACGAGAGAGATTGCCATGTTGGG  
AAAAAGGGAAGAAAATCCATAGTCACTGACACATGGTGTCACTGCGGCTCTCTTTCCGTTGGGAAGAGAGTGGGAATATG  
GATAGAAGAAAATTTAAGAAAAGGAGCTAAACTCTTCGAAAACGAGGTTTGTGGGAAGACGGAAGCTCCAGTACATCC  
ATACGCGCTCCAACAAGTGGCAAATATCGCCTTGGCGAGAGAGCCAAAGGAAAAGAAAGAACTTGTCCGTTTTCGAAAAG  
AATGTGCTCTCTGTGCGTTTACAATGAAACTGGCGCTCCATGGATGCGGTGGAAGAGCTATCGTATTTTAAAGGATGT  
CGAAGGAGAGAATACAGCGCTTGTGATGAGCATCGAGGGGAACTTCTTTTCTTCTTTTGGACTATCTTGGAC  
AACTAAACTTCTCACGGTAAAACCTTTCCGCGACAGTAAATTTTATAAAAATATTTTAAACCCTTTTCAATCATCCGATGA  
ATATAATTTTTAACCTTCTTGTGACCACAATTAAGTAAATTTAGTAAATTTGTTATTTGTTGTTGTTGTTGTTGTTGTTGTTG  
CAATTTCCCAATTTTACGAGGTTATTTTTAAATTTGTAATTTGTTGTTTGTGTTGTTGTTGTTGTTGTTGTTGTTGTTGTTG  
CAACAAAGGTTGTTGAAAAGAAATGTTTTGGATATATTTTGTGAAATATATCGAAGAGATGGAGAAAATTTATCAAGAATG  
TTTTTATCGAACCCCAATTTAGCGGTTTGGTAGATTACATAAAAATATTTGCAATAAATAAATGGAACACTTCCAGTACATCGATA  
TCCAGACCTTCTGTTGCGGAAGGAGTGGTAAAGATTGAAAATCAGAGAGCATTAAATCAAGGTTGTCTGCTTATGGGTC  
ACAAGCAGTTTGGTATCGAGTGTCTGTTTGGAAAACGCAACGAGGTTGAAAAGAAAACCTCATCGAGTGTCTTACCGGAA  
AATTTGCCCTTGTGTAAGGAAAGAAATTTTCTCCGTTTCCATCAAAGATGCGATGAAAATTTTGGACGAAATTTTGGACGAAATTTGTC  
GCTGATACAGACTTTTACCCTCACTGGGCGAGCAGACTTTCTTGGTGAACCACTTCAAAACTCCTCGGTAAAAACATTTTAT  
CGACGGGTTTATGGGTGAGTTTTCAACGGAAAACATATCCGCATTTGAAAATGGCTGATTATGGCGTCAAGATATCTACG  
AGAACTTTGTGCGATGGAGCAACAAAAGGGAAATAGTCATCATGCACACACAGCGTATTTGGCAAAAATGCAAACTCT  
TTGTTTGAACAAACAGAGGATGACATAAATGGAAAAAGCATAATATGTTGAAAACCTTCCCTCCAACAAAACCGCAGAAC  
AGTTCAAAGCCCGTTCCAATTTGTTTATGGAAGAATTTGACCCATCTAAATATGAGGCAAAAATAAGATGGGTGGATTCC  
ATCAGCAGACATCTATTCTGATTTTGTAGTTGGTCTGTCAAATAAGGCTACAAAACACTCCAATGCAATGTTGTTCC

GGAGAAGCACCACACTCTCTCTTTGAAAAGAAAAGAGAAACATCGAAAGGAAAGAAAGTATCGTTTTGGAAAAATCCGAGAG  
CGCGATTCCCAAAAAGGAAGACATAGTAAAAGAAAAGAAAGTGGAAATAGTTTTTTGGGGCGACCAAAAAGATATTTTAT  
CAGAATAAAATATTTCTGTGGGAGAAACCAACATAAACCGGAAACAAAAGTATATATCGTTCAAAGAAAAACCGGGAAG  
GGATTGCCTCAAAATCTTCAATCCATAAAGGCAATCCCTTCCGCGTTTTCTTTGAACGAATATATACTTTTGTTCGG  
GTTCTGTCTCAACAGACCTTTGGAATCTCGAACTCTCCATTTTTGTTTTTGTATGCACGTGTCGTTGTTCTCCGATA  
ACCAAGGTGACGAAAACCTCGAGCACCCATGAAAACCTTTTGGTTTTGTAGTTCTCTCAATCCAAAGTCGAATGTTCTC  
CTAAGTATTGAGTTACCCAAAACATCATCCCCTGTTCTGGTGGAAAGTTCCCAAATAACTCTGGAAATATCTGCTTTT  
CGCAACTTTTGCCTCACTTCTTGAATTTCTTCTTCACTCTGAGCTTCCAACTTTTTTGCATCCAAAACGCTCTCAT  
ATCCAGGCCACAAAAGAGCTTTGTCATATATGACCTTCTCGAGATTACAGACAAAAGCCAACTCTTCTTCCCTTTT  
ATTTCAAGTTTCGCTTCGTTCTTCTCTTCAACATGACCTTCAATCTCAGAGTTTGTCTCTCTTGTCCCTGAAAATGC  
GAGCTTCTGATTTTTGAACTGCTTTTCTTCCCTTGGTAGACTTCCACAAATTTTGGGATTATGGCGCTTGTGTACTT  
CAAAGCCGTGAGCAAGCATGAACTTTTTACAACATAAATATCTTCTTCTGTCTTTTCTTCTTGGCAAAAGAAAAGAG  
AATTTCTCCCTCGCCAAATCTGGAGCAGAACAATTTTTGGTAGTGTTCACCCCTTATCTCTTCTTGGCAAAAGTTGT  
CATCTTCCGACTTCTTGGAGTTCTTCTCTTCAAATTTCTCTGCGTACTCTACGGACGCTCCTTGTCTTCCAAGA  
GTTTTAGCAAAACACCCGCGATGTTCACTTTGAAATATTTCTTCTGACCATCGTTTCAACGTACGCTTTCGAACGCGGA  
GTTTCATGATATTTCTTGTGCTGGGTCCAGTTTTATCTTGAAGGAAAAGAGCAGCTCGTTCTGTCTCAAGACT  
CTTGATTTCCCTTTCGCGTTGGGACAGTTTGGACAGTTTGGACGTTTGGACGTTTGGACGTTTGGACGTTTGGACGTT  
TTCGAACGCGGAAGAGCATCTGTTCTGCTTCTTCCGCGCAACAGGATCTCGAACTAAAATACCCGTACACCTTGTCAAAG  
TGAGTTTCTCATAGCTCACTCCGGCTGAAATTTTTGGAGTGTAAAGCGACAAAGTCGTAGTCCCTCCAGCTCTCCAACCA  
AACGTTCTCGCTTTGGCCCTTCTCCCGTATACCAAGAACCTTTATAGTCTAGGAATTTGCTCTTTGCAAATATTTGAA  
GTTTTCTTTTCGAGCTCGTTGCAAAGCATATTTTGTCTTCTTCCCTTTCCGCGAGGTTCTCAGAAGAGCTTTTGAACTCGAGG  
AACCCATCCAGTACAAGCACCTTTTTATCAGAATGAGCTTTGTGTTGTTGTTGTTGTTGTTGTTGTTGTTGTTGTTGTTG  
TTCAAAAGGTCGATGTTGTTGTTGTTGTTGTTGTTGTTGTTGTTGTTGTTGTTGTTGTTGTTGTTGTTGTTGTTGTTGTTG  
ACGTTTCCCAACAGCTCTCTCTTTTGTAGTGTGAGGAGGAGTACGAGGAGGAGTATATGTCACCTCATACATACATAAAA  
AGGTATATTTTCCAGACACCCGATGGAGTGAATCTATCTGAACGACGAGCCTCGACGAAAAGAGCCATCCTTCCCTTCT  
ATCTTCTGTAATGGAGAATCCTGGAAGATGTTTGTGACATCTCCCTCGCGAGAGTTGCGCTATATGTGACGCGGAGAACT  
TGAGGAAGGTCGCGTTTTGAGATAGTTTGAAGAGCTTTGTTTTTCTGTGCCATCCCTCCTTGGATTGCGATGCAC  
GCCTTTCCCTCTTGAAAAATATTTGACGCGGAGGTGAGGAGGAAATAGCAAAAATCTGCTTGGAGCTCGGGAGTCTGT  
TTTTCTGAGTTTTCTGGGCTTTTTGAGTTTTTGGCTGTTCTTTGTGCGGGCTGTGATGGGGAAAATATCTCCCTGCACGGA  
AGCAGTAAATCCAAAGTCTGTCTGTTGTAACGCTTGCAGGTAGTTATCCGATCGTGTCTCTATCGCAAAAAGGGGCAA  
TTATTTGATTGCCCCCTTTCTCGTTGAATGCGCCATTTGGTTTTCTCTGTCTCTGGATTCAAACACTCCTCGAGGTC  
GTTTTCCCAAACTCGTTCAAACATCTCAAATTCACAGGATTTTCAAGGCAACGAAAATTTTACTTCTTCGGGTTCCG  
GTTCTGTATATCTCCATCCAAAGATATCCTTTCCGAGTTCCAAAGAACTCGATGGGGTCTTATCTGTGTGTTCTGCG  
ATTGGGAGCAACCTTCGGGAACCTTCGGATTTCACTGACCAGGGAGAGCGTATCGTTCTGTTTGTGTGTATACCTGGAT  
ATCCAGCATCTTTGCGAGAAGTTCTCCGTCCTCTTTTCAAGAAATTTGATAAACTCTCGCATAACCCCTTCATCTG  
AAACAAAGTCTGTAATGCGCTTTTTGTTGTCAGCATGAAATGAAATTTGTTGTTTTCCAGATTTCTTCGCGCCAGCTCT  
GTAATAAAAAGTCAAATTTCTCTTCTGGGAAAACCTCCCTTCTCAACTTTTGGAAAAGTTTGGGAAAGTCCATAACA  
GATTTCTTCTTTGAAAATCAGAGCTATCGAGGTCAAAGATTTCTCTGTTGGATGTCCTTGAAGAACTGTTTATGAA  
ATCTTTCTCGTTGTCAGGAACAACGAGTGTCTTCCAAATCTCGAATCTGTTGAAATGTTGGGTAGCTTCCATAAGCACTGAA  
TATCTAGTTGTTTCTGACGCAAAAGAAAATCGTGACCAACAATTTCTCAAAAATATGGGCAAGTTTTTGTGGAGAAG  
CAAGCCGACTTCCCTCTTTTTCTTCTTCTTCTTCTTCTTCTTCTTCTTCTTCTTCTTCTTCTTCTTCTTCTTCTTCTTCT  
CCCCGAACCTCTCTGAACACAGCAATATCTCGGAAGTTTCCCAAGAAAACGCAAACTTACCCTTGTGCAATATTTCT  
TGTTCTCTTCTCCCTCCCTCTCTCATAGAAATTTGAAAGTCTGTTGCGGCGGTTGCTATGTTTCAAGAACTCTCCG  
ATGCTCTTCACTCTGATAATGCTCTTCAAATCTCCCCATCTCTCCCTCGAAATCGCAGAGAGGGCATCCGAATTTT  
CATCCCAAGTTTCAAGTTCAAAGAAATCGGGTTTAAAGATAAGATTGAAATTTGGTAGTGTTTTCTGCTCTGTGATAGCCGG  
TCTGCCATTACAGGGCGTTTTTATTTTCTTAAAGTGCCTTATCTGTAATAATTTCTCATAACGAAAATGTCCACCGGT  
AAGTTGATGATAAGAAAAGATCGCAAAGACGAAACGCAAGACAGCGGAATGGGCAAAAAGAAATCCAGAATTTG  
CAGAGAAAGGAACAGGGAGTGTATGAAAGAAAACAGAAAACCTTTTTGGCAAAAAGCAAGCAGTACGCCGAATCA  
CGGAAGAGGAAAAGAGCTCAAGAGGAAGCTAAAGAGGAGCGAAAAGGAAAAGAGAGAAGTTTTCGCGTTTTGGGAGAA  
ATTTGCGATGGATTTCTCCAAAATATTTCTTCAAGAGCTCCGTTCCCTCTCAAACCTCTCGCCCCAAAGACAAATA  
AAAAATTTTTCTCCATAAAAATATTTATCTCAAATCAATGCTTTTCACTCTCATAAAATAATCTCAAACATGGAAGAA  
AGAACTTCCAGACTTATCTCATATCGAGGAACATCTCAAGGAAAGGTATCTTTTTTTCGCGGGAGACTGCAATGTCTG  
TCTAATCTCTCGCAAAATCTTACACAAAACGGCTCTGAGGAGGAAATTCAGGTAGGGGTGTACAGTCCGTTCTGTGCGA  
AAAGCCCTTTTTTTCTTTGTTGGATGGGAGAACTTCCAGATTCTCGTGTTTTTATTTCTGACTTTGGTGTTTTGAACGAA  
GTGGAAGCGCTCAAAAACATAAAGAGTACATTTCTGCCACAGAAAATACAAAAATACTCTGAAGTTCTCTTTATCT  
CGAAAGACTGAGGAACAAAGGGCTGCACACGGAATTTGGCATCTTGAACAGAGATTGAACGTCTCAAGCAGAAGAAGA  
GAGAACTCAAGTACAGACCTGGAGGATATGGAGCTTTGAAGGCACGCAACAACCTTTGAAAATATTTTGAATAAAATAT  
TTAAATCTCACTCAGAATCTCCAAACCAAGGCAGAACGTTCCCTTGTCACTTCTCTTCTTCTTCTTCTTCTTCTTCTTCT  
GAACTCGCTTCTTTATGTTTTCTTTTGTGGTGTTTTTGTACAACAGAAAATTTTTCTGTCTCAGAAGCTCCATCAAACA  
CACAGAAACCTCATCTATCTTTGACCCAAACGCTCTCGCAATTTCTGACTTGTCCAAACGAGCCATCAGCACGCCATC  
AAAAGTCAACAAAATCTTCACTCGTCACTCTATCAAAGCAATGTTTTCCAACTGCAATGTTCTATAGAACCTCT  
CCATCCAAAGACCGAGAGTTTGTGGTACTCAAACATTTGGAGTGGTTTTGCTTTCTGGATACTCTGCAAGACACAGAAA  
ACGTGCCCTTCCCATACCGAACCAACCTTTTTCAAAGATTTGAGGAGTGAACCTGCCGCTGTTCCCGAGACTTTGAG  
ATTCGTGGAGTTCTTGAAGCGTCAAAACCTTCTCTCTGTTCTTCCGTTGAGAGGAAACAACAACATGAGATAGAGCT  
TTTTCTCCCTTGGCGGACTCTCGATAATCCCTTTTGTGTTCCAGACTACATTTTGTGGTTCGCAAGCCAGAGACGAGGCC  
TTCCCATACACAGGAAGGAGACGCAATTTCCGGGACTGAGCAGAGCGTTTCCACTCTCCGATAATCTCTCAAAGAGGT  
GTTGCAAGCGCGTTCGCTTCTCCGAGAGGTCAGGCAAGTTCCGTCGTTGACGTCCAAAATGTGTTGTGACGCTGT  
TGAGAAATGCAATTTATTTGTTGGGAACTCTATCAAGAAAAGAGTTATGAAAAGTCAACAGTCTGCGGTCTCTTGT  
CAGCGTCACTGCTCTGCTCTCCGACTTATTTGTTCTTGAACACTCAACGAAATTCAGGCAAGAAACAACAGACTT  
CGACGAAAAGAGAAACAAAGTCCATCGTTTGGAAAAGCAGATGCACTGTTTCTGTTTCCGACTTTTTCCCGATGAGT  
CTCATCCAGAGAGAAAGATTTAACTTTTTGGTCAAAGTTAATAAGATGTCGTTACAGCAAGGAAAATTTGGCGGAAG

CTACCTCATCGGAGCTGCTGGATTGCTCCTCTCATCGTGAAAGACATGGGAAAAGAGAACCAGAAAAGGACGTTCTGGG  
AATTATATGCCAATCTTCCCTTGGAGAACAAACGTTCTTCCCATACTATCAAACCTGTTTTTCGAAGGATAAAAATATAACCAC  
AACTAAAACATGAGCAGAAGACTTTCAAACCTTGTCTCGAAGCGGAGGACGCTTTCGCGATGTTTGGCATCTCTTATTG  
CTACTGTGCGACGGGGGCGAGCCTCATCATCGGCGCAGAAGAAGGCAGAAAATCCGTCGACAATGGCACAAGTGGTATC  
AGGACCTTCCAAAGGTTCTTTTTCAGAAGTTATTTCTCCCTTTCTACATTCGGAATATCTTTAAAATCTTTTTTCAAAG  
CTGGATTATCCCAAAAATAAAGAAAGATGTCAAAGGCCAAAACATTTGGCTTGCACCTTATGCGGTGACTGCCATTCGCGC  
TATCTTTTGTGTTGTTGAGGAGGAGTGAAGTTGGGATGGTCCGAACAGAACGCGACCTTTGGAAGCGTGACTTCTTC  
GTTTTGGGTTTGCATGTTCAAAGGGACATTTTTATCCATACTATTTTTACAAGTACGCTAAGGGAGACATACTTTTTTGAA  
TAGAAAAGGATATGGATAGTAAATTTTTGAGTTGGCTTGGCATAATCCATCAAGTGAAGTCAACGACCCTGAGAC  
GTTTTGACGTCTGCTTCCAGAACACAGAGAACAACAAGAGTGAATCTTGAAGATGTCTAAAATACATCCAAGAAC  
ACGCGATGTGGACAAGGGAGATATCATTTGTGCAAAATTCGCGCGGTGCTTGTAGGACGGAATGTCAATGTAAGAGAGAA  
TTTTATTTTGGAGAGTTTGCAGGGAGTGCCTCCACGGCTTCTTTTTTGGAGATGTCCATGAAATCTCTGCGAGTGT  
TTCCATCAAAGGGTGGAAATCTCCGAGAGACGTTGTTGTTTATTTGAGAGAGTCAAGGATAAAAACAAGGGACCTTCT  
CTGTCTATCCCTTTAGGTTTTCATGAACCTTGCAACGCGCAAAGAAGCTCTACCCAAAATAATCTCTGTTGTTGGGAAGCAC  
AAATTCAAAACCTTTCGGAGGAAGAAATTCCTGAAAGTTTTCAGGAGACGTCGATCTCACCGTTGCGCTCCAAGAAAC  
AAAAGAGAAGAACAGAGCTTTCGAGGGAAGTTTATACGCTCGCAAAAAGAACAAAGAGCTTCAAATTTGCTCGCAG  
AGGCTTACGCTCCAGGCGAATTTTTAGCAAAAAGAACGCAAAAGCACTTTGAAAGCCTCTCATAATATTTTGTGAAAAT  
ATTTATTAGGATCTTATCTTGTGCGAAAACAAGAAGGCTTATTTGGCGCAACCAAAGGCTTTCGTCTCTGTGATAAAA  
TTTTCTCGGTTAGTTTATAGTCTTCTCTCCAGGTAAGTTTTCGAAGATTGAGACATCTCTTGGAGTTTCTTTGCTCTTT  
CAGGTTTCTCAAAGAGACAGTGGTAGCGAAATACGGCACGAGCGAATGTTTCGTCCATTACGACTGGTTTATCAACA  
AACGCTCAAACAGAAAATTTCCGACGATGTGATATAAGTGCACCGAGGTGAGAGAGATGGAGGTTTTGAAATGGTTCTG  
CGCCTCCACAGAAGAACATAAATATTTTATCAAGAGTTGTGTTGAAAGACACAGATACCCATCGAAGGTTTATGTA  
CTTTTTCTGAAGGTACATGTTTGGCAGAACATGTTGCGATTGCACATTTGTCAACTTTTTCTGGGATGATGTCGTAGTTGA  
AGCCAGACTTTACGAGACTCGAGTTCTGTAGATCGCACAGCTCCGAACCGCTATCCACTTGTTCGAGGTGCTCTCT  
GGAGTCGAACCGAGATGGTCCAATTTCTTCCAACGGCATGGGAAATCCATCTGTTGGGATGGTATCTGCCTGCGCTCC  
CAGTTTCTGTCGCAAGACCATCGTAATGACTGAAATCCACCGGAAATCTCAAATTCCAAAGGACGCGATCATGT  
CGATGCTTTTATCTTGTAGCCAAACAAAGCTGTTGAAAAACCCGCTTGTATACAGACGACCGATGAGGTCAACGCTC  
TGAAACAACGCGTAGTCCCAATCTTGAATCTGAAATCTGCTTTTATTTTATCCAAATAAACTTGTGCAAGCATCGACATCTGTT  
TATCTTCCCTTTGTCACCTTCTGCTCTTCTGTTGCAAGTTTCTGCTACAAGATGGCGGTTTACACCACAACCCA  
GAACCATCACTCTCTTGTCTCTTCCCTCAAGAAAGTTTTCTCGTATTGTCTTTGGAGTCGTTCTCGACTATA  
AGAAGGCGCCAGTCTTGAATCTGCGGTTGAACCTTTCAAATCTTGTATGATATCTGGAATCTCTCTTCTCCGCTCT  
TATCATTTGCACAGAAAACCACTCGAGATTTCTTGCATGTTTCGAGGCCAAGTTGAACCATCTGTTGTACCTCTCTGGCC  
ATTCCTTTCCAAAATCTTCAAGGTTTCTCTCCAAGATTTGAGAGTTGAAGATGATCTGAACCTTCCAAAAGAAATTC  
CAGAGGAGGAAAGAGGAAAGTCCGACGAGAGATAAAGGCCAAGCTCAAACGCTCCATCTGTGTTACTTGTGCTGAAG  
AATTAAGAAGAAAAGCTTCTTGTTCAAAACAAGAAAATGTTCCAAACGAAAAGAGGAGCAAATGCGTAGACGACTG  
CGCTTACAGGGTTTATTCGAAAACGAGCAGTCCGGAAGTGTGAAAACAACCTCAACGAGGAAGGACATCTTCGTAGCTTTT  
GCAAAACAAAAGTGTAGAACCATAGAGAACAGCAGAACATTTGCAAAGTGTGAAAAGAGAAGGAGAAAGGACTGCGAGTAC  
CCTCTGGCCGACGATTTGTAAGAAGAAAGTTCGAAGAGGCTTGAAGAGCGACTTGCCTGCTCTTCTTTGTAATAATTTTT  
ATACTAAATTTTTAAGCGATGTTCTTCTCTGTAATTTCTGTTGTTTCTGGTCTTCTGTTGATGAAAGGAGG  
GGAAACTCACTCTTTTGAAGTCAACATGGTCAAGGTAATAATCTCGAGACCTCTCTTCCGATAAAGTACGCTTGGTGG  
TTCAAAGACAAAAGCAGGGAGGCTCCAGTTTTTCAATGTTTTTTCAGGGACCGAAAGGAGGAAATCTCCACAGTTTCCAC  
GCTCGAGCTTCCAGACGCTGACAAGGCGAGTTTTCTTTTCAAGCGAAATGTCGAGTTTTCTTGACCTTGAAGTGAAGGATA  
AACGGGACGATCTGCTTTTGGTCTCAAAGAGTAAGATTTTAAAATAATTTTTATACTAAGTATTTTTATACAAGGGTCA  
GTACAAAACCAACGTTTATTCGAGAAAACATCTCCCTCGTCACTCCAGAGCACAAAGTTTCTGCTTGTCTCTCCCTCTCC  
TTCAGGAAATTCAACTCTTCAATATCAGGCTGTTGAGAACCAAAAGTTTGCATCTCATCTGCCATTTTCAAGAGGC  
AGGTGTCCTTCAATCTGAGAAAACATGTGAGAACCAAGGCTTGTGTTGATGCCGTAAGGAACTTTTGGCCAGAA  
ATCTCTCAAAGCGCAGAGCTGAAAGTTGTTGCGACTTAACTTTCGAAGAGAGATCGCAGAGCAGGAGAGCGGATGAT  
GAATGTCGTGAGTGTTCATTGTGAAAATAAAGAGACGAACGAACCTTCTCTTCTGATAATTTTTTGAAGAGAAAA  
ATTATTTAGTCGAGCATCTGTTCCAAAGTTTCTCTGTCGAAAAGTTGGAGAAATTTCTGTCCACTTTTTGTTCCCCGAAC  
GAACAGCTCCATTTTTCTTCTGTCGAAAACAAGCGGAAAATTCAAAGAGTTGGTACGCTTTGCTTCTTGTTCATCGA  
GTTCTCTCTCTTCTTCTTCTGAGCCAGAGACGTAGTCCGATGGGTGCAATATGACAGCTTCTCTTCCATCATCGTTGTG  
CTCCCAAAGTGCATGACCTTGTGCGTTTTCCCGTCTTTCGAAAAGGAGATGTTGCGAGATTTGAGATCGGCGTGAACAC  
TCCGACAGTGTGTTAGTGTGTTGGCTGCCAGAAAAGCTTCTTTTCCACAACGCTCTTGTCTTCCAAAGTTTTCAGAGGTT  
CACCGTCAAACCAATCCATGCGGATGACAGCGTCTCTCTTCTGTCAAACCAAGAAAGAGAGGTTCTGGGAAAAGT  
TCAGCGTCTGCTCTCCAGGCGAGACATCACATCAAACCTCTCGAGGATTTCTGTTCTCTCTCCGTTTGGACGACATCT  
CATCACCTTTTCGGCAACACTCTTTTTCCCTTGTGATTTATAGACACCACCAGAGCATCCACGAGCCACAAATCTC  
TCGTGCGTTTTCTGACTTCCATCCCTTCCCTTGGCGAAGAGGTCGCTTGCATACAAGAACGGAAAGACATTTGTGAAA  
GGAAAAGACAGATTTCTCTAGTGTCTGCAATTTATATATTTTCTTGAATAATAATAGTGTCCGCGAGAAGTGAAGA  
GCTGTTTCTCATGAGACGCTCTTTGTGCTTCTTTTCTGCTTCCGAAATCCAAGACCTTTTTTGAACGAATAGTCCAACAAG  
AAGTTGACAACGTCGGCGTATCCGTTTTTGTGGCTCCGATGAGAGCTCTTGGTTGAATTTTCCCTACGATGGAAGAC  
GAGGAAATTTGACAGAAATCAAATGTCCATTTCTGCTGCCAGGTGAGAGCTTCTTCCACAACCGACGAGGCTGTTG  
AGTGAAGCACTCTCAGAACCTTGACGTGACCATTCGCGCTGCTCCGTTTCTGCTTCTTTTGTGGGCACTCTTTCTG  
ACAATCAAGAAACGAGACGACATGCGAATGACCGAAAGTTGAGCTTGTTCACAGCGTCCGAAAGTGCACCTTCCGA  
CCTGTTTTTGTGGAGAAATTCACAACAGGAAGATGCTTCCATTGCCGCCAGTCCATCGCTTTTTGCTGCATTTGG  
TGCCGACGATGGAAGTTTGGACTGAATGGAGTCTCCCTCAAAGCTGCAAGGTCAAATTTGTGAGACGACATTTGA  
AAAGTGAAAAACAAGCTTCAAGTTGTTCCATCAAACAACAATTTGAAAAGGATGCGAAAACGAGACTTGTCCATAACG  
TGCAATTTTCAAGATTTGAGAGACAGGCTTTCGGCCAGGAAAACGCTCTCGCTTTTCTGTTGAGACGGGGAATGAC  
CGCATTTTGTGATGCTGCTGTTGAGGCTCTCTGGGGAAAAGTAAAATACCTGCTGCTCAAAGTGCAGAACTTGCCT  
CGTTTGGTCTTATGACACTGTCGCTGCAAGAGTTTGAAGAGGAAAAGAGCGACACTACTCTGTGACGATGAAAT  
TCTTTGAACATAAAAAGTGAATGATGAGAGCTCCAAACATCAAATCAACCAATATTTCTTGTGATCGACAAAAGGA  
AAAAATGCAAAACGAAGACATTTAGTGTGCCATCGTGTGATGAGGAAATCGTTCGAAAGATCGCGTTTTCTGGTGTGGT

CTTTTCTGTGGTTTCAAGGCAGGATTTGCGCTTCCGCTGCTGCTTTTGGCTCTCGGACCTGCGCGTTCGCGACTTTTTT  
GAGCGTACCTGTGACGCTCGCATTGTTCCTGCGCCCATGGCATGGTTTCTGCCATTGCGAGTCTCTTTTTTACAAAGT  
CGTCAATCGTCCCTGGATTGGTGTAGTTATCTGCGGGTGTCTCGTTGGCGCTGTCTTTGAACAAGCCAAAGTTT  
CTTGTCCCTTTTGTGGTCAACCAACCGCATATTCATCGCAACCAATAAAATATTTTTTCGTATAAAATATTTAATCA  
AAACCATCGCGTATAAAAAAGTAGTTGTCTCCGGACAGTTCGAGACGCGGTCCCGCTTCCGACCATTTTATGGCTCCTT  
TTGCCCTCAAAGTCTTTTATATACTCGTCCAAATTTTCAAATCTGGAACCTTCCGTTTCCCATTTCCGACAATTTCTTT  
AGTGAATATGGGACACCAGAAACCAACGAATTCGCCTTCTGCTTGCATACAACAACAAAAAGGTTGACCTGTCTCT  
CTGAAGCCAAAAGATTTGACCAACAACTGCATGGAGCTCTTTCTGTTCCTCGAACAAACAAGAGAGAATCTCGTTTCTCT  
GTTCTTGCAGATGAAGCAATCGTGGGGAACTCCAAAAGAACGACTCAAACATCGCTTGTCCGTAGAGATGAAAACA  
GAAACGCTCTCTAAAAATCAAACGCTTCTTCTGTCGACGCTCTCAGAAAACAGAACGCTCGAGACTGTTTCGAGTCA  
TGTGACTCTCTGGGAAGATACAAGGAAGCTTCTTTCCGCGACAACGCTTTTTTTGGAAGGACGGTGTCTTCATG  
GAGAGTACGTAACAAAAAAGTCCAGGGAGAGCATGTACCTCTTGTGGAGAGAGGGTGTTCGACAACGGCGTGC  
AAACCTTTTTTACAGCTCTGTCCAAGTGCAGCTCCAACCTTATAGTTTTTGAATAAAAAACTATAGCTTCATAACAAGAGA  
AAATTTTCCAGATCTTCTCTTCCGACAAGCTCTTCCGACTCTGGACTTTCTCTCTGTTCAAAAAACGACGTAGT  
CGACTCCCTCAAAGAAAGTTGGGACAACCGGAGTGAAGGATTTCCAGACTTCCATGGGACAAGGGAGACTTGGAAAT  
TTTGAATCTTCTCGTTCTTGAACAAAAGCAGACTCGTAATACGGACTACCCATAATTTTATCGGATAACCTTTCCCA  
TTTTGGGAATGAAGAACTCTGCGGTCTCTTCTCTTGGAGCCGATGAGAATGCACTTTGCCATATATTTTATCCAAAA  
ATATTTTTTATCGAAAACATTTGTCGATTTCAAACCTTCTGTCCTCCGACATCACAGCTTCCAGATCTTCCCGTCTTTT  
CGCAACATCTTCCGATGACGACGAGTCAATTTTTTCCAGAACCTCTGAAACTGGTTCCTCATTCCGCTTCAAACCTCCAG  
TAAGACTCTCCGTGAAACCAAGGAGAATAGAAAGCAATGGAAGTTGTTTTTCTTGCATTTGAGATGAGCGTCCA  
CGGATCGACAGAAACATCAGAACAGATGATTTTTGAGTATCTTGTGAGCCGATGAGAATGCACTTTGCCATATATTTTAT  
TTTCTCTGTTTTCTTGTTCGGAAGGAGCGCACTTTGAGGTATGCTCTGTTTTTGTCCAGGATTCGTAATCTTTTT  
TTTACTCCCTGAAACATGTTGTCATGTCCCATAATTTGGAGTGCAGTCTTCGAAAAGAGCGAACGACCCATGAAGCTT  
TCCCTTCCGGAAGTTTTCTCTCGATGAGGATGTCAGCTCCGCTTCCATCACACAACGGAAGGTCATGGAGCG  
CTCCCTTCTTCACTGTCCAAAAACAAGAGCGTACTCGCCCTCGAATTCGAGTTTTCTCTTATCGACCAAAGGGG  
TCAACACAAAATTTGCTGTCTCTTCCCTTCTTCTCAAGAGTTCGTTGTTTCGGGACATACAAACCTCCAGTTT  
TTCTGCCACAATTTCCATCGCATTCTACTTCTCTCAAAGAAAATTTCTTTGAGCGTCCGCGAGTCTCTTGTCCACT  
TGTTCAAAGCGCAGAAAATTAACGACTTCTTTGGCATCAAGAAAGCTCAAATAATGAACATACATTTCTGGGGAAAGCTGT  
TCCATGGTTTTCAAAAATATGTGCAAGTCTGTTTGCACGATGTCGATAAAAAGAAAAGCTTGTGTTTTCAAGCTTTTGC  
TGTCCGACGCAACAGTTTCCAGGAAAAGTTTCTCTCATCTAGAGAGAAAATAAATATCGTCTTTGGGAAAACCTCCAG  
GATTTGACAAGTTTTACGCTGAGTCTATCTCTCAAATCTTCTCAAAGGAAAAGCTCTCAAACGCTCTCGAAATTCAG  
GACAGCTCTTTTCTGTGTGGCGCTTCCATGGAATTTTCAACAATGTCCTTCTACAGAAAATTTTCAATCGTTTCGAG  
AGACTCTGTCTCGACTCTGTTGTGTATGGAATGCCAGTACGACAAGACAACAAAAGGAGTTGGAGGCAACTGCGTTTT  
CGCCAGTTCTTTGGAAGTGTCCATCGCGTTGTGGGTTCTGGCTGATTTTATAAATAATTTTGTGTTTTGCAAAAATAT  
TAGAGTTTCTTCCGATGAGTCTGAAATCCATGAATGTGGGTATGATTTCTTCTGTTTTCTTTATCGAAAAGGCAAC  
GGATCGCGCTTTTTTACCCTCTTTTTTAAAAATTTCTGACTGTTTTGCCGCAAAAGTCTCGAGTTTTTGTGAACTGCTCT  
CTCAAGAGGTTTTTGGCACCATTTTCAAAAAGAGACTCCGAGTGCACCCGTTCCGGCCATCGATCGAGAAAAAGAAA  
AATAATGTTCTGTAATAATTTTTATGAAAATATGGACATTTCTTGGCATCACAAAGAGAGGATTTGAGTCCGTCGGAA  
CAGACAACGAAACGAGACAAAGTCAAGGCTTTTTGAAAGTGAAGAAAGAGAAATGCAAGCATTGGAGAAATTTCCCCAC  
AAATCTGCTGGAATGGAGGCGAGAAAAAAAAGTCAAGGAGTGTGCTGACGCGGACTATCCGTTTCTCTCTCT  
CCTTTTTCCGAGAAATGTAAGGTTTTGTAAGAGAAAGCATAAGTTTTCTGAGTTCCGACAAAACAGAGGAAGCAGGC  
CTCAATAATCCACAAATTTCTAGAAAGCGAACTCTTTGAAAGTGTGAAAGAGAAATCCGCGCTTGGTCTCTCTGTTT  
CGTCAAGGATATGGACTCCATTTCAAGAAATTCGAGAGGACTCTTTGACTGCCCGGTTTTGGAAAAGATATGGGACC  
CTTCAGATGTTCCAGAAAACAGAGAAAAGTTTCTGTAAGCAAAAATGTCTCCAAACGAATGGGATGAATGGAGGCTCGT  
CCTCCGAGAAAAGCTCTGAGTTGGAAGGAGCAAAAGAGAAAGGATGAACTGCATCGCAAAGGGTTGAATAAATATTTTTG  
TTTTGACAAAAAATATTAACCAAAAATTTCCAGCTTTCTCTGGACCTATCCAGAACCAACTCCACGAAGAGGTTCCCT  
CTTCCGCGGCGGAGTATTCTGATGAGGGCGAGGCAAGAGTTTCTCTCATAGAGGCCAACAGTCTCTTCTGTTTCTG  
TCGGTATAAATTTGACAGAGACTTAAAGATGGAGCACTCTTCCGCAAGACGAGAGAACAGAGTCAAAGGTTCCCGTCT  
CGTCTGGTCACTCGTCCATAATGTCTTTGGTGGTTTTCCGCAATTCGGTGTATGCGCCGAAATGGCATCTCTTTAGCAC  
AATGTACTCGCCAGCGAGGTTTTTGGACCGCTTTTTATCTCTTTTATCGTCTCTTTCACTTCGATGGGAAGGTTCCCT  
TTTTGAGACGGAACCTTGCATGCCATACAACAGAGAGAACGGAGACTCGGCACTTCGCAAAAATGTTCCATCTCCCTG  
TAAAAATATACTTTGAATGAACCTCGTAAAAATATGTTTTTCTCTTCTGATATTCGGGAGTGAATATGTTTTTCCGAC  
AAAAATTTCTTTGAAACCTTCTTCTTCCAAAGGAAAGTTTTCAGATTTTTTATATTCCTGATCCCAATATTTTTT  
GGTTGTGTGCTGTTGTGAAACACTCGGAAAGGACATTTGAAAAAGAGAACCGCCACCTGTTGACAGCTCCGGGACAA  
TTTCTAACAGGTTCCATCGGACAGCTACCATGCAATGTCTGGGGTGGCGTTTGAATCTCCCATCGGTTACGGTCAA  
AACGCGAACGTTCTCCGGCACTTCTGAACTGTCCACGACGCTACTTGTCTCGCAGGGGGAGGGCAGAGCTTGCACACAG  
CTTCCCATCTCTTGTCTTTGAAACAAAACAAGAGACTTCCGTTTGCACATCTCTCTGTCAGTTGGGACTTTAGC  
CTTTCCGGGACGAGATTTCCCTGTTTATCTCTCACATCGGAAAATCTGGATGAATCCATCAGGACAGAGCACGAAAAA  
TTCCGAGGAGCCCAACCGTCTGCAAGCACCAAAAGCAGACTTCTTGTCTCTCGATAAAAAATTTCCGTTTGTACT  
GCATCTTTTCAAAAAGAGATGGAGCACTTTTTGGAGAAAAGAGAGTTGTTCTGTTTTTGCATTTGTTGGGAAAAATA  
TGCGACACAGAAAAATATCGGATAAAAATCGCAAAAAGGAACTGTGTGTACCATCTTCTCCAGATGGGACAAGGGATGG  
GACTTTTTCAAGAAATTTGGAAGGATCTTTTTCTCTCAAAAACAGTCCGAGTACAAATTCGGAATCTTGCAGGACCTC  
TTTTGCGAATGGGACAGAAATGGGCTCTTTTATTTCTGAAAACATAAAAACGGGACGAGAACACGGTCTTTTCAAAAA  
GGACGGCTTGTGTCTCTGATTTATGAGCAATTTTGTGGATGGCAACTCCATGGAGAGTACAAGAATATCACGA  
CAACGGAGGAAAAAGGACCTTTGCTGTACGCAAAAAGGAAAGCAAAACGGGAGAGCAACACATTTGAAACAAAAGGAA  
AAGTCACTCGGGAACGGGAGCATCGACCCTTTCCGAAAACATACAGGGAGACAAAATATGTTGGTGGGAGAAATGGCGTCATG  
CAAGCCATCACAAATATTCGAAACGGAGAACTTCCGCGGTTGCAAACTGCTATTCAGAGGCAGGAAAGATACACAAGCAT  
CCAAACAATTTACAGAGGAAAAAGAAATCTCTGAATAACAACATAAAAAGGTAAGATGTCAGCTTACAGGCAAGGATCGA  
GAATATCAGAGACTTTTTCCATCGGTCAAACAGTTGAGAATAACACCTTCCAGCCGACCAAAAAAGACTCAAGGCAAC  
ATTTGTGCTCGGCGGAGAAAGAAAGTTGTGCACTTTGGACAAGAGGTTGCTTACGATTTTCGATGGAGCGCCAGAAA

CAAAGAGGAACGCCTTTCGTGCAAGACATTCGAAAAATTCACAAAGGGAGAACTGCCTATAAAGTTCCGGGAAGCGCA  
AGTTCAATTCGCGTGGGTGATCCTGTGGTAAAAATATTTTAAAGAAAAATATGAAAAGAGTTGAGTGTGTTGTGAGACAAG  
TTGTTTCGTATGTCTCTCATCAAGGAGTTTGAAGTCGGTGTGGGGAGTCGTCTCGCTTTTAAAGGAGACGACTTTTT  
TGTCTACAAACGTCGCGATCGTCGCTTCGACATCTCCAGCTCGTCGAATATGAGACGCAACTGGCCCTTGGAAAGAGGT  
ACAACGACGGCTTTGTGAAACCTCTTCTCTGAGATGAAGGATGAAAGACTCTGTTTTCGATGGAGTGGTTTCAAGGG  
AGAAAGATTTTGTGAGAGGGTGAAGGATGTGGACAAAGTTGCGAAAACTTCTGTCTGTTTTCAGGCGATGGAAAGA  
TGAAAGAGTTTATCACCAGGATCTTGAATGCCGCAACATCTTTGGAAAGAAAAACAGATGACGTAATAATCATCGACT  
TTGGGATGGTAGTCAGGTACGAGGACGCACACAACGAAAAAGGTTCCGTCATCTTCTCTTCCCTCCCAAAGAGCTT  
GAACGCTCGATGAAATGCTGTCTGATGACGAGGGAAGAAGCATCAAAGCACAATTTGGGCTCTGGAGATTTGTT  
GCTTCAACTTCTCAGCAAAAGGATGAAGTCGAGAGGGTGTGATGGTGTGACGGAAGAGAGGGCTTCAAGAGGATGTCC  
GCAACTCTGCGATGGAAAACAGGGATTACAGAAAGGGCCATCTTGCAGCTCTCCAAAGAGAGGCAAAAGACAGAGAA  
ATTTTATTCGAATAAAATTTCTGAATGGGAAAGAGAAAAATGTGAGAAAGAAACACGTTTTCGCGTTTTCGTCGACTTCACG  
AATGCCGAAATAGCAACTTACGCTCCGACCCTGTCTGTTGGATTTCCAAAGAGAGCTGTATGCAAAAAGCGAAAGCAG  
AGCGAAGCATGTCTTGAATAAATTCAAAAGAGAATTCAGTGCCTTATCCCTTGAACACCCAAAGAAATTTTCGTGGAG  
TTTCTGTGACCTCCCTTCTATGAGAGCGTTCATACGGACGGAGAAAACTCTACGTTTGGGACGACTTTCGTTTCGAA  
CTTTCCATCGACGAAGCGGAACTTGTGAGTCTCTGTGCAAAAATTTCCGCTTTCGGCAGAATACCAGCCATATCTCAC  
CAACATTTCCGAATCTCTTTACAATTCGACATTTTTTTTCTTCTTCTGCAAAAGGAAAACTTATGGAAGAGTTTCTTG  
ACGATTCAGAGCTCGCTTCTGTGTGTGAACGATGAGGGGCTTATCGAGTCTTTGAAGAAAAGAAAGGAAAAACACATTG  
ACAGTGTACGATATCAACAGTTGGAGAAAAAGCGCTTCTGTGAGTCAAAGATGCCAGGAATGAACGTCCTTTTGAATGG  
CGTTCAATTCGAACCTTTACACCAACGAAATTCCTTCTGTGCAAAAGTTTGTGCAAAAAGTGGGCAAAAGAAATTTCT  
TCTATCACCAAGTCAGCAAAAAGAACTTCCCAATGTGGAGGAGCTGTGGATAGGCTCTCACCTTGCAGCGGCAAGGTG  
TTTTATGAGGGTTTCCAAAAATTTTCATAACACCGGAATCTCTACTACGCAAAAGAGGTTGGGCTCCTAAAAATTCAC  
GTACGTTCTCATCACACAAGAGTTTGAACGCGCGTTCGTTCTTTCGCAAAACAGAGCTCCAATAAACTTTTCAGGC  
AGAAATAAATATTTCAAAAGAAATTTGAAAGAGATGCAAGGTACTACATTTGTTGCTGTGACCAAAAGAGGGGTA  
TCGGAACAAGGGAAAAATTCCTTGGAGTTTGCCTGAAGACCTCGCGAGCTTCCAAAGGATGACATTTGGAAGGACCATA  
ATTTATGGGAGAAAAACATCGAATCTTTCTGACTCAAAACCCCTAGCGAAAAGAAAGGAAACATCATCGTGTGAGGAA  
CAAATCTTTCGAGTGGAGGGAGCAGAGTTGCGCACAGCATCGAAGAAGCCTTCTCTTTAGCGCAAGGTTACTGTGCTG  
TCGTTGGTGGCTCTGAAATTTACCGCGCAATGTCTGGAGCAGTTCCCGAGCTCTGCCTTGGCGTTTCGAGAACACTGGTT  
TTGAGCAGCCAGAAAGTGGACGCTTGGTTTAGCGTCAAGGAGACGAAATACAGTTATCTGATAAAATCCTCCATAACTT  
TGAGATGCAATGCTGTTCCGGAAGAACGAAAGGGAGATGAGCTACTTCTCTTTTGTCTGAAGTTCTTCACTTTGGCG  
AAAGGAGAGACAGCAGAACGGGACAGGAACGAGGAGTCTCTTCCGACCAACTTTTCGTTGAAAAACATTTTCAGAAAA  
TTCCCTCCTCACAGTCAAGTCAAGAAAGTGGCGTGGGGTGCATTTCTCTGAACTTTTGTGGTTCTTTCTGGGTCAACAGA  
TTCAAAGATGTTGAACTTCGAAACAACATCTGGAAGAAAAACAGTTTCGAGAAAGTTCTTGGATGGAAGAGGTTCTAA  
GTTATAGAGAAAGGAGACTCGGTCCTATCTACGGGTTCCAAATGGAGACATTTGGGGGCAAAATACATCGACTGCGACACA  
GACTATCGAGGCAAGGAAACGGACCAAAATTCCTTCCATCCTTTCCAGATTAAGGACGAAACCGACTTCGAGGAGGATGTT  
GCTAAGTGTGTTGAAACGCTCTGACCTCGACAAAATGTGCTTCCACCGTGCATTTCTTTTACAGTTTTATGTGAGAG  
GACAGTTTCTGACTGTACTTGTATCAAAGATCTGTGACCTCGCTCTCGCGGTTCTTTCAACATCGCGAGCTATGCT  
TGTCTTTTGGACATCTCGCGAGCGCTTTCAGGAAAAACAGCGGGAACTTACCATGTGCTTTGGAGACGTTTACGTTGTA  
CGAAACCAAGTTCGACTGCGCACAAAATGACAGAGACTTCCCATAAAAGTCCCAAGTTGCGCGTCCAAATTTTCAG  
ACGAGACTCTCTTGGTCTTTCAGAGAAAGATTTACGATGGAAGGATTTCTCTTGTGGCGCTCTCAAGTTTACATG  
GCAGATAAAATATTTTCAGAAAATATTTGAAAGAAATCTGTCTTTTCTTCTCTGAAATTTCCAAAGAGCTTGCATAC  
CTCGAGCTGAACTTCTTGTGCTCGAAGAAGAACTCTTTCACCTCTCGACTTCAAGCATTTCTTCTGAAAG  
ATGAGCAAAAAGTGGAGATTTCTTGTGTGGCGCAACCCGCTGCTTTGTCTTCTTGGCCATCTCTTTCGCGAGTT  
ATTGTCTTCTGTGCGTTCAAATTCAGAAAACAGCACCTTCTGTATTTTATAAATGTCAAGAAACAAAAGGTCAGGAGCC  
GATAATAAATCAAACCTTTGTCTTCCGCTCGTAAACTGTATGATTAAGGTTTGGAGACATCTATCTTGTGCTC  
CTACTCGAGGAATCAAAGAACACGAAATCCTTGTCTGTGAGCAACTCCGATTTTGTTCGGTACAAATGGTATGGA  
GACCAAAAAATACCTTCCGATTTTTCGTCCTTCCAGAACCTTTTATAGAGGTGAAGAGCGACTTCACTTCTTCA  
AACGAAGAGGTCAGGAAAGAAAGACGAGAGCGAACTTGACGTTGCAACGCCCTCGGTTACGACACGAGACTCGTTGTG  
TACAAGTCAAGAAGTTCAAGAAAAGTTTCTTGTGTTGAGAAAAAGAGGAACTTTCCCAAGATTAAGGATGGCATT  
TCTCGTTCAAGACAAGACAGAAGACCTTGGTGTGTCGAGACAAAACCTCAAACCAAGAAAGACCGGACTTTGGCGTTTCA  
CGACGAGTGGTGTCTGCTTGTGTTGCTGAGGAAAAAATATAGAAAGGAAGAAGATGGCGTGGTTATCACAGGTGGT  
ATAAAAGCCAGATATGTTCTTCTATCTTGGATGTCAGAGATTTTGAAGATTCGTCACGTTTTTTTACGAACCTCT  
ACTGGTGTGTTTTCGAGGACTACGCGCAATGAAACCTTACGACTTTTCTCAGGCTCTTAGGTCGTAACACATGTG  
CAAAGCAGTCTCTTCAATCCAGAACTCGGCATCTGCCATCGAAATTTGACTCCAGACGCGTTTTTGTGCTTCTCAGA  
ACGAGTACAAAAGACAAAGACAACAACAACTCTGGAATTCGGAACCTCGTGCCTGTGAAGAAGTGGGCTTGGC  
GAGTGCATCTCTCCGCAAGTCTCCATATCCGCTCCAGAGACGCTGACCAACGAGAAGAGCATGAGCAGACTCGACTG  
GATTTACGACAGACAGATACAGCCTGGGAGCATGCCTCGAATATCTTTGACGTTTGGAGGAGAAGAGAAGTTGCGAGTCA  
AAGAGATACACAGTTTCAAACTTGTGAAACAACAAGAGCAGGAGAAAGGCTTCTCTCTCAAAGCCATAGATTTT  
TTGAAACAACCTTAAAATATTTTGAATAAAATATTTTTTCTCTGACTTGGCATTGTTGGGCTAGAAATGTAAGAGGATG  
CGTTTTTCTGTGTTTGTGAACGCGGACGAAAGTTGTGTGCTGTTGACTCGAGAAAGGTTTCAAAGTCTACGACACGGA  
AACGCAAAAGCTTTTGTCTTGGAGGATGTGGAACCTGTGACGATGGTGTGAGATTTCTTCTCTCAAACATTTTTCGTT  
TTGTTGGGTTTGAACAAGAAAAAGCTGACGTTTTTGGAAACGAGACGAAAGAGAGAAAGCGCAGAGATTGCTTTTCCAGA  
GTCATACGAGTCTTGTGTTGGCAGAAGCAAGATGGTGTGTTCCACAGACGAAAAGACGTACCTGTACGACCTTGAAC  
TTTGAACCTTTTGGGAGGATACGAGACGACACAAAATCCCAACGGAAGCCTTGCAGTCAACAGCGACAGAGCGCAACACG  
TCTTTGCTTTTCGGAATGAAACAAGGATATGTTTCAATCTCGAAACCGCATATCTTTGTTGTTAAAGCTCACGAG  
GGAGTTTGGAGGTTTGTCCCTCAATAGGGAAGAAATCTGTTGGCCACGACTTCAGAAAAGGGAACGGCCATCCGCGT  
GTTTCGACACGACTCTGGAGAAAGAGTAGCAATTTCCGAAGAGGAAAAACAGAGACAAAGATTAACCACATTTTCATGTT

CAAAAGATTCAAAATTTCTTTGTGTGAGTTTCAGAGAGAGGGACGAGTACAGTTTTTCGAATGGGACAAAATTTCCAAAAC  
TCTGCTCTTTCTGATTTCTCCCGACCCCTTGAGTACTATGCGAGTCTGAAATCCTCTTGGTCTCTTGCAGATACCT  
TCATCCAAAGGGGATAACTCTCGTATCTGAAGTTCTTTCTGAGACATTTAGCGTGGACGAGTACGTTTCTGAATGCA  
TCGTTCCAGAAAACGAGGGGAAGCGCTGTTTTGGAACAGAGAAAATGATGATATTTTTATCCATAAAAATATCTAAAA  
TTTGAAACTGCCTTGAGTCCCACATTTGAGATGAGATTGACATGTTTCTTGGCCTTTGGGGCGTGAGGTCAGATT  
CATCCATTTTTATCTGGTAGAGGAGCTTTCTTTCCGCTCTTTGAACTCTTCTGGAGTTGGGAGGATTTGAAAAGTAGCTC  
TTCTGTTGCGACATATTACTTTTGGGAAATTTTGCAGAGTTTCCGGTCTTCCAGAAAGAACCCACATATTTCTGTCTGT  
TTTGAATTTTTCGAGAGTTGCTTCTTCTGCTCTGCGAGGAAACGTTGGTGGGCGTGTTCGCAAACTCGAGCACGCG  
CCGAGAGCCACAGCTCTGATGTTCTGTCACCTTCTTCTGTTTCCAGAGATTTCTGTTGAAAGAGATTTGAGGATGCGG  
TGGAAAGTTTTCAGAGAGAGCGCTGAACGCTATCAAAATCTCCAAGGCAGATTTTACCTTTGAAGAGACGAAAATGTTTT  
CTGGTTTGAATGTCGAATGAGTCAATCTTTTTTGTGGAGGATTTCTATGCTGAAAATATGCAAGTCTCGACTCTTTTT  
ATAAATGTTGTTGCAAGGGCCAAAAGTCTGTCACAACTGTAAAGGTCAAAGGGTGCATTTCCAAAACAAGGAATCT  
GTTCTGGAGCCAAAGCAGGTGAGGATGTTCTATGATGGGGAAAACAAGCGTAAAAGCTTTTTCTTCTTTTCTGCGT  
CCTTGAGAACTCTCTTTGTTTTGTGTAGAACGTCACAACTTCTTGGACGAGAGGAGAAGTTGTAGAATGTCAAGGAAT  
AAAAATTTTGCATCTTATATATTTTTTATATGTTCTCAAGCCTTTGTTTCGAGATTTTCGAGAGCCACATTTCAAAGAA  
ACACCTTGGCTCTGCTGTTCTCTCAAAAATTTAAAAGCTCTGGAGAGCTTCCAAAATTTCAAACAGAAATGTCAC  
ATCGAGAAACGAGCTCTGATGTTTGTACTCTCCATGTTCCCGAGAAATGTCAAAACGAGGATGACGCCATTTTTCT  
GTCTCGATGAGATGCTCTCATAGTTTTTGTGGGACATGAGAACCACAAAATGCGCCGTTATTTTTCCAACTCTCT  
TGTTTTTCCGATGCGCTGTCTCCACAGACGACAGTTTTCTTTTGTGTGTTTTCTGTCACAAAATAATTCCGAAA  
ATTTTAAGGAAAACATCACCTTTAAAAGATAAAAATGTCCTTTGAAAATTTCTGACTGAGAGGACCTTGTCTGATGA  
CTTTTCAAGAACTCATCCAGTCTCTGCAACTACAAAAAAGTCTGGCGACACCGCGCTTCAAAAATCCGTTTCTGGAAG  
TCTGTTTTGTTGAGGATGACAAAACGCTCTTCCCTTTCTTAAAAGTTCTTCCGCTTTCGATAGAGCGTAAGTGGCAGA  
TTCTTTCAAAATCCCTGGACATAAAAACAGAAAACATCAGATTTCTTTCAGGCGACTCTTTTATCTTTTCTGTTGGATA  
TGGCAAAAAGTCAAAAGTCAAAAGTACTTTTGTCTCTTCTTCAACGTTTTTCGAGAAGTAAAACAGTCTGCGCAACAG  
GGCTTGTAACTATCCACAAATCTCTCCAGAGGCCACACGGCAAAACCGTCTTTCCACGAGCGGTTGTCCAAAAC  
AGATACCATCAACGACATTAATAATTTGTTGAAACAAATTTTAAAGAGCGCTTCCATCGCGACGAGAGCAAAGA  
CAAGGCACAGCCAGAAACGACACAGTCCCAAAAATCATGGCCATCCAAAATCTTTCGAGATTTTCTGCTGCTCTCGCCA  
AATTTGAGAGTCACTCAACTGCAAAAATTTATGTTGAAAAGAACCCACAAAGAGAGAAAGGTTTGGAGCAAGG  
CATAAATAATATTTTCAAAAACCAAGACAAAAGTAATGGCTACCAAGACAATTTCTGCTGATAACCTTTGCGTTGTGTA  
TTCCGAGGACACTTCTCTCACCATCGATGGAAGTGCAGTCTGCTCGCATCTCTGAAAACAGGACCGCGAGAAAGGCTG  
TATCGTAATCGTCAAAAAGATGAAGGAGAACTCAAAAATCTTCCACAGCGTGTATCGAGAAAAGATGATGGCGGG  
TTTGCCATTTTCACTCGCAGCCTCGGCTATCTGGTGAACGTTCTCTGTTTCAAGAACGCTCGTCAAGTATCTTTCCCT  
TCCAGTCTCGTATTCGAGGAGAAGGAAGAAGAACTCCAAGATGGAAGTTTCTGAAATCCGACTCTCTCCCGCTC  
CAGAGGTCATCTCAAGCAGCTCCCGAAATTCGAGCGTTCGAGAAAGTTGCTGAAGAGACCGAGCTCTCTCGAAACACT  
TATAGCTGGAAGGGCTGATTCGCACAAACAGCACCGGCTCTACGAGCCCTATTTCTGCTACTAAAAGATTTTTTTC  
CAACTAAAATACTTTGTCGATGTTCCCTCTGACATGGCCGAGGCGAGACGTACTCGAGATCCGGATTTCTGGACTTGA  
ACTTTTTCTGTTAGAAATCTGGCTTTTTTCGAGAAAGTACGCTCTGTGACTTTCTGAAATTTTGATACCCAACCAC  
CAAGGAAGAGGAAAGTCTCTGTACGCGGATTTCTTTTTTGGTAGAGAATGCTTCTGATCTGCTTTGTGCTTCTCGT  
TGAGCTTCAGATAATCTGTTGTTGAGCCTTCTGTTGTCAGAGTTTTGCTGTTTTTTCGAAACTCTCAAAGGGGAGA  
AACGTTGACCATCGTTAGACAAAGAACAAGAAAATTTTGGCTTTCGAGAGCATCAATTCGTAATGAAACTCGAGGGA  
ATTCGCGTCAGAAATTCGGAAGAAAATAATTTCTGATTCAAAGAGAAATATGGGAGCAACAAGTGTACGGAAATCGGCT  
TTGCTTCTTTTGGATGGGAACGAAAGGAAATTCAGAGCCTCCACAAGAGGAAGAAACGCGAGAAGTTTCTCTTCTC  
AGTTCTCTCTCTTTGGTAGAAGTTGAAAGTGAAGAACTCTGCTGATGTTCTGGATGCTCTTTGGTGAATAATCCA  
CAGTTTGAACCCCTTTGAAGTATAAGCGAACTTTCAAAGATTTCTTCAAGATTTATTTTCAGAGAATAACTTTTTGCTCT  
GTTGTTGCTGAAATTCAAAGCCCTCGTGGTACAAAACATTTGCGAATAATAAGAGAGATGAAGCTCGCAACCGCGCT  
CTGTTTGGAGATTTGAAAGAGTGCAGAAAGAGGCGCTGAACTCTCGAAATCCAAGAGATGGACGAGCAACAACCTGCTT  
GGCTTGTCTGTAACGCAAGGGCAGCACACAGTGTACGTGCAAAAGCGTGTGTTGCAATCTCGATCCATCGAGATTCATG  
AAGGGGCTCCCAAAGAGAGACGATACATCTGCTCTTCCAAAAGACGATTTCTGTCAGAGAAATATTTGCTGGACATCT  
TGCTCTGAAATAAATTTTTATCTATAAAAATTTATGCTTGTCTGAGTGCATGAAAGGAAATCCCGTCCAATACGCTCCG  
AGCGCAACAAAACGTTGAAAACAACAGCGACCAACGTCATCAAAGTCAAGCTTTTTTACCCTTGTGTTGTAGAACCATTT  
GTGAGAGCTTCTCTGCTATTTCCACCACAAAAGTGGAGACGAAACCGCGCAACAAAGAGCATGAATACGACAAACAG  
GGCGGAACGTTATCTTTGTTTTGCGAGCTTCTTCTGACTGTGATGTTAAGCTTCTGAGATTTATTTCTGTTATTTCT  
GCTTGGGGTTCGCTTCAAACTCAAAGTTTCTCTGTCGCGTCTGCTAGTGTCTCGAAACGCTGTGAGAGACGGG  
AGTTTGGCTCCGACGCTGTTCTCGACGAACGAATTCGCTTCCGGTTCTGAGAGATTTCCATGACCGTTTCTATATG  
GCTTTGAGTAACCAATAATGTCGAAGAAGAAGTGGGATGTACGTTTTCTGATAGTCTGTTTCTGATACATGCTGGGCATT  
GAGCCAGCATAGTTTCTCGAATAACTTGCCTTCTGTCAGATATGGAACGTTTCTGCTCTCGCTCCCAAGGAGGGG  
CAAATATGTTCTGACATTAACAACAAACCTTGAATAAAAATAATGATAGGACTTTGTTGCTACTTTTTATCGCTTCT  
ACTTCTAGTCTCGTTCTGTTTTTTTTCTCGTTGTTTTCTTCTTCTCGAAAATCCGAGAGAGAAATTTGGAGAAATTTG  
ACAGAACAGGTTTAAAACGGGAGATGTTCTTCTTCTTCTGGGAAGACGTTCCAGAAAAGAAATAATCTGTTTTTTGACA  
AACTCGAATTCAGCCATTTGCCATGTTGCTCAAAAAGGAAGGGAACTTTGGCTTTGGGAAGTGCATTTGGCCAGGG  
AAAAAGAAAGGTCGAGACTCATTTGAATTTGACCAGAACTCAAAGATACAAAGGATACCGCACGGCCGATAGTGA  
GGATAGACAAAAGAACTCGCATTTTCCGAAATTTTAAAAGGGAGCAGAGAAGCACTCAACAGGCCGATGGACGACCGGATG  
TTCTCATACTTTTTTGGAAAGGAAACAAAAGAGCAGACTCTGTGTTTTGTTCTGAGCTTGTGTTCTGACATAAAGGACTC  
TGCAAAAAATAAAGAGAGACAGAGAAACGTCGAAAGGCGTTTTCCCTTCACTTTTTCTGAAAGGTTTTGAGGGAATATACG  
TTCGACCAAGAAATTTTATGTTAGTTAGTAAAGATCAAGAGATCGGTTTGGGTTGAAAAGTTCAGTACATTTGGCTGGAGA  
AAACGCTGACACGCTGTATCTTATGCCAAAAGAACTACCCGCTGTCGACAGCGAAAACAATGTTGTTCAAACGCTGAGGA  
TATGATGGAGACTGCTGGCTTTTTCTACCACATTTGAGCTGTCCATCAAAAATCTTTTGGAGTGGCGGACGCTTGGCC

AAACAACGCCGAGAACTCTTTACAAAAATATGGACCTTTTCTAGTCTCAGGATGGAAGGGAGAGACAAAAGATGGTCAAAA  
TTCCCTCGTGTTCGGAGCTTTATTTGGATGGGGAAATTTACAAAACTCCAATTCCTTCGCAGTTTGTGGGGCAAAAGCCA  
AAAGACGTGAAATCACCTCTCGTCTCTGTGAAGAGCGGAGAGACGTACAAAAATTTATGGGAGTTTGAAGCCAAAAACAA  
GGCGTCGAAAGACACGATCGCAAGAATCCATCAACAGTCTCTCGAAGGAAAGGGTCCGTACAGATATTTTTGGCAAACCTT  
TCAAGGACAAAACAGCACAAAACTTGGCAGGCAAATCTGTCTCTCTCTCTTTGACTTTTGGTGTCTGTAGTGACCACGT  
TCAGAAGAGATGCGAAACCGTTCCGTGAAGCGGTACTTTATCGAGTCAGAGATCCGTTCGGTAAAAAAGTCTCGTTCGTG  
TCCTGATAAAATATTTTTGATAAAATATTTAGTACGAAGGGCTCATGCCTTGTCTTCTCGTACTTTGCGAGTTCCTT  
CTTGTCTAAGTTTGGCGAGCTGACGTTTCGTCAAGCTCTTTTGAGATTTCTTGGTGGGCTTTTAGCAGCGGAAGGCTTTT  
TCTTGGGAGCCTTTTCTTGGTTCGCTTTCGAAAGTATTAAGGCTTTCTTGGGACGTGAACCTGGACGAGACTGACACCGGACCA  
GAGAACACGCCCTTCTCAACAGTGAAGAGAGCGGCATCGTCTGAATGGCGCGCATGATGTGCTTGACAGAGATACG  
AACTTCTTTGAATCTCTGGCGGCTTACCCGCAAGTTCAATAATCTCTGCATAAAATATTCGAGAGCAGCGGCAAGAG  
CGACAGAGGCACCTCCGAAAACCGGTGCAAGCGCTGTGCTCACGAAGGACCGGCTCAGAACGAGCAACGGAAGCTTC  
AGCTTGGCCTTTGAACTCCTTGAACCTTCGAGACCTTTGACGCTTTGAGCTTTGAGTCTGCGACAGCCTTTCTCGCTTCGAAGC  
CGCATGCTTCCGAGGCTTTCGCAAAGAGGCTCTCTGCGGAGAGAATCACAGCTTCAGCGCTGATGGTTTTGGTACCCT  
CTGGCAAGAGGGTGGCAGCGCATGTGAAATTTCTTTCCCAAGAGACCGTGTATGTGTGAGTTTCAGCAAGAGCTTCG  
GTTTGAACAGAAATGTCCGGATGGATCTGAGAGAGCAAGCTCCTCAGACCAAGACGGAAGTTACGCTCTTGTCTCTCTT  
GCGGTGGTTTTCTTCTTGGTTCGCTTTCGAAAGTATTAAGGCTTTCTTGGGACGTGAACCTGGACGAGCTCAAGAGGCGGCGGATTA  
TTACTCGAAAAATTTTTCGTTCAAAGTTTTCTCTGTGCGAACTGTAATGTCAAAGGCAGCCAAAAAGTCAAAGTCTC  
AACAGCACGGTCTATCTCGTCTTATGTCTCGGAGGGGAAACGCAATCCCAAGGCCACACGAGCACTCTTGCGA  
AAGCCGGTTTTCTCTCAGCGACCGATGACACTGAAGTGCCATCCGAGGTTTTGTTCCGATGAAGCTTCACAACTTTT  
GCAAAAATCCTTCTTCCGATGACGCTCGCCAAAGAGGAAGACCTCTCAAGGGAGACGTCAAGAGGCGGCGGATTA  
TGCATCTGCCTGTTTTCGCAATCCCAAGGAATCTGGTGAAGGGCTCTGTTTTCTCTCTTGTCTGTCAAAAGGGT  
GCCGGTTCTCCGGTTCCGGTTCAGACACCAATTCGCAAGAGGTGAGAAACAGATGAAAGTCTTCTGCTCATCATTC  
CAAGGAGAGTTTCAGGACGATGGCAAAGGAAATTTCAAAGAGGGAAGTTCAGATCCAAACACTGCTTTTATGATGCCTTTGACAGACACAAGAAA  
ACATGCTCCAGGTCAATGTCGAGAGCTGCACTGTCCGCTTCTCGAAAAAGCACTTGTCTACCTATGAAAAAGATAAG  
AAGAGGGTCACTCGAGGATATCGAAACCGCATTCATGCTGGAACATGGTCCGTATAAGCACAATAACAATATAAAT  
AAAAATGTCGAGCATCAACTCCCTTCTGACCTCATCGCATGATGAAGAGTTCCATCGACAATGACGTGCGAGAGCTTCA  
AAAGAAATCGCTCAAGTTCTGCTCGGAGAAGCTTCAGATCCAAACACTGCTTTTATGATGCCTTTGACAGACACAAGAAA  
ATATTTTGGATAAAATATTTTATCTCTTCTTCTTCTGTCAAAACTTTCTTCTGGCTGAAGAAAACTCTGCGCTGC  
GTCCGATCCGGGTTGAATCTGCGCATCTCACAGCCACAACAACTGTGACAAGAGGTTCTGTTCTTCAATTTCTCTCT  
GCTGTTTTCTTCTTCTCGAGTTGTTCCATCAACTGCTTCTCAACTGGCCAAATGGCAAAGTCTTCTCGGAGTTGA  
CGGCGAATTTCTCTCGTTTTGTTCTCAGACGCTGTGAGAAATTTGCAAGTGAATCAACGGCTTGGTCCGGCTTTCTT  
TGGGCTCTTCTCGTTCGTGGTGTGACTTTCTTTCCGAGAGAAACGGTCCGTACTCGTAGTGGTCCATGATATCGC  
ACTGATCTCAAGTGTGATCGCACAAAAGAAAAATCCCTTTGCGTTTTTTTGGTCAATCTTCCAAATAATATTT  
TGTATCAACAAAATATTTAGTAACTCAATGTCTTCTCGTTCAACCAGAAAGCTTCTCGTAAATTTTGGCTTTCT  
CCTCCATCCGAATATCCGGCTTGTCCAACCTGAATTCGAAAACTTTTGGAGTGAACCCGCAACTGCTTCCGATTCGCA  
TGTCCCGCTGCTTGGAGAAGTCTCGTTTTCCAAAAACGTAGAGAGTTCATAGAGAAGGTTGAACCTGTCTGTGACCT  
AAAGTTGTCCACAGGTTTGCAGTTCTCGGTTGGAAGGAGAGAACCTTCTCTTTGCTTTTTCCCTCTGTTCTGTTCTCTT  
TTCTAGTCAAAATTTCCCAATAGTTTTTCAAAGAACTCTCGAAGATGGGAGCAAGGTCCTTGTATTTCTACTTCTGT  
TTCTGTTCCCTCCACAGCAAAAAGTCTGACTGCCGTCTTGCAGTAGAGGTAGTGAAGGGAAGGCGAGTGCCTCGCCATT  
GTCCGGCTCTCTTCTTGTAGTTTTCTTCTCGAGTTCAAAATCTTGGAGGGAAGAAAGAGCAGTACATCCCCAAACA  
AGGACTCGGAGACGTGAAACTTCTTCTTGGAGTTCAGAAGAGACAATCTCCGGCTTGGGACAGAGGATGGGAGTATAG  
AATCTTCCAATGCTTTTCTGTTCTATGGTCAAAGAGTCCATTTCTGCTTGTACTCTGCTGTTCTTTCGAACTTCT  
CTTCTTCCAGAGAGAAAAGCTTCCCAATCCTGGTCTTACCAAAGGATTTGTAGAAATCAGACTGAGACATAACAGAGA  
ACTCAGGAGAGCGGGAGGTCGACATATCTCTTCTGTTGATGACTTCTCGAAGAGACGAGAACAGAGTCCGGT  
GACGAATACCAGATGCCAGCCATCGTTTTGATGTTGTTGTTGAGAGTTCGAATGTTGTTTTGTGCAAGAAAAAGAGT  
TGGTTTTCCGATAAGTAAAGAGATTTTTCAAAGGAGCAACAAATTTGGGTGCGTACGTTATTTATGGATTGGG  
GACCCGAACTCCGAAACGCTATACTGGTCCCGCATATGTGGAAGGCTTTTGAAGCGCGCTTGTGCTCCGCCACAA  
TATGTATACAGAGATAATATCTCGTCCGTGTTGCAACCATCAGTCATCGAGATCGGAAGAGGAAACATCGACAACAT  
TTACGCTGCAACTCAGCTATGGACCGATAAATCCTTGGGACAACCTCGCGCCGACCGGCTCCATGCAACGACCCAG  
AAAAATGATGGCATAGGGTCGACGAATTTGGCGAAAATGGTGTAGATATGGGACTTTGTAACCAATAAATACTTTTACTT  
CAAAAAATATTTAGTGTGACAAAAGGCCATTTTTAGGGTCAACACTCGATGGAAGCGTTCCCTTTCGTTTTCCGCAA  
ACGTCTCTGACCACTTTGTTGCAAGTTTTTCTCCGTATACGTAACAGAGAAATACGCATCGAGCTTTTTCTTTCC  
TTCTGCTTGGGCTTTTATGTAGAAAATATGGCCTATGTCCTTTTTTTGGATATGCCCCCAAAAAGGGCGCATAAT  
CAGACTCGAAAACAATGCGTGACACCTCATTATGCAATGTCAGTCCAGAGTTTTCGTTGTGCTCTCTCATGTGCTCTCCG  
AGTTTATGTTCTTTGGAAGTTCGGAACCCGCAAGTCTCGCATTCGAAAAGTTCGGGATTTTTATTGCTTCCCATTTTTAC  
ATACGTAATAATCTTGGCTAAACTGTTATTTGAGTTCGGAATTTGGGAAATTTCTCGTCTCCACCCTTGTGGCGAAAGGT  
GTCGCTTTTTCGACAGCAAAAATATGCTGATGTCAAAAGAAGAAGAAACCTTGTGCTTCTGTTTTATGAAAGAAAGATAGAA  
AATGGGAGAGTTGCTTCCGATGCCCCAGGAGATACAAAGGGAATATTTTCGTTAGAAACGCAAGGGTCAAACATCGC  
CACTGTATTCTTCTTCTGTCGTCACAGAAAACTTGAGATAAAAGACATGAACCTTTCTTGTGAAAGAGTTTTCTGTCA  
GCAATGGAGGCGTTTTCAACATTTTGAACAAAATAAGACCAGGACACTCAGTCACATCTTTTTTAAGTTTTTCTTTC  
CAAGAACCACCATTTCCAAAAAGACTCGCAATGGACGAGAGAAATGATGGGTGTTCTGTCGACATATTTTTGTGTTTTA  
TTGATGCTGTGTCGAACCTACATAAAGTTTCTCATCGACGCAAGCTCTGAGTTCCCGTTTTGTGCTTCTTTTTCGCTG  
AGCTCCAACCTTTTTGCTTCTGATGCAACAGCCAACTCAGAACAAAAGAAAAAGTCTTTTTTGGACATGATATACTT  
GTGTTCTGTCACGAAACCATCTCCCTTCTTTTTCTCCCAATGCTTGAACGTCTCAACGCAAGACTTTCATCC  
AAGAGAAAAAGACAACTCGTCTTGGCGTCCCTGTAGTTTTTCTTTGGAGATATCCTATTCAAAAACATCTTTTCTCT  
GTTTTCGAATGAAACACTTCTGTTACGCAAAAGATGTTGTAACAACCTTCTGGAGTTTTTTCGAGTTTTTCTGGTGAAG  
CGGCAGAAATTTTTCGAACGCAAGCTTGTGTTCTTGTGTTCTCTGTGCTTTTGAACCTGCTGTGGCACCCAAACATCGA  
CCTTGCAGCATTCACAAAATCTTTCGGGAAAGGATTTTTATTTTTGAAGTTCTTTCTGCTTCCCGAGCGCATGTGA  
ACATGATAGTTGCATTTTATGGTGTCTCGTATCGACAAGCATCGCAAGAGAAATTTTTCTGGCTCTGTTTCCGCTTTCT  
TGCTTTTTTGTGTTTTCTTTGTTCCAGGTTGCTGCGGATAGTTGGAAGAGTTCGTAACACTTATCGCACAACTTGCAT





CCACAGTCTGACGAGCTCTTGCCAAAGGGGTGCTTGGCAAAATGGTTCATGTCGTACCCCTTTGACAAAAGGTGCTGTTCA  
ATGAATTTGTAGAGAATTCTTTGTTGTTTCCGAAGAGAGGGTTTGTGTTGCCTTCCGGCGTACAGCTCTGGAGGAATTT  
AGGTAAAACGCTCTGGTCTGTTGATGCACTCTGAAATGAAAGAGGTGATTATCAACATCTTTTGTGGGACGTCGCAC  
CAGAGAAAAGCTCAAAGAAAATAGACGAGATGTTGGGTGCTTCAAGTTGAGGATGGGGTAGACGGATTTGTTCAAGAAT  
TCTTTTTCTGCAAAATTTATGGATAAACTTGTGGTGTGTTCAAGAACCTGAAATCTGTCCTGTTCTTTTGAACGACTT  
CAAAAGGTGCTCCGGACCCAGAGAGGGGTGCTCATAAAAAGTCCCGTATTTTGGCCCGTTTTCGTGGGAAAAGTGTACC  
TCATAAAAACGTTGTTGCAACGCCCTGTGTCGTGCTGTTGTCACAACGCTTTTGAACAGTCTCGCAACGTCGTCCTCA  
GAGTAGAGTTCTTCTCGCAGATTTCCGGCAAGAGCAGAAAGTCTCGGTCGTCAGATTTGAAATAAACGTTGTTGATGG  
CGGAAGTCTCCGAACTCCGCTCTTTTCTCGGGCTCTTAGCAAGGAGCGGACGACCTTGGACGTTCCCGTCTTTCCCA  
GAGACTCGCAAAATCTTGCAGGGAGCGAGTGTCTGTACCTTTTTAGTCCATCGAAATGTTGTTGTTCAAAAGAGCCATC  
ATTTGGTCATAGATGTCCTTCTTGGAGGTCCACGAGAATGGAAGTGGTGAACCGGGAAGAAATGGCAGGGTCCAA  
ATTCATGGGTAGTTTGTGGTGCATCATCGCGACGTTGGATATGAGACAATCCGTCATCACTTGCAAAAGAGAGT  
TCACGGTCGTGCGGCAAACTGTCGTGCGAAGCGTTCCCTCGAATGGAGTGAACCTCGTCCAGAAAAGATGACAGAAAG  
ACGTCCACGGTTCTTGTGTCGCGTCAAGGTTGAGCTGTACTCCGAGGTGCGAAGCTGCTTTGAAGCGCAGTGAACAT  
GGAAATATCATCTCTCTGATTCTCCAAAATATTTTCTTTGAGTTGAGAGCAGAGGGGGCGTAGAAGAGGATTCGAA  
TATTTCCAGAACTGAGAGTTCGTTAATGCTGGCCCTGACTATGTTGGTCTTACCTGTGCTGGAGGGCCGTAGAGGAGG  
ATTCCTTTCCGTTGGCTCTCGAACAACCTTGGATATCTTAGCGTGTGATGAGACCGTCCGAAAGTTCCTTTGAGCC  
TTCGAGACCGATGACTGTGTCGAACCAATCTCTGCACCTTTCTTCTTCTTGTTCAAAACATATGGGATGAAATTTTGC  
AAAGAGAGTCAAGTGTGCTCTCAGACGAATAGCGGTTCCGACGTCGCTTGGCGTTTGTATTCTCTCTTGAAGCTTC  
TCTGCTCTGACGAAAAGATTGATGGTCTTCCATCCACAGTTATCGCATCGACTCCAGAACTCGACAGTGCCTTAAAA  
AGAACGAGAGCGCAGAGTTGCGAAAGCAGACCGACGACATCTCTGCTGACTCTGCTGATGAAATTTCTCCGTTAAGCC  
TCGACCAAGTGTCTGAAAATGTCGGAAGTCCATAGTTACTTCTGTTTTTATCCGCAAAATATAAAAAACCTCACTCAA  
CAAAAGTGTGAATCTCACCTTCCAGTCTCCCAAAACGTTGGGCTTCTCTATCATCTGCTTTCGAAATGTCGCTGCG  
ACCGGTCATGAAACACAACTCCGTTGTTATCTGAAGGTCGAGACCACTTGGTGTACGTTGCGTTTCAACAAAAGAAC  
TTGGATTTCTCCAGCCATGAAAGCGGCAACGATCCGTTCTTGCAGATTTTGGCCCTGATCATCTTGTATTTTATCC  
TTGCTCCGTTGAGGAGGCGTTTCGAGACCTTTGAAAGTGTCTCATGGGAGCTAAAGATGATGATACTCAACCCATTCTTT  
TCTGCGTTTTTGAACAAGCTCTTGCAGCTGCTCATTTTGGACATCACCTATCATATGTTCTCGAGTTTTCTTGGC  
CTTGCCTACGTTTTTTCTTTTCTTCTTCTTCTTGCCTTCTCGAGACGCTCTCGTATTTTTGTCTCGCAGCTTCGAAAACG  
GGCAAGAGTGTGCTCGCTTCTTCTCTCAGCAACCAAGCGCAAAATGCAAGAACCGCAGAAAATGTTGACAACACGGA  
GAGAGAACAGGTTCTGCAAGTTCGGAAGCACAGATCGGACAGTCCGTTTTCGAGAGCTTCCGAGGCGAGCTTCAATTC  
TGCGATCTTTTCTGATGTCCTTCTCAACTCCCTCCATTTTTCAAGAAGTGTTTTTTGTCTCTTGTGCTCGTTCGTT  
TGACTCTCGTGAGGCTGCGATCTTCTCTTCTGCTTCTCGAGACGCTCTCGTATTTTTGTCTCGCAGCTTCGAAAACG  
TTCTTTTCTTCTGATCCCTCCAGAGAAGATATCGCTCCAGAGATGTTGCTGCGCTCATCATCTCCAAAACCTCAA  
ACTCACAACCGCAGACAACTCTCCGACAGGTTTCCGAAACACAGGTTTCACTCGAGAGGAGGAGGAGACTCT  
GAGATCGAGAGTACTCTCTCGGATTCGCGACTACAAGAGCGTGCATGACGCTCGGACCAACCGGAGGAAGATTTGT  
TTCAAAAACTTTTTTGTCTTCTTGTCAAAAAGTGTAGTGTGTCGTAATAAATGATGATAATGTTGGTGTGACAAAACCGA  
AAAGCAGGCGCTCCAAGCTTCCATGCTCGAAATTTTGAAGAGCGCCGTTGCTCAACACAAACCTTCCACACAAGGC  
CAGAACAGATTTCTGGCGAGAAAGTTGTAGAGAGTGTGTCGACACAAGAGCAATCTTTTTTTCGTTGCTCCCTGTTTTCT  
TCCAGAGTTTTCTCAAAAATCTGAGCTCTTTTGTGTCGAGCTTCTGTCGCGAGTTTGAAGAGCAATTCGCTTTTGGCATTGAG  
TGTTTTCTCCATGCAACATGATGGAAGCACTACAACGACGAGAGTGGCTGATGAACCGATGTCGATGTCCTGCT  
CCATCTCTTGTCTTGAACAAGCAAAAGGGCCGAGATTTGAAGAGTGTACGTTGATGATAAGAGCGTTGGATGTCCTG  
TCTGTAGGTTTCACTTTTCAAGAGCGATGAGAGTGCAAAAGCTCAAAGTTTTTCCGTACCCCGTTTATCGCCAAGAA  
GCCAAAGCGTGTGTTTTGAGTTCTGTTGTCCTCCGCAAGCTCTGTCGCGAGCTTTTTTGTCTCTCCAGTTCCATCATA  
GATAGACGGTTGCTTTTTGGTGTTCGTACAGCGGAATGTCAAGAAATCTGGGCTGCTCAATAGTCGATAGTCTCCATG  
TTTTGGTTCAAGAAAACAAAGTTGTTGTTCTTTTGGATTTGGTTTTTGGGAACAAAAAATCTTGTGTTTTACATTTGT  
AATGTCATCGCGCTGCGCAATAAACTCAAAGCAAGGGGCTCACCGAGCTCCAGAGGAACAAATAAGAAAATATTTTC  
AGCCAGAGACGAAAGTTTTGCAATACGCCAGAGTCTTGGCAGTCTTCTGGGAGAAATCAAGAAAGAACTTTTTCCGAA  
TTCGAGAAGCTCTTGTACGAAAGAGAGAAAGTTATTGCTCTTGTGTCGCTGAGAAGTTGCGAGTCTCGACACAAA  
GAACAAAGTCTGTTGTTCTGCGTTCCGAGAGTGGCACAGAGATAAAAAGACCAAAAGAGACCCGTGAAGCTGAAAC  
AGTGCCTCGTGGACATCGGCATTTTCAAGACGCCGTACAAGTTGGAACAGTTTTTGTAGACAGACGGGTTCCAGACTTGC  
TCTCGTATCTGGAAGAGACAGGAATTTTGAAGCGGACATTTCTCTTCAAAAAGACTATGTTCTTCCGAGACTTTCTCT  
GTGGCACACAAGTTTTTCAAACGACGAAACGAGCAGTTTCCAGAGTCCGCACTTGTCTCGTTGTTTGGGATTTTTCAAG  
ATAAAAAGAAAGTCCAAGAAAATCAAGTCTGTTCTCGGAAGTTTATAGCACCGTAAGAAGCTGTTGCTGTTCTTGG  
ATTCTTCTGTCATCAAAGGATGAAATTTCTGTCAAAAGAGTCCAGGAGTGCCTACGCTGACAGGAATTTGGGAGAG  
AAGAGGACATTTCCATCTCTGGGAAGGAAGTTCTGTTCTCAGCCAAAGGTCGTTGATGCGATTAGAGAGCCCGCATCC  
GACAAAAGAGACAATGCCGAGATTTCTTCTGATATTTGGCATTTTTCCGAAAGAGGCGAGGTTTATCCACCCATCCCA  
GATTAGTCTCTATGGGCCCTCCCTGCAATACCGGTACAAGAGGCAAAACATCTTCAAAAAGTTGAGAATTTCTCGAGTGT  
CTGAAGCTCTTGGTATTTTCTCTCGAGAGAAAATTTCAAAGAAGGAAGCTCAGCTCGAAAATGCTCGTTGCTCAGG  
CAAAAGGGGTTTTCTTCTGTTTCCGCGACGACATGATTTCCCCCGCAGAGCTTCCGCGAGCTCGAGATGAAGGTGAGAAA  
GGGAGTTTGGGACCAAGAGACTGCGGAATGCGTGGGGAAGGTTCTCGGCTCTGGAGAAAACCAAGGTCAAAGAAGGCG  
CTCTCGTGGTAAGAAGGGGAGAAGGAGAAATTTGAGAAAATTTGAGAGGAGCTCGACTCAAACATCCGCGCGTCAAGCTC  
ATGGCTTATGTCGATGTTCTCAAGGCTTGGATATGCTCCGAATCTCTTCTGCTCCCGAAGTTCTCGAATTTGT  
TGATGACCTCTCATCGCGCTGCACTTTGTTTGAAGAAAACGACAGGCGGAGTCTGAAAGCATGAAGTTCTTGTGGCTG  
CTGGAAGCCTTGAATTTGAACAACCAAGTACGAAGGCTCGCCGCAACTTGTCCAAGATTTCTTGTACTTTTTTA  
GAAAGAAAAGGCACTCAGCAAGAACAACTCAGACCAAGTTTTTTTTCAGAGCAGGGACAAAAGACTTTGGAAATTTCCG  
CGCTCGATGGCCGAATTTGTGAGCAGCAGAGATTTCAAAGTATCTTGTGGCTCTGAGACCCCAAGACAAGTTTGT  
ATTTCCGGTCTCAAAAAGCTGCGTTCTGTCGCTTCTGACAGCGACGTTGAACTTTTCAATGCCTCTTGTGCTGCCAC  
AAGTTTTATGTTTTGGGCGAGAGGAAATTCGAAGCATCTGTTTTGGACGGAACAGAGTTTTTGAACATGGCATCTTGCAT  
CACTCTCGTGAATTCAGAGGAACAAGGCTCCCTTGTGTTTGAAGTCTTCTTGTGAGCACCATCAAGAAAAGTTCAAAGG  
AGACGGTCGACAACATACCTTCTGGTCTTTTGGCCCTCGAAAAGAAAGGCATCATTTCCGAGGACGTTGACCCACAGAC

ATCTCGAAAGTGGCAGAGTCCATCAACCAAGGTTTGAAGTCTGAGAAAAGTCCGACAGAAAAGAAGCTCATGAT  
CCTCAGCGCTGTTCGCTCCACCGGCATCGCAGAGTCTGCAAGTCTCCAAGACCTTCGAAAAGGAAACGCTGCAAGAGCAAG  
AACAGAGAAAACCTTTTATGGTGACGGCGTCTCCCCCAAGAAAACCTTCTTCTGGCGTTTCTTGACGAAAGGAGCGAAC  
GGAAGTATTACTGGTCTCTGAACGGAAGAGAACGAGAGCAAAGAAAGAGTGGGATAGAGAGCTCTGTCAAAGAAAAGC  
TTTCATGAAGACCTCAAAGAGGCCAAAGAGATGCCCCAAAGATGTGATGTGCATCGAAGGAAAGGACGGAAAATCTAT  
GGCTCAAGAAGGGGAGACTCACATTTCTGGAACGGATAGACCTTGTCCATAAAAAATATTTTCTTACAAAATATTTACT  
AGACTCAACAACAACCTTTATCCCTCATGAAGGACTCTATCAAAAACGCCATCGCCACAGAGAGACGAGACTCTCTCCC  
GCTAAACAGCAGTTTTCAAACCTGCCCCAAACAAAGGCTTTGAAAATTTCTGCATAGACGCTTCTTGTCTTCCAAAAT  
CTTTGGAAAGAGTGTATGTCATAAAATTTATCCATAAAAAATATATCGTATCAAAAAGACCAGTGCATCGGTTCCCTTCCAGCT  
CCTTTGAGGTATTCTGTTGCTTGGACAAAGTGGTGTGTCTTGAATCCCTCAACAGATAAAGGACTCGGATGAGCGCA  
TTGAGAACGAGATTTTTCTTCCGTTGATTATACCTCGAACTTTCTGGCATGACCTCCCACAAAATAAGACAATCC  
CCTTGACGTTCTCGTCGAGATGGCGAACTGCATCTCCAGAAAAGTCTCCCCATACTTTGACGTTGTATTCTTTTTCCCC  
TTCAGTGTCTGTCAGTGTCTGTTGAGAAGGAGAACTCCCTGTTTGGCCAAACATGTGAGGTTCTCCGGAACGAGAGACT  
GAAACCTTGTCTTTGACTTCTTTGCGATGTTGGCGAGAGAAGCTGGAAGTCTGCCAGAACCGCTAAAAGAGAAGGCGA  
GACCCATTGCATTTCTGGGGTGGGGTATGGGTCCTGACCAACGATGACAACCTCTCACAGAACTCTCGAGTTTCAACG  
AACGCTTCCAGACGCTCCAATCTTTGGGACGATTTTGTGTCTTGTCTTCCAAAAGTTTGTCACTTATCTCTTTGAT  
GTTCTTCTTCTGTCGTCGAAAACCTTCCACCCAAAGGAAAGAACTTGGATGTTTTGTGAGCTTCCGAGCTTCCGAGCGCA  
CAGCGGTCCAATTCACCACGGTCGACGGAGCTTTGCGCCAGAAGCGACTTTCTGGACAGGTTTTTCTTTTGTCTTCC  
TCTTCTGGATGCATGAAATTTGACAAAAGGTTTATGACCTTATCTGTCCACAATCTCGTCAAATCTTCCGGAAG  
CTGTTTCTCAGAAAAGGCGAGATGTTGAGGTTTTGATGGTCCGATACGGCACAAAAGTTTCTTTCTTCTTCCAGGG  
AAGAGAAAATGGACAAAACCTTTGCGGGCTCCCTGGTGAGAACAAAGAGCGTTCCCTTCCCTCCGTTCCAGGAAAACAAG  
CTTGGATGAACCTCAACAGCTTTTGGTGCAGCAACTTTTCCCTCACTGACGATGCGAACGACGAGTTGTGCGTTTTGT  
TTCCCATATCGGAACCTGACTTTTTGACGTTCCGCTCTTGTCTTTCGAGAAACAACCTTTTCGACGATGTCCTCCCTCG  
AGCAACGAAAGACTGAAAGACAAAAGTCAAGAAGTTCAGTGTGTGATTTTTCCATATTTTTCTTTTGTGTATCAA  
AAGAAAAAGTTGGTTGATTTATGAGCAGCTATAGCTTCCAGACAAAACGTACCCAGAGGCACAGTTTTCGCCAGAGGGGC  
AAACTCTTTTCCGCTCCAAACTCCAGAGTCCGAATGTTTTGCAACGTGATGCTGTTTTCCCGTCCGTTGTGTTTTC  
AACTCTGGTGTACATCAAGCTTTCACAAGAAGAACAGCCGGTCCATCACAAACGGAGAATAAGTTGCCCTTTCGAG  
CGTCATCGCTTTTCCGACTGCACAACTCAATGTGACGCTTCTTCCCTCCGATCTGAGCGAAAACCGCTATAACAGCGCCAGT  
CACGAATTTTGTGTATTCTTTTCCGCGTACACGAAAAGATAGACGGAGACTCCAAAGACAAGAAGCAAAAATACTAAA  
ATTCGATACCGACCCAAGTAGATGCTTGCATATTAATATTTTTGAAAGCAAAAATATATCAACGGCAATCGGCAGC  
TTTTGTCTTTGCTAGAACGTACTTTCGAGTAACACACGCAATTTGGGGCGCACTTTCGCTTGTGGAGGATTTGAGT  
TGGGAAAACATAAATCTCCAGAGGTAACCTCGCTGTTTCTGGGTCAAACACAAGCCCTTCAATCTTTTTATTTTTCTC  
TCGTCCATCAAGATGGAATCTGCCGAATACATCCGAGGTCGATACAAGTCAATCAGAAAACCAATAGAGGCTCTGTCTCT  
TTCTGTCGAAAAGATTTCTGCTTTTGTCTTTTCCGTTGAACTGCAAAAACAACATTTCTCTTTTGGCTTGTTTTTGA  
CCTTTGACCGAGAAACGCTCTGTTTGTTCGCGGTGAAAGACTCGAGCTTTTTGTCGAATTTTTCCGTTGTGATATGATG  
CCCAATTCGAGCGCAACCGCCAAATATCATGCTCGTTTCCGCTCTCTGCTTGTGCTTCCATTCGGAAAAACA  
GAAAGTTTCAAATTTCTGCTCCCAATCACGACGGAGTCTCTTCCAGATTAATCTCGATGAATGTTGCCGTTGGTAA  
AGTTGTCCAAAATATCACACAAAACGGATCGAGCGTGTACTTTGACGAGAGCGAAAATGGGATAGCTTCTCTGAGCT  
TCGACCTTTTTTAAATGACATATTTGCTTACATCACACAACAACCTTTGTCTCATTTCGCAATTTTTATCTGGCAAC  
AAAAGTAATGGGTCTGCTATCTGGATTTTTGTAGTCACTGCTTTTCTGGCGGTTGTGGGAATGTTTGTGGGTTTTGGA  
TGTTGACTCAAAGTTTGTCAAGCAGCAGAGAACAACTTGTGAGACCTTTCCGCGCACATCAAGGAGAACAAAGTTTTG  
AAGGCTGACGGCAAGCCGAGATGAGCTGTCCGGCAGGGAAGAAGATGACTGTTATCGGCGCGGTCTATGAAATTTACGA  
CCCTTCCCTCGAATGCACAAAGCAACCCCTCACAGAGTCTGGAACGCCAAACTCTGTTTGGGACCGATGTCAGCCACA  
GTTCAAACGACCAACTCTCTGGTGTGGCGGAAGTGGACAATGTAGAATCCGAGATGTGACCGGACAAGTGGGAATGTTG  
TGCAACGAAAAGAGACTTGCAGCTTTGTGGTGCATGCAAGCTTTTGGGTTCTTACCCTTGTCTCCGATGCCGCTCCAGA  
CAGCGCAGAAATAAAGACCTCCCAAAGACTCTGCCGTAACAAGGATTTTGGGTACACGGCATCTATCGGTGCGAAT  
AAAAATATTTGAAATAAATATTTAGAACAGATGTTGCTCTCGAATTTGAAAATTTCTGTAATACTCGACAGACGGA  
GAGGTATTTCTCTCACAGAACCAAAACATCTTTTGTCTTTGATTTATCACAAACGAGACAGAGAACTTTGAAAGC  
TCCACCGTGTCAAACCCGCCATACATCTCTGATGCTGTGAGAGTTTCTCTTGAAGTCTCGTCTTCTCATCAG  
TCTCTGTGAGAAGTTCCGCAATTTATCATCTGCTTCTTCTCAGCAAGGACGCTTTCGTCGACATAGAGAGGATTTCT  
TCGAAACGACGTAAGAAAACATGGTGTAAAAGAAAAGGACAAATTCGCTCGATGCTTCCGATTTCTTTTGTGGATGT  
GTCTTGGAGAGGGGAATGGTGGTGGACAAAATCAACGACAAAACGCCAGTTTGAAGAAAGTCAAAGAAAGCTCGAA  
TTCTGCCCAATTTGGGTTTTGACATTTCTCAAAGGAAAATGCGCCAGAGAAATGCTACGCTTTCCGCGAGTGCAAAGA  
GAAACTCTCGAAAAGAAAAGAAAAGCAAAGGAGCGCATGTTTTACCACAACGAGGTTCTTATCGCTTCAAATAACCA  
GAAAGGAGCCAAAAGAAATTCAGGGACAACCTCTCACAAAACAAGAAGCTTTGAAAGTCTTACTCGCCCTTACGACCC  
TATGATTTTTCTCTCTCGTCTTTTGGAGATGCTCCTGTCTTGCCTCACTCTCATAAAATATTTTGTGAACAAA  
TATTTATCTTTTCTCTTTGTTCTCTCAAAAACCTTTGCTTCTCTGTTGTTGCAATTTTTGCTTTCTCGCCAGTTCCG  
AAAGGCTCTCTTTTACAAAACCTTCTTCTTTTTCTGGGAATGTGCGCCATGAGAGTTTTTCCGTTCTATCTCGTCGAGA  
GGAATGACGAAACGCTCTGCTGTTTCCGCATATTCGTGGGAGAGGACGACGCTCATCTGCTTCCGAAATTTGTGATG  
GAGGGCGCTTCTGTCAAAATATGGGCAGACGACCTTCCAAAGCGCTCTCCATCACCACTTCAATGTAAGCTCTTATTT  
TTGTTTCTGAAGCATTGGCGCAATTTCTCGAGGAAAGAAAAGACTCGAAAGGAAACAACCTTCAATCTTCTGAGTATCGCG  
TCGTCTGTCATCGAAAATCTGAGACGGGCTATGGAGAGTACGATTTTAAATGGGCAAGGTAACCATAAAATTTCTAA  
AAAATAGCGGTTTTGAGACGAGACAATGTTCTGCTTTTTACTGAGTACGCTCCAGCGTCAAGTAAGAAAATTTGAA  
AGAAAGAGTTCTTTCAAACATTTCTCAAAAACAACCTTTTTTCTCCCAATAAAATATTTCTCGAATAAAAATATTTTAT  
CCCAAGCTCAACAAAACCTCTCAACCTCGTAATCTCTCACTACCCGACGAGGAAACCTCGAAACGCTGTCTCT  
TTCAATCTCTTCCCTGAAAATTTTACAGTCACTCTTCCAAAGAGCCCTTTTTCTTTTGTACATCTCTCTCTCTCAT  
CGATGTTCTGTCTGGTGGCAGGTGAAAGTGTCTCCGCTTTCCGTTTCCAGAACAAAGATGACGCTCGTCTTCCGTT  
CCTCTTCTGCTTTTCCGAAACGCAAAATTTCTGATTTCTGATCTTCAAAGTCTTGTACTTTGAAAGCAGTCCGCGACCT  
TTTTTGGGGGTGATCACTCAACTGCTATCGCATCGCAAGGATGTTTCTTCAAACCTCGTTCGACCCATCTCTCGAGTT  
GCAGCATCTCTCGTACTATGGACTGTTCCGTCAAAACCTGAAACGATGCAATCGGGCAGGTTCCCGAGAGAAAGAGAG  
TCGAGTTCTTTTTCTCTCGAGCATGCTTTTTCTGTGCTACAATGTCGAAAATCCAGTATCCAACTATCTCTCTCT

TTTCATGGGGTTCTTTTCTAACGCTTCTCGTGTCCAGTGATAAGTTCGAATCTTTTCATTCTCTCCCATCTCCTCGCCAT  
GAAAAATAAAGTTCTCCATCCAGAACCATATTTCCCTCCCTTCAAAAAGTTCTGCAATGCCTTCGCGGATGTGCTGCAAG  
TGGACAATTTGCTTTCCCTTCGCGAAAGGAGTTCGACGTTTCTTCCGACAATCTGGCGATGCAACGAACTCCATCGAG  
CTTCGGTTGCGCGACTGACCCCTCCCTGAATTGGAACTTTTGGCTCGAGACTTCTTCTTTGGGTTTCATGATATCGTTGT  
ACTTTTCCGCAAGCATCGGAAGGAAAAATTTCTTTGTCTGGGACTTTTGGCTGTATCTTTCTTCTTTCTTTGAAGAA  
GCCATGACGTTGTGGTTGTTCCGCCAGCATCTTTCGCTTCCAAAATTTTGAAGCGAAAGCGACAGCTTCTCGTC  
GTCTTTATCCACAGCGTATCCCTTGTGAGCTGTTAATCCAAGAGCAATCCCTCTCTTTGACAGCTTGTCTTCTGAAG  
TTGTGGAGTTTGACCTTCCAACGTTCTTCGGCTTCGCTTGGTTTCGACGGTACGAACTCCCTCCAACATAGCCAAAC  
TCCTTGATGATATTTTCCCTTCGCTCCAGACCCTCCACTGAGCTGTTTCCGGTCTTTGTTGCAATAGAGAACAGG  
CAACATTTTCCCTTGAAGTCCAAAAGAAAAAATTTTCGATAAAAATATTTATGGGGCAATGCTGAGAAATCGTGTTA  
TAACAACGTAGCCGAATAACAGTGTGACTGCGCTTGTGTTGTGACGATGAGGCGATAATGCTCAAGTTGATGTCT  
GCTGTGACTGCGATGACCCGCGACCCGCTGTTGCTCGTTGGTTGGTTGTTGACCAAAGACAGAGATCAAAGAACCAT  
CCCGTTGCTCAGAACGGAAGATTTCCACCCTGCTAGTAGACGTTTGTGTTTCTGTTAGTGGCGAGAATGTTCCATTGAA  
AAAGATACACAGCGTTAAAAGACGGCGTGAGCGGAGTTCCAAAGGTGAATATCGTTGTTGGAGATGTTGAGGCGACGATC  
ACTCTCGTTATCGGGGATGTGAGCTTCTGAGTTGTGCGCTGTCGCTATAGTGAAACCTTGACTTTGTGCAACTATAAG  
ATTGGTGTATGCTTGTGTTTGAAGTAATGTTTGTGCTGTTTGTGCGACTTGTCTTGCACGTTAGTGATATTGGAGG  
TGTTTGTGCGACTTGTCTTGCACGTTAGTGATATTGGAGGTGTTTGTGGCGATGTTTGTGTTTGTGCGACTTGT  
CCTTGAATGTGGTGTATTTGAAGTATTGGTAGACGCTGCCCCTTGCACGTTAGTGATATTGAGGTGTTTGTGCGAC  
TTGTCTTGCAGAGTGGTAACGTCAGTACGAGAGTGGAAACGTCGACTGGAGAGTCAAATAATCAGCTGTGTTTGGC  
CCACCTGTGCCCGCAAGGGTCCGACCTCTCTCTGCCACAGACCATAATTTGTCCGTTTGAATGTACAGATTTTGGTCT  
GTCTTAAAAAACAAGAGACCCCTTGAAGGACTGGAGGAAGTACAGAGTATGACCCAAACGACGGGGATGTCCTTGA  
AAACCCGCAACAGACATTACAAGAATAAAAAATATCTTTGAGATATTTTATGAGAGAAAAGAACCAATCTG  
TGAAATTTACTTGCGGAAGATTTCCATCTTTTCCAGAAATTTCTCGAGCTTCTCTATGGGGCAGCCCATCTCTCGGAC  
GCATCAAAGTAGAAAAGTCCGGAAGATGAAAGTTTTCTATAAAAATGTTCTATGAGGCTGCGCTTCTTCAAAAAC  
TCGTTCTCCATTTTCCCTCCACTCCCTGTGTGAAGGGGTGGAAGGAACGACATCGGAGTTCCGCGGATGGCGCGGTAC  
CGAATGCTCTTAGCACACCCTCTTCGCAACAGCGTTCGAGTTTGTGACGATCACGAACGATGCGAAGCTCTTCAAAAAC  
GGACATCTCTCTCTTCTTGAACAGACCCGACGCTTCTGTTGATTATCTGGCGAATCTTCCCGTTTTTTGTTCATC  
CAAAACAGAGAGGACAGACTTCTTCGAGGTGACACGAGATGCGTACTTGTGGTCTGCAATATCGTGAAGTACGCGAC  
CAATTTCCACAACCTCTCTGTGCAAGTCCAGAGAAGTTTCTCCATAATTTTCTCGCGTGTGCGAGAATCTCAAAAAC  
TGCAATCCAGTCCGTTGCGTACATCTGAGTGTCTCATGATGGGTTTTCGATGCGGACGCGCTCTGTCCATTTTCCAAAAT  
ATTTTAAAGAAAATATTTTTCGATAACTCGAGGCATATCCAACTCTCTGTTTGTAAATATGCTCCTTTGGATTGCTT  
TGGTCTCGTCCGCTTCTCGTTCTTTGGCTTTTATGAGACAGAAGAGGAGACAGAAGCGTTTCCGAAAAACAAGGA  
CAATTTGTCTATCCGAGATCGGGAACCTGGCTGGTCTCTTCTGACTTGGAAAAGAAAATATTTGTGGTTGGTTTATCCTT  
TGGGAAAAAGAAAACCTCTGATTCGAAAGCTCGAGAAAAGGACAAACTATCTTGGAAAAGAGGACGACATGAAATTTT  
TAAGACTGTTTAAAGTAAGTACCACAGAAAAGAAAAGATGAACATTGACAGCACACAATACGTAACCTCGGGAGACGA  
ATCAGAGTTTTCGAGTCTTCTGTTTGGTGGACGACATGGTTCGACGAGTCAACTCTATTTGCAATCGTCCGATGCTTTCGACC  
TTGGAACAAGGGCAACTGAAGGATTAACAATCCTGTGTATCATGTGTGCTTGGCCATGGAGACTCTGAATTTATCCGT  
TTCCGATCCCATCACAAGGTGTACGACGGAATTCGCTCGTACACTGCCTTTTTCAAGCCGCTCTCGTACGCTTACAC  
TTCTGGCTCCGACACCATCACTGTGAGTCTGAAATTTCTTTCGCGTGGAAATCAAATCTCGTTTCTGGCGCTTT  
CATTCTCATGTCTCCTTCTCAGAATAAAAATATTTTTGAGAAAATATTTTTTACATGCCCTTGTTTGGCCAGTGGCGA  
ATCACAACCTGACCATCGGCTACTTCCGATGGGCGTTCCGAATCCGCTGTTGGCACGAAGAACAATCTCAGTCTTGG  
CTTGAGAGGTTGAGGGAGTTCAAATCTGTGCTTCTCCAGGAAGTTGCAAGTTTTCGACGCCAGCCGACCCCTCCCT  
CATACTGCATTTTGAAGGTGTAGCTGGAGATGTTCTGTGCGATGGGTTTCCAGAAAATCTTCAACCAGATTTGGGTACC  
GCGCCGTTCCCGTCTTCAATTCGAGGTTTGTGACAGTTGAGTGTCAAGCGTGAACAAGCAGGAAGACCTGTCTCT  
TTGATGGTATCATCTGAAGCGCAGCTCCGAGTTTCTGCGGGTCCATGATGAAAGGGAGACTTCTCGCACTTGGAGTATG  
CCGTTGTTTCTCGTCTCCGTTTCGTAATCCTTCTTTTCTGCTCTTTCGAATGGAGAAGGAGAAGCACAAAAGTATC  
ACAAAATATCAGAGTATGAAGCAGGACTCATCTTAAATTTGTTTATCTTTGGAGTTGCAAAAATAAAATCTG  
CTTCCACCTTTTTCTGTTCCCTTTTGGAAAGCTGGCGTTCGCCAAAACAGACGCGACGATTTCCATCTCCTC  
CTTGTCTTCGAGCAAAACATTCATCGTCCGAAAGGGGTCATGTTCTTCTTGAAGTACCGTCCATACAGGACCAAT  
CCAGGACCGCTTGAAGCTTTCGAGCGATGTTGGGCAAAGTCTCCATATCTTTCTTTTCAAAAAGATATCTTTGTAA  
GATGACGTTCTTACATGGTTTTCAGAGGGAATCCCGACAAAGCCCAAAAATTCGACGCGAGGTTTGTGCTTCTC  
CCAATCAATGATCGACGGAGAGATAACAGTCTCTCCTCGGAAAGAACGGAAGTTGTTCCGGAATATGCTGTGCGTT  
CCTTGAAGTCAAGAGAAGCTCCGATTGTTCCAAAAGTCCGAGATGTTTCGACACACAAGCAACCTGTATTCTATACC  
TGAACCTTCCAGGCTCTGTTCTGGGATGAATTCGGGCTTTCGACAGACTATGCATCGACATACCTTTGGGAAA  
CAGACTGTGCAAGGAGTTCGAGCTCCTCCAGATGCCAATATGCGAGTCTCAACGATTACTACAACCTTCAAAACAGACAC  
GACGGGACGGGTTTTCAGAGACATTTGAGCAGCTTCTCCGAGTACTATCCGAGCATCGAGAAAAATACGAAGTCTA  
CCATATCATGCCAAGGACAGCTTAGAGTTCAAGAGAGAGATTTCTGTTCTTTTCAAGTATAATTTTCCAAATGTAAGA  
AACGATGCTCGCAGGTTACATTTGCCAGAAAAGAACTCGAAGAAAACAAAACTCGCAAGTGACATCTCGTGGT  
AGAGCTTCAAAGAAGAAATTTGTAAACGATGTTTCTGGTCTTTCAGACCAAGAAAAGCACTAAAATTTCTAAAAGGCA  
CCTTTGCTGTAAACGAAATTTGAAGGAAGGGAATATTTGGAATCCAGGGAGACAAAAGGCAAAAGTTGGCGCTTTTT  
TTGGGAGAGATCCGGGTCAAAAACATAAAAATTCACGGAATATGAGTCTCGAGGATTTTGTAAATTTGAAGAGAGGA  
AAAAGTTTTGGGTAGTTTTGCCAGAAAACAGCACAGCAAGAAAATACAGAAAATTCGAGAGAAATTTTGAAGAGAGTGTGG  
GGCACAATACAAAAGAAATAAAAAGTTGTTCTCTTCCGAGAAATCTTCAAGAGAAAAGAACCTGTGCGGTTTTT  
TGGAATCTCTCTCGTTGGACATACAAGTGAAGGCTGAAAAGGAAAGTGGGGGCTGTTCTCGTCTGGAGATACCAAG  
ATATACTCGAAGAAAGCGGAGAAAAGATAATGACGACGACAGACTCCCTTTTTCGGAACTCGCAATGTTGTTGGACGAA  
TTTCGACGGATCTGTGATATGACAGACGCAAAAATGTTGGCTCGAGAAATCAAAGGTCATTTGAATAAAAATTTTTT  
AGTAAAATATTTATGTTCTCTGCTTTCATTTCTGTCTTCTTGTACCTCCGCTGACGTTGAGAGTAAAGGAGAAA  
AACCCCTTCTTCTTCGAAATTCGCGACTCTGTGTATACCAACTCTTTTTATACCGCAAGAGCCAGAAAGTTTTC  
TGCAACAGTTGCAAGGTTTCCCATCGGAGACTGCGCTGTTCAAGATGCGAACGACATAAAAACCTAAGCTTCGATG  
GACTTCTTGTGCATATGACCTTTTAAACAGTTCGACGCAAGCGCACATTTCTGCGTGCATCCGACAGTGGTTTCAAGGA  
CGAACCCGTCATGCTTTGTTGATCCAAAAGAACGGGCTCCCTCCCATCAGATGACACAACCAATTTTCTGACTC

ATCTCGCTCTTTTCCGCTTGTCTATCGCGAGAGAGAAAAGCTTCTCTTTGTTGGGACAGTTCCTTCCATTCTCTTTTA  
GAATAGATTGTAAGTAAAAGAAAAGAAAACAAAAAAGTTTTTATATGTTCCGTTCTTCCAACAAAAGAGATGAGTAAAT  
TTCCGGAAGTCGTTTCAAGAACTCTCCCGTGTCTTTCTGTGGAGCTCATCATCCCTTTCGCAAAAGAGAGCTCGCGA  
GGAGTTTATGTTGGTGGAGTATGGCTATGTTGGGAGAGCGTGGTTCGAAAGGAAAGGATTTATTTCCCAAGGCGCCATATG  
CGCTCACTCGTGGCATGAACCTCAACAGAGAAAAGAGAAACAAAGTTTCCATCGGAGCGAGGACAGAAAGAGCCATTT  
TCGACATTGACCTTCCAGAACATGGAGTTTTTCGAGAGCTTTGTTCCAGGCGAGACAGAACGAGGAGAAGACTATATC  
TCATATTCGAGAAGGACTGGGAGATTGTTAAAATATTTTAGACAAAATATTTGTTAAATGAGAGACTTTGTGC  
CTTTGACTCAGTACAAAAGAGGATTTGTTTTGCAGACTTTGACTTTATCTATCGTGAAGAGCCAGAAATTTATCAGAGAC  
ATTTCCGCTCTCGAAAAGAAAGGGGCTCTGTTTCAAGAAAGAAAATGACAGAACCCAAACTCTGTGGAATAAAGCTTGAAGGAAACCA  
AAAATACGCCTATGACATCTTTGAAAATATCGGGGAGACTCAAGAATTTTTACCTTGATGTCGACCTGAAAATGGAGG  
AAAAGCCAAAAGAGTGGGAATGGAACGTGAGAAATTTGAGCTGAGAGTGTGCGAGGGGCTGACTCGTCTATTTGTGCGGA  
GACTCAAGAGACCTTCCAACACGAGAGAGGGGAGAGTTGCGAGAATCTTGGCTTTTCTTCCCGAAGCGAAAATAAGCTC  
CGACAAGTAATATTTTTCTTGGCTTAAAGAAAATGACAGAACCCAAACTCTGTGGAATAAAGCTTGAAGGAAACCA  
CAGAGGAGTTCTCTATTGTGTGGGACGATGTTCTCAGAGCGATGGGAAAATGGCGAGATTCTGAAAGCGCAGAAGTGAGG  
GCAAACTTCTCGCAGAGTTTTGCGCAGACAAATTTCCCAGAGATTGAGAAATTTACAGACTTTCCGGAAGCTCTCGCGGAG  
TTACGACTTTGACTGGTCAAGTTTTGTTCTCTGAAAGACATCACTGTTGTCTCTGAACTCGGCAAGGGAACCTTTCGGAC  
ACGCTATAAAGTGTCTTTTGGGGGCGCTCTTGTCTCAAGCTGTTCAAGCTGTTGCGAGTGGAAATCGTTGAGAGAGGAAAGAA  
AAACCCATGGGCATCGAGGACTTTTGGACTTTTCTCTCGGCAGGTACGAAGCAAGATGCATACTCGACTTGACTCTCCA  
AAAAGAAAGGAGCATCCCTTTCCCAAAGTTTTATGACTTTGGAATCACCCGCGTGGCGGCAAGGTCAGAACCTACATTC  
TGATGGAGTACCTCGAAGTGAGACGTTGTGGGAGCTCGTCAAAGCGGCAACGCAAGAAAATGTGGAGGCTCTGACC  
AAAGGAATCTTCTGCGCTTCCGCTTCCAGCTCAAGGGATTTCTCAGCTGACATCAGTCCCGCAACATCTTCCCT  
CACAAACGCGGGAGAGTTAAACTCATCGACTTGGCTCTGCGTGCAGCTCAATGTGATGTTGAAATTTCTTGGCT  
CTGTGAATCCACAGAAAATTTGCAACACCTTCAAAGCGCATCGGATGGTGTCAAGTTTTCGGAATGATGTGTGGTGT  
GCTGGTACTGCGTCAATTTACTCTTTTGGCAAAAGAGTGGGAAGAGAAAGTTCCCCCAACCAAGAGGGAGCTTTTTTC  
AGAGTTTCTCGATGACCTTGGCTGACGATGGACGAAGTCAATGAGAACATCGAGGAAAATCCTCCTGTGTTTTGAGAG  
CTCTCAGTCTCAACCCGAAAGAAAGACCTCTGTTTGGTCAACTTTGTAGATATTTTATGAGAGAGTTTATCCATATTTT  
CTTTGACACCAAGCGCTCCAGACAACTCTGTGCTTCTTTGATAAATATTTTGTACACAAAATATTTATTTGCGCAAGA  
GATTCGAAGTGTCTCTGCGCTTTTCCGCTTTCAGCGCTCCTTCTCCTCCGGGAGCGTACAAGAGCTTCTCGTTCTCGTCT  
TTTTATTTTGGATTGTTGTTCTTTGACTGTGGTCAAAGGCTTTTGTACTTCTCGACAAAAGCCAGAGAGATTGAGT  
AACAGATTTTTTAAATGCGCTTGAACGGCTCTCTTGGTCTGTGTAGCTCTCTTCCGATGCTGTAGACTGTCCAGTTC  
GAATAGTCAGAGACCGTCTCTGACCACCTCACAGACGCAACGTTCTCCACACAATGACAAAATTTCTTTCGAAGGTATCC  
ATCACCAAAGTCTCTTTCTTCCCTAACACAACAGCTCCGCTTCCGGAATGGGATAACTCTCAGAGATGAAAGAGATGGTGG  
TCTTCAGCATATTTTAGCAAGTAAAAGTTATGCGCAAAAACGTCGCTACACTTCGATGTTATTTCAAACAGTTTATTTCT  
ATCCATATAATTTTTATTTAAAAATATGTTTCATTGCACTCTCTCAGAGTAGATATCCTCCCACTCTTCTTTTCTT  
TGCTATCTCGAGATGCACGAAAGGGCATAACTCTGTAAGTTTCTGACGCAAGACAGCGTGTGTCGATGTCGGATAAC  
TGTCCGTTTTCTCGGTTTTGTTTTCTTCCCAATAAATTTCTATATCGAGCACCCAAACAGAGACATTTTTTCTCTCCG  
TTCTCTGCAAAGTCAAAGGAAATGTCCTTCTTTTGTGATGTTGGAATCTCTTGGAGTTCCTCTTGACTTGTGTTGCTTGT  
CCTCGAAGACATTTGAGAAAATATCTATATTTTTCTCTTCTTTGTTATTTTTTTGAGAAAAGAAATGTTATCCCTCCA  
ACACAGAGGGAATTCGCTATCTTCTCAGGACGACTTCAAGAGATTGAGAGTCCGTTCCCAACCCGGAGACATGGAT  
ATCGCACTTCCAACAACAGAAACGTTCTTCTGATTCTGTGAGGTCGCGATATCCTCCGCTTCCAAAAGAAAGCGCC  
GTGATTTATGTTAGTAAAACAGCACAGTTTCAAGTCTATCTTTCTTCTCAGACACACCAACATTTTCGAAACAACGCTC  
GAAAATTTCTGTGAGTCTGGGTACAACCTCGCAACTCTCAAATTTCCGTTTTTCTCTTTGGGTATTTTGTCTCTCAA  
AAAAGCCGCTGGCGTGTGTCGAATAGAGCATAAAACATAAGGCTCTTCCGAATAGAACCAATCTGTCTCGCAACAC  
AGAAGAAACATTTCTCCCTTTTCTTTGACCATTCAAAGACAAAAGCCTCCATGTTTCTCTTGGAACGATAAAGAAAGCTT  
TGAAAGCCGACCAATTTCTCGAGTATGAAAAGTAATCTATCCCAAAAGACAGAGTGCCTTTGGCGGAAGCGCCAGAATC  
AGATTTCTTTGTTTTACCTTCCAATGCCAGAAATTTTCAATTAAGATTTTTACTAAATTTCTGTGAGAGTCCGCTCCGAG  
CACCACTTTGTGCTGTCTCAACTTCTCAGGACGCTCAAAGACGACAGAGTCCGCTCCCTCAATAAAGTGTGTTGTTG  
ATGTGCCAGAGAGACTCGAATTTTCTGTGATGCTGTGACGTAACCAATCGGCGCATCGAACGCAAAGTTGTATCCAGAA  
AGGTACGGTACGCTTCTGATGGTCCCAAGAAACCCCTTCTTTATCAGAGACTCTCCATAAATTTCCCGTTTATGTTT  
TCCGCTTGAGAACATCTGGTCCAATCCCTAGAATTTCTGGAGCGATGCGGACTTCCGATCAGAAACGCTTCCGTTCA  
CAGACTTTGTGCTGCTGTCTGTAGAGCTTCTCAAGTCTGCTTTTTGTTGACTGTTGCTGCGCAACAGAAAACAGG  
AACCTTTTGGCTTTGAGTTCTGCAACATTTTGTGGCTCATTGTATGGGACAGGGAAGGATTTTTTCCCAATCATCTGGAG  
AGTTTTTGTGAGTTCCTTGTCAATGCTTGGGAACGACCGCATGGCAAAAAGCTTGCATACATGCCATTTCCGAGATTAT  
ATGAAAGCAAACGACCTCCGAGACGTTCTTCTTTTCTATGAGAAGGATTTTCTGTTTGGGAAGAACGTTTCACTCCTC  
CAAGCAAAAAGACCCCGAAACGCTCTCCAGCGATAATAAAGTCGTACATTATCTTACAAAATATTTTTCTTTGACA  
AACAAAGAAAATGCAAGAAGAGACTTTTATCTTTGACGGGAAGAACGACGTCCTCTCTCGATGGGAGCATCACATACCTTG  
GAGTGGAGAGGTTGTTTTCTCGATGAACCTTGAAGATATCTTTGGAACGAACACTGGGCAAAATTTGAGGTGGAGGGAGGTG  
GGAAACAGAAAATTTATCGCTTTTCTCGACGAGAAAGAACACACATGAGGGTGACATCGAAAATCCTCTTTCTATTCCG  
AATTTTCTCAAATGGCGCACCTCTCCCAAGAAATTTAAAATGGACGATGTCAGAGTTTGAAGAGACAGTTGGCGATG  
AGCTGATTAGAATCACGTTTCTTGTAGAGATTGCCATTAAGCAACCAATGAACCTTCTCTCTTCTATTCTCAA  
TCGGACATTCGCTTCTGCGCTGTGTGATGGCAGCTTTCTCAAGGGAAACAAATTTGTACGGATGTGAGTGGCGGGA  
GCTCTAATTTCTGCTTTTGTATGTCCTTTGTGCTGCAATCTGTCATGCAAAAATTTATCGAAATCAACAGGGCGATGAA  
TAACAAGAGCAAGACTCTTGAACAGACCATAATGAGGCCAGAAAATCATGCTTGGGGGAGCGGTTAACGATATTTTA  
TTCAAAGATAAAAATATGGAAGGAGAGACTTTTCGAGTACGACGGAAAAACACGTTCTCTTTCGAGACGAGGAGTCTAT  
GTCGCTTGGGAAAATTTGTTGCTTCAAGGCTGAGGCGCTTTGGGAAGACCATCTCAAATAATTTGAGATGGAGGGA  
ATACGTTTCCGGGAAATTTTATGCTTTTGTCAAGGAAAACGATGACTACATCACAGGAAAATTTGGACGACTACGAGACGG  
TGTTTGTAAATATCTTTCTGTAGAGAGGCTTTCTCCTCTCCGAAAGTTCTCTTTTGGGAAAACAAAAGATCGCGCGA  
ATGGCAGCTGACAGATTGGCGATTGGGCTACAGAAATTTCAAGATTTTCTCATATTTTCTAGATAAAAATATAAGAGAAG  
AAATAAAAATGTCGTTGTTGTTTTCTTGGCTGCGAAGAGGCTTTTGTGGTCAAATTTAACGGACCTCTCGATGAG  
CTGAAAAGAGACTCGGAGAACGAGAAATTTCTCTTGGCGCTCAAACAAAACATAAGGATGCGGACAAAGTCTCTT  
GAGAGTTTTTCGAGGCTTTTTATGAGAGCAATTTACAGAGAAATTTCAAGATTTGAAATTTCTGGAGAAAAGCGATGATGAC

TGTCACAAGATTTCTCGATGCGACAAGCGGAACAAGAGAGGCATTTACATCAAAGCCGCAATGGAAGCGATAGACAAA  
GACATCCAAAGGCTCGAAGAAAAACAGAAAGAACTCCGTCAAAGAAAGAGGGCTCTCAAGGAAGAACTCGAGAGCCTTCC  
ATGCCAGAAAAATCTTTGTAACATTTTCATATTTTAGATAAATATGAAGCGACAGGCAGAAAGACTTTGCACAGCGAGTG  
AGGGAAAACTTTTCAATCATTGGGACATCTTTGTGAGAAAACTCTCAAAGACGAATATTACGTACAGACCTTTCCGG  
TTGCGCGTTTCAACTTTTCTGTAAGGAAAGGAGAATGGAAACATCGATGCTTTCGTCTCTGCTATCGAATCTCAGATTT  
TCTACAAGACATTTTAAAGCTTGGAAACAAAGGCTCGGAGTTCCAAAGGATAAAAAGAGTTTCTTTGTCTGAACTCGCCGGT  
TTTGTGGAGTAAGATGCAAGCGTTCTCTCCGAGAGAATTTCTTAGTTTCTCGTTGAACGGAGAGAGTTGGGAAAAGT  
TTGTGACGCTGTTCTCGTGTGGTAAATACAGAAACGGAAGGGCTTCTTTCTCCAGACGGCACAATTCATGGCATA  
TTTACACAGAAAAACAGAGAAACATTTGTGAAACATCTGTAACCTCCGTAAGTTTGGCGCGTTTGTGGGAGACAGAGAGAA  
AGAGAAAGGGAAATCTTTGAGAGAGAAGAGAGATCGGAGGAGGATTTCTGAAAAGTTTGGAAAGAGAGGGGACAATG  
AAAGGTTCTCGTTTCGTATAAAAAGATGGATGGAAACCTCCAAAAATCCAAAGTTTCTGGAGTTCGGAACTCCTCAA  
ACTCTGACCAAATTCGTGAATGGCAAAGAGCAGCGCAAAGCTTTCTCTGGCACGAATCAGGAGCTTTTCAAAAATCAC  
AGAGATTTTGAAGGACAGCCTCATGGAAATCTCTTTCTTTGATGAAGCGGAAACGTTATCTCTTCTGGCTTCTACA  
GCCTTGGAAAAAGAGAGGGTGTGGATAACCTCTCTGCTGTAAGGAAAGAAAAAGCAAGTGTGGAAAGAGAGAAAACTC  
GTTTGTCCACACCTGTCTGGAAATAAATATTTTCTTTGATAAATAATATATGTGTCTCTTTTCTCGTATGTA  
ACGATGTCCAAACAACCTTCCAAAAACGGTCAAGTTGTGTCCCACTATTCGAACTTCCGCGGTGCAAAACAA  
AGGGATTTTATTTCTGTTGGTGGAAATCTCTACATCTCCGATGGGCTTTCTTGGCAGGTGGCTTCGCATCCGGGAG  
AGCTTTTGGATTATGAAGACTGGACGAGCTTCCAGCTTTCCGGACCTGTGCAAAATGGACAGCTTTGACCCGTGAGG  
ATGGACGCGACAGTCAAAACACAACAGGAAACTAACACTGAACGAGACTCCTCAGTCTTTACGCTGGCTCCCATTC  
GAGCACCTCTCGCACATACGTATCTCTGCTATCGCAACGGACCGGACCTCATTCTGCTCAAGCGGAGCGGGAGCGAGC  
CAACTGCCAGAGGAGCTATTCGCTCCGACGACGGAAGTGAAGTGTCTTCCGAAACGAGCATCGCCGTTTCTCAGTAT  
CTCCCATCGGTTCTACCTTTGTTCCCGTGTGGCTGTGAAATCACAGATTACAAGACAGACATCAGAACAGGCGCTGG  
CTCGTTTGTCTGTTTGGACGAAAGAGAGCTACATTTGTGTATGACGCTTCTCTGTGGAAGGAGAAATCTTTGTTGTGGAG  
AACGTTTACATTTGGGACCGGATTTTGGCGGAAGCAAGCAGCAGAGTACGACGCTACACAACACTCCACCCCTTG  
TGCAAAACGAGAGGAAACAGAGACCTTCCAAACCTGTGACATGCTCCAGCAGTTCGCAAAAGTTGCCATTTGTACAA  
CCGAAAGCAGAGGATACATCCGCTTCTTGTAGAGGAGAGGAAAACTTCGCTGCAAGATCGGAATTCCTCCACAT  
ACGGGAGAGTCTCGATGAGGAGGAGCGGCGAGCCGCTCGTCCAGGCAATTTCCGCTGGGTTTGGAAATCTTACT  
TTGATGGATGCTTCACTCCTCTCGAGCTCCCGAAGCAGACGCGAGGAAATGTGCGTCTCAACCAGCAACTCCACC  
ATTCAACTACTACAACACCACCAATACGACGCAAGGGGAGATTTTGTCTCCAAACTTTCCGCTCCAGCATTTGACCG  
ATTGTTATGCGACCCAGCCGACAAGGAATTTCCATGTCCCTTTTGCCTTTGAGCATCTACACAACAAGTGTGACA  
CAATAAAAAATATTTCAAGAAATATTTTATATCAACCGACTTTTCAAGAGAAAAAGTTATGTTTAGTGAGATGGAG  
AGACCGAGACCGGAGAGATTTCTTCCGAAAAAGGAAGGATGCAAAAAACAAGCTTATTTGGAGCTTCTGGAAGAAATC  
TTCTTTGGCGTTTGTGCGGTGTCCTCGAGGAAGAAAGAGAGTGTCTTTGAAAAGTCCCAAAAAAGAAAGGA  
AAGAGAAGCTCGAGGAAACCTTTCATCTCACAGAAAGACAGTGAAGAGGGCAGCAAGAAAAACAAGGTAGAGGAAAT  
CTCGCTTGTTCGTATGAGAATGATGAAGAGTTCCTCTCAGGAGGGTGCCTCAACGTTTCCAAACTTTCCGCA  
CCAGAAATCGAGAGACCGGCTTGTGATGATGCTCCTTTCCGCGATGCTCTTTGGCCCTGTTGAGCATGTGCACCCAGAA  
TTCCCCAGCAAAAAACATAGAGAATTTTACCAGGGGTGCAAGTCTTCTCGGAAGAAAGTAGACAAAGAAAGAACCCG  
ACAGCTCTGTTTACGAGAACAGAGAGAGGCTTTTTCTGATGAGGTCGCGCATCGGCACAAGTACAAAGGAAACAGGGAA  
GAACAAGAAATTTTAACTTTTCTTGGACGAAAGTAAACAAGTGTCTGGAGGAGCCGAAACGCGAATCTTGTCTCATGG  
AAACATATTGCAACTTTTTCGAGAGACTCGCAGCAGAAACAGAGGATTTCAAGGAATCTGTCAATTTGCAAGATAGTGGT  
GTGAACCTGATGTTTGTGGTTAGCAGCGCCACGACATCAAAATCACAAACTCTCGAGGAAGCTTACCTCGATCCGAGTGT  
TCCTTTCCGGCCACGAAAGGGTCTTTACAGATGCTTGGCTCAGAGACACCCCGGAAGAATATCCTTGGAGGAGCACA  
AAACTCTCGAATTTTAACTTTTCTGATGAAAAAGTAAACAAGTGTCTGGAGGAGCCGAAACGCGAATCTTGTCTCATGG  
CTGTGACGCTGAGAGACAAGAAATCTCTACGGCGACCTTTGAGAAAAAGTTGAGCCTCGTTGTCTCCCTTAAAAATTCG  
GCGTTTGGGTAGTTCTTTTATCCATGTTCTTGTCTCTTTTATAGGCACTGAACGCCAGCGATCCCAAGTTTTCGCG  
GAAGGATGTCTCAGACTCGAGGATAGAGAAAAACGCTGCGAGTGCACAAGAGGCTATTTGTTTTTCCGTTGTAAC  
TTTGTGGAAGATTTTCAAGGCTTCAAGGCAAGGAGGAGGCTTCTTCTGTTGTTGCTGTTGAGCCAGAAATCTGAGAA  
TCTGCGTGTCTTTTCTGCTCTTCTCTTCCCTCCACTGACAAAACTCTCCGAGGCTGTAGCGCGGATTTGAAATTT  
TGCGATATACCTTTAGGAAACGAAATTTCTTCTTGTTCGTTTGGAAATTTCTGCGGATGGCGGATTCACCCATAAAT  
TGAAACCACACGAGAAGCCGCTTTCCGGAACGCTGACTCCCTGGCAAAGCCCTCATGAAGAGATAACAAAAACTCT  
GAAGGACTTTTCTCGAAGACTTGAAGTCTACTGCTTCTGGAATAAGACGGGCGCTTGGAGACTTTAACACAAGGG  
AGTCAACAAGAAATTTTTTCGATGAATGTAAAAAATATTTTAGAAATATCTCGAACGCTCGAGAAGTCTCAAAGG  
AACGAGCACTTCCGATGTGCTTTGGGTGACCCCTTGCATTTGGTCTTTGGTCTGTTTACTGTACAACATTTCTGTGATAC  
AATACGCTTGAATAATGTCAGAAATCCAGATTGTCTGAACATGAAAGAAGCGGGCAGCTTCCGAAAAACACCTGTCCA  
GAGACAGCGACAGAGCGGCAACTGCGTTTCTACATCTCCCTTTGTTTACCCACAAGATGGCCGAGTGAAGGACC  
TGCTCCCTGAATGCTCGACCAAGCATCGCTCGAAATACTTGTGCTGAATCGGGAACGCTTTGGATGACCGTCTGCG  
GGTAGTAGTAGATTGTCTGCAAGGAACCAAGTGTATGAAATTTGGTCTGTAGCCCCACGGTCTCCAACCTCCAGGT  
CTCCAGCTGGGGGAAACCTTCTCTCGGACGAAAAAGAACTTCTCTTCTCATTACAAGTTTTTTGTCTTGAAAAAA  
TTTTATATCATGGTCAAGAGCGGCACTGAAACAACCTCCTTCCATGGAAGGCTTATTCGCGAGCAGGGAGAAAAAT  
TCCTTGGAGCGACGAGGAGGTCGAACTCGAGCTTACAGAAAGCGGATATGTGCCGTCCGCTGTTTCAAAAAAT  
TATACAAGGGGAGAAACAAGTGAACGAACTGAACTGAGCAATGTTAAACAGAGAGCTTCTGCCATCTCGTCTTAATA  
TCACAATTCGATGGACTGCGAAAAACAGTTGGTTGTACCAACAACAGCTCTGAACTTCCGAGCTTTGGTTTGTCCCT  
ATAAGAGAGCGGTATCAGTCCCGGTAGTAAACGTCAGTTCTTGGAGGGTCTGTGCTCGTATTACAACACTCTCGAAAA  
GAAATACAGAGTTTCAAAGCTTAAAGGAAAGGATGTCAAACAGAAAGGACGCCGAGAAAAAGCAAAAGAAAGGAGG  
GATTTGTGACGACTTTGCCACGGAAGGCTGTTCTCGCGAAATCTGATGTCGAGATTTCTCCCTTAATACCGTCTTCTG  
GACTTTCAAAACAGGCGAGCCCAACCGGATACCCATCGGAACAATGTCTCTTCTGCTGTGCGAGGCGTCAACACGGT  
CCGGGAATCTGCTACGCTCTCAAACAACAAAAACCTCGGATTCGAAAGGGGAGTTATTTTCTGTGTGGAAGGAA  
AGAAAACTCTTTTCCGGGACCGTGCAGGAAAAAGACTCGCAGAGGAGATAAAAAATCCCTGTTTGGGTTTTCTGCCC  
CTGACGAACTCTGTGGAAGGAGAACTTAACTGCTGTTGGAGCATCATCTTTTGTCACTTTGAAAAAGGGGATGCAAC  
GTTTGCATCGGCGTGTCTTGGAGATGGAATGATTGAGGCTCGAGGAACGTTTTCTCGGTTTTCTTCAAGAGCGAA  
AAAGCAAGACATCTCTGCAAGTGTCTCATCGGTTACACGCGCTCGGAGAGAAGAGCAATGAACCTTCTGTGTCTGACC







ACTCGCAGCAGAACGAAACACTGGTTTGTATGTTTGTCTGCTGGAATCCATCGCTTTGATGATGAAACGAGGGAAACGCAA  
CTTTGCGATCGTACTCGCAAAGTTCTTCTTTGCTCAAATGGTGACGACAGCCCATTTCTTTGCTCTTCGACGGATGAA  
GAAGACAAAAGCAAAGAAAGCGAGATTGCCGAGATAGAGTCTCTCTGTGATGTGATTGTACGTTGCTGTGGTTGGATA  
GTTTCATTATAAAGTTTAAAAATAAACTTTATTCGAGCTGCTTTGCGTCGGCAGAGAACACGATTTGTCTTTGTTTCC  
AAAGAGTAGACAGTGTACCTTTGAACACTCCCTCTTCCGAATAGAGCTCAACTTCCGAAAGCCAGCCGGTGGGTTACCA  
TTTTTTGTGTTCACCGACTTTTTTCTTCCCTTCAGCCTCACCTCAGTTCTCTTTGTTTTTGGGCACCACCACGTCGTCT  
CGAGACCATGCTTCTCCTCGTTCAAAAACAGGTTCTCTTTCCAGTCTCTCCTGTCCCATATATCACAAAGTCTTCC  
AATAGATTGTTTTTGTCAAAAAGAAGTGTCTTTCGCGTTTTCGCTAGAAATTTATGCCAAAGAGCAATAACAGCAAATTC  
TTGGTAGTCAGAGAACCTTTCAGGCACCTTTGCGAGTCTCCAGACACAAAGAGGGCAACGCTCGAAACGTAAGTCTCGA  
GTTCTGCGATTCCAGAGCAAGTCGAAACTTTCAGCGTGCAGAGAAGCTTTAGAGACGCCATAGTAAAGAAAAAGTTGAA  
AAGTTCCTCAAAGAGTAACAGTTCCTCAATGTTTCGCATTTTCAGACCTTGACTTTTCTCGTGAAAAAGTTGTGACTTTT  
GTGGAAAAAGGTTCTCTTTGTTTGGAAATTTCCAGAGAAGAAACAAAGGTTGTTTTACAACGCTGTGTGCGGCTGTCTC  
AAGAAGAAGGAGAGGGAGATTGGCAAAAAGATAGAAATCCGCATCGCATAAAATAATTTTCTCAAATAATTTTTCTCC  
TTGGTCTCACACCGAAATGTTCTCGCTCGCGAAGTTTGCAAAACGAAAGGTTTTCGCTTCCCTTCAAATAGAGAAGCC  
ACTCTTGGAGTTTCCCGTCTCGGAATAAACCTCTGTTTCTGTGGTGCGCCAGCAGAAAGTCCACCTTGATGTTGACCC  
ACTTTTTGCGTTTTTCCACCGCCTTCGTATATTTGCCCCTGTATCACAGAAGACACCACGTTATCGTCTCGTTGCC  
ATTTCTTTTCGCGTTTTTTCACCACTCTGTTTTTATTCGCTGCTCGTGGAAACGAAACGACCTCTGCTTTCCCG  
TTCTGTTGACAAAGAAAGCGTCAATTCGCAAGAGAGAAATTTATAACCGAGCGCCCGGTTGCAAAGTCAGCATAAGAC  
GTGTATCTAAAGGGGAAATGACACTGTCTCCAGAGACAAAGTTTTGATGCTCTCAACATACTCGTCGAGTTTACGAAAT  
CCCCGAAACTCTTCGACTTGAGAGAACAAAAAGCTTCAAAGACTCCATGTAAAAAGAAAAATTTCCGATCGCTCTCTG  
AATTCGGCGTTTTTGGAAATTTCTTGAACCCCATGGAAACGCGAACTCATAAAATATTTTCTCATAAAAAATTTTTTA  
TCTATCGAGCGCAAGAATTTCCAAAGATGGAAACGCTGTAGAAGCACACAGCGTGGGAAATTTATGGATGTTTCCAG  
CCATCTGTTTCAAAAACAATTTGCGCACCAATAGAGCAACTTGCAGCAACTCTCTCTCGTAGATGGAAGGACCA  
AACCACAAAGAAAGATATGCTCCCAATTCATCTCCAGCGTTGAAGCTAAACAGCGAAAGGTTCCAGAAAGATGTGT  
CGGTCCCCTCTCGTCATGTATCAGTTCCGACCATATTTATGCTTTGAAAGTGCCTGATAAATCCTTCTCCACTCG  
GAAGACTGCTCCTCGGAACAGAGCGGACAGAGAAACACAGCCACAGAAAGACAAACCATTGCGCACGAGAAAAT  
GCCCTTTGGCGAAGTGTGGGGGATTTGAGCCATCTGTAAAAATTTCAAAGCGAGCGGCTGAGCAACAAGACCAAAACGC  
AGCTACGAAAGAGCAAGTTCATTTGTGCTCCACAGTCTTCAAAAAGTGTGTGTTTTGAAGCATTCCATCA  
AGCTGTAGAGCGCAAAGATATCCACATCGGACTCTCTTCTTTTGGTGGCGTTGCCATCGTGTACCAGAGACAGCC  
AAAAAAAAGAGAGAGCGGAGTGTGACATTTATTTTGTCTCAAAAATAAAAAAGAAAGTCTCGATATGCCTCAGA  
TGACATACATCAGCAAAGGAAGAAATCCCGGAGAGAGCATAACCGGCATATCGGAAATCTTGAGAGGAATCTTCTGCTCCA  
AGAAGAGCATCCAACACAAAGAAAAACAACCTTTGTGACGCCCTCTCTCGAAAAAAGCAGGAAAAACCAAAAAGAGGAA  
AAAGCACCCCAATTCAGTGTGAAACCGTCAAGCGAAATCCAAACGACAGAAAGCTCTTGGTTACCAATGTAATTT  
CTTCTTTTCTCTTCCAGGATGTGAAAAGTTGCCCTTTTGCCTAAAGAGGGAAACGTAAGAAAGAAAGCCAAAACAG  
AGAGACATCCAAGTAGACGCTTCAAGCCTTTATAATTTCTGTCTGCCTCAAGCGGAGAGATTATGACAAAAGGCCA  
AGAAAAGACAGAAAATAGCCCAAAACAGACGTTTCTCGCCAAAAGTGCCTTCCGTAATCTTTGTTGATGCTCA  
GAAAACTCGCAGAGCGAGGAGGTAGACATTTTCCCTTTCTTTTGTTCCTATAAAACAAAAACAGGAATGCCAACA  
CAGTAGCCAAAAACAGAAAGATGAACAGAAATCTCGAGGTTTGCCTTGTGTTCGAGGTAAAAACATCTCTTGCT  
AGAATTTCTGCTTCTCTTTAGGAGCTGTGCAAGTTTCGGAAAGTTTCTGCTTCCGATGCGCAGAGATCAAA  
GAGCGATGTGCGATGGACGATTGAGCGCAACAGAACTGTTCTCTCAATCTTGGAAACGTTTCAAAAAGCTTCTTGA  
GAAGTTTCCGGAACGTTTCCCTGTGCTGCTCTCGATAGCCGATATATAAATTTTCTTTAGAACTTCCCTCTTCTGC  
TCGAATTTATTCAGCTTGAACAACCAACAGAAACGACGACTGTTTTCATGGCTTCTTTTGCCTTTTCTCCGTTGTCAA  
AAATATCAGCCTCATCTTTCTTATCGAAAAATAGAGAAAGATTTCTGCTTTCAGTTTTCGCTTTCGAAAGAGATGTAT  
TATACCGACGGTTCTTGTTTGGGAAATCCAGGAAAGGGCGGCTACGGAGTCTCATATGTAAGATGAAGAAGTCTTCT  
GACATTTGCTGGGCACTTGGCGGAAACAAACAATAGAGCAGAAAGCAGAGGCTTGCATTTGTGGCTCTTTCATGGCTCT  
CAGAACCAACGGAAGTTGAAATTTTACTGATTCGCGATATGTCGGAAGGAATGACGGAATGGCTTGTGATGGAAG  
AAAAACGGCTGGAGAACCGCAACAAAAACCTGTTTTGAAACAAAGAAAGTGGCTTGAACCTCGACAGGCTCAACGCAAA  
GCATAAAGTCTCATGGCGTGGATTTCTCGCTTCTCCACAAATTAATAAACTTGGCGACGCTTGGCAACCGGGCAG  
CAAGGGGTAATAAATAATTTATCAAATAATTTAGAAAAATCTTCTGTTCTCTGCTTCTTGGAAATTCGACGCGCAC  
CTCAAATTTCTGTGAGCATCTCAGATGCCCTTGAATCTGTTTCGCGTGGGAAACGTAAGTCAAGATTCGGTT  
TCTTTTGTAGATACTCGACAGTTTGAACCTTTTTTATCATCGTCCATTTCTCAAAGAAAAAGAAATCCTTCCGGAGAAAT  
TTTGTAGTTTCTTTATGATGGAGGCGTTCCCAATGAAACCTTTTTTACATTTCTACTTTTGTGGTTCCCAAGAGCT  
CAAAAATTTCGAAAGAACTTGTGCTTCAAACAGAGACGTTGTGAGATGTGGTTCTTTCTGGTCCCTTTATGCCAGAGAAA  
GAAAGCATCCAAGAAACAGAAAAACATCTCGCAAAAAGAGTGGTCTCTCGGATGGAAACGCAAGTGTCTGTCAATGTC  
AAAAATCTGATGGGAGAGCCATTTTGGATATCTTTCATCGTCTACGCGGCTTCTGTGTGAGAGGATCTGCGAGATG  
TCTCATCGATGCGATCTCGAGATTGACGCGATTGCTCCCAACATCTCTGCTGTACGCTGGAGGGAATCTTTCGGACA  
AGAACATGCCAGTCAAGGTAAGAAATTCATCAGAAAGTTCAGGCTTTCGCGAAGCAGAAAGTCAAACCCATCGGTATT  
TCTTTCTGCTCATCTGAAAGAACGAAATATTTTATTAAGATAAAAATTTTGGAGCAAGATGCAAAAAATTTATCGCGTG  
CTATCACGGAGGTTGTTCCGACGGAACCTCTGCGCATGGGTTCTTCAAAGAGATATCCAAACGAGAGTTTACGGAA  
TTCCGCCATCAGAGACGGATTTTCTTGTATCGACTTTGAGGAGCGATTGTTTTCTTTCTGGATGTTTCTCCGCAAAAT  
TTTGTAGAAATCTTCCAAAGGCGAGACGTTTCTTATGACCACCACGCAACGACCAAAAACTTGTGAAATCTGT  
TGGAAACGAAAGAGATTGCTGTGTAATTTGATACGAAAAAGTGGCTGTCTATAAATTTGGGATGAACTTTTTCCAG  
GAGAGGAAAGACTTGGTTTCTCGAATACGTCGACGATAGAGACAGATGGCAATGGAAGCTTCAAACCTCGAGAGAAATA  
AACGAGGCCATCTACTCTCAGGTTGGATGGAGAGGCTCGAGGAACTTTGGAACACAGAGAAAGATTGCTCATCGCATC  
TGGAGAGAAACTTCTGCAATAAAAAGAAAGACACATCAACGATGCCATCCGCTTTCGCTTCCAGTGAATTTTTCGGAT  
ACGAAATATGGCTCTGCCAAGCCAAATGGCAGCTTCTGTTTCAAGAGTGGAAACAGACTCTGTCTGTGCTTTCGCAAT  
GGCAAAATTCGCTTTTTTCTGCCATTTTGAAGCACGATGAGGAAATGAGGAAATATGGGCGAGCTTTCAGGAGAAAA  
AAACTCTCTTGTCTTTCGACTCTTTGTGAAAAATTCGGGGGAGGGGTTCAACCCGAAAGCGGGGTTTACCATTTCGAGT  
CCGAGAGGATTCGAGAAAAATTCGAAATAATTTGGACAATAATTTTACTGAAGAACTTTGTGAAATGTTTTGATATC  
TTTGAATGTCTTGAACAAGTTCTCGACGAAACGCTCGATATTTGGATGGACGATTTCGACGAAAGAAATTTCTGATAA  
AAGGAAACGGGCCAAAATCTCGAAGGTTTGCATCTCTGGCTCTGTTTCGAGGAAAGACGTTGGCAAGGAGAAAA

GAAAGTATGAAAAAGCGCATGGAGTTTTTAGGACGACTCCAAAAAGCTCGCAAACTCTGCGAGAGCAGAGAAAAGGGA  
TTTTCTGACGTTCAACGAAACCACGCGCTTGTGTAGGTTACGACCCAGAGGAAAAGAAAGACGAAAAAGAGGATGAAGAG  
GTACAGAGAATTGTCTGAGAAAAAGAGGAACTTTTGGAGACCTTTCTTCTTACGCTCCAGCAATCGTCCCCTTTTT  
GGGATGTAAAGACAACTCTGGTTACATACGATAAAAAGCTGTACGGGGATGGAAAAGAAAAATACATCACAGTGAAG  
AGGGGAAGCCGAGTCTGACCCACTCGAAAGGACCGCTGAAGGTGAAATTTTGGGACGGAGAGATTTCTCAATCTGGGG  
ACTCTGCGATGTCATCGACAAGATTTTTGTAGATATTTTTGTGTAATAAATATCAAACCAAGTCTCCTTGTACTTTTGC  
TCTCGACGAAGACCATCGAAAACACTTCTGTTTTGATGTGCAGCGACAGTAAAAGCCATACACTATAATTTATTTCAA  
CAAAAATAAATATCTCTGAAAGAGCCATAACACTATAAATGCATCGCTTCTCGGGAAAAGGAACTCGTCTCTTTTT  
TGTGTCGAGTTCAGCAAGCTCCCAAGAAAGGAAAGATTTATGTCACAGTGAACAAGAATGAACGTGGAGCTCAG  
AACGAGCCACGTTCTCTGACGGCTCCATCCATTTTTAGAAAATAAATATGGGACAACTGTGGTGAATTTATAAAAA  
ACATGGCAAGAAATTTCACTCTGAGGACAACAAGAATTCAAGGCGGGAGTCCCCCATGAAAAATACAAAGTTTTTCAG  
ACGGATAAAAAAGGGAAGGAAACTTCAGGTCGAGGGAACGTTCCGAAAAGGGAAGGCTCACGGCAACTTTTTTCATCCG  
CGGAGTGAAAAACGCCATTTGAGCAGACACATGCACTTTTTGTCAAAGGGCGAGTTTTTGGAAATTTTCAGAGGTCGAAGGAGGC  
ATGCTATAATCTCCAGAAACAAAAGAGCGGAACATTGCACTACTTTGAGAAAGATGGGGAACTTTGTCTCCCTTTGAAG  
GTCTCTCGTTACCTCTTTTTCTGAATTCAAAAGAGAATGGCCCTCCTACTCCCATCTTTTATTCGACACAATTTCAAAAA  
ATTTAAAACGTACGAGTACCGCACACAGCTCGTCTTTCCCTCCTTTGTCGATACACAAGAAACCAAGTTCAGCAACATAC  
CCGGACACGCAACTCAAACCCAAACGAGGTGCGCGCTCAAATTTTGTGTTGGTGGGATGCCATACAAGGAAAGC  
TTGCGTGAAGAAGACATCCAACAAATCCCCAACGATACTTTTTGTTTAAAGTTTTGAAACAAAAACATGCACAAGTTTC  
TGAAAGGAGAGAGGTCATCTTTTTCTCTGAAATGGGAGCTTTTGCCCAAGGAAACAAAACCTTTGAAACCCAAACGAG  
AACCATCACAAAAGAGAGAAAATACAAAGAAAGCAGACTTCAGGAAAGTTTTCTCTTTTTGTGACTTTAGCAGAGCAAG  
AGACGAAACGAGTGGAGGGCAAAATCCGTAACGGAAAGCTTCACGGGAGGTGGACACTTTTACGATAAGGGGAGGGTGCAG  
AGTTTTTACGTTTTGTGAAGGAAAACATCGAAATGGACCCAGCCATCCGAGAAAACGCAACGCGTGAATTTCCCAACGCA  
AAAGAAAGGAGAGCTTTTCTTTGACAAAAGAAAAGAGAGATAACATTTTCAAGTCCACTTTTTTGAATGATGGGAAAAC  
GCGAGATACATCCAGCTTGGGTGTGGCCGCTCCAGCAAGGACCTACAAAACACTACAAATGCTTTCAGAGGACATTTTTCT  
CCATCTCTAAAGAAAACAAATTTGGTGCAAAATTTCAAAGAGAGAGGATTTTGGAAAGGTCGTCTCAAACCTGCGAGCCCTG  
TCTGTACATCGAATGTCCTCAGTCCGAACTGCCTACGAAGAGATGGGATATCCGATAATCGTCAGCGCTTTTCAGACCCG  
GAGAAATAGATATTTTTCTTTGACAAAAGAAAAGAAAAGATGCAAAAAGTTTTTTGAGAAGAGAGAAATGGTGTGATTTG  
CCTCGTGGACACGAGCCTTCCCTCTCCGAAAAGGAAAGATTTTCATGACCAAAAAATCACAAAGAAAGGATTTTCGAGAGG  
TCAGAGGCGTTCTTCCAAACGAGAAAACGTTCTACTACATGCGCAAAATTCAGTGGGGGAGTTCCCTTTACGCAACATAC  
ATCGACGGGAAGATGGAAGGGCTCTTTCGCGTTCTTCTCGACAAAGAACTTTTGGTGGAGGGACAATTCAAAGAAAGGAA  
CCCGCATGGAGTGTTTTATGAATGGTGGGAACTCTGTGGCATCCGTTTCCACTTTTGTGGATGGAAAAGATCTTGAAT  
GGGCTTGTGACGATGAGGTCTATGTCATTTCAAGGAACGAAAACAAAGGAACTTGTTCGCTCTTGGAAAACAAGATCG  
GAGAACGGAGGTCTCTTATAGTTTTTCAATGGCTTTTTCTGGAAAAGAACGCGGAGAGCCAAAACATAGAAAATATCGGCTC  
TTCTCTCCACATCGCTCTCCAGAGAAAAGTTTTCCGCAATGTTTCAAGATGTTTTCAGAGATAGAGTTTTTTTTCAGATGAAAG  
AGGGACGAAAAGTCTTCCGCAAGTGGCACAGTTTTGACCAAAATTTCTTTTTGGGTAGGAAGACCCACAACCTTACGAGGAG  
AGATGTCATAATTTCTTTTGTAAAGAAAATTCACATAGTCCGAGTCTGTGTCGAGTTCTTCGTCTCTTACGCGCTTGA  
GAGGCTTTCTCATTCTCTGGGGCGCCGATAATGCAAGCTCTTTCGTCAGGTTCCGCGATCGTCACTGAAAACGCCACTG  
AACACAAATCCATCCTCTTCTCTCGATGTCTTCTCTCGAATCTGTCTTTATTTTGAATCTTTTGAAGAAACCTTTC  
CGAATCGCGTTCTTCTCAACGAAGAACAAAAGAAAGTTTTCTCTCATCAAGAAATTCGCGAAGACAAAAGAGCATCGTCA  
AAAACTCTCTTCTGTTTTTCGAACACACATCAACGCTTGTCTGAGAGCAGGAAATCTCCGTCGAGAGAGTTCCGCTGCT  
CCTTTTCATCGCCTCTTCTGCTTTGGCAAAAACAAGAGTTCGCAAGAGATCTTGATCGCCAAACGGACTTTCTCAAATGGAC  
GCTTCCAGGAGTGGCTATGCCCTTGTGATGACACAGGAGACGAAAAGTGGCAGAACACACAATCGCATCTTGGTTTTTTTT  
GTTTCGCTGACGACGTCAAAAGTACAAAACCTCCCTTGTGGGCTGTTGCGAGAAAGAGGGCTGTTTCGTTTTGCATCATTTT  
TGCGGAGTGAAGAGATTCTTTTTGTCTCCCAAAGAGTCCGTTGAAACTTCGAAATGCAAGTTTTTCGAAAAGAG  
GGAAATGGTCTTTTTCTGTCTCTGAAGGAAACCAAAAATCCAGAAAAGAAAACATGAAAAACCCAAAGTGTCC  
TAGACACTTTGAAAAAATCAAAAACTGTCCTTCCAGATGAGCTCCGTTCCATCTTTTTGGTTGAGACGATTTTGG  
GATACAGACGGCCTTTCCACCGCATCAACACGAAAAGTACCAACACAAGAACAACGAGAAAGCAGGAAAATGTGTTCT  
TTCTGATGTTTTGGGCAAGGAAAAGAAAAGAAATTCGCGTAGAGGGCAACTACAGGAATGGCAAACTCACGAAAATTC  
CAAGATATGTTGGTGCATTTGTCGAAGAACTGTGAAATTTCAAATGGTAGACTCGTTGAGTGTTCGTTATTTCTTCAA  
CCCAAAGGCAGACTTTGTCAAACAATAATGTTGAGGAAAAGAACCGCACAGAACACACCATCAAAAAATAGAGATGAG  
GGATGGCTCTTTGTGCATCGAAGAACAATAATGCCCTTTGGAAGGAGTCCAGAGAAAGGTTGAGATTTCTTTCTCCTG  
AAGGCAAGTAGAAGAACTAGACGAAGAGACAGAATTTGACAGAATCGGGGAGAGGAACTCTCATCTCCGATGTTGGGT  
ACAGAAATAAATAATTTATTTGATAGAAATAAATGTACAATTTTTTCGGAAGGAGAGAACTTTATCTTTCTGTGTCTCTG  
AAAAAAACCATAAACTTTTAAAAAAGGAGGACTTTGTTTTGAAAACAAGGATTTGTTTCCGATGATGCAGAGCGGGAGAGT  
GAAAGACTCCCAAACGAGAGCTTTTCCGTCCTCAAAGGCTCCATTTCCGACAAAGGGACACACATAGACGACTCTACCAT  
ATTCACAGAGTATGAGTACAAGAGAGGTGCTCTTTCAGGAAAATATCGCGCAAAAGAAAGAGATCAGAGACAGAATTTGTG  
AAGTGAAGGAGAGTTTTCAAAAAGGGAAGCCTCACGGAACCTTTGTTTTCTACGAAGGGAAAAAAGTTCTCAGAGAGTTGT  
GTCTTTGTGGACGGAAGAGCTTTTCGAGTCTTCTCTAGACACACTCTCAAAGAAAACAACGATATTTTGCAGAAAACAAAA  
CAGAGAGGAAGAGTACCACATACAAGGACAAAAGAAATTTGGAATTTCTCCATACGTCATCCGCAATCGAAGAAAGAAAAG  
TAGTGGGTTTTGGACGTCGTCGAAACGAGAAAAGGAAATTTCTCAGAGACTGAGGAAGTCTGCGCAAAACGAGGAAAAGCA  
AACGCAAGCAGCAGGGGCTTTTCGAAAATTTCTTTTTCTCTCGTGGATACCCAGAGCAATAAAAAATTTATGAGAGCTTG  
GGTGTGATTTCTCGTATGCACAAGTTTTCTGAGAAGAAGGAGTTGGTCTCTTTTTCCGTTGCTGAAGGGAACCATAAAAAT  
TCCGAAAAGAAAAGACTTTGAAAATCTTGTGTTTTGTTCAAACAACGAAAACGGAACGGAAGGAAAAGTGGACAAGATTACCCA  
ACGACAGCCTGTCTTTCTTTGGAAGGAGTGAAGATTTTTCAGGGACTGCGGTTTTCTTGGACTATAGAACCAAGAG  
TACAAAAAAGGACTTTGCTCATGGCAAGTACAGAGTTTTTTGTTGTCAGAGAAGGAAGTGAAGGAAACTTTGTGCTACTGG  
CGAGTTTGAAGAGAGAGCCGTCGGGGACGTTTTGCGAGTTTGAAGCGGTTGAGACTTGAATAGAGTGCCTACGTC  
GAGGGAAGGTTTCAACGTCGATCGTATTCCAAGGATACGAAATGAGAGTCTGAGGAAACAAGAAAAAGGAGAGAG  
ATTTTTGTGAGACTAAACCCGTATGGAAGGGGATTTGAGAGGCATCAAAGAGGCGTCTTTTCAAAAAGAGCAGT  
CCGCATAAGGTTCTTTGGCGAGGAAAAACAGCAGATGTCACGAGAGAAATGGGAGGTTGTGACATGTTGTCTGTCCGAG  
ACGAAGTTTTCTTTCTTGATAATTTTTACGAAGTAAAATTTCCAAAATGTCTTTGAGTTCTGTGGCAAACTCTGTCCAG

TCGTCGATGTTATCCCCCATTCTTCTTGCAGTAAAAAGTCGCTCCTTTGTATGAAATGGTAACCCCTTCGCATTTGCA  
CGCTTCGATGGTCAAGTCTTTGAAAAGTTTCATATCCCGGATTTTTGTCCAGAAAAGTTGAACTTGGTTGAGTGCCT  
CGTATGTGCTCTTTATTTTACTTTGCCAGAGAAAGAGCGTTTTGAAAAGTCAGGGAAAATTCGACGACGAGGGTTTTT  
TTGTGGCTGACTTGATCATAATAATTTTATGTAATAATATPCTAAGCTTGTATCTGATGTTTTGCGAGAAGTTCCTTG  
AGCCTTGAAGCTCTTCGAGCTGCTTCGCTTGTCTTTTTGTCTCTTGGCGAATCTCTGCCCTCTTTTTAGGGCCTG  
TCTTTGTTCCGCTGTACCTTCTCGCATGTTCTCTCGACTTTTCCCTGTTCTTTCTCTAAATTTCTGGAAATAAT  
CCTTCTGAGTCTTCTTTCGGCAACAGAACCCATTTCACTGTTACAATGGACGTTATGATTTAAAAATTTCTATTTCAAAA  
TAGTTTTGGAAGACATTTAACCAACGAGCCTTTGGAAGTAAATGAGCTCGACCAAAGTTTCGCAAACTTCCAAAGACTATT  
GTCTCTGATTTTTCTAGTTATCTTTTTCTATCCAAAGACTTTTGAATTTGACTTTTTCGTTGCTCTCTGCTTTTT  
TTCTGTTCTTCAAGGGAGATTTAAAGAAAACATTCAGAGCGAAGAGCATCTCTCCGAATTTTTCAAGGCTGTAGAGA  
AGCCTCCCCTAATTTCTAATTTTTGGGATTTGCAAGATGGAGAATCTGAGGAAGAACTCGCTCTTAGGACAAGTTTGATG  
TATGCTCTTGGTGTACTTCCCCATATTTGAGGGTGGAAACGAGATGGGTGAATACGGTCTATGTTCTCTCATCGAGTCCG  
TCCAGAGCGAGGAAAGTTTCGCCAAAAGAACATCGCGAGGGGAGACGTACTTTTCAAACCCATCGAATTTGCCATAA  
ATTATGGGAGACAGATGGGTCTATAAACTCTTTTTGTCTATGGGAGAAACAAGTATTCGAGAAAAATTTGAGTTTCCGG  
GACTTTGAAACTTTTGGAGCGTATACGAAACGCTTCCCGACGAAAGAGAAGAGTTTCGACGAACTGTTCAACAGCGAATC  
TCCGACCAAGGAAATCTTTGACCTTGAGACGCAAGGTACGCAAAAGGGAAGTTAAACGAGAAACCCATATTCGAACTCT  
TTGTCAACGCGAGAAAAGTTCCTCCAGAAAAGAACTTCCCGGCTTTGAAAGACTCTGGAAGGGAAGGAGAC  
AAATACAAATATTTCTCCATATTTCTGAGCAGCGAGATGATTTGAACTTGAATCTATGGGTGGTTTTATCCAAGATTT  
TGCAAAGTTTTTACAAACAAGAACAGAGTACGCCATTCTTACGAAATGATGGACAAGCTCATCTACAACCGAAACAGAG  
GAATTCGCTCTCCACTTTGAGAAAAGTTCGGAAGTGAAGGAAGCTTGACTCTCTTTGATGGAGAAGACATTCGAGAA  
TTTTTCGCAACAGCTCATCTTCCAGGTATTTCCGTCCTTTGGAGAGGAGAAGCAAGAGCAAGAAAGAAAAGGAGAGA  
GGTTCTCGATGAGTGCAGCAGCTTTGAAGAAGCTTTGATGGATTACGTTGAGAAGAAGCTCGACAACCTGCTTTGATGTT  
TTCTGAGGGGAGAAATGTGGAGACTTCAAAGAGTCTCTGGTTGTCTGGAACCATTTGCCATCTGTGACAGAGAACACGAA  
AAGGACAACATGTTTGCATTTCTGCAAGGTTCCGACTCTACCTCGGATGCTATCTGTCGAGAAAAGGAGAGAGGTCGAT  
ACTCTGTGTAGGAAGGAAGGAGCAGAGAAAAACAAATGCGCAGAACGAACCCAGCCAAAAACCTGACCTTCTCCCTTT  
GTTGCGATGAGGTTTATCTGTAACCGCAAGTCCGAGAAATTTGTCGAAAGGAAGAGATGTGGGACTTTTCTCGCCAGCGCC  
ATGGGGACGGGAAAGACAAAAGCTCTGGCGAGGTACCTCTCTCCATCCAAACAAATCTGTTTTGGTCTGACCTATCG  
CAAGTCTTTGGCGAGAGACTTTCAGGATTTGAAATTTCTGTTTTCAGCCACTACAAAGAATCTCCAGATTGACAAACCGAG  
AAAAGCTCATCGTCCAAATAGATTCACTTTGGAGAGTCGATACGTCGAGATACGACATCGTTGTATGCGATGAGGCGACA  
TACACATTTCTCTGTTTGGCGAAAAGGAGTCAAGAATGTTTCCGGTTGTTGGAAGACGATGAAACATCACCTTCAAAGGC  
AAAAGAAGTCACTTTATGGACAAGAACATGTCTCAGTCGCTTGTGGAGCTCATGAAACTTTGGGGTTGAAATGTCACG  
TCGTCAAGAACGAATTTCAAAGCTCATACGCAAAAGAACTGCTTTGTTTGGCCAGATTTGAAGAGTTTAAAAAATTTCTCT  
ATTCATGACCTTGAAGAGGAATGAAGCTCTGTTTTGCGAGCAGTTCAAAGAAGAACTTCAGATTATCTGCAAGGAGGC  
AGAAATGCTCGACTACAAAGTTTTGTGTTATACGGGCGACGAAATAGTGAAGAGGTTTGGCTCGAAAGTTGGAAGAACT  
ATGACCTCGTTGCTTACAGTCTTACAATTTCAAGGAGTAAAGTATGAAGAAAAACACTTTGACAAGGTATACGGTTTAC  
TTCACTAGTCTGCTTCCCGCAGCAAGAGTGCAGCAGATGCTCTTCCGACCCAGAGACATTCGAGCAACAGGATGGT  
CGTTTTGCTTTGACAAAGGAGTTCTCCGCTCTGTGACTCGAAAAACGGCAGCTTCTCTTTCGAAAAGAGACTCAAGG  
TCATGGACTCTATTTCTTGTATTTGGATGGGATAGAAACACAAAGGAAGACCTTTGAAATATGAAGCATCCGTTTACAGCA  
CTTTATGTTGATACGGTCTGTCAGGAAAACATCTCGAAACGGACATTTCTGGAACACTCATCAATCTTTGAAAAGACA  
GGGAGTCACGATATACTTTCGAGAGAGCAAACTCTCTTATAGAAAAAGAAAGAGCCAGACAAATAGCGAGAGAAATAG  
CAGAAGAGGTTGAAAGAAAGAAATTTCAAGGCATATCTCAGCGAGAGAAGTGGAAAAGACAGAGTTCTCGTATCTTTGC  
GCTTTGGAAGACAGAACGAGGGAAGAGAAATTTCAAGTGTAAAGGTTTATGTCAGGCTCATCTGTTTGGAGTGAACAAAA  
AGACATCACCGTCAAATTTCTAGAACAGTATCATGTTGTCAGCAAGCAGTTCAAACACAGAGGATGGCGCTGTTTCGGAA  
CACGAGAAGAGCAATCTCGAAGGCTCAAGGTGTTGGCAAGCAAGAAAAAGCAGAGCGAGAAGCGATGGACGGAATAGAG  
CGTCTCCAAGAGAAGCAAGCTTTGAAAAGTCTGTTATGCGAGAAGGCTGCTTTGAAGCTAGGTTTCTCGGATGTTCCG  
GGAGAAGAAAAGATACTTTCGATGAGATGGCGAAAAGGCTGATTTAGCAAAGGAGATGATACGGAAGAGCAAGAATTT  
TTGGAATGAGCTTCCACCCCTCATATTTTTCTTTTTGTTTTCCGTTACAGTTCGCAAGGGGTCAACTTCATTTCACTT  
TCTATACAAAGGAATTTCAAAAAGAAAGGCAATTCAGCTGGGTGTTGTTGCTTTTCTCTTGGAGCTACAACGGAGTTGT  
CCCAACACAAAGGTTAAACTCGCAAGGATGTGAAAATTTCCGAAAGTCTGCTGGCTTTGAGGTTCTGATAATATTTTAAAC  
AAAAAATATTCGAGAATTTCCAGAAAACAAAAGAGAAAAATATGAGGGGGTGGAGAGCGGTTGAATCTTGGAAACCCGGTCTG  
TTGGAATGAGCTTCCACCCCTCATATTTTTCTTTTTGTTTTCCGTTACAGTTCGCAAGGGGTCAACTTCATTTCACTT  
ATTTGTTACAAGTGGCCTTCCATGTTTTTTGTTCTATCTTTAGATACTCTCCAAAAAGAGTTTCTCTCTCTTTTGT  
TTCTGCTCTCTTGTCTTTGAAAAATCTCTCTTCCACCCCTTTCCGCCCTTGAACGTTGAACCCAGATTTTGAAGT  
GAAGTTGCAATTCAGCCCTTTCGCTTTGTTGTTGTTATCCGAACCATTTCCACTGTTCAAACGAGGGGGTTTTCCGTTTTCT  
TTCTCATGAGAAGATGGAGAGTTTCTTTCTTTTTGTTTTCTGGATATGACACTGCTTTGCAAAGGGCCTAAAGAAATATTC  
CAAAATCTCTCCGTTTCAAAACAGCAAGACGACAAAAGTCTTCCCCAAAGTTGTACAGACGGAACGTTCCGTTGCTT  
TCCCATTTCCGAAACATTTCCCTCAACTTCGACTGCGACTCCCTTTCCACAAGAAAGGACAACTTTGATATCTCCGTTCTT  
TTTTTTCTTTGTAATTCAGGAAGTCAACAACAGAACTGAAATCTTTTTCTTCTCGAAAATTTCTTGTACTTCCGAG  
CCACCCCTTTCGCAACAAAAGTCAAAGAGCCATCTGGAAGCTCGGTGCGCCACACAAGGAAGCCTTTTTTTCTTTTCTCT  
TCTCCACCTCAAATCTCTCTTTGATACCGTTCTGTGGCTTCCCCCTGCTATCGAAAAATTTAAACTTCCCTTTTGTCA  
AGAAAGTGTGATCTTCTCATGAAGAGTTTTTGGAAAAGAAAGAGCTCGTTTCTTTTCTGTTCTTCTTCTTCTTCT  
CCACAGAAAGAAAAGTTTTCTGAGGCAAGTTATAGGGCTCAACAAAAGAAAGGACGGAATTTGGACTGTCCTTCCAGATGG  
GACAACGGTCCATCTGGAAGGTTTTCAAGGAGAGAAGACGGGTTCTGTTCAAAGAGGAAAGGCGCACGGAAGCTTCTTTGTTGG  
GATAACGAAAGAAATCTTTGACTGCGACGTTTGTGGATGGAGAGATTTGGAGATGGAGAGCCGCTTTCCGAAAATTTCT  
TTTTTCGAGAAAACAAAAGAGAAAGAACCTTTCATTTCTTTTTGGGAGAGAAATGGAGACAGGCTCGTCTATCGAAAAG  
AGCTGATGATGAACGCATCCAGTCAAACAGCGTTTTTTCTTGGCCGTTTGTCCCTTTTGGAAAAGAGCCGCTCTTTACG  
TTTGGCAAGCAAAACCTTTTGGAAAACAGAGTATTTCCCTGATAGACCCAGCGAAGAGAAAAGTGTGAGAAAAGTTGGGAGAA  
CATGTTCTCGTAGATTGAATGAAGCAAGACAGTAAATTTTACAAATAAAAATTAAGAAATTTTCCCAAAACG  
AGAGTTTGTGCTTTCTATGTCGTTTTCGAGACAACTCCAAAGAAACGGAATTTCACTGTCTTTGACGGTGAATGGATGA  
AACTCCAAACTCTCTGCCGTTTTCAAAAAGACGACATGACGATTTTGTGAATACAAGGGAAAACCTCCCCACGGA

TTTTATTTGGAAAGTGC GGAGCGATGC AAAAAACAGGTT CGTTCATGGGTTGTTTTTGAGTGC GCCAAAGTGT TTTCTTTT  
GGAAATCTCGTTCGAGAGACAAGGAAATATTTGTCTGTCAAGGAACAAGAGAAAAAGGAAGTATTCACTCTCAAAG  
TTTCAAAAAACGGAACGCTTTCGGTCCATTTCGCGGTCCACAAAGGGAATTTCTTGCCTCCCTATAAATCCC  
CATGTGCGTTCGTTGGAAAGTCAAGGGTATGCGCACATTCCTTACGGAGAACGCACAAAAGGAGGAAAGTAGAC  
ATTCACGAACTGCGAGTTTCCAAGGTTTCGTGTGCGCAGCAATAGAAAAATATTTATTTCAAATATTTTATGA  
CACATGGAAAGATTTCTGGAAAAGAGAGAAAACCGCGTTCGGTTTCTGAAACGAACTGAACTCGAACCGAAA  
ATTTGAACAAGAGCGGATTTTTCAGGAACAACTTTACATCGCTCTCGAACTGCGGTTTGGAGAGTCTTCA  
AAAGGACTCATCGCTCCCTCAGCAGAGGACTCCAATTTTATTTGTGCGAAAGTTGCGAGATGCAAGGACG  
CACGGAAAGATGGTGGAAATACCCGACAAACAAAAGAACTGGTAAAACCTGCTTTCGAGAGAGCCGAGTTT  
CAAGCTCCATGGAGAGTTTGGGTATGGAGAAGCGTTCGCTCCAACTAGGGCAACATTCACAGAAGGAAAG  
TCGAAAACAATGGTACATCTTCACTTGTCTTTTCGAGAGGAAAGGCAAGGCAAGTTTTTATACAGAAGCTG  
CTGCATTTCTTGGACAGAAAAGGAGGAAATATTTCTTGCAAAACTTTTGGAACTGATTCATCAGAGGATTT  
TTGGAGGAGCGGATTTGCACCCCTTCTGCTTTTAGAGGCAAAGTTTACGATGAGAGACGTCGAAATGGT  
GACATGAGGGACAAGAGAGTGCCTGCTTTCGACAGAGCTTTGAAAGAGAGGACGGTCTCAATAGATTGAC  
AGTTTTTCCATCCAAAGAAAATGTGAGAAATTTACCTCGTGTGCGAAGAAAGGCTTGGTCTCCTCCCAAC  
TTTACGCTCTCAGAGCAAAAGGAGCTTCTCAGCTTTTGGAGGAATTTTCGGAAGGGGCGAGGAAATCTT  
CGGATAACAAGGACGAAAGTGCACCAACAGTATGGGACACAAGAACTCACTGACGAACTCGCTGACGCTC  
TGGAGAAATATATGAAAAGATGGGATACACAGCGTCAAAAAGGCGAGAAGTCTCTTTGTGCCATGAAGA  
AAACTCTCCCTGACGCTCAAGGCATTGAAGAGGAGAACTCTTGTCTGTGATGAGTCCAGGTCGTCACAG  
ACGCTTGTGAAGACGATGAGTGCCTGTGTTGCACTCTGTGGATGCAACAAGCTGAGAGAAATCTCTTTCT  
ATATTTTGTGTTTCAAAAAATATACCAAGTATGGGACACAAGAACTCACTGACGAACTCGCTGACGCTC  
GGATGTCTCGCAAAGAGGAAAACAGAAAGGATATTTCTGGAGAAAGAGGGGACAGAAGCAAACTTTACAG  
GGGAACTTGAAGGAGAAAGGGCTTTATCCTCGCAGAGATGAGAAGGCGCAACCCGAGCAATACATGACCC  
AAAATTTATGGGAAAGCGAAATATAAAAATTTCAAAAGAAAGTTCTTTTGAAGATGGAAGTTTCAATAT  
TCCTCAAGAGGTGCTTCTCGAGATTTTGGCTTTTGGGAGAGGACTTCTTTCGAACTCGAAAAGTTTGT  
TTCTGCGTCTTCTGTTGGACAAACAACTTTCGCAAGCTTTTCAAGCATGAAAGGAAACAGAAAGGAAAT  
TGCTTCTTGTATGATGAAAAGGTTCAAAGTGTACGGACAGTTCAGAGATTGATTAACACAGAAACCAGAG  
CTGCGCTGGAAATAAATCTCTGACCTCAGAAGGAGGATGGCAGAGAACATGTCCTCCCGCACTATCTCGT  
AGTATCTGAGGGAGAAAAGCGTGTGACTCCCCAGATTGCGAACTTCTCGACCCAAAGAAAATATATTTG  
ATAAAGAACCTTGTCTAAGTTTTGTATTTGAAAACCTTTCACAATGCACTCTGATCCTCGAAGCGATGAG  
TCCGCGTTCTCGAGACGAGGAAGAACATTTGGGAGACTTCGGAATGTCTCGAATTAATGAGCGCGATGAG  
ATTCCAAAGGCAGAACAAAGGTACGCTTCTGTCTGTTTCAACGAAACTCTCTATGAAGAGACTCATGACA  
AGAACTTAAAAGGATGGTTCGCTTTCGCGCCGACTGGAGCTTACAGAGTCAAATGGGAATTTTTCAGAA  
AAATATAGCGGATTTATCAGAAACAAACGCCATCTGGTGGGAAACGGAAGAGGCTTCTCACATCACGTT  
CGTCTCTCTTGAAGAGATTTGAAAGTCAAGTGTGTTTGGCGAGCAAGGGTACACCATCGTTGACGAGAT  
TGAAACCCCTTGCAGACAAGGAAAGTTCGCTTCTGCTGTTGAAAAGAAAGGAGGATATCTATTTT  
TGAGTGCCTGTCTCGAGAGGGTCAATCGATGCTTTGAAAACCTTATATTTGTGTGTCAAAATACGGAAAG  
GGAAAAATCTCTTGTGCTGAGAAAGCGCCAGACGGGAAAATGTGGGAGTTCACTGTTCTGTTCTTTGAA  
GGAGATGTGCTGTTTGTGGATGTGGGAAAGGCGAAATTTAGAAATGTTTGTGACACCAGGAAAGCGTCC  
GATATTTGAGGATAGGCATCTCGAATTTAGGAAAGATGCAAGAGGCATCTGCGGATCTCAATCATCGAG  
AGGAGAAAAAGATATGAAACACCTCTTCTCTGTGCTGTTGAAAGCCGAGACGAGGAAAGAAAGTCTCT  
TCTGGCAAAACAGAACAAAAGGTTGCAAACTCTCTTGTCCCGCAGAGGACAAAATTTTCTCCTCCCAAG  
AGTTTGAAGCGGACGATGAGAACTTTTGGGAACTTTAGGACAAAAGAAATAAATATTTGCAATAAATAT  
CAAGCTTCTTGAAGTTCACAGGTTCTTGTAGCGGGATTTTTAGAAATGCAACTGTTTGCAGTAAAAGT  
TGTGCCGAAATTTTGCAGAGTGCAGGTTTCTCTGTCACTCGATGGCGGAGAGTCACTGTTTGGCAGAA  
GTATGCGCTCCCTCCACAGTCAACCCACAGACGTTAGAGAGTTCGCTTTCAAATGTTACTTGCAGCAG  
GATGAGACGTTGTCGTTTGTTCACAGCTGTGCGGAGTTTGTGCTTCTTGGAGGTAGTAGATGATCTCG  
GGCGGAAATGTGAACGTAGTCCACCGCTGAGGGGAGCGGAACTATAACCTGCGTCTGTGCTCCATGAC  
TTCCGACGTTTTCGCTTCCAGAAAGCTGCAAGACTGAAATTTCAAATCTGGAAGGGCTGGCATCTGAG  
TTTTCCAGAAACCAGCCAGCGTAAACGTTTCGTTGCATTTTATTCGAGAGACTCTCTTTCGACGCCAT  
GGTAGAGACGTTGTCGTTTGTTCACAGCTGTGCGATGACAGAACTCTCCTCAAATAACAAGAAATTTG  
TACCTGTGACAGACAAGTACCCAAACAATTTCAACATTTGTCTGTTGTTGGTGTGGACAAGCACTGAA  
TTCCAGTCTATCCAAAGGTATCCGGAAGGTTGGTTTTTTTCCGAAAGATTTGTTTGGTGTGTTGAAAG  
TGTTTGAAGTGTGTTGTTGCGATGTTTGTGCTGTTTGTGGCGACTTACTCTGTAGAGTTCCAATATCC  
GCAACTTCCCTTGCAGAGTTGTGACGTTTGTGTCAGCGTGGAAATGTTTGTGTTGTTTGTGCTATGTT  
TGTGGCGACTTGCACCTGCAATGTGGTACGTTAGTTTGCAGCGTTCGATATCCAAAGGTTTGTGGCG  
GCAATGTGGTACGTTTCGTTTGTAGCGCCCAATGTCCAAGGTGTTTGTAGCAACATCCGCTTGCAGAA  
AAAGTGTGGTTCGCCACCTGAGTTTGAAGCGTCCGATGTTTGTGTTGTTTGTGGCGACTTGTCCCTGC  
GTTTCGTTTGCAGGCGAGAAATATCCAAAGTATTTGTATTTGACCTGAGTTGTTGTTGTCGAGACTT  
AGATGTCGTGCTGTTTTCGCGGCGACTCTCCTTCCACAGTTCGTAAGTTCGACATTTGAGAGCTGAG  
GTCGTCACCTGTTGCTGGAGTTCGTGACTGTGGTGTTAGAGTGGTTACTTGCCTTGCAGATTCGTAAC  
CAGAGAAGAGACCTGTGATTTAGAGTTCCGATGCTCGTGTGTTTGTGCAACTCCGCTCTGAAGAGA  
CTTGAAGACGCGGATGTTGACGTTGAGCCCTGCCGTTTCGACTTCAAAGCCGCAATATCGGCTGTGTT  
TGTGCAAGAGGTTCCGATTTCTCCAGCATGACCCACTGCTCTCTGTGACATATAGAGATTCGAGTCTG  
GAGCAAAATAAGAGTTTCTCTAGGCAAACTGCGGAAAGAACAGAAACGGATGCGATGAGGGTTATGTC  
TTTTCTCCCTCTGCATCAGTGTACAAATGAAACAAAATATTTAGAACAGAAATATTTTAGCTTATTTCT  
ATGCCGTAAGTAATGGATATCGAAGCGTTGTTTTTGCACAAGGCAAACTTAGAGAATTTTGGGACAG  
GGATTGACAAAGAGGGTTCGATCCGAGACGACTTGGAACTGCTTTCGAGCTGTGTTGCAATGTTGAGAC  
TCGTTGGATTTGTGTAAGGCTTCTCCTCAAGCACAAAATAAATTTTTACATAGTTGCGAAGGGTGTCT  
AGGGATAATCCCTGTCCTTCTCAAATTTTGGATGAAAAGAAATGAACAGCCACAAGAAATCTTTGTTAT

TCCAAACGAGATAGTGTGCACATTTTATCTTTTTCGGAAGCAAAGGATGTTTGCAGCTTCTCAAGAACAACAAAAGAAT  
GTTTGTCTGTTGGCAGAGGACGAAAAGACTGTGGAAACAGCTCTGTGAGAAGAGAAAATTTCCAAAGAGAAAAAATGCGATG  
GCTGGAGAGAAATGGTTCGTGAGATGATAAAAAGGAAGCCCTCATGCTATCGGTGTCTGCCAATTCACAAAAGACAGAG  
AGGTGCATGAGACTTCTTTTCGCACGGGCAAGTTCGAACTTTTCATTCAACGATAAAAATATTTTGCAAAAATATTT  
AAAACCTTCTCGTCTCTCTTTGTGCGTATCTTCAAAGTTTTCTGTTCTTTGAAGCTGAGACCTCCGAATTTCTCCCT  
CCTGTGGGCTGGATTTTATGGCCGAGAGAACTGCTTTCTGAACTTGAGAAATGGTTCATCGTCTTTCTCACCCGCTAGCT  
CGGGAAGTTTTCTGTCGTCATCTCCTTGTAGTGGTTGAAAATCTCGCTCACAGTCAAGAAAGATTTCTCTTCGTCTTCTT  
CCTTCTGTGTCGATGACGATGCATCTTCTGATGTAATTTCCGATCGTGTCTTCTCGCCCTCATCTTTGCGGTGGCGGCC  
TCGACTTCTTCTGTTTCGACAGAGACCTTCTTTGTACTTTCTGAAATCTTCCAAACACAGCCACAAAAGAGCGGTGGC  
AAGACCCGGAATTTTCTCTTCAAAGTGTTCGTCCGCTTTGAAACATCTTTGCTTGTCTGCGAAGTTCTGGGTCTTCTATCC  
AGTTTTCTGTCGTTCAGACAGGAATGTCCGCTCGAACGGAATGAGTCGAATCTGTTCCATGTTGCTTGGTCAGAGCCA  
GGAATCCCGGAGGTTTATTTGGCCATCATGAAGATCGTGAACATTTGGCTTGTATGTCCTTCCCTTTCAAAGAGGTTCTCT  
CACAAGAACGAGTCTGTTACAGAGAGTCTTTTCAAATTTCTGGGTTAAACTTCTGTTCTGTGAATCTTTGGATCA  
CACCATACTGTTTCCCGGCGCTCTTGGAGTTTGGGACGGGACAGAACTCGGGTTTCCAGCCCTTCCAGCAAGGCACATTT  
TCTCCAGGAAACTTTATCAGGTACTGTCCAAAGATATATTGAGAAGAGAAAAGAACACAGACTTCCGTTGTTTCCCTT  
GCCTGTGCAGATGTAGATCTTTTGTCTTATTTCTCTTGCATGCAAGAAGACACCATTGCAAGAGCACATCTTCTGA  
TGCGAGGATTCGGGAACAACCTTTTGAAGAAATTCGCGACATTCGATGACTGCCTGCTCTGACAGGATTTAATTCG  
CTGATTTCCGTAATCATCGAGATAAAGTCTGACGACTTCCATCTCGGAAGATTCAGTTCACAACTCCGTC  
TTCCATTTCCAAAGATCCCTGTTTTCGTCCAACTTTGAGAGGAATGTTTCGTTCAAACACAGCCCTTTGCGACATCGTCA  
TCATCTCTCGAAGAAATCTTCCATCTGGAGTTTGGACTGGATGTCACGCAATTTTAAATCGTCAAGTTGTGCGTTCCGG  
TCTGAGACTGCCCCGACACCCAGACATCTGTTGATCTCGAGACGGAATCTTCTGGGAGCTCAAAGCTGATAATTCG  
CATCAACTCGTTTGCATCGTCCAGTTTGTACCAACGATGACCTCGGAATTCGTACCAATGTTTGCCTGCAATTTGGCAC  
AAATGAACCTTATCCGAATATGACATGGATCAGACTTGCATGTTTGCATGCGTTGGTTTTCGATGCCAACGACGCCCTCT  
TGCAAGACCTTTTGAACCTTTTCTTCTTCCACTCGCCATATTTTTCGGGTTGTGCTTCTTGGCATCTGATAGACT  
TCCGATGCTTTTACCTTTCATCTCCATCGTATCCCAAAGGATTTGCAATTTCTTCTCGTCAAAATTTGTGCTCTCGAGC  
TGAAATCTATCCAAAGTTCGAGGCTTCTGGAAGACCGTTCCCGATATTAACCAAAGTCCAGCCTACATTCAGTCCG  
TCATAGTTTTCGCGACGAGTCTGCGACATCTCCAAACTCTCGAATTTGCAACTTCTGCGAGATCTTGCATGATCTG  
TCTCCACAGTTTGTGAGACGCGTGGTCTCTTTCGACGCGTCACTCTTCTTTCGTTGAGGATGATCTTCCAAAGCAGTGG  
GGTTGGCTCTCTTCTCTGATGACATTTATGTACGGAAGTCTTTGGAAATTTCAAGATCCATTTCCATCCGCTTCC  
TCTCCGAGCAAAAGCCTCCACATCAATCTCTTCCAGCTCGTCACTGTACACTTGTGTGATGTTGACGGCTCCAAAGAGT  
TCCGATATCTCTGGCTTGTGTAGCCATACATAAGCCATGCTTTCTTGTGAGCGAGTGCATGCAATTTTCTTCCAGGTT  
CGAGCATTTCCGAGGCTTGAAGCTCCAGTTTCAACGAGTCTTTTCAACACTTTTGTCTCATAAACACATTTCCGACG  
TTTGTGGCCACAATAAAAAAGGAAAGAAAGATGGAATCCATCTTCACTTGTTCGCCAGAAAGTCTCGGCCCTGACCT  
CTCAAGGACGATGATGACAACTCTCTCTGTCGTTCAAATTCAGGGACGATAACCGGATGACGTTTGTATACGCAC  
GGATCACAGCCATGACATGCTCTTTGTGTATTTTCTTGGCATCTTTTGGCAGATCTTCCGAAAGGAGTGTGTGTCAGGAA  
TCCACGTAGAGAGGATGGTACTTTGGATGGCATCTCTGTGACGCAAAAGAGTGAATCCGTTCTCGACAGCGTTCTGTAAC  
CTCAAAAACGCTTCAAATCTTTACTCTTCAATGGCATACTTCCAGAAGGAGAAAAGGAGTGTGTGTCAGGAA  
TTCCCTTGGCAACGAAAAGAGTCCAAAACGCAAAAATATCCCTGGTCTGTCTCTCGCCGCAATTTAATTTTGTCTC  
GGAAACAAAACCTCAAAGCGGTTTGGAAATCTCAACCTTTTCGGGTTTTTCTGAAATTTCTTTTCAGTTCAAAAGAA  
AGAAATGTGTAACCTTTTTTGTGTCTTCCCTTCTTCCGACAGAAATTTTGTGCAACATCGTCCGCTTCTGACAACA  
CAAACCTGCCTGTCCGTCAACAACTCTTTCATCACGAGTCTCTAGAAAGATGAAAGCAGGAAAGGAAAGAGAGGACT  
TCCCTCTCGAAGGGGGTCAATCTACGGAATCGTGTTCGAAAAATGACAGAGAAGGGCATCTTTCCGCCACGCTGC  
GCACCTCAGGAAACAAACGCTCCCTCAAAGAGGTGATGATGATACGACAAAAGAAATGCTACGCGGAAAGCAGAGAACG  
CACTCTACTGCGCTCTTTTTCTGGAAACAGAAAGCTTGCACCTGCGGTGAAGAAGAGGTTCCGGGCAAACTGTGTCT  
GGATTTTCATGGCGGCTTGAAGGAGGCCACACAAAAGATGCTCTCCGCTGTTGGAAGAAAGATGGAAGAAAAGTCCGAGA  
AAAAGAGAAATCCGATTTCTTGGCATGCGATCGTTCGAGCTCTCAAGTCGGACAAACAAAGAGGAGTCCCTGTTCTCC  
TCAAGATGGGAGGAGTCCCCACACAGACTCTTTCGACATTTGTCGAAAGAGCAGAGACTTCAAACCTTCAAACCTCTC  
CTTGGAGCGGACAAGATGCAACGAGAGAAAGAGCTCTCTCGCAGCCATCAAACCAAAGCAAGAAATTTGTCTTTGC  
GTGCTTTCGCGCAGGCAATCAAACAGAAAACATTCACATAGAGTTTTCGCAAAAGACAGACAGAAATGATGCTCTCTCA  
TCTCATAATTTTGTAAAAATATATCAGCGATAACGTTGGATGGCGTCCGCCACAGTCCCGAAAAAACCGTCTCTTCT  
TTTTTCGAACCAGAAAGACTCTTTCGATACCAAAGGAACATCTCGCGTCCACTTTGTTCTTTGAACCCAGAAAGCGCG  
ATTCCGCTTTCGACGCAAAAGACTTGAAGATAACTCTTGCACAAACAGTCAACCAAAGGCTCTGACACCTTTTGG  
TTATCACAAGGTTCTGGTGTCTTCCAGAAGAACTCGAAATTCGCAAAACCCCTCTTCAATTCATCTCAAACAAGC  
TCCCTCCATTAATAATTTTGTGAAATATTTTACTAAAAATCTTTGGTCAATGACACCAATAAACTTCAAAGAGAGAAA  
TCAGACCGTGTCAATCTCTACGAAAATTTCTTGGATGAGCCAGTCAAGAGTCTTGTAAATTTTGAAGACTTG  
CGGTCTCATTCTTTTTCGACGAGAGAGTTGATGTTTTGAGCGGTACGTTGTACTTTCATCAGAGTGAACACTGCTCTT  
TGACCTTGTCTCAAGGAGAAATTTCTTGTGACATTTGAGAGCGATGCCAGCTCAAACATTTTGTACTCTCTTTTGT  
GGGATATCTTCTCATAGTTTTCCTCTGTGGCGGAGAGCTTCTGAAATCTTTTGGACGTTTTTCTGCCGCTTTCAA  
CTCTTCTGACATTTCAATGCTAAATATATCCAGAAATATTTAGAAAATTTGAAATCTTCTCTCTCCAGTCCGCTCCGCTC  
CAACCAAACGCTCTTTCGCAACAAACGTAAGAAGCTGTAGCTCTGTCTTCTGCGAGTGTGCTTGAGTTTGTCCCTTT  
TTTGTATCTCTTAGCAAAAGTCCATCTTGTACTTGGCGAAAATGTTTGGTCCATCGAGCTCAACGATTTTCTTTCCA  
ACGACAAAAGTCTGACGAAAATGTTTGCCTCTCTGGACTTCTGACCAAGTCCGCTTCCGCTTGGAACTATTTCTC  
AGTGAGCGAAAGGCTTTCGAGATGCTTTTTGAGTTTGCCTTGTGTTTTGAAAGTGAACACAGGGCACCAACTGTTTCTCC  
AGAAATTTGAACTAGGAGAACACAGAACTCTCCGTTTCTTCCGAGTCAAAGAGAAATTTGGAGCACGATGCTGTATAC  
ACTTGACGAGGATTTTCTGTTTCTCTCGAACCAAGCGTCCGCTCTTGGATGGGAGGCGAACGACTTTCAAACACCA  
TTTCTGACTCAGATTTTTTGCACATCGGAGGAGAAAGGGAAGCGCATATGAGACAAACAACCTTCTTTTCTTTGTCA  
TAGTACACAGTTTCTGTTGAAATTCGTGCTTGCAGACATTCGAAAGATATCTTTTGTGATGATGAGGTTCACT  
TCACGAGGCTTTTTCTGTTCTTGAAGCTCAAATTTTCAAGAGCGGGTGGACGCAAAAGAAAGCTTTACGACCAAGA  
ACATTTCTTTCTTCTTTCGCAAGCTGTCTTCCACAGAAAGAACCAATATCCCTTGGATGATGTCGGAGAGAG  
GCAAAAAGTGTGCCCGAGTCCCCACAGTCAAAGAGGAAATATTTATGGGTGGAATGCGAACGCTCTCTCGGAGACCC  
TCGTTCTCTGAACTCAAATTCAGCCATTTTGTGGTGGCGAAACTGGCTTTGTGGCAAAAATCACAGTCTCTCTTTG

GCACATTTTTCTCCCTTGCAGTATGGACACCAGTTCCTCCTCTTTTGTCTGTGCATCATCATCGGTGTCGTTTGAAAA  
TGTGCAAAACATTTCTTACAGTCGAACCAAAACCTTTCTTTCGCAACCTTTCTTATCATTCTCGGGTCCTCTACATTTCTT  
TTGCTCCAATACTTTGCTTTTTTGTGGGATGCGATGGAGTGTCTCAAAGCAAGAAATGCATTTCTGTCTTACACAGCTT  
GCTGCGACCCAAACGAAGAACAATAAGGGCAAGACGCTTTTTTGTCTTTGATAAAATCCGAGAGTTTATGGGGAACTCGT  
GAGAGCACTTTTCAAAAAGAACAATAAGGACTTGCCCGTGGATTTCAAACCTTTCTGGGACTTGTGTCTTTCTTTCT  
GACCAATCATCGCTTTGGGATGGGACGCAAAACCTTTTGTGAAACAAATTTCAACTCTTCATCACAGAGTTTCCACC  
TCTCAACGAACAAGTATCTTTTTGAAATTTTTTGGAGCTCCAAAAAATTCGTGATATCTTCCCTTTCAAAGAGACATT  
CAGGGAAGAGAGTCTTCTTTAAATGCGCCAAAGGAAAAAGAAATGGCCAAAAGACGCTCAACATCAGACCTTTGGGAC  
CTTTTGAATTTTATCCGTCGCGCAGACTACATCGCCTCGGCCCTCGGGCAGCGAAAGTCCAATTTTGTGCGTAGTTT  
TTGTTATTACATGCGCCAACAATATCCCGTTGCCAAAATTTGTCTCGGGTACGGAGACAGAGAATCAGACATTCACGAAA  
ATTTTCTCCAGTCTACATCAGCACCAATACGAGCAGCATGCGGAGCTCCAATACGTGCGAAGACAGAGAAAGGCAAAG  
ACAGACAAAAAATGAAAAACTCATCCGCTATTACGTTGTGGACGATTTGCGCTGATGACCCAAAACCTTTGCGTTCTCC  
TCTCATGACCTCATTTCTTCAAAAATGGCTCGAGGCAATGGGACGGAATTTTTATGCTTCTAACTCAAGCCGGTTGGATG  
CTCTCCAGGGGTAAGAAAGTGCCTTCTTATTACGTGCTTTTCTACGAGGCTCTCTTGTGCAACGCGAAAACTGTGG  
CGAACTTTGGCTCGAACTCGGAATTTCAAAGAGTTTGGCAGATCATGGACCAAGTGTGCGTGCACCCGCTGTAT  
GGTATCGATAACGAAACGAAAGCAAAACATTGAGGACATGCTCTTGTGATCGCGCGCTCATCCCATTTCAAAGT  
TCAAGTTTGGTTGCAAAACGATACAGAAAGTGGAGCAAGAAAGTACAACAAAAATATGAAACCCCTCTCATTTAAATA  
AAATATTCAAGATAATTTTTTATGGAGAGACTCGAAGAAATCCAAAAAAGTGGAAAGGCGTCTTCACTGCACAAAG  
CATTTGCGTCACTCGTCTTACCACAAAACAGAGGACGCTCACTCTTGTCTCTCCCTTTGTGAAAGAGAGTCACTGGAGAGG  
AGTTGTCTCTTGTCTTCTCGAAAAAGAGTTTGCCTCGTTATCCCCCAAACTCTTTGAGTTCACTCTGAACTTT  
TTGTGCAACTTCGAAAGAGAGGAACTGGTTCTCTTTTGTGACCCCTGGTTGTCCGGTGGTTGTTGCGAGTGGCATGGA  
GAAACAGAAGCTTCGTTCTGTATCAAAGAATATGGTGAATTCATGACCTTTTGTGGAACCAATTTACAGACAGAGAAAG  
GGAAGATGGGCTCGTCTTTCTTTGGTTAGACGAGGAATCGAGATATCCAGATTTCTTTCGAAAGTTTTCGAGAGAAAT  
TCCCAAAGAAACATTTCTGTGGATATTCGATAGATAAAATTTTTATATAAAATTTTGAATTTTATCTTTGAGCCG  
CAGAAGCAACAGCAAGAGTACTCTCGCTCACCATGCGAATTTGACTGAACTCTCGTCTTCCAATATTCTCAAAGGTT  
TTCTGTGTGAGATATGGGGTCTCGGAGCCTTTGACTTTCTATCGAGCAATTTGGCTTTCTTGGCAAAGTAGAGAACGT  
CTTGGCGAAGGATGTGGTTGTTGTAATTTGAGGGAATACAGTTTCTCGAGATTCGCAAGGTTCCGCTCTCTGTGCA  
ACGAGAGAAAGTTTCTTTATTCGCGCAAGAGAAATCCACAGACTTTCCCTCCGCAACGACCAAACTGTGCCATCGA  
AAGGGAATCTTTCAGAGAAGCGATGCTCTCTGAGCCATCTTCTTCCACCTCCGAAAACTTGGAGTTCTTCTTCCAAA  
CAAACTCTTTCGATTTTCTTGAATTTCTTGTACTTTTCCCTCCAGTTCCCTTCTTCCAATCTTTTCTGTTTCT  
GAGCCTCTGCGATTCACAGATTTTCTGTGCGGTGTTTTCTCCGTTGACCAAGAAATTTTCTGACAAGTCTTTCTT  
TTCTGTCCCAAGAAATTCAGGGCCGTGTTTTGTCTTGAAGTACCAAAAAACGAAACGAACTTCCGTTCCCTTCTT  
TTGACCAAGAAGTTCCATGCATTTTGTCCGTTCTTCCATTCTACAGAACAGCGAGGGGTGCCAGATTGTAATAAATAGCA  
TGTTTGTGGACCATCTGTTCTCCAAATTTATACTCTGCTCATAGTCGAGTTTTTGTCTTCCAAAGGCGATGTTTTCT  
CATGCTTTTCTCTTATAAAATTCGAGCTCATACTTATGATGCGCGGAAAGATTCCGCTGTTCTTTCCCGTGTCTT  
TTTTCTGTTGGGAGACATCAAAACCGGCTCGAGTCCCTTTCTTTGCGCAAAAAAGAAAGTTTCAACTCTTCTGCTT  
GCAAAACGTTCCGCTCGCAAGCCAGAAGCTGCAAGAAGTTTCGGATCTCTGAAAAATATTCATCGTTTAACAATATTT  
TTCTAAAACCTTGAGTTATTTGGGCTATCTTTCCGATAGTATCTCAAAGTTTCGAAAGACACTCTCCGAGTTTCTTGG  
GCATCCCTTGTGCTTATGCGGAATCTTGTGCTGTGATGTTGGCAATTCAGAAAGCGTTTGTCAAAGCACCAGAA  
GGCTTCCAGACCAAGCTCTGACAGAACGCATCCGAGACTCCAATGTCTATTCTTCCGAAAGGTTCCAAAGGATA  
CACAAGAAGCTCTGTTGCGCGATAGTGAAGCGTCACTTCTATTGTCACAAAAATCTCTTCTCTCCGAGCAGAGTG  
AAAGACCAAGTTCGACAATTTTGTCTGTTTTCCCATCGTACAAAATGTTTGTGAGGTTGAGATCGGCATGAATTTCTCT  
CTTTTATGAAAGAAATTCGAGACTTTGCAAACTCCCAAAAATTTCTGGATTTCTTCCGCTCGAGATGCTTTCTCGA  
AAGTCAAACGGAAGATGTTGAGGACGAGAGTCTGTGAAAGATTTTGCCTCTCGAACTCAAAGTTTACAGATGTTTT  
CATGACCTTCTCAAAGAGGTCTGTAATTTCTTTCTTGTGATGAGCTTCAGAGTCAAAGGATTTGCAAACGTATGTTTTG  
TAGCTCTCTCTTTTCTCTGCTGCGGTTATTTGTTGCTGCAAGGATGCGATGATTTCTGGATGAGTTCCATCTCAA  
ATATTTATGGAACATGCAAAAAATCTCTGAAAGAAATACATTTTCGCAAAATGAACGAAACCGGCGACAGTCAGAACAGCA  
GAAAACAATGTCTGCTCTAAAAGCACTTTTCTTTCTTTTGGAACTTTTATGCATGCACTTTATACCATACCCCTTCTCTG  
GTGACGATTCATTTATCGATGGACCGAATCACAAGCAAGAAAGCCGTAACAAGAGGTTGATCGTCCGCTTCCAAAA  
GTGATGCTCAAGACCATCTTTTGGCCTTTCAACGCTCTCAAAAAATATTTAGGGTTTTGCTGATAAAAAACTAAAGCAATC  
TTGCGGGATGAACATGCAAAAACTTTCTCAAAGAGATTTCTCCCTTTGTTTTGAAAGGCTGTGACGTTGGAAGACCGA  
TGAGGAAAGATGTCGAAACAGCAACGAAAGGAAATTACTTTCATGAAGCAGCAAAAGGGCTGGGATTTGAACATCGAAGCA  
TCATCGACAACGCGGAGCTTCAAAAAACAGCAGCAAAATATTTGTTGATCTGACAGCCGCTGTTGTTCTGATCGCGAC  
CTCAAAGAGATTCGTTCTCTTGGACTCCCATATTCGGGTTGAGGTGAACAATGGAAGAGATTGGGAAAAAGGGGGCTC  
TGACATCAAAGATAGAAGGCTTCACTGACTCTCGCAGCAAAAGGAAAAATCTAAATATTTCAAAGAAATATTTCAA  
ACAAATATCTTCTTCTTCCAAAGCAGAGTAGGACGGAAGTTTCGACCAAAGGACTTTTCTGGAAGCTGCAATC  
GTACTTTGTGCGGACAAGTTCTTGCCTTTCTTGTGAAATTTCTTCTATCTTCTTCTGCTGCGGAGTACCTATGAA  
AGAGAAAACATTTGCTCTCCAAATCTCCAGGTTGGAACGTTCTGTTCTCTTCCCTTCAAAGCAAAGATTGAGTCCGTTG  
CCGAATGCGATGGGGCTGTGTTGATAGGCTCTTTCTCCGTACTCTTGTGTTTTTACCCTCGAGACGACGAGGTTCAAT  
AATCTTTTTTAGCGCTGGGTGATTTGGAGTAACAGCAAGAAAGCTTGATAAATCTGAAAGACAGCCTTCATCTTTAG  
CAGAAACGAGAGATTTGTTCTTGAAGCCAATCTCGAAGAGGGGAAAGGCAAAACATAGCGGAGTCTGCGTAACTCTCT  
CCGTTCAACCCATCAGCAATATCTAAAAGGTTCTGCTTTGACGCTCTTGAAGCAGGCAATCGTACGCTTTACTAC  
TTTCTGGTCAAAGTGTCCACAAGAACTCTCTTTGCTTTTCTGTTGAAAGTACATATGTTTGTACTCCGAATTTTTCT  
GGACCAAGAGTCCAGTCTCTTTTCAATTCAGGGGAGACTTTCTCTTCACTGTTTGAAGATGAGAAACGGCACTTTT  
TGTGTTGACGTTGGCGTTCTTTTCTTTCTTGAATTTCTGGATTTTCCATTCGTTCTTCCAAAGACTCGGCATTT  
TACGTCATAGAAAACCTCTCTTGAATGTTCCCTCGGAAGTCACTGAAACCAAGAAAAAGAAATGTAAGAAAGCAAAAG  
AGAGGAGAAAGACCAAAAGCCACATTACAGTTGGTGCACCTTTCTAACGATGAACTGCAAGCGCTGATGAAGAAAG  
GAAGCGGAGATCGAAGAGAGAGTCTTGCCTAATGTTTTGACTTTGCTTTGGCATTGCGCGTATAGAGACCTTGAA  
ATATTTTATAAAAAATTTTTTATTTCTTTGAAACAGCCCAACCTTCTTATCGCAAGAGTTTTGACCTGTGCGGGA  
TCACGAACTCCCGAGCTTTGAAACTTTTCAAAGGTTTCGACGAGAAATTTGATCTTCTGTTGTTATGACGACCTTCCG  
ACGTTTCCCTTTTTGACAAGAAGAGATTTATAAACTTTTCTCTTGTGACTCCAGCACCTTTTCGACGCAACACTC

GTGCTTTCCGAAAAAGAGCTGCATAACGCACTCTGTTCTGGACAAAAGAGAGGAGCGGTCCAGAACGTGGACGAGGC  
AGAGAAGTTTTGAGTTTTTTTGGATGATGGAACCAGAAGAACAGAGAAAGTCTCCCTGCCTTATTTTCGTCAACCCCGAA  
ATGCAAAAGAGTCGCGTTCTCTCCGACTTCCACAAAAGGAACCTTTTGACAAAAGTCTGTGTTTATGGACAAAATTTGAAC  
CTCTCTTTCCCCAGGACAAAGAAAAAGTTCCGAACCTTTCCGACAACTCCTCTTTCCACCTTCCAAAACACAGAGTAT  
TTCTCCCTCTTTTGGACAGACATAACAGAGAACTCTCGTCTCTGAGCTTTTCTCTTTCCAGAGACACGGAAAGATAAA  
ACATCAAGAAGACATTTGCTCTTCCAGCAGCCCTGCTCAAATTTTGCAGAGACATTTCTCTGAAGAGAAAACAGATCTCTGG  
AACGAACGCGACATTTGATGGGGTGAATCCCTTTTCGACGAGACGCTTCTTTGTTTCTCTGACAACTCTCGTTGTACCTTT  
TTTGGTCCCAGCCGACGCTGTCCATTTTGTATAAAACACAACGAGACGAGGAACTCCAAACGCTTTTACAGAGTGTGAGA  
TGTTCCAAAGTTTGTCTTCTCCGAGAGCCCTGCTCAAATTTCTCCCTTTTTCGAGAAATCACCAGAGCGCAGATGTC  
AGCTCCACAGATGCCTTCGATGGCATTGGGAACATAATTTCTGTGGCCGGGAGCATCCAGAATCGTCCACCTTTTGGCAG  
ACCATCAAAACACTTCGCGACCCACTTCTATCGTCTTACCTCTCCTCTCTTCTGGGTCTGTATCGAACAAAGAACGCT  
CTTCCCCAGCTTTTCCCGCGCTTCTTCTGCCTCTCTTTCCACTTGTGAAAGGGCTCTTGGGTCCGACCTTTTTCGTGTC  
CAGAGAATGGTTCCACAAGACTGGATTTTCCAGCGTCAACATGACGAGAAACACAGATGCTCATGTGCTGTCCCTCCA  
TTTTTATGTTGGACCTTTTGTCTGAAAATTTAGCAAAAAGAACACCTTCCCATAAAATGTCTCAAATACAAGATACTGA  
CCGTCCCTTGTGCTCTCCACAAATTTCTCTGGAATTTGTTCTCCGTGAGACGAAACAAAAGAAATTTTCTGTTCTTTTT  
ATTATATCTCTTCACTATTTTTCGGAATTTATCTCTTGGAGAGATGCTCTTTCGTGATGTCCTTGTATACAGAGAGGAA  
AGTCTTTTCCGTGGAGCCACTCTCAACCAACAAAAGTTTCTCTGTTCCAAAGGAAATTTCCGCAATTTCCGAAAGCGAAAGT  
TTCTTCAACTCTGGAATCCCTTCTCTTTCGCTCTCTCTCTCCCAATTTTTCGTAGACGATGTCGTTCTCTTGGCAATA  
AAAAAAGGAGTCGAAGCAGACATCCCATTTTGGTCAATGTTCTATCTGCAATATCTCTTTCTTTTCTGAACTCTGTT  
TTTTTGCACAGTGTCTCCGAAGCTCTCAATCTCGAATTTCAACATGTTTGGCTCCCTCGCTTTCAAAGGTATCTCTGC  
CCGAAATGAGGCTATCGTTGCAAGAGAGTGGTTGTGGGCACTCCGAACCAAAACATCACAGCGAACACAGTAACTTA  
GGACCATTACTTTTTACATCCAAAAGTAATATGGACAGAGTCGGAATAATGGGCTTTTCGTAAAAGAAATCTCCCGAA  
AGACCGCAGAGCTCAAAAAGGAGCGCTGGAAACAGTGAACAACATGCTCGTCTTTCTGACAGAGAACTCACCAAAACAAG  
CAACCATCTTGTGGGGAACTCTACTCAATGTTTGGGAAGGGTGTCTCTCTGACAGATAAAAATTTTATGAAATGAAAA  
GGGAAGCATTCACAAGACTTTGCAAAATCTGTTTGTATGGGGAAAAGAGCTTGTTTTCCCAAAAAGAAACAGAGAA  
CCTCATGAGAAAAACACCTGTTTGGAGATCAGTCAAAACGCTGTTAGAGCGTTGACGGCCATTCGAAATATTTTGTG  
GACAAATATGGAAGCATCTTCTCTCAGGCAAGAGAAAACAAAAGAAAGAGAAATTCGACCTTTCCGAAGTTGAGGCGCGA  
GTAGCCAAAAGCAAGAACTCTACTCAATGTTTGGGAAGGGTGTCTCTCTGACAGATAAAAATTTTATGAAATGAAAA  
ATTTAGTAGACCTTTTCTTTCCCTTGTCTTTTCTGGGGCGTTTGGGCTCTTCTCCAAAGACCAACCTGTCTGAGT  
GACTGGAACGTATAAAAATTTCTTCTTGGGAGAAATTTCTCAAGAGGATTTCTGACCCGAAACAAATCTCCCAAGCGTTGG  
GGCAGCAGACAACACCACAAAAGTTTGTCTCTGTTCTGACAAGTTTGGCGATCCAGGAAATGTTGATCGTTCCT  
TCTTCCCAACAGCGAGACTCCACCCCTCGAGTCTCAGGGATGATACCAAGGAAATTCCTTCTATTTGGGAACCACTGCT  
CGTGTACTCGATCTGGCAACCTTCAAGCACCGACTCTGAGTGTCTTAGCATCACTCTATAGAGCTTTTGTATGCTTGT  
CTCTTACGAGCTTGCCATTCGAAGAGTTGAAGTTTCCGCTTTTGTCTCGCACGTGTGCTTCCGAGAGAAATTTCCG  
GAATCTCTGTTGTTTTCGAGTTTCCGATCCAGAACCGACTCATTCTGACTCTGGGAGGCTCGAGTGTGACTTGTG  
CTGGGCTCTCGGGAAGAAATCTCAGAGGGAGTGGAGGTCGCAAAAGAGTTTCTCTGCTGAACGAAAGACCGGCTTCT  
CAACGCTCAACCAACGAAACAGGTCAGCGAGAGCCTTTGCCTTTGACACGAATGTAATCGTCCCCACAAACATCAA  
CGGTACACATCTTCTCTCATTTTGTATGAGACTTCCCAACCACTCTGCTTGAAGGTTGAAGTTCTTGTCTCTTGTG  
TCTGGGCTCTTCTGTTGAAAGTCTTCCCTCTCTTGGAAATGTCACCAAGAACTTTGCTCGATCGTCTCTTCCGCGA  
CCATGAGTTCGATGTGAGCTGTCAAGTCTTCCAAAAGTCTCTTCTCTCTTCTCTCGCAAAGGTCGTACTCG  
AGACGAATGACATCGATGTCTCAGGAGAGCTTTCGAGTTTTTCGAGAGTGAAGGAATCCATTTGGGAAATTTTGAAGGA  
ATTTCTTCTTGGATGTTCAATATTTTTTATAAAAAATTTAGAAATCTCTCTTGTACTTTTTCTCGAAAACGTTCCAA  
TCGCCCTTCCACATCTCTTTCGGTGTGCGTTTCAGTGTGCTCTGATGTTTCTCTTGAAGTTTCTCAAATCTCTCCGAC  
TTCTCGAGTCTGCTCCCTTTGTGAGAGTTCGGATGGGCATGCTCACAAGGTAATCATAGCTGTCTTCCACTTGTCTATAGC  
CCATTTCTCCATATTTTGGAGAAAGAAATTTCTCTTGCATCTTATATCGAGAGCGCCAGAGAGAACGCTCTGCAAAAAC  
CTCTGCTGTTGCTTGTGTTGAGAAATTTCTTGGGAGAGGTCAGCGAGTATTTTGTCTTCTCTTTTGGTAGAGTTTCGAG  
ACGAGCAGGCGATATTTTGTGAGGATGTCATCCACAGTCGCAAAATTTGATGGGATATCTTCTTCTGTCGAGAGCTGCA  
TGTTCGGAAGAGAGAACGTAGATGAGAGCTTGGAGTTCTGACTGTCCGAAATAAAGTCTTTTGTGGTGTGATGACAAAA  
GACGCTTTTCTGTCGTTACTTCTCTCGAAAGACTTGTATGCTTTTGGCTCTCAAGATTTTCCAGATGTTTTTGGCA  
ATCGTAGGTCCAAAGTCTTACAGGAGTTTCTACAATCTTCCACTTTGTTTGGACATCTTTTCAAGAACACCAAAATGTTT  
TCACCTTGCCTTCTTCCACTTCCATCGTTCGGTGAACCCCTTCCACCAAGGAGAAAGTTTGGAGTCTCTTGTCTCATCC  
AACCAGCAAGAAATCCATTGACAAACTTCAAGCGGATTTGTGAGGAGAAATTTCTGTGCTGTGACCAGTTCCGATCGCGCA  
TGCTCCGTTACCACAATCAGAGGGATAATGGGGATGTAGTTGATGGGTTCCGTTATACTCATATCTCTCGAAAACCCCTTT  
CGTAGAGTCACTGCTTCCGGGGGAAAGACGATTTCTGGTACCTTTTCGAGGTAGGAACTGAGATATCTCGAAGCAGCA  
TGGTCTTCCCTCCACGAAGAGCTGTCCAAAAGACCCATCAGGGAAAAGGAGACGACGTTGTTGCGCAACCCACAAA  
GTCTTGGCCATTCCGATGATGTTGTTGTGAGAGACTTCTCCGTGGTGTATCCGGCAACCGAAGCGACCTTCCCG  
TCAATCTGTCCACATGTTTCTTTTGTCTTTCCGATGATGTTGAACTGAAACAGGCATAGAGGACCTTTCTTTGGGAT  
GGTTTGGGCCATCATACACAGAAGGGATGGATCTTCTGTTGTTGCTCTGTGGTACGTGGAACAACCTCTTGTGATGAA  
TTCAGAGAGAGTGTGTTCCCTCGTACGTTTCTGTTGGAGTCAAAGGTCAGCCAAACCGTCTTCTCTGTTCTGACT  
TGTTCTTTGAAAATGCGAGGTCAAACCATGTTTTCGGTCCATCAGAGACGTAAGAGACAAGCTTTTGGTTCAGAGAGG  
TACTTCTTCCGCTTCTGTTGCTGCTCGAACCAAGACCTTTGAAATACTGACTTTGAGGTTTTTGTGCTCTGGGTTCTT  
TACGAGCCATTTCTGAAATTTTGTGGTTGAAAAGAACCACTTCTTCTTTCGCAAAAAGCCTTGAGAAATGGGAGTTT  
TCAGAGACTGAACGAACCCGTTCTGCAAAAAGTTCCGGATGGTGTGTTGTAAGAAAATTTGAGCACAAGTCCCTCGATGTGA  
CTTCCGTTCCATGTTCTGCGTCGCACATCAGATAGACCTTTCCATATCTCAGAGTTTTTGGAGGTCCTTGGACAGACCGG  
AACATTTCTCAAAGTTCGAGCTTTGTTCTTTCCAATCATCTTTTGGCTTGGCTTTCGTTGTTGAGCCTTTGAGCACCTTCCCT  
TACAGGCAAAAGCGCGTACTTTTCCCTTATCTTTGAGAGAAAGTGAAGCCAGAGACAGGTTTTTGTGAAATCTCCC  
TCTGTGAGAAATGAGAAATGCACTCTGCGTCTCTGCTGTTCCGGCGAGCTGAGCGTCTGACCTTTGTAAGGTCGAGTTG  
CAGCTTCTTTGTTTCTTCTGCTCTTGGGATCGAGACGAGAGGCAATTTTGAACAAAAGCCCCACTTCACTCAACTTTT  
TTGTTTGTCTCGAGAAATTTTCACTGCTTTTGAACGGCGACGCAAGTCTGCTTGTGCTGGCTTGTAACTCTGCG  
TTGTCCAAGTCAAAAACAGAAAAGATGAAAGAAAGCACTCGAGTCTTCTGCTGCTGCTTGGCTTCCCATCTGCTT  
TTGCTTTGGCTTGAACGCTTGAAGGGGCATTAGAACAGCACTTCCATGCAATGACATGACCCCAAGTGAACACTT

CAAGACCGTTACAGAAAGAAAGGCTTGTTCCTGGCTCGAATCAGCAGAAACTTCTTGGAGATTCTTTTCGAGAAGAGCG  
AATCTCGAGTCGGGAGACGAAAGCAGAGGACGTTTGGATTTTCCAGAGAAAAGAGCCACATAATCTGAGAGGGATGG  
GAAGGAGAAATTTCTCTCCGTTGAAAGAAGCAGAGAGTCTGTACCAGCGACGCATCTCTCAACGCTTTTGGAACTG  
AAAGAAGTGGCTCGGTCCATCCATCAAGTCCAAATCTCGCAAAGTCTGGGAGAAAACGAACTCCGTCACCCCTTTTTC  
TTTGTGCACCTTTCAATGACTGGAGGACTCCTCCTGTGAGATTGTGAAAACTTGTCTCAAAGATTCTCTGGTTCTC  
TGGGTCAAACAGCGGAACAATAAAGTGTCTGGAGAAAATGGACGTGAGCTTCGCTCCAGTCCGTTCCCTCCAGAAGTCT  
TTGAACTTCTCGTCTGTAGTTTGTGATGCTTTGAGTAGCCAAAGAAGAGCTCTGCGGGTACAGAAGAGAAGAC  
GAGGTGTTTTCCGAGTTCGTGCTGTAGCTGTACTCTTTCTTCTCGACAGGAATGTGCGCTCCATCGTCCACACAGTGC  
GTAACCCGTAATCCCTGTCTATGGAACGTTGACAGAGCGCATCGAACCCAGAAAACGGAAGAGCGAAAATAGTTGTCCA  
CAGCATGTCTCACAATCTCGTAAAAATGCGCTCAAGACCTTCTGGAACCTTAGGGTCCGAATGTCATCAACTTTTTCT  
TCCTTGACCAGCACCATCTCTGTTGGGGAAGATGCGGATGGAACCGAGGAAAAGTTCCGGACGATGGAGGGCGAATTG  
GAAGTCTGTGAGTCTGCGTCCCGAGTCCATGAAGATATTTTATTTGAGATGTTTGTCTTTGAAAAATTTTTGAAGAAAAT  
ATTTGGTTTTGGTTCAGCCATCAATACGGGATAATCGGTCCAGAAACTTCTGTTCGAAATGACGAGTTCCTCCAAAGTC  
TGGGAAAAGTAGACATCAGGGATGTTCTCATACTTTCTGGTACAAGGACTGTTATCGTTTTGAGAAAATCTTCGCTTAT  
CCACCATCCGTGAATATCAGGAAAATTTGCCAAAGTTCGTTCCAGGACATCGAATAAACAGTTTTGGTTGTTCAAATAA  
ACAATGAAATTTCTCCTCTCTCAAGAGATTTCTGCTGCTTTTGTGTTGGTGTCTCCCGTCCCTTTGATAAGAAAGA  
GGAGCAACAATTTCCCTGCTTCAAAGATGGGCAAGGAAGTTCTCTCGACGCAAGAGGTCGCTTCTACGATGAAGGACATTT  
CTCCGACTTCTATCCCTTCTTTCAAGAGGACGAGAGAGGAGTGTTCCTTCCATTCCAAGGAAACGTCGAGCATCATCAA  
GGGCAATCATCAACATGGACCTTTTCGGAAGGAGGTGCTCAACGTTGCGAGGTTGTGAGACATCCATTCAGGGGAGA  
AGGTGTCGATGCGCTTCAAAGATGGGCAAGGAAGTTCTCTCGACGCAAGAGGTCGCTTCTACGATGAAGGACATTT  
GTCTCGAGGAAAAGGAGAGTCTATTCGTTAGACAGCAGTGTGGGATAATTTGAGAGAATCTGTCCCTTGTTCATAAAT  
ATTTTTTGTGAAATAAATAATATGTTTGGCTTCTCGAGGAAAAGAACGTTGTCAGTCTCTGCTTTGTTTTCCAGAGAA  
TCTCTGCGTTTTGAGTGAACAGCAGTGAAGACGCTGCTCCAGCAGCAAGAGGTCGCTTCTACGATGAAGGACATTT  
GTCTCGAGGAAAAGGAGAGTCTATTCGTTAGACAGCAGTGTGGGATAATTTGAGAGAATCTGTCCCTTGTTCATAAAT  
ATTTTTTGTGAAATAAATAATATGTTTGGCTTCTCGAGGAAAAGAACGTTGTCAGTCTCTGCTTTGTTTTCCAGAGAA  
TCTCTGCGTTTTGAGTGAACAGCAGTGAAGACGCTGCTCCAGCAGCAAGAGGTCGCTTCTACGATGAAGGACATTT  
TTGCTTCTTTCTGGATGGTCCAAAGGCCAGTTACGGCCCGTTTTGACAGTGTGTTGAAAAATGGGAGAACTCGAAAGAG  
CGACTTGTTCACCCGTTGAAAAAGACAGGGATGCATATCGACGGAAGAAAACAGGTCGTGTAATTTGGAAAATTTT  
GGACAGCAGAGGTTCAAAGAGGAGACTGTTTGGATGGAGGAATGAAGGTGTTTCAAGAGTACGAGCACGGGAAATTTTT  
AAGAGCAGAGTGGGAGAGTGTAAATATTTTGAACAAAATATTTTATTCGACAGTTTTTCCCTTTGAAAGTCCAGCAT  
TACAGTCTTTCCAGACGCATCTTTCATCGTCCGCACTCCATCCTCAAGTCCGTTTTTGTAGAAGGATGTGATTGTTGAGA  
CGAGTGCATCTCCTGTTTCTCGAATGGAAGAGCCAGTTTCTCTGGGTAACCTCTCCCTCAAGTTTCCCATTTGCGTAT  
GTTTTCTCAATGTCCTTCCGAAAGATTGCTTCTTCTCAACAAGAGAGTTTTGAAGGGAAGCAAAACAGACGAGATTGT  
TTCCTGCTCCTTGAACAGAGAAAAGGTCATGACGGAGCTCTGTCCCTTCCAAAGCAGAAAATGTTTTCTGAGAGTCT  
TTGTCACTCTTTCCGTGAAATTTCTTCCCTTTGCTGGGCCAATGTGGACGGTTCGGGAACCACACAAGTCGTCTGACCG  
TTCCTTCTATGAGAGTGAAGCAGTCTTCTGTACAAAACCTTTTCTCAAAGTTTTATCTTGTCTTTGATTCAAATA  
GAGAAATATTTCTTGTCTTCTTTAGACTGAAAGAGCAGAACTCTTTTATGAGTGAAGGCGCTATTCTGATGTGAAGG  
TCGCACATCAGAGAGAAAAGGTCATTTCCAGAGTGAAGTTTTTCCAGAGCAAAAAGTTTTGAAATTAATAA  
ATGGGCCAAAACATCCACTTTATTTCAAAATGTCTTTTTCGAACAGGTTTCCACAAAATAATCTTGTGCTGTTCTTTCC  
CGCATGATGAAACCGGTTCTCATCGACTGGAACCTCCATACAAAGGGAGATAGTCTGGAACGAAAGAACTAATGAGT  
TTGCTCATCCAAAGTATGCTCTTGGGATCAACATCGGAAATAAATCTTTGATGGAATCTGGCAGGACGGATACCGTTC  
TATCGACGAAAACAAAGGCTTACTTCTATCGGAAAATTTATGAAACAACGAAATTTCAACGTTGTCGAAAAGCAAGAAG  
AACGAAAATTTGTTACAAAAGTCCCGAAAATTCGAGGAATTCGCGAGTGTGACTGAGTCAGAAAAGAGGTCCTATT  
GACTTTTATGAGCTCAGCAGATCGCTCTATCCACCATCCCTTGGAAAAGCAAAAAGGACATTTTTAAGAGACTGCAATA  
TGGAAAGAGTTTTGTATCAAAAAGTCCCGAAAATTCGAGGAATTCGCGAGTGTGACTGAGTCAGAAAAGAGGTCCTATT  
CACTCCTGCCAAGTCTGTATTTTGTGCGATCAAGTCAAAGGAAGAGCTACATCATCGCGTTCGCTCGACTCGCGATG  
CTTATTTCCATTTCTCCGAGAGTTTTGGACCCCTCCGAATACATACCTCGAATCTGCAAAAAGTCTAGAGTGGTCCAA  
CGGGAAGGGGTACAACAAAACCTCTTGGGCACTCAAAGGAGGTTCTTCTTTTTGTCAGAGTTTTGTTCTAATGAAG  
AGAAGTGGACTATGAACAACCTCTTTTGGTGTATCTCGGACTTATATTTTCTCAACAGAAAGAGTCTGAGAAAACG  
GAAGATGAAGAAAAGAGTTTGAAGATCCTCGAGATGAAGAAGGAGATCTCAGAAATCTGGAGAAGCACAAAAGCAGG  
AGCCTATTTCAAGGACGATGATCAAGGAATTCAGTGAATTTGACGCGTCTGAATATATTTTCAAAATAAATAAT  
GTACGACAGAGGACAAGTTGTATCGCGATAAGAGGGCACATTTTATGAAGGAGACTAACACTGAAAATATTTTCCAAA  
TAAATCTCAAAGAGAAAGTTCAAAATCAGAAATTTTTTCAATGTCCTTTTCAAGTCTGTGCGGATGAAGGGAAACGG  
TCTCGTCCGTTCTCGTCCGCTCGTCTTCCAGTACAAAGAGGGAAGAGCTTGGTTCTGGATAAACTGCTGTCTGTGGAGA  
ACAAGGATTTGCAAGAGATGTTTGTCAAGTTGCTGGATGGAGTAAGCCAGGCAAAACACGAGGAGATTGTCGGTGTGAG  
CTCAAAGACAAAAGACTCAGTCTCGAATATTTTTGTGGAGACTCACCCTTCAACACGAAAAGCGAAATGGGCAGTATAG  
TGTGTGCGTTCTTTTCGCAAGTGCAAAAGGGTCTGGAGAAAATCTGCGAAGAACTCGAAAAGGCACTTGTACACCTGA  
CAGGAGAGCATGCGTCTGATGATTGAGGAGCGATGAAGAATCGGAGGAGAGCGAAAAGTGAAGAGTCAGAGGAAAAGGAT  
GTCGAGGAGACTCCGATATAGATATTTTATTCGAATAAATAATTCAGAAATTTGTTTGTCTCGTCAAGAGGGACAATCTCG  
ACAAACTATTTTCGAGACTCTTTTCAATCCACAAGTAAAATATTTTATCGAGAGGCGAGAGTGTCTTTGAAATTTCTTCT  
TTCACGATGGATTGGAACGACTACACCATCTATGTGACGCTTCTCGCAAGGGAGACGAGTGGAAATTCAAACTCTCGAC  
GAGCAAAAGCGAGAGGAGCATGTGCTGGGTGAAGCTCAGCAAAAAGATTTCTTGTACGGGTTTGGCTTTCCAAAAGGG  
GGAATGTCCGAGTCCGATGCTCAGATTAAGAATTTTTGGAGACTGTTACGATGTGCACATAAAGCCGGAATGAA  
AGGTGACACAAGCTCACTCAAGACATCCAAATTTTCGAGGCTGCCCTGACCCATTTCCCAAAGGACAGCAACAACGAT  
CAACGAGTTGCTGAAAGAAGCTCGAACGGAGAGGAACCGTCTTTTTGGTTTTTTCATGAGACGCAATGATGTCGTTTTA  
TAAGAGACGAGATAGTGACTCAAGGAAAACCTTGAAGTTTTCTGGCTCTGTATACTGTGGTTTTTCCGTCGCTCGAT  
GGTCCCTTTACATCGCAATCCGATTAAGAAGTCTGTTTGAAGGATGAGAGAGTCTGAGGAGGGAGAATACCCAAAGA  
CCCCAAGAGGAAAGTCTGACGATGAAAGTTTCAAGACTGATGATGAGGACGTTTTTTGAGTTTTGGAGGGTGGAA  
GAAGAAATTTTTATTCAGAAAATATTCAAAGTGTATGTTGTTGTTGTTGTTGTTGTTGTTGTTGTTGTTGTTGTTG  
GAAAGAAAATTTACTTGTGTTTTGAAAGTTCAAGGAGTCTCCTGAGTCTTTTACTTCTTCTTCTTCTTCTTCTTCT  
GAGAAATGTTTCTTCTTCTTCTTCTTCTTCTTCTTCTTCTTCTTCTTCTTCTTCTTCTTCTTCTTCTTCTTCTTCT  
ACTTTGCGTCTCTAGTTTTTCTCTGTTCTTCTCCGAAAAGTGCAGAGTAATCCTTTTGGGTCTTCTTCTCTGTT  
GTCAGGGACATAATATTAATAATATATATCGCAAAATATTTCTTCAACAATTTTTAGAGCGTTTTAAAGAAAAGAA



TTGTCGGGTAATGAGCTCCACTAAAGTTCATCAAACGCCGACAACTAGTTATTCAACTTTTTCTAGTTATACCCGTTTCT  
ATCCGAAAACTTTTTGTGAAGACCAGACATCGTGTCTCTGTGAAATTTCTGGTTCTTCAAAGGGAGACTTGAGAAAA  
CATTATGTCGGAAGCTTTCAAGCTCAAGTTGAACAAGAGACAAAGAAGAACGCGGTTCGTTTCGTTGGAATGGGAGAG  
GAAAGTGGGAGAATCAGAGAGACTGGGAGGTTCAAGCCAGCTCCTCGAGCATATCGGCTTGCCTCCGGAATATCTCA  
AAATAACTTTGGAAGAAAGGGTACACATTTTCAAACGGTCGGAATTTAGTCTCTTCGGACAACTTTGCTTTTGTTC  
CGAATTTTTCCGTTGTGATTTCAAAGGAGCCGAGAAAGAGAGGTCATTTTCGCTCTCTTAGACTTTCCGTTTTCCCAA  
CATAGCATCCAAACATTTTCTCGACACATCGTTCCGCCACCTCACAACAGACTTTCTTCTTTGACACCTTCCCAAAC  
AGAGCTTGGAAATTTGCTCTTCAGAACGACTTCTCTCGCATTCCTATCTCGAAGCCATCTCAGAGCTTTTTATTCT  
CTTCCCTTCGAGACGTTTCAAACCCAGAAGCTTCATCAACCTCTTGCATAAACGACCTTTTCAAATGTTAGATCTC  
CATGGAGCTTCTCTATCTCTGAATAGTTTGTCTCTTGATATTTTTCTCATCTGCCATTGTTCTAAGCCTCTCATCTTGT  
TGTTCCTTTGTTCTTCGAACGCCAATCTCTGATGAAGAACTGCTTCTCCAATCCCTTGAAGTATCCACAACTCGTA  
CGTGACATCACCTTGTTCACCTCGAAGCGATATGCCATCAGCCATTTCTTGATCTTGAAATTTGCTCTTTTGTCTTT  
CAGCAAGTGTGCAGAGTGTCAAACCTCTCGTTGTCTGTTTTCAGCGGAAGAAATTCCTCTGATCTTCTTCCGTT  
TCTATTTTTTTCATCCGATTTCTATTTTTTTCAGAAAGGCTCACAAGAACATTTTCGAAATTTGCTATAACTCCAAATGGCAA  
AAGTTTCGCGTGGTGAATTTCTGCACATTTCTTCTTTTGTCTCTACTTCTGCTTTGACAGACGAAAAAGTTTCAA  
CTGCTTCTTCATCTTCCAAAAAATATTCATTTCCCTTTTGTGTGAAACACTTCCACGAAAACTCTCAATGACAAGC  
TTCTCGCTCTGAGAAATAAAATCTGCTCAAACATCGCGAGACTCTGACGTTCCCGTAAGAATTTCTTCTTGATTTCCA  
ATTCGAGGACTTTCCGACCTTGTATACGCCCTTTTCCAAATAGCGTCTCTCAGCAGATAAAATTTTCCCTTATCCA  
TTACAAATGTCGCCTGTTCTCGAAACAAAAGGCCGTTTTCTTTGTTTTCTGGTTGTTTTAAGAAAGGTTATTTGAACAT  
ATATTTTTGAACGAGAATTTGGGAGAGTGAATGTATATAGATGACTCTCTGGTATATAACTCTGAACATTTTCGACA  
TCACAAAAATTTTTATCAAACAAAATTTATTTCTCAGATATCCAAATTTCTTCTTCAAAGACGAAACAGGGAGGAAC  
TTGTCTATCCATTCGGGCTGTGGAACGAATACTCCGTCTTCTGAAAATTCGTTCTTCTCACCCCTTGTCTTAAATCTCGA  
TATCAAGCGCCAGTACAACGTTTTGTTTCATGCTCGTCTTGCAAAAGAAACCCCAAACCTCTCTCAAACCTTATTTA  
TCCAAGCGATTTGGAGACTTTGGATAAATTCAGACAAAAGTCAAACCTCTTCTTCTTCAAACCTTCTTCTTCAAACCTTCTC  
TTCGCAACGGAACGCGCAAAGATTGCATTTCTCACTTCTTCCCAATGTCAAATCAGAGAAATCCGAGACCGTTCGAGCAA  
CTCCACGCAAGGTACACTTTTTCTATGTTTTCTTCTCTGAACGAAGGATTTCTCTCACCCAAAGACAAATATCTTCCCT  
CTCGAACTTCTCCGAATGATATTTCAAAGTCTTCTCTCACCTCGTTCCTCTCACAGAGGCGAAGCATCTGTTTTTGT  
AACTGTGTGAGAAATTTTGGATAAATTCAGACAAAAGTCAAACCTCTTCTTCTTCTTCAAACCTTCTTCTTCAAACCTTCTC  
AGAGTATCTTTGACAAGAGCGCTTTTCTTGAACGTTTGGCATCTCTCGAATTTATTTCTTGTGCTTGTCTTCCGCTA  
TAATTTTCAGAGACGAGGATTTTGGGCATTTCCACCTCGTCTGACGACAGAGATTTCTTCTCATCTCTCTGAGATGCAC  
TCGAGTTCCCTTTGTTACAGAAAATGCTTTCTCTTCAAATGTCTTCTTGGTGTTCAGATAATCAAAGAGTTGCTC  
TTTTGAACCTCTTTTGGAGAGATTTGTTTGAAGGGCGTTTTGGAGGTACTGGGACGCGGAAGTTCGTTCTTTTCAAAGTTCAT  
CGGTCAACACTCGAAGACGAACGCCGCGAGGGATGACAACTTCTCTTCTTCTTCTTGTCTGTATTTTCAGGCACCTT  
TTTCCAGAGCAAAGTCCATCTCGATGTTGCGCAACGAGACTCAAGAGAACACGGAACGTTTGGCCTTCTCGAGTTGAC  
AACCCGCAAAAGTTTGAAGATGATGTTCCGAACCGGAAATATCATCTGAACACTGTGACGACGTTGACGAGAGAC  
TCGTGAAGTAGAAGAACTCTATCAAATGTGGGCTTCTGAAGTCAACAGCGGTGATACAACCTCGTGAAGCGGATG  
ACGGGTAGTTTTTCAAACGCTCGTGTCCACAGGTTCTCCATTCATCGTGTCTGCCGTGTACCTGAGAAATTTTCTTCT  
CATTTCCCGTTCTTCTTCGAGCATGTCAAAAGGATATGAAGTTTTCTTTTCGCTCGTTCATCGCCAGAACAAATGTTTTCTC  
CATCTTTCAGGACCTCTGAGCCGCAAAACAAAGCTTCTCACGCTAGGAAGGATGTACATGTTTTTTTCTACGTTGGCT  
TTGTGGTCTTTTACCACCATGACCTTCTTCCAAAGTCTCTCAAAGTTGACAGAAAGATTGAGTCAAGAACGCGT  
CAGCACAATCACAAGCTCCGCTTCTGGACAAGTTCTCTCAGAACTTCAAACATTTCCATGGGTTCCGACACACGAGACA  
TCATCTGATTTATGGTCTCTGAGAACTCATCGATCAGCAGCAGAAATAATGGCCAGACATCTCAGGATAGAGTTCGATA  
GCACACCAAATTTTTTGAACCCAGGATTTTATAGTCTTTGAAATCTGAATAAAGCGAGAACCCAGCATTTCTTCTCATCGT  
TAGCTCTCTGTTGAGCGACTTCTGTACGAAAGGATGACTTGTGATGTGATTTCTCTTTGAGAACTTTGAGACAAAT  
TGGTCTTCTCTGTGCGGAGATTGACTGGATAGCGAGCGCATTTTTCTTCTGAAATTTGACCAATAACAACTCTTTT  
GAAGTTACCGTTTCGTCGCTTTTGGTAGAAACATCTCCCTTTGAGAGTTTTAAATTTCTGGCTTAATCCAGCCAATCTT  
TTCCAGCTCTCGTCTGATTTTTTGAAGAGACTCGGATTTCTCTCGGTTGCTCCTCACGAAAGTTTCTCTCATCGTGGCT  
GAGACACAGGGTGTGTTGACGACAGCCAATGAAGCGTTTCTTCTATCCATTTGTCAAATCCGTTTTCGTCATATCCC  
TCAGTCTCCATCGAGAATTTCTCAAGAGTTCTTTGCAACTTCTTCTATCTTTTGTGATACCAAAGATAAAAAAGGCAAC  
GTCTCGCCATTCGTTATAATCTTCTCTTCTTCTCAGAGAGACCAGACAACAGGAATCGGAGAGGTTCCATATCGCCTT  
GCACGACAAAGGCTTTTTCCACTTTTTGAGACTGTTTTCTGATGGTTGGTGGCTTTGGACCAATGTTGCCCCACTTGGAT  
GAATGGCAGTGCAAAAGAGCTTTTGAAGATATTTCTGCTCCCAACCCATCAAAGAGTTCAAAGTATCTTGTCTCTCC  
GTATTTTCGCTGAGCCGAGGACCCCTCATCTGCCTGTTCTTTGTATAGATGCTGAAGTCCAGCATTTTGAAGAACAGGTCGT  
ACTCTGGTCTCTCTCCAACCAAGAGCGAAACATCGACGAAACCCCTTCAGCGCTCCGACATCTTGTGATTTCTTATTC  
ACAAAAATTTGAGGCTGAGTTTATATTTTTCTCCCTTTTGACCAGAGCTCTGAGAGGAACAATTTAAGCTTCCCTTC  
CGTTCCAAACTCTTTTCTCGCTTGCAAAACAGCTTGTAGACCTGTTTTTCAGAGACTTGACCTTTCGAGAAATCCAAAG  
TTTCCAGGTCGTAGATTTCTTGAAGGTTTGGCCTCCAACATCATCTCTCGAAACCATTTCTTCTCTTGGAACTGTC  
TCGTAAAACTCTCGAATTTTGAATGCTCTCGAATGGCGGTACATCGGCATCATCGTTTTCTCATGGGTCTGTGACAAA  
GCACATGTCAAAGCCCTTTCTCATCCCATAGCGAAGAGCGAACCACTGCGCTCCCTTCCCTTCGAGATATCTCTCCAG  
CGGAAATTTCTGTTCTTTCTGCTCTCTTGAAGGTTCTTGAAGCTCGTAGAAAAAGACGACATTCATCTCTCGATGCCAT  
TCCACGCGAAGATATGGAGGGATAGACCACAATATCTCAAATCTCTTCTTCTTCTTGAAGAAGCTCTCTGCTCCACC  
CTTTGAAACCAAGCAAAGAACCGGACGGATCATGATCTTGTGAGACTTTGTTACGAGTTTTCTCCATTTTTACGATGCT  
CTTGAAGATGTCAGTGTGTTCTATGGAATAACCAAGTTCTCTCTGAAGTTGCACATCGGGCATTCAGAAGCTCCGCTC  
CGAACTTTTTCTGCTCTGCTCTATTGTGAAAGAAAGGGTGTATTTTTTGGGATAACTAGAAAAAGCGTTTGTGTTAGT  
TGCCGTTGAGTTTTGTCTCTTCCAGGGAGGAACTCATACACGCAACATATTTTTTCTTAAATTTTTCTAATGAAT  
CATTAGAAAATAAATCACAAGAAAGGAACTTTGTAAGGTAAGAAACAGTATGTCGTTGGTGCAGCAAAAGAAAGAACCCAG  
AAGGATTTATTCGAGAGAAATAGAGAAAAAAGAGGAAAGACCAGAGAACAAAGCCAAAGCATGTTACTATCGCAACAG  
AGAGAAAGCTCTCGCTCAAGGTTGAAGTCAACAAGCGAAAAAGGAAAGAGAGAAAAAGAACTTCTCTTATCCAAAC  
AGCAACAAAGAGCTCGAACCTCCGTTCTGCTCTCAGTGAAGCGAACCAAGTGCATTTTCTCAAATAAAAATTTTTT  
GTTTGTAAAAATATTTCAAATCGTGGTCTCTTTTCCATTTATTTCTTGTATACATTTTGGCCATGCATAACTTTTTT  
AAAAATAGAGAACTCGCTCTTCTGCTCTCGTGAAGACATAGACATCAAACAGAAAGAAATTTGTGCGAACTTCAGGCAT

CACAAAGGAAGAGGGAAAGGATTGGAGTTACACCAAAGTGGTCATCTCCCAAACGGAAACAAGTCACGGCACTTATTCCA  
AAGAGGGGAAAAAGAACGCTGGGAAAAGGAAAAGAGACTAAACTACAAAATGGGAAAGCTTACCGGTTCCCTCTATGGT  
TCTTTCCGTAACGCCTTTTTCTTTGAATGCTCTGGAAATTTCAAGAAAGCGCTCCCTGTGGGAAAGTCCGTTTTTGTGG  
AGAAATTTATGAGGATCAAGAAAGAAAGAGTTTCTTTCTTTTCGAGAACCGTATGCCGACGTTTTTTGAAGGCGTCAGAA  
ACTTTCCCAATAATTTGGGAAGGGAAAACCTTTCTTTGGACGGAAAAGTATACAAGAACATCTCCTTCTCTGAACAAAA  
TTTTTGTCTTTGAGTCTGAAACACCTCTCTCTGTGCGGATTTTGGAAATGTCCGTGCGCACATTTCTGAGAAAGTATCAAC  
AAAAGTTTATGGGACAAACGAACAAGGAAAGATGAAGAGAATTACATCCCTGTGTTTCCCAGTAATATTTTTACGAGT  
AAAAATATTACTACAAGTCTCTTTCTTTGGGAAGAGGCGCGAAGAACTCTGTCTGCGTGTCTGTTGCCAAGACGCAACG  
TTTACTGTATTTGGCGGCTCGATGGACCCATGCCCTCTTTTGTGTACGCTCTTCCGGAAGAGCGAAAGGGACGAGCTCT  
CTTTTTTCGAGGAATTTTTCAGTGTCCATGTCCAGATGAAAACCTCCAAAATGTCTCTCTGTTTTTCGCTTCGAAAGGAC  
GAATGGAGCGACATTTTTCTATCAACATATTTTTATGGGTAAAATATTTCTGTCAAAGGTAGACTTTGGAAACTTCTCT  
TTCTTTGGGAAAGGCAACCTCACAAACAGTCAAAAATCCCTGTGATATCTTCACTTGAGCAAAAATGTCTCTCTCTCCCT  
TTTTGTACACGCTCATCGTCTCAAGGACACATCGACCTCCCTCTGTGTGACAGACAAGATATTTCTTTGGCAAAAAT  
TCCCCTTCAAGCTTCCCATTA AAAAATGTTCCAAAAGACTCGAGTTCATGTGCTTTCTGTTTTCTCCACGATTTTGAATGG  
ACCGTGTCTGGTGTGGTACCAGCAAGTACGAAAACGTCGCGGTTTTCTCCACAGCGACGCGTTTTGCCATTCAAGGTCT  
CTTCCACCTTTCTGTTTTCTTTCTTTCTACAAGTCTCTGCTCAACAACAAAATAGAGCGCGGACCATTCCTTTGGTTCC  
AAAAACGTTTTCCATGTTTTCCCTCTCTGTTGCACTCGACAGTGTCAAGTTCCTTTTGCATATGAGAACTTCTTGTCCAAA  
TCGTCATCCAAGTTTCTCCCTCGAATGCGATTGTCTCTCCGTTGAAGGCAATTCCTTTCACTTCGACGCGGATGGGACCG  
ACATCGCCATTTTTCTGTGTGATGATGTTCAAGGAAAACGTTCCATGAACAAGTTTGTCTCCCTTCGAGAAGTGGACCA  
TCCCTTGTAGTTGGAGACAATCTTAGTTCCTGGTCTGCTGGACCCATTTTTTGTAGTACAAATCTCTCTCTCTCTA  
TGTTTGTTTGCATCTCAGTTCGGACAGAGAGTTCCAATGAGAGCCACCTCTTCTTTGGAGAAAATTTGTCTCGTCTCAA  
GGTGAATATTTTTACTCATAAAAAATTTTTGATGCGCTTCCGTCGCGTACACCACAGAGTTTTGAAGTCTCCATTGG  
TGTCTGTGACGTTCCAAGGGCCGTCGAGAAACCTCTTTTGAAGAGCTGAGAAATGTGCAATGCAAGTACAATGCGCT  
GCGCGGCTTCTCAGCAGCTTTTTCTGGCTCATTTCTCCCTCAAGTTTTCCATTGACAAAAGTTCCGCAAAAGTTCTGTTTT  
GTGCTCAGTCTTTCTTGTACAAGTCTACACGAAAAATACCCAAAACAAATGTGCTGGTTTTTGTGGCGACAACAGATT  
CGAAAGGACCATGACGGATCTTTGTTCCCTTTGAAAAGGAGTAAAGTTCTTCCGTGACTCTTTTCGACCTTCTCTGTGAT  
TTTGACCCCTTCCGCTGCTGCGGTCTGTTGAGTTTCAACGACAACTGTTTTTTCTTTGGTCTCTGTTCCAG  
TTCCGGAACAAGAGACGATTTCTGTAACCTGCGCATTTCTCTGGTTCGAGGAAGCACTCCATCTGTGATAAAAATTTCTT  
GAAAAGTTTTATGTGTCCAAACGATTGTTCCACAAAATCACGTCTTTTGAAGAAATGTGAGAGACACTTGGAAACGTT  
CTTTCTTGTTTTTCTGCTCTTTCTCCGTATAAACGCAATACATTTATGGACTCTTTCTTCAAAAATCCTGATGTTGC  
TGCCCCATGTCGTAAGTGAATCCGCTCTTCTCGCCGTAACAACCTCCGTCAAACGTAACCAAAATTTCTGTACACT  
CTCCGAAACAGGCTCTCAGAAACGCCAAAGTAAAGAGTTTTTTCCAAAAGAAAAGGGTCCACCAAAACCTTTCCGATGAT  
GTCCCTGAGTCTGTCTTTAGCTCCGAAAAGGCTTTTCTATCTCCGTGAGCCACAATCTGCCGTACAGAAAGAGTATC  
CACAAAGTCTTTTTTGCATTTACCTGTTCTTTACCCAGCAAAACGTTTCGATAACATCTTTCAAATTCGACCTGTTTTG  
CCGTTCCGATGCGAGCTCGTACTGACTTGACCTTCTGGGAATTTCACTGTTTGAATTTCAAGCTTTTCTCTCTTTGTA  
TGTTTTGTAGTTGCTCTACGGAAAATATTTCTCTCAATTTTTTACAAAAGAACTCTTCTCTTTTCTTTGCTTTGTA  
GTTTCCGTCGATGTACCTTCTACGAGTTCGTATCAGTCTGTGTACACATCTGGGCCATTTCTTTTCTTCTGCGGAGT  
TCCAGCACAGAGAAGGAGGTCATGTCGATTTCCCTTCCGGAAGGAAATGGCGCTCTTTCGCTTTGAGGAGAAC  
GAATGTGTTACACCTTCTCGAACGAGTTCGATTTGCTGACGTTTCCGTTACCTCAGAAATTTGAGATGCGAGATCGCTGTGCTGCG  
CAATGTCATCAGAGCGCAACGAAACGAAAGGATGTCATCGTCAAAGAGAACTCTTCCATCTATGAAACTTTTTGAACA  
AAAAGTTTCAATGTTGCTTTGATATTTAAAATCCGAGGTACCTCTATACGCGAGTGAATGGTTGGCGAGCACTGTGAG  
CAAGTTGTCTGTGAACGTTAGTTTGTGCGCAGCTGTTTATAGAAAAGCGTCTTGTCCAAATCCCAAAATCTCTGACGCGA  
TCGAAGGGGAAAGTTTCAGGAACGATATCTTCAGATTTGCGTACCTCAGAAATTTGAGATGCGAGATCGCTGTGCTGCG  
CTTGGGAGAGACATCTGGGAGCAGCAAAAGTGCACGATTTCTTGTAGATGAGAGTCCAAGGAAAATCTAAAATGGCGAG  
CTGGGCGCACCCCCACCCAAACTGTATCCTGTGACGTACAGGTCTCCAGGATTTGACGTTGTCAGGCTAATAAGCTGTT  
GCTGGATGCTCGATAGGCATCGTAAAATCCCTGATGGACAGAAAGGCCAGCGCTCGGCACGCGAAGTTTCTTTGGTTCC  
ACCTGGTATAAGTCAAGTCTGTTATCCAACTCTCGCAGTTCGTTCCGTTCCGCAAAAGGCGATGACAGAGAGCTTCTTTGA  
GCTGCTATGGAGAAAAGAGGCGTAAGTTTCAAGCTCTTGGCAAGTGTGAAATTCGGCTTTATTTCTGGACAACGTCAA  
AATCTGGAGGGGGAGGACTCTTTGTGTGTCGAGTTTGGCTGAAAGTGGCGTTCCAAAGAAATTTGCAACAAAAACCTCGAA  
AGGTCCGGCTCTGTTGGTTGTCCAGTCCACGGAAGGTTAGGTAAGAAAGTCTGGTTCTCTGCCCGTAAAGTTTCCC  
CTTTAGTTGAGGAGTTTTTCTCTCTCTCTCCATCAAAGAAGGCGAACCAACCAAAATATCGCAAAGAGAAATAAATC  
CGAGAGTACGAAAATATGAAGTTTTCATCGTTACACTAAGTCTCGGAACAATATTTGTTTTCTTAAAACAAATATGGG  
TAAGATGTCCAAAGAAAGGAAATGGCTCCCTCTTTTGCACTTTGAGTACGAAAATATCTGGATTTGTCTTTGCAAGAAAG  
AAGGAGCTTGTCAAGAACTTGTTCGTATCTCAGAGACGACAAATCCAGAACACAAAGACGACATCTCAAGTTTTTTTCCCT  
TGGTTGGAAGAGGAGAGACAAAGAACTTTTTCTCGAGACCTTCCGTTGAGTCTCTTCCAAGGACCGGTTATTTGGCT  
GCAAGTGTTTGGAGACTGCGTCTTTTGTGTCTGAAAACAAAAGACAAAGAAAGTCTGCGAGATTTGCTTTTCCAAGC  
CGATGGAATTTTCTCTCGAAGGAGAAAGATACGAAAATGGGAGTTTCTCTAGAAAATATTTTTTGTGGATAAAAATA  
TACCTTTTTCTTTGGAAGAACTTTTCTGTTCAAGTACACAGCCTTTTTTGGAGTTTTTCTGGGAAAGCGCACAGGAAA  
AGGGAACGACAATCTCGAACAAATCTCCGCAACCCCTTCCCGTAAACTCTAGGAAGAGAAAATTTCTTCCGACTTTT  
CTCATCAAGTGTGTTGTGGAATCCCGTCTTTTCTGTAATATGCTCGTTTGAAGCCGACGAGGAGCGGCGCTTCTGTT  
CGCTTTTTCTGTGCGCACCTTTCTGTAGGGATATCCCACTTTTCGAGGAAAGAAACGTCGCTCTTCTTTGTATAGACTC  
GGAAGGAAGTCCCTTCTCTTTATTTTACATGTGATGCAATCCATCGACATGTGAAATGTGGAACGTCGCTCTTTCT  
TTTTTTTTGAGCTCGAGCCATTGAGTTTTCTTTCTCAAAGACCCAGAAATGTGAGAGAGTTTACCTCGTTTGTGAGTCT  
CTTACGCAAAACTTTCCGTGGGAAATCCCGTCTCGATAAGAAAGCGTGAACCAGTGAACGACACCGTTCTTTTTTTCT  
TTTTGTATGTTTTTCCGTGCTTGACATCTCCAGGAAGAACTTTTCTTTTACGAGATATTTCTTCAACCTTGTTTCTCT  
TGTTTTTATTTTTTGTGGTCAAATGCTGCTTTTTCAAAGGCAAAACGCCCCCTTCCGTTGGCAAAAGAGAGACGAGTTCCCT  
CTTCTCAAAGAGCTCTCCATTCGAAAAGAGGACAACTTTTGTCTGTGAGAAATCTTTTTTGTGCTAGAAATATTT  
TTATTCAAAAAATATTTGACAAAAGTTTTCTCTCTCTTTACGCGCAGACGCCAAAAGCAGAAGTTGGCGCATCGAGAC  
ATTTCTGCCACCGCGAGTCTGAGTCTGTGGTCAATTGACCCGCTTCCGCAATCTGCGAGCCGGAATCCAAAAG  
ACTTTGTTTGGCGACTTGCATCGACAAGGCTCTTGGTACCCTCCAGAAAATCCCTCATTGACAGACAGGGTTTGAAGG  
AGTGTACGGATTCCGAGGTTGAGTCTCGACATTTCACTTGGTTATAATCTTGGGCATAACAGTGCATGCGCTCCAAAC

ACTTTCCTTTCTCGATGCAGTAAGCCCTTCTTGATACCAGCGCATCCGAGAGTCTTCTGGACATTGACAGGTTCCGGTG  
AGAGGATTCATTCCGAAAGTGTCTTGACATTTACAGGTTTTGTTGGCACACTGAGAGAAACTTCCGCATTGGTAGTCGAA  
ACTGCATTGCTTTTTCGCACAACTGCCACCGCTCCCGATGAATCCGTCATTGCACCTTGACAGCTCCAAAGGGGAGTTTTAA  
GGCTCGGAAAGTTACGTCGCAATGGGCGTTGTTGAAGCGCAAGAGCTGCAATTCGGGAGACACTTGTCCATGCAAGTC  
ATCGAGTCTTCCCGTGTGGGGCAATGGTACGCGAGGTCGATGTAAGAGTTGAAAAGGTGCAAACTACGACATCTGAA  
GGTGTCTGAGCTGTAGGGGAATGGACAAGGAGAGTTTTCTCGAGTCGATGTAATCCACGCACTTTGGACAGATTGCTACT  
GCTGAAGAGGTCAGTGCACGTCGCCATAATTCCTTGACAGATGTCGAACGTTGGTCTCTGCTTCTGTTTTCAAGATT  
TGTTCTGCGCTTTGAGTTGATGACATAGTCTGAAATGATGGTCAAACCTGCAAGTTTGAACAGGATGACTCTTGT  
TCTCGTTCCGAGATGAGCAATGTCGTAATTTCCGCGTTCAGTTGAGTTGACCTTTACGATGCCTCTTGGTAAACT  
CTGCCATGTCGGTCCGTCCTTCCAGGTCGTTTCCATCCAGATAATTTCCGAGATACGTTGGAGGCACCATCCAGGA  
AAGAGAGGGATAGAACGGCAAGTACTCACTCGCTATGAGCGCAGTGTAAAGTCTCCGATGCCTCTTATCGTGTAGCT  
TACGTTAGGGTCGTAATATTTCCGACGCTTCCAACGCCATCGTCAGGTTCCGTTGCCTGAGTGCAGAGACGTTAGTCA  
TGACCTTTGCTCTGCTGTTTCCAGAGTTTCGACAGGACGTCGCAAGAGAGCGAGCAAGTGAATGTGTCGACGCAAGA  
CAAATCAGGAGCCAAGAAGTGAGATTCTTGCCTCTATTACTTGCTTCACTAAAAATATTTTATGGTCTTGAATATTT  
TTCTTCTGTTTGCATCCAAAGAAAAATAGAAAGTGAAGCTCTTCCGGAAGCGCATACGTTCCAAACGAAACAGAACTTT  
CATGACAGAACTTCAAAATATTTTGTCAAAATATTTTATGACCAACCAAGAAATCTGTGCTCCGTCGAAACCGG  
TCGTACAAAGAACCGAGGAGCAATGTCGTAATTTCCGCGTTCAGAAAGTTCAAAAATCCAGCTTCCATGCTCTCCG  
CGCAGAACTAAAAGCGGAAGCAAGACTTTCAGAAACCCAGAGAAGAGACTCGAGAGCGCTTCTCTGTTTTTTCTGCGA  
CTTGTGCGGAGCAGTTCCGACCTCTGAAATCCAGGAACGAGCGACTTTGCAAAAGTCCGTCGACTCCACCATCGTCGCA  
AACTTGCAGAACTCTGAAAGATAGATGGGTCAAAACAGCGCCAAAAACATCAAACAGAGTCTGAAATTTCTGTCT  
GTCCGAGCGCTTCTCCGTCAAAAGATTGCGGTAGTACCAAGACTGTTGTAATCTTTTTTGGCACTCAGAGTACGCCATT  
TCAGCGTTGAAATTCCTCAGCTCCAAACAGAGCGTCTGTTCAAACTCTTTTGAACCCGGGACAGAAAGCGCATCGTAC  
GTTTTGAAAGAAATCTCATGTTTTGTTTTCTCTGAGAAAAGAGTCTTTCAAAATTTCTGACAAAGTTTTCTCATCTTTG  
TTTTGTAAGTTTGGGAAATGTCACAGTGCAGTACTTTGAGTTTGGTGTGTTGCTTCTGCTTCTGCTTTTTCTGAATGT  
CTGCGCTTTGCATGCAAGTGGACCCAGGATTTGAAGCGCATTGTAATCTCGATGAACAAAAGAATCGCTCTTGTGACATCG  
TCGGTGCCTGTCAGCTTGTGCCACTTAGCGTACGACAGGGGAAGTGTGCAAAACCCAGACACGAAAGAGAGAGG  
AGCTTCCACAAAAATCCGACCAAGGATTTGGCGGACGCGACAGAGCGGATATGAGATTCGGCGCTTGTCTGGACGA  
ACTTGTAAAATTTCCGAAAGAGAGAGTCAAGAAAACAGCGTCTGATTTCTGTTTCTGCTTCTCCGTTTGCATCGATC  
GAAATCTCTGGAAGCGTCCAGTCTGACTCTGACGTTTATAGCAAAACGAGCGCAGCTTTGTGAGTTGAAGTTTGT  
AAAAAGTTGTTCCGCTCTTGTCTCTTGTCTTGTCTCAAACCGAAGAGCGTCAAGAAAGGAGAGTTGCTCTGCTTCTG  
AAGCGATAGAGTCAATGTTTGGGAATAAGTCAAGGACAAAAGGACGTCGAAATTTGTCCAACTTTGAAGAAGCGGAG  
CGTTTCGAAACAAAAGCAGAGAGTTGGGTTTTAGAACTCGCCTTGTGCGTTGAGAGTTTGAAGAAAAGAGCTTGTCTG  
TTGTTGAACCTGAAGTCCGCTTCTGTTGCAAGAACTCTGTTGTTTTCGCAATACAGAGCTTCTCATCTTTTGGTTG  
CTTCTCCAAAATTTGAGAACTTCTGTCCTTGTGTTTCTGAAAGAGTTTCGACCTTTTCGAACTGGATGACAGGTTTTG  
GCAAGTCTGAAATTTTGAAGCAAGAACTCCCTTTGATGTTCTATCAAGTTTCCAAATAGTTTTCCACGCCCTGTG  
CAGCTCAGAGAGAAGAGCTCTCTGTTTTTTCGAGGATGCGAATCTGCGAGTCTCGAAGAGAAGCAAAAAGTTTTGAAATTT  
CTAATATTTTTTGGGAGAGTTGGTCTCTAACGAGTTTTGCGTTCGAGTCTGGATTTTGAATGGAGCTGAAAGGACGGCG  
TCCGCTCTTCCAAAGAGACAGAAGTGCATCGATGCTTTCGAGCTTCTGCTTCTCATCGTTTCTGTAATCTCTCTGCGTCTG  
CTTCCGAACCAAGAAATTTCTGTAATCTTGTGTTTGAATACTTTTGGATGTTCTTCTGCTTTTTTTCGTAAGAAAG  
TGTCTTGTCTGAAACATGGCGTCTGTATATCCGCTTTTTGACGCTCTCTCTAAAATCCCTCTTCTCTGCGCTGAATTTG  
AGCGAAGCGTTCAGTGCCTCTGAGAGTCTATCTTTTTTCCAGAGAGCTCAAAGATGCTCCAAGTTCCAGGATGTTTGT  
GGTTTGAAGTTTCTTTGGTTGGAGTTTCCACTGTGATGTCAAATCCATCCACAGATAAAAAGGGTGAAGAGAGGACCTGTT  
TTTTCTGTCATCAAAACCTGAACTGAACTTCTGGAAGTGTAGGATATTTTTGAAGATGTTAGGATAATTTTTGAGG  
GACAGCGAGTTTTTTTATCCAAAGCCACGCGAACCAAAAGGGTAGCGCTCTGTTTTCCAGAGCGCTCAACCCGTACTGCG  
CAACAGCTCTGGAGTGAACCATTTGTTTTGCGAAAGAGAGCAGAGTTCGAGAGAGGTCAGTCCAGTTTTTCGTAATCGCA  
GAGAAAAACAGAGAAACAGCAGAAAGGGAGCCGCTCGTGTGTCGTTCAAAAGACTCGAGATTTTTTCCGGTGTATGAA  
TTGGAACATGTCGAAACCCAGAAATTTGAGAACGTACTGGGAACAAGCCAAAACAGCCAAAAGACCGAACCAATGAATATT  
TGTACTCAACGCAAGCTTTGCGGAGCGGTGGCGATTTGAGACAGCTGCTTTCGATCGCAGACATTATTTCCGTTGTTG  
TGTTTTTCTGTTGCTTCAAAACCCACGAAAGTCTTGTGTTTTGTTGTAACTTTTCGCTGAGCGTTTTCAAGCTCCCTTT  
GTATTCGAGATTGTTCTTGGAGGTTTGGTACGCCATCTCTGCAACAAGTCTCCAGTGTCTTGGTATTTTATCCAAAAAT  
CTCTGGCATTGTTGCGAGGTCGGTGACAGCAGAGACAGAGTCTCTGAGACGATGGTGCAAAAAGGTCCAAACCTCCC  
TGTCCACAGAAAGGGAAGTTGCAAACTTCTGTATACGAAAGGGCTCCATTCATCAGTTCGAGAGAAGCTGAAATTC  
GTCTTTCGTACGTTTCGAGACTCTGCAAAAAGAAAGTCTCACATCGTACCTTGAATGACTTGGTTCCAGCCAGAAA  
CAACGAGGCCCTGAGACGCGGAGGAAACAATAAACTTGAATTTTGAAGCAGCCAAATCCGAGATTGTTGGAGTCTT  
TCGACCCATGTTTTCGGGAGGAATCTCCCAACAACCTTGAAGCAAAAATCTGGGTCAGAGACGAACAGAGCGTATCCAAG  
ACCTGTGTTGGCTGCTGCAAGGTCAAACAAAATTCCTTTCTTTCGACGAGCGCCCTTTTGAAGCCGACTCTTCTCTGTT  
GTTCTAACCAAGAAAATACTGTTGATGATGCTGAGAATACTGGAACAATTCAGAAAATTTGCTGACTTCTGGA  
CGGTTAAACTCTCTCAAAATTTGCATCTTTGCCCTCGAAGAGCTCGAAGCACTTTGGCTGAAACAAGCTCTCAATGTTTT  
TGTTGCCATCATTCTGCCGATGGAGACAACAGTCTCGACTCGTTCAGAACGATTTTTGAAAGTGTGAGCTTCTTCTGCT  
GAGGGAACGACGCTTCTCCGCTTCGAGATCTTTTCGAGAGATGCGAGAGGAACTTGTGTAACGCTCTGCTCGAGA  
TTTTGGAGCTTTTTGCGAGTGCCTGCAAACTCCATTTACTTGTGAGATCAAAAACAAATGCTCTGAGGAATGTGTTTCC  
CTTGCAGTTTTGAAAGAAGGCGAGTTCTTCTTTGGAGGAGGAAGGTCGTTTTCTTGGAGAGATTGTTATTTGACCCCA  
TATTTCTTTCTGCAAAATATTTTATGAGAAAATATTTATGTTTTCCTTCAATAATTCGTGCTCAAGGACATTTTTATTGT  
CGGTCTTTCTGTTGCTTCTTTGGAAACAACCAAGAAAAAATCCCTTTCCGCGACGAGGAATCTCAAGAAGGAACTTT  
TCGACTTTATCGTTTTTCGAGAAGTTCTGGAACATTTCTCCAGAAAAGGGAAGAAAGAAAAGGACATGCAAAAAGAGC  
ACGCCCGCTCCAAACGTCACATGCGACTGCATCTCTCTCTGTTTCTCTCCGTAACCTTTCGGAGCACAGTATTC  
GAAAGACCTCTCGCGGTCGGCTTTTGTCTTTTTCGCGTTGAGAAGCCAGTCTATGAGTTTCAACCTTTTTTGTGAA

CCATCACGTTTTTCGCACTTGATATCGCAATGGGCAATTCGAAGCCCGTGGACAAACAAAAGAGCGTTGCAAAATTTGGCGA  
AACCACTCTTTCGCTTTTTCTGTTCGACCGGCTTCCTTTGACAAATTCGAATATGGAGATGCACCCGAGATATCCAT  
CACCGTCCAAGAGTCCCGCCGAGAGAGATTTTTTCAATCACCTTGCAATGTTTGGGTGTTGCGGAATTTCTGGATCGG  
AAGTCCCATATTTACAGCATATCTTTTTCTCTTTTTTTAGAGCCAAACCTGGCTCTCTGAACCAGAGCCGACGATG  
TGCTTCTCTGATAATCACAAGGACTTCTGGAAAAAAGTCTTCAATGTTTGTCTTTCGAGTGTAAAGAGTAAAGTTAT  
CAATCTGAACTGTTCAAAAGACAGAGGAAGTTCCTCTTTGCTTTTCAACATCCACAATACGCTGGAATGAAATGGT  
TTTGTTCAGAGACGAACAACACAAAATCACGAGTGTAAAGCTTCTGCGGACATGACGAAAATGGTGAATTTTTTGGAA  
GACCTTGACCAGGCAAGAAAAATTCGACAGAGCTCAGAAGAGAGGGCTGGGTTCGATTCACACAACTTTTCGATCAC  
GTTTGACAGCAAAAGCCAGGCTTTCAAATATTTTAACTAATTTTAACTAATTTTAACTAATTTTAACTAATTTTAACTA  
ACGCTGAGGATGGAGATTGCGATCTGTCTCGAAATTCGTTGCGAGTGAATTTCTGCGAGGTCGGAGAACTGTACTGTG  
AAAACCTTCCCTGGACCTGATTATAGACCTGTCTCTCGTGAATGATGATGTTGCTCGTCTTTGGGAAGGATGGTG  
CTCTCTTTTGAATGTACCTGTCTGCGTAGAGGGAGTAGAGATAACTGTTAAGCCTCTCGATGTCTTCTGAACTTCCGT  
AATTTCTTCTTCTCTCTGGAACATTTGAAGCAGCTCTCGGAATCTCTTTGACTCGACTTCGAAAGTTGAGGT  
AGCGAAGGGAAAGGCTCGGCTCGTTTCCCTAATGTTTCTCTTTCTTGTGATTTCGGCGCTCACAACTTTGAGTACGTC  
CCGTTTTGGAGAGAAAAAGGATTCGGTCTTCTTCTTGTGGGGGATTTGGGCAAGTCTTCAAGATTTTCATCGAGATT  
CACAGCTTCGGGATATGTGATGTTTGGATGTTCCAGGATATGTTCTGCCTCTTCGAGAGTTTCTCGTTCGAAACGGAG  
TTTGGACCTCAAAAGCCAGGCTTTCAAAGTTTGAACAATTTCTGTTTTCTGGGTGTGAAGCAAGAAAACTAAACA  
AAGTTCTTGTTCGAGAACAGAGAGTTCGCTCCTCGGGACACAGTCTCAAAACAGCTCACCAAAGTTTTTCTTGTCTGA  
CCACCTTCTGTTTACAGTTCGATGAGACGATGGGATGAAATGTACCATCTTTCGTTGTTCCAGAAAACTCGAAGAACGG  
TTCCTCTTCGACCAATGAGCGCTTTTGATAAATTCGTTGCCTGTCGGAACCTCGAAATTTCCGGAGTGAAGGGAAAG  
CTTTCGCAAACTCAATGTACTTCGGAGCGCCAGTTCGGAAGTCTATTTCTTTTCAAAAACAGGCTCGACACCTTTG  
AAGAGAGGGTTCGGAGGTTCTGTCGATGTAATGAACGAGAAGCATTCATCGACTTCGTCAAAACTTTTACCTGCGACA  
CAAGAGAAATCAGGATTCGAGAAACTCGAGAGGGAGTCTCAAGTTTCTCTTTGTCGAGCATGTTTTTCTCTTCT  
TCCGGTTCTCTCTCTCAGAGCTCGAAGTTGTTCAACGTTGAGAAGAGGGACTTGTCTCGGATGTTTTTCCAGAA  
CATTGTTGTTCTGAGTGTCTCACTGTTTAATCCACAAGAGTAAGGATGAAGGTTCTGTCTGAAAAAGTTTCTCCAGATG  
GGGAGTTTTTGTGAAAGGCGCTTCGAAACCATGTCAAAAAGTTGGGCAACAAGAGGTTATTTCCGCCAGATTTCGAGAC  
CGATTCAGAGCTCGGTTTTCGCAATCTGGCCTTTGACGAGAGTTTGGGAAGGTTGCGTTTGGGAGGAGTTCGGAGCA  
AACATCTACAGTTGTAGTTTCGACAGAACGGAACCTCGAGATATCCCTCAGCGAAGAACAACCTCTTCTTCCAAC  
GCTCTACGCGAATCAAGGTGCAATGCGTACAGTTACAAACCTGGCCTTTCAAAAACAGAGTCAACAACGAAAAACAGGC  
AGATTGTCTGCTCCAGCGAATATCCGGAGCGCTCATGTGTTTGGAGCAACTATAAAAAATATTTCTTCCAATATTTT  
GTTGAATGAAAAATTTGGAAACATTTGCTGTTTTTCTTTCACATCAATATGTCAAAAATTCACCTCTTTCGCTGTA  
AGCAGTTTTTCCCGAGTTGAAATTTGACCAAGAGCTCCAGCATCTTCTGACACTCTTGCCTCTCTCGTGGAAAGTTG  
GAGAAAAAGCTGTCACTGTAAGTCTGGAAGCGATGCCACAGACAGCTATGACGAGTCTGTTGCGTACTCTGTCACTATG  
AGCCACCCGACGAAAAATCTTCTCGAGCTCTGGGATGGGAAGCAACGGCAAAATGGTTTCAATCGCCCTCCAGACAT  
GGGATGGACCTCTCTGACTTTATTTGAAATCATGGTCTGACACTGCAAGCCAGAGGTTGTAGAAACATTTTCAACA  
AGATTGTCAAGGGCTCCACCATCTTCAAAAGCTCGGATGTTCCACACAGACATCAAAACAGAGAAATGTTTGTCTG  
AGACAGGAAATGTCAAGATCGGGATTTTCGGAAGCGCGACTTCTCAACGACGGCGTTGTGTACGCTGACTACGAGGT  
TACTACGCTCTGGTATCTGCTCTCGACATCATCTTTCGGAGAGGAAAGCCTTTCACCGAAGCGCTCGACATCTGGAGT  
TTGGGTGTTTTCGAGCTGTATGTTGGCTTGGGAAGCATTCTGTTGATGAAATTTTCGAAAGCAAGCAAGCTGGGATGGT  
CAAGCATA  
ACTGGACGCTCGGCGTCTCAGCGACTATGAAAAAGAGAGCTTCTCCCGAGCAAGTACGGCGCTTTTTCGAGAAAGGA  
TAGAAGACCCAAAGCTCACTCTTGGCGATGAAGAGAGTTTGGACTGCTTTGCTCCAACATGCTCTACTACACAGAGG  
CTGATAGACCTACAACCGGACATCTTGGAAATCTTGAACAGTAAATATTTTAAAAGTAAAAATTTTACCTCTCAT  
GATGTTGGAAGAACTCGAGATTTGCTGTTGGGAAAGTTGCTTTGTTTTCGAAAGAGGGGAAATATATATAGCTTGG  
TATTTCTTTCAGGTCGACACATACTGAAAGAAACTGTATTTGGTACAGCTGGAAAAGGACCACAAAATTTGAAAAG  
GAGAGAAGGCGCTCAAAACATGCGGAGAGCACCCAAAAGAGAAAGGTTTTGTCTCTCGAATAAATATTTTATAAA  
AATATTTTATACAGTCCCATCGGAAAACGTCGACCAACGTCAAAAGTCTTGGGAAACATATCCACCACCGACAA  
ACTCTTTGTAAGCTCTTGGCGAAGCTCTTCAAAATTTCTGGATGAAATTTGATGATGTTGTTCTGCTCTCTGCTG  
TCACGTGTCACCCATGCGCAGATGAGAACTTTGGAGTTCGACGCTCTTGTGTTCCGAATTCGAGAGTTTCATACGAGC  
GCTGAAATTCGCTCTACCTGTTCTCTGAAACCGATCCGGATGTTTCGCTTCAAAGTAGCTCAGAGAGTTTCAACGCTT  
GCGAGTGCCTGAACTGCACGTCGCGCCCATGTCCACAAGTCTTCCAAAAGTCTCTGGGCCATCTGTTTGGAAAGAGAT  
GCGCTTTTCTTTCTATCTCTTCCAGATGATGACAAACACATCAGAGAGTTGGAGATCATAGTCTGTGAACGTCGAGT  
GTCGACAGAGATTCTGTGAGAGCGGCGAGGGCTTCTTTTGGTCTTCTGCTCTTTAGCGTCTCCGTTACAAGCGCAACGA  
CCTTTGCGTGGACAGAGGGAAAGTCAGAACATCTGGTGTTCCTCTTCCATACATTTTCCAAAAACTCCATGACAGAT  
TCGTTTCAGGGAGCTAGTGTGGACGTTTTGTTTTGTCTGTGTAGACCGTGGTCAATCCATTTTCGACTGGGCGATTATGTT  
GAGCACTGTCTGCGCTCTGGTGGGATTTTCGCCGTTTCAAGCCTCAAGAGCACATCGAAGCGTCTGCTTGGAAATTTT  
CATTCCCGAGACCGAAATCTCTGAAATCTGAGCAACCATCCATAATTTCTGCTTTTTCTCTCTGCTCAACGATGACC  
AACTGGAGAAGGCACTGCGCAGACAGAACGTTGTCTGGGATGCTGTTGTTCTTTCACAGAGAAGAAAGATTCTTGGAT  
GTCTTTGATGAAATCTGCTGGGGCAGTGGCCCAACTCTCTCAATGTTGCAAAAGAGATTTAGGCATCCAGTTTTGCTGA  
ACTCTGCGCGAACCTGTACCGATAGGGGCTGGAACTTGGAGTCTTTTGTGATGTCATTATCGTGTCTTGGCGGTT  
TCGATGTGCTCTTCTCTCTGAAAAACAAGAAATTTAGAGCTTCGAGCCTTGGGAGAGCAACATTTTGAACATTT  
GGAAAGTTTAGAAAAAGTTTATAACATACCTCGAAATGTCAGATTTATAGAGACAAACGACGTTTTCAGCAGCTCTCGA  
AAGATTCGATAAAAAACAGACTCTGAGCAACCAAAAAGAAAGGAACTTCTAAATTTTCTTTTTTCTTCCAAATATTTT  
AGAGAACTCTCGAAGCTGCGAGGCAATCCGCTCCACGTCGCTTCTCTGCTTTTGTAGATCGCTTCGAGAGCTTGAAT  
TCTGTTCTCTGCGGAAGCATGGAATTTCTGCAATTTTGTATTGCTGGGCTGCTTCTGCTTGTTCACATCAT  
CTGAAGCGACCTAAAAATAAGGCTCGGAGTTTCTGCTTTTCTGTTTCACTCCCTGTTAACTTGTCTTTTACAAGGT  
CTTAAGGATGTTCTGGAAGTGGTCTCTGTTTTGACAAACAAGGAAACGTCGACATGAGAGACCTGGACAAAAAGAAATTC  
ACAAGATTATTTTGGACGGAGGAAAGAGGCAAGATTTTCAATGTTTCGAGAGTTTGTGTTTTCGAAACCGTACTACGTT  
TTTGAANAACAGAGGAAAGCCTTTTTTTCGATCAGTCAACAGATTTCAAGATTTTCTTGGAAAGGAGGAAAGGAGTTTT  
CGCTCTCGAACTCAAAGAGGATTTTATACAGGGAAGGATTTGACAGGATCTGTTTCAAAAAGAGAAAACTTCAA  
GTGAAGTCGAGGTTTTCAAGGTTCTTCTCAAGGAAGATTTTGCATCTTGTGTGACAGTGTGAGAGTGAAGAAAGTTCATGA  
GCAAGTACGAGTCTTCCGACGTTTTTGGAGCGCTCGAGTGGTTAGAGAAAAGGAAAGGCTTCTTCTTCTTCTG

CCGAAGAAGAGCTACATTTTCAACGTCGAATTTGGGAAGAAAAAGATTGTAGGAAAGTTTGTCTGATGGAACGAACAAGAA  
GTTTTCCATCTCAAAGAAAACGGACGAAACGAGGCTGTACCTCGACTCTTGGTCTTTTCATGGACGGCTCTTAAAAAATTC  
TCATCGAGAAAACGGGAAGATGGCACTTGGATGGGAAGAGTGAAGCTCGGAAAGGAAAAAGTCCATTTGGTACGTTGTGCAA  
TAAATATTTTTTGTATAAAATATTTTATACTGTTGACCACTCTGCGAGACGGAGACATATCTTCTTTTCGTTCCGCTGC  
TCGGCACTCCCACCTTTCTTTGCGATATCTCTGAGCTCTACGAGAGTGTACTTCATACACTCTCTCGCATCGATGAGATTT  
TCAGAACCCTTTTGTGGTGTTCGGGTGCCTGTTCCAGCTTCTTCTTGGAGCGCTTCTTCCCTTTTGTAGCAACACTT  
TACTCCAGACTTCATCTTTCTTATTTCCGAACCGTCAAACGACCCCTCTTTCCACTCCTGTGATGGGTCTCCTTGCTG  
AAGGACATCCAGGATACGATTCTTTCTCTTGGTATTTCTTTTCTTGGATTTCTCTCTCTCCGACTCTCGTCCGT  
CTCTCATGGAAGCGGTGATGAGCAGCATCTCTTGAAGCCGACCGGACCAAGAAAGACCGTGTCTTTTGGCCACTGT  
TTCAACGGCTTTCTTTCTTTTCCCTATCTCTTCCGTTTTCGCTTGGAGTGTCCAAGAAACGCGAACGCCCTCGTAGA  
TTCCCTTTCTCAGTTTCATCAATGAATTTTCTCTTGTGTTGTTGCTGCCAGATATTTTGGTCTCTGTTTTTGAACAAG  
AGACGAGGAAGAGTTTCTCTGCTGCCTCTGCGGAGTGGCTTCAAGGGGCAATGTACCCCTTCTTTCGTTTGAACA  
TTGCGACTCTTTGTCCGAAACAACCTTGAATCTACTGCGCTTCTTTCAGCGCAAGAAGAACTCTTCGCAACCTTTG  
CTTTTGGTTGGACGATTTCTGATATAAATTTATCATCCACTGTCTGCTTCCCTCTGACCGCTTTCGCGGATACAGCAA  
ACCTGCACTTCTCTCTTTTCTGGAAGGTCTTTGTGGGAGCAAAACCTCACAGCTCTCCCTATCGCCTGGCTGATTTG  
GGCTTGGTTAAAGAACGGATCGATGATGTGGACATGTCTACCCTTTTGGAGTCACTCCCTCTGAGATGCTCTTGGAA  
CATCATCCTTGGATGAGGAGCATCCGCGTTTTTCTCTGTTGTACGCTTCAAACTCTTCTCTTTCTTTCTTTT  
GTTTCGTCGCCAGTAAAAAGGGCTACTTTGGTTTTTGTCTTGTTCGTACTTGGCGAAACCGTTGGCTTCGAGCGC  
CTTGGCGATGCTTGGCGCTCTCCATAGTTTACAAGTTTGGATTAACAACGCGCGGTGTGCGATCTTTTCTAGTTTTT  
TTAAAAGTGTGGCAACTTGCAGCTGTATTTCCGAGTTTGGGCATCTTCCACATTTCTTGGTTCTGATTTCTGGCCA  
TTGCTCCCAAGAACCGTTTCGATACACAAGTTTCGCGGCTTGCCTCTGCTTTATAGATGCTGTTGTTGATCTCGAG  
ATTCTTCTCTGAGCTCCTTGGTGCCTCTCGTACTTGTCTGTAAGCTTTTCTGAAATCTGACATGTTGCAGACAA  
GAACCTTTGGGTCCCTTGACTTTGGGGTACGCTTTGGGTTCAGCACTCGAACGTAAGAGACGAGTCCCTTTATTTCTCC  
TTGAATTCGTTCCATGTTTCCAGCGATGACATCTCTGTTCTGCTTTCGCTTTCAGACACCACCTTTTCGCTTTCGAG  
GATGAAGGGTTCGCTCTGAACTTGGAGATGTTGAGAGTTTTGGCGATCTCAATCTCGTCTCAAGATTGGAGTGGCAG  
ACAAAGGACAATTTTGGCTTTTTCGAGAGGTTTGGAGTTCTTTCATCAGCGCTTCGTACCAAGCTTGCAGGATA  
TTTTGCACTTCGTCGATGATAAGCAGTCCATAATCTTTCATGTCAGCTTTTCGCTTTTTCGAGTCAAGGTAACCTTTT  
GTAAGACATCAATCGTATCTTTTGGATATTTTCTTCTTGGCTTCAGACACCACCTTTTCGCTTTCGAGACTCTGGTT  
TCTCTCTGATTACACTTCTGTCTTGTGAGACATAAAAATCCCTCCGCACTCTGACATCAACTCTCCGATAAAAATTT  
GCTTCCAATGACGCGGACAAAAGAACAGGGTCTTTTTCGTTGCCTTTTCCCATGTTGCTCTCTGCGATGCGAATGGC  
TTCCGAAGTTTCCCGGATCCAGCCCATGAAAAGAAAGAAATTTGTTGTGTCCTGTCTTGGCCCATGTACTCTTCCA  
TGAAAAGTTTGGGGGTTGAAGGTGAATTTCTTGGACTGCAAAAGTTCTTCCATCGTGAAGCTTCTTCCAGACTCTTG  
TATTTTCTTCTCAGAGCTTTCATGTCGCGCATTAACCTTGGATTTACAAGAAAAAATTTCAAAGTAATATGAGCATCAC  
GCACAACCTCGGCTTCTTCTTTCGAGCGAAACAGGAGACCAACAGCGACTCTTTCGAGCAACTTTTTCGCGTATCTCG  
AAGAACAAACAAAGTCTGCTGCGAGGTGCTCCGCAACATGACAAAGGCTTTGAGAACTTTTCGGAAGAAGTGTGCT  
CTGCAAGCAAGAACTTCAAAATGTAAGGAAGAGGTTTCAATGCTGAGAAAAGAACAAAGACACTTTTGGATTCGCT  
CGGATTTCAAACAGCATCAATCTCTTGGCGAGAGAATCTCGAGGCTCGAAGAGCCATCAGATTTTGAACAACTCTTG  
ACAAGTGGAGACTGTTTTGGAGGAAATTTGTGGAAGAAAAGTTCCCTGAAATTTGAAAAGAGACTCGGAGAGATTGAAG  
GCTCTTGTCTGCTCGTGAAGAAAAGCCAAAGCCACTCTGATTTTCAAGGAAGAAAGACTGAGTATAAATATTTTTGAACA  
AATATTTTTATGTACATGCTGCTCGGATGAGCCACAATCTTGCATCCCTCGCAAAAGGATAGTCTTTGTTGGATTT  
TCCGAGTCGATAAAAATCCACCGGTCGATGCAAGGCTGAAAGCTCCGACGATTTCAACCTCAATATCTGGATGGAAC  
CTTTGTTGTCTGTGAACGTTTCGAGAGAATTTTGAATTTGAGAGGAAATGGACAGAATTTGGCAAGAACGAATTCACC  
CATTGCAACCAAGTCCAGGACAGAGCAGCTGGAATATCTGCTCTGACCAAGGACCAATTTTCCATAGTTTCCGTT  
TGGTCGACATACTCACAGAGTACCATGTCGGATACACCAAGAGGCTGGTTCTGTTCTGCCTTCCAAACTGGAGAAG  
GGATGTTTTCTGTTGGAGTTCGAATTTGAGCTGTCAAGTTTGCCTCTTCAAAGAGCCGCTCTTGTCTCCCAAGGGG  
GTATTTTGGAGTCCAATCCCTTCAAATCTGAGGATGCCAAACAGAGCGATGACTCCCACTATCAGCAGAACGACGACG  
GCAACAGGCGCTTCAAAAACCGGACTCAATCTCTCTGATATTTTCAACAAATACGATCTGCAATCCCAACTCTTCC  
TAGATGGCAAAACATATCGCAGGCAAGGAATTCGCTGGTCTCTTTTTTATTTTTGACCAAAATTTCTTTCGGCACATC  
CTCATGTTTTATTTCTTGGCGACAGCAAGGACAAAAGAGTTTCTAATTTTTTCAAAGCAGGTTTTGTGGAACCTGTGAC  
CACAGAAGAAATAAATCCGGTTCCTTTTGAATAATTTCTCGACACACCAGGCACTCTTTCAGAGAACTTGGAGTTTCA  
TCCGTTTTTGGGACAAAACAAAGTTCTTCCGAATCTTGTCTCTTTTGGATCTCTCTCCGTTCTTGTTCGTTCTTGT  
ACATTGAGACATAAATCAAGTCTGTTGAATTTTCTTCTTGAATGGTAATATGACTATCTCGAGGAAGAAGAC  
TTTGGTACTATGGGGAAACAGAGAACGTCACAACAGAAAGACATTTTTTTCGAGTACATGCGAGAGGTCGAAGAGGGAG  
AGAGCAAGAAGCTTATGAAGACATTTGTCGGAATCCAGGAACAAGAGCAAGAAATTTGCTTACAGCTTCCAACAGATGTTCT  
CTTTCAGAAAGTCAAGGGGAAAGTTCCAGCGCGGTTTTCGTTGGAAGGAGAAGAAATCATCTGATGAGGAAAGGTTTCGAA  
AAGGAGGTGAAGAAATTTCAAGAGGAAGAGTTCGTTGACAAGGCCGGGACCCAGGGATAAAAACAAAGATTTGTCGAGAA  
GTTGGAGGAACCTTCCAGAGTTCGATTTCTACAACGTTGAGAAATTTTCAAGAGCCTATCTCTTTGTCCAAAAGAAATG  
GCAAAAGATTTCACTCTGAAACAAATTCAGAAGCTCCCTCAAGGCATACAAAAAACAAGAAAGCAGATGATAGCAGAGGAT  
TTTCTCAGGTATTGCTCATCGTCTGGACCATATGTAATAATTTTTTGAATAAAAATTTTTATTGTCTCCAGACTCTG  
CTTTTATCATCTGCTCGAGGAAACCTCTCGGATCGGGAAAGCCGACATCTTCCAACATCCGACAGCAAAATTTCTGCTTTT  
TCTTTCTTTTGGAGCGAGGGGCTTTCGGGCGCGGCTCGAGTTTTTCTTCTTATACCCAAAAATTTCTTCTATGGACCT  
TTTGACCATGTAATCCAAAAGTTTCGCTTCGAGACCTTCTTCTTCCCTGAGTTCTTTGCTTCTTTCGGAAGTCCGCT  
TGAGTTACCGGAGATGCTCTCTATCTGTTTTATGTAAGATGACATAGTGAGTTTCTTCTTTCTTTTGGTTCTTTCAA  
GAAAACATATATGGAACCTTTTGTGAAATTTCTTCTTGTGTTTTCTGGATGATCGGAAGGACAAACCCCTTTGTTCTGTA  
AGGATTTTGTCTGCTGCTCTCTCAGAAAAAACAACAGCAAAAGTCAACAGAAAGCTCAAAAGGTAAGTGTGGATT  
TCTGCAAAAAGTACCATATTTTCTTAAACAACAAAGAGGTTCCGTTCAACATGATCGGGAAACATTTCTTGGATGGGA  
AGACGATCTTTGAGAATGGCAAAATACCTTGGACCAACAACAGACTTTTTTGGTCAAACGGTCACTCCAACAGACCTTG  
GCTACGACGAGGTTTTCCATTTGAAGTTGTCTTCCAAAACAGAAATTTCTGGTTTTTCGAGAGGGATGAAGCCATTTCCCT  
TCATAAAAATTTTTTGGCAAAAATATTTTAACTTCTCTGCGAGTCTGACCGAAGCTCTCCGTCGATGACAACTT  
CGGTGCTTTCGAGAAACAACCGAGAGTCTTCCAGAAAGCTCTCAAGTCCGTTCCACAATTTTTCTGTCGCTGTCTT  
TCGTACTTTTTGGATACATTTCCCTTGGCATCTCTGATATTTGTAAGGATTCGCCACACACTTTGAGGTAATTTCCA

ACCTCCCATCGTGCAACGACGCTCCGATCCAGATGTCACAGTCCCTGGATGACCTCTCCATTCTCCCTTTGGATTTTGACCC  
TCGAAGGCTCCCCGAGAGCGGGCCGTACTTGACAATGACGCAAGGCACTCCCTTTTCTCTGCGAAAGAAATTTGGAC  
TTTGTCTCTTTGGATGTGCCGTCCCGAACGCGACCAAGAAAGAGCAGTCTGCAACAATCTTTTCGTTCCCTCAGAATATA  
GTCCCTCTTTTGTGGTCTTCTGGTCTATGAACAACAAGAGGAACTTTCTTGTGCCCTTGCCACATCTCTGCAAAAT  
TGTCTGCCCTTTCCGCTCCACAGAGCAGTCTGAAAAATCTTGTGTTTCCATATTTTTCTCATCTCTCTCGAAAA  
AGCTCCTTATCGCTAAAGTCCCTTCCACCAACAATCCGATGTGCTCATATTTTTTATCTGATAGAATAAAAAATCTTA  
CGAGTTCAATATCTCAAGACGAGCACATAAACACTCCGCTTCTGCGGCGACTCACAGCGACTCCGGGGCGCTTGT  
CTGAGATAGTACATTCCTGTCTTTGCTCCGTTCTCCCATTTGATAGAAATGGTAGGACGTCAACTTTTGGTACGTCGGAT  
TCGCATGAAGCAGTTGTGGAACCTGACTGACAAACGTAACGACTTCTGTCTATGCCGAGTTCCGAGCGCTTTCTGAA  
AAAGTTCAAAGCGTTGAGATATTTCTTCTGTATGTGTTCAAGCGTTCCTTTTTCGTTGGTTCGCTTGTAGAAATTCCT  
TGGACTGAACCTTGCCCTTCAAACATTTGAGCATATTTGTTGTGCCAAGCTCCGAGGCGCATCATGTCTGACAAA  
GTGTCTGTTCAACCGGCAACCGCACCCTCAAAACAGTTCTCTTTCCGATGATGCTCGTGAACGCTTCAAAGGATTCGT  
TGTTTTCTGAGAATTTGTGCTGTGCTTGCAGTGGGCATCAGAGCGATGAGGAGACTGTTGTAGACACCATCTCTCATGTC  
TCTATCTCTCTTTTGTCCAGTCAACGCGCAAAAAGATTCCGGGATTCCTTTTCTTTCTGTATTGTTGACTTGCTC  
AATGTGTATGACATCAAAGGGAATTCCTGTCTCTTTGTGGAGAGATTGAGCATCCCAAAGGTCATGAGAAAAGAAACCT  
TGGAAAAGAGGAGAACCGGAAAAGTTTCATAGTATGGTGTGTTGGAAGCCAGAGAAGCCCTTTCTTTGAGATCTTTCTC  
GACTCTGAGATTGCTGCGTGTACTCTTCAACATAAAATTCAGAGAAAGAGGATTCCTTATTCAGGATTTTGTCTTCTCGT  
ATCCATCATCGAAAAGTGTCCGCAAGTCCCTGCACTCCAATGCCGAGAGGCGATGTCTCAAGTTCGTCTGTGATGG  
ATGGAAGTTCCGAAAGGATAGTAGTTTCTGTCTATGACGTTGTTGAGAGACCGAACGATGAACCTGACAGAAAGCAGCAAGA  
GAGCCAAAGTCATATGCTGCTGTGTTTGTCCAAAACTGTTGAGACAAAAGAGAGATTGACAGATGCAATCTC  
CTCGTCCGAAAGTCTCTGTGATCTTCAACATAAAATTCAGAGAAAGAGGATTCCTGTTGTTCTGTGTTTCTGTTTCTT  
GACAGATGGCGTCTTTGTAGACGATGAAGGGCATGCCACCTCCGCTTGAGCGACGAGAAATGTGATGCCAAAGTTCTTGA  
GCTTTCACTGCTGTTCTGCGCTTTCTTCCCTCTCGTACTTTTTCGATCAGTTTCTCAAATCTTTGTCCTGATGTTTCTGTC  
GAGACCGGAGCTTCTTTGGGCAAAAAGAGACTCCAATCTCCATCACTTTCCACCTTCTCATGAAGAGGTCAGATGTC  
AAATGGCGTAGAAAAGTTGTCTCGCTTTTGTAGGTCTCTCTCTGCTTCTTTGATCCACAAAAGTGAAGATATCA  
ATGTGCCAGCAAGCAAGGAAAGAAAGTTCCGCTTCCCTTTCGTCGCTCCTTGGTCCACATATCCAGAACAGCGCTG  
AACCGCAGAAAGAGAGACGCCAGAAAGATTCCGCAAGACTCCCAATGTCAGAGTGTGAAAGCTTGGATGACAGAA  
ATCCAAACGCTCCGCTTCTCGACGAAAAGAGACTGATGCTGTTTCCACGATCGATGATGCCGATGAGATTGTCTGGAAT  
TTTCCAGGAAACAGGAAAGAGCCAGAAAATTTCTGAGACTGCGTTGAAAAGATGGGACTCGCCACCGTATAAAAGTCC  
AAGAGAAAGTCCGTATAAAACTGCTGACCTTTTGAACGTCAGGCATCCAAAGCTGAGTGGCGACACGAAAGTACATGT  
GCTGAGGTCTCTAAAAACTCGAAGTTTCCATCATAGCACTTCTTCTCAGGATAGGATTTTCAAGGGTGTGATG  
GCCATCCAACTCAAACCGGTAGTCCCTTTCTGTTGACAAACAACTCGTCCAGTCTTCCGCGATGCGAAGCGACAAAATCATA  
GAACCTCTCGTCCGACGCTCTCATCCCTTCCGCAATGTCAGAGAACTTTTCTGTTGTTTCTGACCAGAGCTTGGCAA  
TTTCCGCTCTTCCGCAAAACTCCCGATCGGGATGATGAAACTTGTAAAACCGCAGACTTCTGAGAAAGCTTGTGAAA  
AACTCAGAGTCTGTGACGATCGATATCTGAAAATCTCTGGGATGACGCTTTATTCACCGAAAGACCCACGGAAAG  
CTCGTCAAACAATTCGAAAGCGGAAAGAACCGGACATCTTTATATTTGAAATTTCTTTTCGATGAAATATGTCTTTGTCG  
GTTCTCTTTGTCGGCTTTTCTTCAAAAAATATATTTGAAGAAACACTTTACCGAAAGCAAATGACTGAACATCTGTTT  
CTCGCAGAGACTCCTCAAGGGCATTTCCATCAAAGTTCTCATCGAAATTTCTCAACAGCTGTAGCGCGAAAGATATTTGCGT  
CAAAATTTGCAAAAAGGAAATTTTCCCTCCACTACATCGACCAAGGAAACGATTTCTCATCGTCTCTCTCGACGAA  
AGGATTTTAGAAATTTGACTACAACGCGATGTCGACACCAACATTGGTGTGAACATCCAGAAATTTCTGTTCTTTT  
CGTTCATCAAAGAAGGATGTTCTGACTTTGTACATTTCAAAGGACCTTCAAGTCCGATCTTCCGATACAGATTGCTCC  
TGTCTCCCTTGGAAAAAATCTTCCGCAAGGTTGAAGATTACGGTCTCAAGATCCACAAGATTCAGGAGAAGAAAGTCCG  
AGGTTTCCAGAGGAGGAAAGGTTCCATTTTCAAAGGTCATTCAGGTTCCAGAAAGCTGTGAAAAAGATGAA  
CTTCTCGGAAAGACCACAAAATAAACATGGAGGAATCCAGTATCTCAAGTTTTCGTCAGACTGCGCAGAGCTCATGGA  
TGGAGGAATCTCTTTCGGAGAACCATCGAGAAAGGAGAAAGTTACGAGGCGGAAATTCACCACATTTTCTCTCAACCA  
TTGTA AAAATTTCTGACTCTCTTTCAGATGCCAATCTTTCAGCCAAAGCTCCCAAATTTATCTTTAAAAATTTCTCTG  
TCTGTTGAGGATCGGAAAGGAAATTTTTCATCAAGGACAGACAAACCATTTGAACAGGAGGAAATTCAGCGGTT  
CTAACACGCTTAAAAATTTCTTCTTAAAGAGAAGAAATCACAGGCTTTTTTTCCACTTAAGGCAGATGAACACTATGGA  
CTTTCCAGAAATATCAGAGTTTGAAGAGACGACAGCAATGTTCTCACCTTCCATCGAAGAAAGAAAGGAAAGAGAA  
TCTGCTTGGAGTGTTCCAAATTTTGAAGGAGAAATTTATACACTGAAAAGGATAGCGCGACGTTTGGCCCTAAAAGA  
ACGTGCGCGGAAAGTCAACAAGAGGAGAGAAAGAAAGGAAACATTTTCAAAGACCTCGAAAGGTTCAACTCCCGGA  
AAACGTGATGGAAGCAGCCATGTCATGACCAAAAAATATGGA AAAAGAGGCGGAGAAAGCATCCATCAAGAGAGGCA  
AAAAAGAAAGGAGTCAATATCGTGTGACGAGAAAGGCGTTCAAACAGTACGAGAAACATCGCTCCGTTGACGACGTC  
GCCGAACAATTTGGAGAAACACAGAAAGGAGCCATTTCTTATGTTCTCAAAAAATATTTGCAAAAGTCTTTCCGAGAGCC  
TACAGACTATACGAAACCGCGGATCTCGTGGCGGACAGTGACAAAGTGGCGATTCCTTTTGAAGTACCAAGAA  
TTTACGAGATGTGCTTCCGTTCAAGGCAAAACAAGGATGTTGAAATCTGCTGTCCCGAGTCTGTTGCTTCCGCTGTA  
GTTTTCTTTGGCAGACAATGAACAAAAGAAAGCCTTGGTCTGCTACATGAACAAAAGACTTTGCAAAAACGTGTGAG  
TCTCAGCGAAGCGACCATCAACAAACCGCAAGGAGGTTTGGAAAAATTTCTCGGTCTCGACGACTCAAAGTATAAAAT  
TTTCTTCAAAATATTTTATTCAGGATGGA AAAATTTATCCATGCTCTCTAGTATCTTTTGTCCATCTCGAGAACACGAG  
CAACAAGTTCAAAGTTTTTTCTTTAGTTGAGAGACTTCACTCCAGAGTTTTTGTATGAAGTCTCTCATCTCAGATAGG  
TCCCTCTCGAGTCTCTTATCGTTTCAACTTTTGGTCTTCCGAAAGGAGTCTGATAATGACTTGGTCTGTTTCTTCT  
CATATTTATTTTGTCTCAAAAAGAAATTAGAGTATTTGGGAAATAAGTTTCGTCGATGCTCAAGGAAACTTTG  
CGTTTCTACCAAATTTTACAGATTTTCTCATGGCAGAAAATCTTCTTTTCTATAAAGTCTCCCTTCCACGCTTCCA  
TCAAAAATTTCTGTTGTTCTGGGGTTTCTCCCGAGCGTTAAAAAAACAAGGAACTCTCTGTGGGATTTGACGACTTTT  
TCTGAAATTTCCAGACTCTTTGATGTTTGGCAAAAGATGTTCTTCTTCTGAGGATTTCAAACGATGAGCAGAG  
TTGGTCCGCTTCTTCTGTTTTTTCGAGGATCTTCTTCTTTTGTAGATGTTTTTGGAGAGATGTTCTTCTATTTCCGG  
AAAGGAGATTGGGAGGGCTTCCGCTTCTTCCATGGTTTATTCGGCTGTACGATATATTTAAAGACTGTGGCTTTCTCT  
TGAGCTTTCAAGTCCGCTATGTCAAAAACAATTTTGAATTTTCAAGAAATTTTATTTCTTCTTCTGCTCCCTTTTCTT  
TCCCATTCGAGAACTGCGCAAGCACCCTTTTCTGTCAGTTTCTTGGCATCTTTGGCAGCACCAGGAAAGCGG  
TCTTTGAAGCTGTGGGTACAAACACCACACATTTTCTATCTCCATACTCATCAGCAACCAAGACATCAAGCACTCTGAA  
AGTTTGTATGGCGTCCATGTTGTTCCATCAGAAATGTTCTCCGATTTGCTTCTTCTTCTTCCGAAAGAGGTCAAAA

CTGTTGCTCAATCACAAGATGCTGGAAGTGTCCCAACTCTTTTTTTCTTCCAACAAGGAAAAAGGTTGAGACGAA  
CCTGAACATCCAACTTTTTTTTCATCAGAGGATATGTCGTAGACGTCATGTCGATGCGCTCTCCTCCCAAAGGATGGAG  
CGTTTGACCTCTTCGTACGTGGATGTTCCCTTTGCTCTTTCCCTTTTGTACTTTGTGCCGAAAAATTTCTCTCTGTTC  
TTTCAAAAAAGATACGTCCAGTTTTCCACAGACCAAGCAACCGCTTCCATCCGACGTCGAAAGACGAAACTCTGATGC  
TTTTCTTTCCATCGATAAACTCCTCGAAAGACGGGATGGTTTTAAAGTTCTCGCCTTTGACATTTCTCTATAAAATATT  
TTTTGCTCAAAACAAAAAATATTATGCTGGCAATGTCCCAACAGCCTCAAAACAACATCTCGAGCTTCTTCTCAAACCTCG  
GAGAGTTCCGTGTTCTCTACAACAACATCCCAATATCCAAGGAAGACGCTTCTCTTCCAATTCTGAAAACTCGCGAG  
GAACATCTCTCTGAAATTTTGACGAGAACGAACCCATTCCGTGGAAGCATTTCAGCCTCTTCTTTCTTTCGTACGTCGGT  
ACAAAAATATTTCCCTTCTGTGTAGACTTATTTGCTCTCCACCTGGTCAACAAACAAAGAGAGTTTTTAGATGTCCG  
GTACTCGCCAAAGAAGGAGAAAGTTTTCTATCTTTTTCTATGGGCATGTCAAAGGTTTCCAAAACTTTATTTGTGAGCTT  
TGTACGAACTGACTAAAATTTAGAAATTTCCCTCCGTGCTTTTTTGAAGGAAAAAGCAGCGCGTGTCTTCCCGCTT  
CTCATGAAAGGACCGAATGCCACCTCATTTGTAATATGGAAAAAGCTGTTTGGTTAAGTTTGTGACCCATTGTGGGGGCT  
TCTGCCCTTTCTTCGGTAAATGATATGTTGACAAAAACCCGTATTTGGCTCTTTGCTGCTCTCGCTCTCGAATTTTC  
TCTCGTTTTTTGCCATGTGACCTGTGAGTTTGGGAGAGGTGGAATTTCTCTTTGTGATAGCGGAAATGCTCGCTGTTT  
TTCTTGTGTTTTCCGTGCTGTTTTATGGCTCTCTCGTTCAACAAAAAGTTGGAAGTTGTGGTTGGGAGTTTCCCTCGCT  
CTTGTTTCAATGACCTTTTGGGTATCGCATAAATTTTTGAGTTCAAAAAATATTATTATTTGCTGCGCCTTGACACGCT  
TCACAGCCTTGACGATATTTGTCTAGTTGACAGTGTAGCTCGAACCTCCCTCACCAACAACATGAGGCTCGTCCCTCTG  
ACTCGCTCTCCCTCATAGGAGAAAGGAATCTTCTGCGGCCCTCGGTGCTTCCACAATCTCGTACTGTACTTGACGAC  
TTCGCTGTCTTGTACTTTTTGAGAAGCGGGTGAAGGTTCTTCCCTCCAGCCTGGAGAGGAGCAGTGTGTGAACGATGA  
GGTCTTTCCCTTCAGAAGAGAAACATCCACAGCAGGTTTCGATGGATTGAGGAACAATCCGGAAGAGCGATGACCTGT  
TTGAAACAGGGGGTTTTCTCTCGTCTGCTGGGTCTTTTTAGGGGTCGTTTCCACAGTCTCTTCCCTCCGCGCAATCT  
TTCTTTGCGGGAGCAGCCTTGGGTTTTCCGAGTTTCTTCTCAGCAGGAGGAGCAGCGGTCTTTTTGGGAGCTGCCTCTT  
TTTTGGGAGCAGAAGCCTTTTGGTGGCAGTCTTCTTTTTGGGAGCGGCTTTTTTCTTGGGCTTCTCAACAACAAGTTCC  
TCTTCGGACTCTGATTTGTCGGTAGTCTGCTCTTCTGAGAGTTTCGGTTCGGTGGCGGCTTTGATTAATTTGTTGGCAG  
AGTGTCTACAAGTCTTTTTCTTAAAGTTCTGATTTTTCGGCGCCGAGTATGCGCAAGCGTTCAAAAAGTTTTTATCTTTT  
CAAACTGTAATTTCTACACTCTGATATTTTCGACAAAGCGGTTCTCTGTTGGAAGTGGAAATATACAAAACCCCTGA  
CCGACAGAACTTGAATCTCCAAAAAAGCCGTTCTTTTTCTACAGGCTTCGCTCCCAAAATTTTCTCATTACAACAG  
ATTAAGCAGCAAAATTCGCGGTGTAATGCGCGCTTGGGAGCAATGACCAATAAAGTTGATTAATTTGTTGGCAG  
CTCATCAAAGACGCTGCTATCACGAAACAACAATCTCTCGCGCCCTTCCGTCCGATCGCCCTTGCACCTGTGCTTTAA  
AGCGACAGAGGAAACCGTGAATTTGTGGCCAACAATCCGTTGTTCCGTATGGGTTCTGACCAAGCACAAGTCTTCCG  
TCCAAGGAAAAAAGCAAGAAAGAACTTTTTGAAAAACAACAAGAAAAAGCAAAACAGCCAGAGAAAGAGCCCGCTCCT  
CCTGCGCCTGCACAAGAAAAAAGAACAGGCAACGACAATCAGGAAGAACGCTTATGGGAACTGGCAGCACTCAGAGACTGG  
CATCATTTTTGAGAACACGACAACAAGGCTTCCGGTATCCAGAATCAAAAGGAGACATTTCTCCTTTGACGAAGGAGA  
CCATACAGTATTTGCAAAAAGAGGGGATGGAGTTACGTCGCGCCAAAGGTCGAAGAAGAAACGGAAGAGGAAACCGGAA  
CAGCAGCAAGAATCGGCCAGAGGAGGAGGAGGAGTCTGAAGAAGACGAGACGGAAGAGGAAAAATGACGAAGAGGAAGAAG  
AGAAACAAGCAGGAAAGAGGATCTCCAGAAGAGGACGATTAAAAATTTTTGGATAAAAAATTTACTGGTGGATACAAA  
GCTCTTTCCAAGGCGGCACAATCCACAAAAGCGGTCCGCTCTCATACCCTTCTCGTTTGCAACAACGAGAGAGATG  
TGTTCTTTGACTTGCAAAACATACAAGCGACAAGCCGTTCTGACAAACCAAAGGTTTGTATGATGAGCTCGATGACATTT  
TCTTCTTTCTCTTTCTTTCAGAAAAAGTTGAGGAAGAAATCCAAAGTTTCTTGGTTGAGTCTTTGACCGCTTTGGG  
TTTCCGAGAAACGTTCAAAACAGCCCCGAGAAGCTCGTAGTAGTACCACGTCGCAAACTCTAGAAATTTGGCGTTTCTCG  
GATCGACCTTTGATGCCAAGTCTTTGCAAATTTTCTGGTGTGTTGTGTTCACTTCTTCTCGATGGCTTCTGCTTCTCG  
GAAACACTTCCCTGAGCTTTTCGAGAGTCTATTTCTTATGGACATCTTGTGAAAAACAAGAAGAGAAAAAGTTCTTGTA  
ATACCTTCGATAAAAAAATATGAAGAAACAGCTCGTCTTCCGAAAGGACTTGTGATGTTTTTGGAGGAGCAATGAAGA  
AGCATTGAGGGCTTTTCTTTGTCTTTGCTCAGGAAGAAGAAAGATTTTTCCCTCCCAAACCTTCTCTCGTTTGGG  
ATGAAGCGGAAGAACTGACTTTTCCATGAGGAGAGATGTGAGGACAATTTCAAAGATATGGTTTGAATGTGCCTTTT  
AGCTATTTCTGAAAAACCTCTCCCTCAAAGTCTAAGATTGGGAGACGTCGCCCTGCGCTTTCTTTGCGTGTTCACAGCAAG  
CAACAATTCAGGTCTTTGCTTTCAAAAACAGAGAGGGGAACTTTCAAAAACAAGCAGAGAAAGGCGCTTGTGTTT  
TCGTATTTCTCCCTTCTTCCAAAAATCTGTATCAAGAAATTTCTTGGTTTTGGGACCATGTGCGACACAAGCATA  
GAACCAAAGTCTGGGGTCACTCTGGAATCCTCTCAATGTCTTCAAGAAATCAAAAAACATCATCTCGTGTATATCCAA  
TCAAGGACCACTCCAAAAATTTGGCTTGTGGGATGTCGATGGGAGGAGCGATGGCAAAGGCGAGTTTGTGGCACATTC  
GAGCCACGGGATGGAGAGGGGAGGAGCAGAGATCTGACTTTTGGTTGTCGAGGATAGGAAATGCGAAATTTGTGGATGG  
TTAAAGAACAACGCGTCCGCTGATTTCTCTGCGGCTTGTGACAAACGACGAAAGGAAAGTGGTGGTGGCTGACCCAGT  
GTCCTTGTTCCTCCGAAAGACAGGGGTATGAGGATTTGTCCTTCTCGTGGTTTTTGCACAACAAGTCTTTTTTGGG  
GCGACTGGCTGCGCTCCACTCAGTCCGACCTTGACATCACAATTTCTGGTTGCTTGCAGGCTTTTTGAAATTTGAAGAT  
GTCAAAAAATACGGAATGTCCAACATGGGCATCGGAGAGAGAAAACAGAGAATGGGAGATTGCACATAACCCCAAGCGTA  
TTTTGACAACCTATAAAAAATTTTTGGATAAAAAATTTTTATTAGACAGAGAAATTTGAGTTGGAGCCAACGATTTCCGAG  
AGGGTCATTTCTTTCCGAGTACGTTTCAAGAAATTTGGTCCGGCGCTTATGGTTTGTATTATTCTCGAGAATAAATAAT  
TGGAGCGAAAAAGTCCGCTTATGACAGAGGCTGTTGGGGAAGGACAAACCGGTTTGGAAAAACGAGACGCTTTGATAGGCTG  
AACTCCGCCAGCACATTTCCGGTCTCCCTTGTGTCTTACGATGACAAAAATAACAACACCTATGATGATGAGGGCGATGA  
CTGCGAGGACAATAAAGAAATATACACCTTTCCGGATTTTTTCCGACTTTTTTGCAGACGAAGCACTTTGTTGATG  
CTCCCTGTCGCGGTGGCGGAACCCAAAAATTCGCTTGCATCGCGCAAGAGCCGTTGACGTTTCTTGTGTGAGATGTC  
GATGCCCTCCAGAAATGTCAGAGTTCTGTGGCAAGAATCGTCAACCTGTCAATGCTGTTGAGACTGCTGATTTTACAGTGGT  
CTTCGATGGACTGGTTGATGCTTTGGCGGATGTCCTGATACGAAGTGTGTTGTCGCGATGTCGTTGTTCAAAAAACCGCTC  
AACCAAGATCCGGCGTTCTTTGCTTGGGCGGAGTCTTTTGCAGAAACACAGAGTTCGATGGCTGCGTTTTGCGCTGTTGA  
GAAAAGCAAACTCCCGCTCGCGAGCAGGTTTGTGTAAGTTGATGCTCCTCTGATGTCGAATCTTGAATGTCTATCG  
TCGTTCCACTGGCGATGTTCTGGCATTTGGATGTCACAAAGTCCCTGTGAAATTTTGAGCGACACTGGAAGATGCGAGTTG  
TCTGCTGATTTTTGCGAGAGAGAAAATCTGAAACCCATCGCGGCTACTTACCAAAGATTTTTCTTTGAGCCAAGAAAAAT  
CAGAATTCGAGGGTCTAGCCATTTGACCCGCTTTTTGAGTTGTTTACCTTCTGCTCTACGAGACGAACACAGACGCTG  
TGGCGCCTCCGTCCTCTTATCAAAAAAATCTTTTGGGAAATTTCTCCCATCAATGGCTCTTTTTTTTCGAGAGTT  
TGACCTCATGAGTGAAGAACGCCAGGACGCAACACACTTCCAAAGTCAACAACGATGAAAAATTTCTTTTTGCTTTA  
AATCCAGAGAAAGCTTGCTGTTGCGAGCATTTCCGTCACATTCGTGCGAGGAAAGGAGAACGTCGCGTGGGTTGTTGTTGTT

CTGTTCCACAAAAATTTTATCCATCATCATAGAAAAATATTTAGTCTTGAAAAATTTTATTGTTTCGTATCTTTGTCTCAT  
TTTTCTGATGAAACCCTCTGGAAGTTTCTTCTTGTGCGAGGGTCAATGAATTTCCCGTTTTGATGAAGGATTTTATCT  
CCCTTTCGACGTCAAACAATGGAACACCCCTTCGGAATAGCACATGACAAATATCCCAAAGGAATCCGAGAGCGTCC  
GGATTAGCGCATTCTTCTGGAGTTTGGAGGATATGGAAGAGAAGCTCCAGAAGAGAGTTGTATTGCTTCTTTCCGTC  
TCCAGAGAGTTCTGGACCACAGAGCCAAAAATTCGCCTTCCAATTTTGTATGTGTTGAGGAATTCGCTTTTGTGCT  
CTTTGTCCAGAAGGAATCTGGGAAAGTTCTTCTTGGAAACGAGGCCGATGGCACCCATCTCGTACAAACCCTTTT  
AGCTTTTCTCGAGATACGGAGTCTTGAAGACAATGTCTTGGATAAAAGACCAGGACCAGCGCAATGCGGCGGACATA  
ATATTTCTGCTCGACACCTTTGTCTCGAACAAAGGCTTCTCCAAACCAGGAATGTCGCGCTTTGGCAATATCTTTTGC  
TCGTCGAGAGAACCGCCTCGCGAACCTGTCTCATAGGTTTTCCAGAGGATTTCCGACAGGAGAATGTACTGGGAGAAGCATCCACCTT  
GGAAGGATCAAACCTTCTGTTTTCGGAAGCTGCGAAAGCAAAGATTTCGACCAAGCCTTTCGAGTCTGACAACTT  
CGCAAGAGCATCTGAGCGTTCTCCTAAAAAGCGCGAATTTGTTGCGATCAGGACCAGGAAGATGTTCCGGAAACAGT  
CGAGCGCTTTCGACACTGCGATGCTTCTCCTGGAGTGAACGCTCTGCGGAACACGAGACTCTTTTTCGACACTGAACT  
TTTGATCGAGAAGAGCTGAAGTTTCAGCCAGTTTTTGGATATATTTCCCGTTGTTTTGAACTGACGTCGAGCTGCT  
TTCCAAAGCCTGGAGTCTGCTTCTGATAGTCTCCAAGAAATTTCTTTCGAAAATTTCTGGTCTTTTATCCCTTG  
ACTTTGCTTTTCCAAAGCAGAAAAGCAAAGTCTGTCTTTTTCGTTGGGACTTTCTGGATGCAGAACCTTTCTCTT  
ACCTCTGCGCGATGAGAATCGTCTCTCTTTTTCGAGCGATGCCATGGTTCGACGAAAGACGAGTCTCAGAAGA  
AGCTTCGCTCTCGCCCTTTTCTGCTCATCAAGTCTTCCAAAACTTTGCTTTGCTTTCGGGAGAATTTCTG  
CTTTTCTCTCTCGTTCGATGCGTTCCATCTCAGAGACAAGGAATTTCTGCTCTGTTCTCGGAGCGAGAGAATCT  
CTCGCTCTCTGCGGCTTCGAAAATTTCTCTCCTCAACTCGCTTATTTTTCTCTCTCTCCCGAGAGAGTTGAAGTCT  
TTCCTTTGGATTTCGAAAACGCAATCTTCTCCTTCCGGAAGTTTTCTCGAGTCAACAGTCTTTTGTCTTTGACTT  
CATCAAGAAATTTTTGAAATATCTTCTGACCTTTTTGCAACACAGCGAAATCTCTGTAGACGAGAGGGATGCTGAGACC  
CTCCTCTTCTTGAATTTTTCTGCTCTTCAAACTCGAGAAATTTGGGGATGGAAGACCTTGAATCGGCTTGTCTAT  
GCCTTTCTCTGTGGCGTATCTTTTTTGGCACCTTTCACAAGTTCACGAACTGTCGTAAGGCTTCTCTCTGTAAGT  
AGACTCGCACCTTCTTCCAAATCTTCCAGTTCGACAGTTCGACAGTTCCTATCTCTTTGCTCCTAGACGGCTCTTCT  
GCTTTTCCGACCATTTCCGAACTGCACCTCGTCTCTTGTGTGGTTTTGACTTTTTCTGGGATACTCTCTCGGTCAA  
AACCTTTCCAACTTCTTTTGTGTGGAGGGAGTCCCAAAGTTTCCGCTCAGCAGGAGTATCCGAGCCTGCGCTCG  
CACCTCTTTTGTCTTCCCAAGCGGTTCTGAACCACTCCACAGGAACGACGATGACGTTATATCCGAGTTTCTGA  
AGTCTCGCGCTTGTCTTCCGCTTCTTCTCGCGAGAACGAGGTTCTGCTTTTTTGTAGTCCAGGAATATAGGCGAG  
TTCTTCTCTTTTCTGCTCTGTTCTTCTCGAGCTCAACTTCGAGCTCCCTCTCAAATCTTTTCTCTCTCTCT  
CTTGTCTGCGAGACCTTCTGCTCTCTCGTTTTCGAGCTCTGTTCAAACCTTCTTCTCCGACTCTCTGTTTCGAGA  
TCTCGTTAGATCGTTATATTCGTCGAGTCCATTAATATTTTCTCAGCTTTCGAAAAATCTTTTCGAAGCATAATGG  
GAGAAGACTTGTAGCAACGATTAAGCGCCATCGGTGAGTTTTGTCGGAGCTCTCGCTGAGCTTTTCCGAAAGACAAACCT  
CTCGTTGCTTATGATAAGAGGCTCCAAAAACTGGAGTCAAGAAATAGGTTGCGATGAAGAAGCATTTCCAAGAGTTGA  
AAATTTCTTCCAAGAGAAATGGAGAGAACGTTGGCGACAGGGAATGTCGATGGCATAACAGAAAGACAAAGATTATGTACG  
CGTCAGAGAGCTACATCGCATCGCAATCGAAAGATTTCTCGAGCATGGAAGGACGACACTGTTGTTGTTGACTCATCTG  
AGAAACATTAGAGCGCTCTGTGCTCCGAAAGGCTTCCAAAGGAGGAGGAGGAGGAAACACTTCTCGTCTCCGTTGAGG  
GAAACAGATAGGAAAGAACCTTTCGACAGCGGTAAGATTGACAGGTCAAAATTTTCCGAAAGCAGACGCCAAAGCCA  
TTGCGGAAATTCACCTGTCATGCTCAAGGAGTTCTTCGAGAGTGGAGCCATCGAGAGAAATGGTTCGAGAAATTTGACGGA  
AAGAACTCGATAGGCTTGTTCGCAAGGAGACATCTGTTCCACTTTCGAAAGTGGTTCGAGAAATGCAGTAATAAATAA  
TATATTTAGGAAAGGAAATGGCGGAGCTCAGAAAACAGAAAGAAACACAGGAAACAAAAAGGAGAAAGTTCGATGCTCT  
TGTGTTGCTGGTGGAGGATAAAGCGCATCGCGACTCTCGGGCGCTCGAATATTTCTCGAGAGTTTTCGACTTGTATTG  
TGCCACAAAATTTGTGGCACATCCATTTGGAGCGATAATCTGCTTTTGTCTTCTTGTGGTACAAAACAGAGAGATTT  
TGATAGAGTCTCTGCGCAAGGAGACTTCTGTTCCACTTTCGAAAGTTCGAGCTCGCTTTTTCAAAACATATGGCTG  
TCCACTCTTTGAAAAAAAATTTGAAGAGCTCATCGAGCAAAAGTTTGGGTTTGTCCCTCTCTCTGGAACTTTTCTC  
TATCACCACAAAAGAAATTTGTCTGCGCTTTCGCAACCTCTCTGCGATGAGGATAGAGTATTTTCCAAAACGACAATGC  
CGAGCATGTCGTCGTTGGAGGCGGTTCTTTGCTTGTAAACGCTCCAGGTGTTTTTAAAAAGAGAGATATCTCGGAAGC  
CATATAACAGACGGAAATTTTGTATAATCTGTTGCTACGTTTCGAGCATGGAAGAAACAAAATCTCGGTATCAA  
CATCGGAAGCTCTGTTTCTCGGGGACGTTCCAACTTTTTGACTACATGCACCCCTGGCGTCTTTGCTGCTGTTT  
AAAACTCTGAGAAAATTTTCAGCCCCCTTGTGCTGAACATCAAACCTCAAGGTCGAAGAGTTTGTCTTCAACCTCTT  
CCAAACGAAAGAAAGATTGAGCTGTTTGAATAGGTCATGTGAAAGCGTCGAAAGCGTACAGAGAGATACTCGAGCTGAG  
AGAACTCTAGAGATGCAATGAGGAAAGAAATAATTTTGCATAAATAATTTTACCCGAAACGATCGTCTTATAGGAT  
TTCTTTGACCGAATAATGTCGAGGAAACTCAAACCTCCAGAAAAGAAATCTCTGTCTCATCGTCAACCTTTTTCGCGAGGA  
CGACTCCTTTGTTTCAAAGAAACCCGACTTTGGAGACCTCGGAGACCTTCTATCTCGACATGATCGAAGTGAAGGAGAAA  
CTGCGCCAGGGCTTCTCTGCTCCTCCGAAAAGAAAGAAAGAAACCAAAGAAAGGAAAGAAAGAAAGAAAGAAAGAAAT  
TCTTGTCCACCAGAACGAAAAACAGACGCAAGAAGAGCCGCTGTCGAGCAACCTGGACTCGTTTTTGGAGAAAGAGG  
ATGACGACCTTCTCCGCAAGCGATTTCGGAAGAGAGCCGATGCGCCGACGACAAACGCGCAGAGACCTCCCCAGTT  
GTCGTACCTCCAGTTGCTCTTCCACAAGAAAACAGGACGATGACGACTCAGAAACATCTCTGAAGATGAACGAGAACA  
ACAGGACCCAGAGGAGATTCTGACAGAGGAGCAAAAGGAAAGAAAGAAAGAAAGAAAGAAAGAAAGAAAGAAATTC  
TCAAGAAGAAACATCCACAACATTTGGATACAATCCCTGACTTTGACGAGCACAGCGACATCGTCAATGAGAAGAAAG  
TACCAATGACAGTCAAAGAACTTCAATGGAAGCAAGCTCTTTGAGTACCGCAAAATTTGTGTTTTTTCGGCGGGTGT  
GTTTCGAAGTCTGTGCACAAATCTCTTGGCGTGGACGTGAAAGGATTTCTCAGAAGTCCAAGATATTCACGGTTACGACG  
CTCTGCTTGTCAACTTGGTGAATAATCCTACACAACTTCACTTCTTACTGCTGTTGGAGCTCAGGTTGCTCATCGCC  
TTTGAATGAATGTCGCGATTTTTACATTTTCAAGACGATGCTCATTCGGGTGACGAGCGAGGACGTTCAACATGAT  
ATCGAGGTTGGAGGACAAAAGGTAGCAGATTTCTTGCCTCAGGCAACAGGAAAGAGCAAAAAGAAAGAGACAGAAAGT  
CACCGACAACGAAAAGAGGATGAGAGGCGGACCATCAAAGCAGAGGATGTGAGAAAGATGCTATAGGTAAGAGGAC  
TAAAAATATAAATAATATTTTTTTCAAAATTTTTCACACAGTCTTGTCTTTTGTCAAAGGGTTGCCAGAATAGAGGAA  
CGCTTTGATGAGAGTCTTTGTACGTCGACAACTTTGACAACTTTTTTCTCTGCTCTGCGCAAAAGCAGCGAACC  
TTTTCGCAAGGCTCTCTCAGGCGCTCTGGGACACTCCATGGTCAAGCCGTAGTGTATCTCTGCATCGGAAAGTTCCGGA  
AATTTTATCTTGCATAGACAAAGAGGTTTCGCCACGTTTCGCAATAGCTGTGATGAGCCTGGAACTTTGGAAGCTCT  
GGATTGACGCTTTGTGGACAAACCAAGGACAAATTTCTTCTGTTTTTTCGAAATGATAGCCTATCAACCCGAAAGTTT  
CTGCAAACTTTTTCAAAACCCTTCTGACTTTTTATATATTTTTTACTAGAAACCAACCATGAGGTTCAAAGAAAGAA



ATTTTCTTTGTCTTTCTGTCTATGACCATGGTGTTCGCGTGTCTCCGCTCCGACGATGATAGGAACAACGACGTGGCG  
CGTTTTACTCGGCAAGTCTCACCTTCTCATCTCAAGAACGAGCTCTTTGCGATAACAAAACTATCGCGTTTGACTT  
CGACATACTCCAAAATATTTCCATGTTCTGACCATGTGTGGATGCGAGGAACCCATAACAACCCCTCTTTTCGAGA  
GCAACAAAAGGGAGAAGTTTTGGAGTAGAGATAGCGAACGCCCTCTTTTTCGTCGCAAGGATCTGACAGAAGCGG  
AAGACCGACTCCCACAGTGGATGTAAATCTCTGAGAGCAGAGACTTCTGCTTTGAAGTTTTTACGGTTTTGTCGAGCC  
GAGCAGGAAGAGTAAAGTTTCCAAAGTTTGTATGTGCTCTGGAAGCAGAACGTTTCTGTGAACGGGTCTTTGTGTAA  
CCTGTTGCCAGCACGGTTCCAAGTAGTTTTTGTCTGGGCGAGTGTAGCACGTTCTTCTATTTTAAAGAAAGAGTCTGA  
ACTGAGGTCAACATGTCTCTCCGTGACGACAGAAAATCTGTTGACGCAACAGACTGGACGAATCTCTTTTTCTGA  
CCCTGTCGATGTCAAGAAAGTTGCGAGCCCTTTTGTGAAAAGTTTGGAGCACTTCTCGCTTTGACGAACTTCCCATCTTA  
CTTTTTCTTTGAAACAAAAGAAAATATTTACTGGGCTTTCCGATGAATTGGTCAATCCAAGCAGCCATCGACTTGAC  
TTCATCTCCGCCGCTCTTTCTGGACTTCGACTCCGTTTTTGAAGATGATGAAAGTGGGAGGGGAAAGAAAATTTTCAGAG  
CGTCTTACTCTTGGCGATGCGGGTTCAGCAACATGCACCTTGGCAAAACGACACGTCCTTTTCGCGCGCACGCCCGCTC  
AGTTTCACTAAAATTTGGCAACATGGCACGACAGGGTCCGACCAACTCGCCAAAGCATCAACGACGTAATAATGTGTTGA  
GCGGATAGCTCTAGCAAAGTTGCCGTGAGTCTTTGAGGAACTCTTTTTGCGTTTTGTGCTGTTGCGGTGCTTGGC  
TCATCTTACAGTCAAACGCTCCCTCTTGGAAAATAAAAAAGTTTTTATTGTAATAAAAGAAATCCAGAGAAAGTTTTGT  
CCTTCTTTGTTCTACGAGTTGGAGCAACATGCCTGGCTTTTTGTGTTGACGAACTCGAGGATGTGTTTTCTTTCTT  
GCTCCCGATTCGATGAAAAGTTTGGAGCCCTTTTTGTCTATGTTTTCAAAGCCATCGAAAGAGCAAACTCCAACTGTC  
GAACTGTACTTTTCAAAAACAAAAGAGACAAGCGTCAATCTCCAGAAATATGGCTTTTTCCAGCATGTTTTTGGCT  
CAGAACTCTCAAGAGGAAATAAAGAAAAGAGAGCTCTGCTTTCCGCTGTTTTCTGCTATGTATGCAGCTTCTGGTGT  
CTTGTCCCAAAAAGTAAAGATTTGGATGGAATATCCATCCCTTGTGATGGTCCAACAAGACATTTTTCTGCGAA  
AGATTCATGCTCTTTTTTAACTTCGAATAAACTTTACCTTTCCCTTTTTTCTTCTGGAGGCTGGTTTTTGGCTGTCTT  
TTTTTTTTCTTTTCGTCGGGAAACCTGTCTCGATGAGCTCTCTGTTTTCTCGACAATCTGAATGAACGAGTCAAACG  
CTTTTTCCATGCTTTCTTGTGCTTGGCAGAGACTATGTTTTTCGAGCTTCCAAACACCAATAAACGTTGGTGTGTTTT  
GGTTTTCTCTTTTGAATGATTTTCCAAAGTATTTCTCTCTTTTCGATTTTTATGCTTCTTGACCGCCGTCGCTGACTTTTCAA  
CATCACCTCATACGCAAGTTCATCGGGGACGGAACCTTCTCATTTCTGATGTTCACTTGAGTGTGTTGGTGGTTCAAAC  
TTGAAATTTGACTCTGTCTCTGTAAGGCTCGGAATTCATGACTGTGTTGAGGACCTCTCTGTGATGTTGAAGCAAAC  
GTAAAGTCCACATTCGTCATCACCGTCTCGAGAAAAAGTTTGGGTGCTGTTGCGCTTCTGTTCAAAAACAAAAGAGTCCGG  
TATGTCGAAAATGATTTTCCAAAGATGTTCCAGAGTCCACAGTTTTTCTGACTGTTTCTCCGTCCTGCAACCAAGGAAATTTAA  
TCCCTCGGAATATCATAATGTGGAGTTCTTTCCATCCACCGAGAGAATGCAGGTGACCTGATTGAGAAAATACTTTTTT  
GTTGTTTTGTTCTTGTGCTGCTCGAATAGTACGATGCGCGAAAATTTGTCGCTGTCTGAGGCTCACTATAGAACC  
TTCTTCCGACACAGACTGATGTCTGGAATTCAGACTTTCTTTTCACTTATATTCGCTCTGTCCAGGAAGTCC  
CCGAAAAATGTTCTTGGGTGCAATGTAACGTTTGTGTACGCCATGACCGTCTTGGTCAAAACCTTGAATCTGAGAAC  
TTCATCTCTTTGCTTCATGAAATAAAAAACGGCTTTTTATTTCTTTTCTATACGACTTCCACCTTTTTGTGGTCTTCA  
AAAAAAGTCAACACTAGAAAAGACAAACAGGCAGCAGAGTTCAATAGAATCACTTACGACGTTCTGTCGTTCC  
TTGCTCTGTCTTGTCTTTCGCAAAATCCCATCGCAGCAGAGACAGAAAAGTATATCGCAGAACCAAACTTTTT  
TGGTTCAAACCAAGAGAAAGTTTCCATCTCTTTTGGAACTCTTTGTTGTCAAAACCAAGAAAGTTTTACCGGCTG  
CATAAAGACGCTTGTGAGAGCCAGAGAAAAGCAAGAAAATCTGGAATGTTGTGGGAAGAAATACTCTTCTTTTGC  
TTTTGCTTTCTCGGCAACCAAAAGGAGCAACGAACTCGAAAAAGAGAGCAGATGCAAGGAGACATGTAAGATTTT  
TTTTGTTCAAACAAAGGAAACAAAGAGGACGCTGAGACTCAAACCAACCGCAGAGAGCGAAAAGGGGTGAAGCA  
TGGTTGATGACCCATTTATCTGCTTTTTCCACACTAACAAAAACAGAGGCTTTTTCAGAACAAATAATTTCCGAGG  
ATCAGGCTGTGAGAAATCTTCTATTTTATATAAAATCTCTAAGTAATATGCTACTAAAAGGGGTTCT  
TCCCTTCTGGTCTGTTGGCGGATCACTCTCTGCTGTTGGCTTGTACTTATTTTATTAGCCAAAGTTCTATC  
CAGACCAGGAAGGACACGGGTTACCGCAAGATAATGGAAGCTCTCAAATGGACCGCAGTTTTTACGATCGGCATCTG  
GCTGATTTTCTGGGCTTTCACCTTCTGTAAGACTACAAACAACAGACCATCTGTCTGGGTTAGAGAAAATTTTAA  
AAAAATTTTATAGACACGCTCTGCAACCGGAGGCTACATGTTTCCGACAACCTTCTGTTTTTGGTCTGCGACAACCT  
TTTTGGAAGGGAGCAGGAACCAATAAGTTTTTTCTTGGCAAAAGTCAACAAGAAAGCAAACTTCGATACGGAATCGGC  
TTGGCGGATCAAGCTGAGAATTTTGGCCATCTTTTCTGCTCAAAGTCTCCATCCATCCAGATACGATGACCCCTTCC  
CGAAACGGACGATGACCAACACTCTCTGCAAAAGTCTTTCTTTGAAAAACTGTGCTTCTGTCGATGCTATAACGTC  
AAATCTGCTATTTCAATGCTCTGACGAAAAGAACTTTTGGACTCGAATGCGGACTGGCTCCGAAAAGTTTCAGAGTT  
ATGGGTGAAAAATGCCACAGAACTTCTGGACTTGTCTCGTCTTTTCGACGAGTTGACGTAAGAACTTGAACCGA  
TACTGGAGAAGACTCCAAGTCTTCTCCGAAGCTCTGTTGTTTTCTGACCTCATCGGTCCACAGATTATTTGAGACCG  
GAATGGAATACATGGTTTTCAAGCTTTCTGCTTTGAAATAATATGGCTGAAAAAAATTTTGTGATTGTCGACAAATG  
ACGAGCCTTGTATTGGTGTAGAGAACCAATTTACACGATGTGTTACGCTGTGCTCTAAAAATACCAAAACACAGGGAA  
ACGGGAATTCACGCGGAACGGATGAAGGAACATTTTAGGCTTTACAACCTTCTTCTGACACGGAACGACCACTTTGA  
AACGGAAGGGATTTTTTGGGAAGGGGGTGTGTAAGGCTTATAGAAGACGAGCTTCAAAGAAAGCCCATTTTTTACA  
GGAAGTCTCTGGGACTTTTGAACATAATGTGCATGAAAATAGACGGAAGTCTTTCAAACAATATCTCATCCCTCATTTG  
AGACTTTTGAAAAAATGGGTGGAATTTCTGACGATAGAAGAGTTTTCGCGCAAATTCATGCTCAAAGATACGAAATTT  
CCCAACACCAAAAGACCTATATGATTTGACTGGAAGGATGTCGAAGAGAGAGACATCTAAAGAAAAATATCCAAAG  
ATATTTTTTGAATGTTACTTTTTGGCTTTGTTGCAACAGCGAACCCAGGAGGAATTTTCAGAGACTTTACAGAGTTT  
GACAGAGAGAAAGGAGTCCCTGCAAAAAGATTGTCGAAGGAAAGGAAGGAGACTGTTCCAAAAAATGACGGCTTGGT  
TTTTCTGCGTTCTATCTGACTATTTCTATGTTTGAAGAATCTTCAAAGGGAAGATGCGATCATTCTCTGCTTTCT  
CAAGTTGAGGGCAAGAGTTTGAAAAACCTTGTGGCTCAAGGAAGAACGAATGCGAGAGGATGGCGGAATTTCTAAGCCA  
ACACAACCTTTGTTTTGAAAGGACCGGGTGGTGTGATGTTGCAAGATTTTTTGAATGTTGTTGATGCAAAAAGCTCG  
GATAACCAAGTTGTCAGGACGACCAAAACAAAGGCTTTTCAATTTTCAGATAGCGGAAGAAATTCGCGAAAAGGATTTGGTGAACAA  
TTGGGCTTGTCTAGTGAAACAAAGAAATTTGTGCTTTGATGAGGCTGCTCGAAAAGTTCCACGTCGGCTCTGGAGG  
ACCTCCCACTGAATTTTTCCAGACCAACATCGTTGACCCAGTCACTGCTCACTCTCAATTTTTCTTTTTGTTGTTGTT  
TCGTTCTGTCGAAAAGATGATCTGTACTCGAAATCTTCTTTTCCGAGACATCTTCAAGATTTTTCTTCTTCT  
TCCAAAGAAATATTTCTTTGCTTGGAGACTTGTATCGTTGTAATTTTTCTCTGTCTTTTTTGGAGCGCACAGCCG  
GTCCTCTTCGAAAAGCCAAAGATCGGATGTGACAACTCAAAGAGAAATTTCTGCGGAAACACCAAAATTTTTCTA

AAACTCTCTGAGATGGAAGGAGTAAATCCGCGAAAAATCTCTCTTCAGGCCTCCAGGAACAACCTCCACCCTTTTGCCCT  
TCCATACGGAACCTCGAACCTTTCTCTGTGCGCTCCATTGCTCTCTGGAAATCCAGAACCCTATCTCGGTGGAGGGGA  
AACGAGAACTTGCCTTTCTCTGAAATCTCCATGACCTCGTATCGAACGGAAACACTCCAAAAAGTTTTTGACCCAGC  
TGTCTTGCATGGAACGATAAAGAGGTCGATGCTAAAAGTCCCTCTGACGAAACGACAAATCTCGTCCAATGTCTTGG  
TTGGACAACCTGTTTTCTGCGTCGTAGGCTCCCATATTTCCGTTGATAAAAATAGTATCTCTTGCCTCTTTGAGTTTTG  
TGATGGAACCCATACGTAAGGCATCCCTTTCAACCAGTATCCGACAGAGTCAAAGTCGAGAGACATACACAACATTTTT  
ATTGTCTCAATAAAAAATCAGCGGCATCCCAACAACCGTCCCTTTGACGATACAAATCTCTCTGAAAACTTTTGTCA  
CACTCTTTGCACTCCCAAAGAGCAAACTTTCTCGAGTTTTCTTCACTTGCATGGGGTCTGCTCGTTCTTTTTGACCA  
AAGCTTTGCAATTTCCGCTCGAAGCGAGAGAACGACGGAACACTTTTACAATCTTGGGTGTGCAAAGTCTCTTGCCACA  
TTTTTCAAAAAATATATTTCTGCAAGAATATATTTTTCTTTTTTGAATCAAGAGAAGAACAAGGAATGGCTTTTGCTT  
TCCAACACTTGTATGAAACCCACAGACAAAAAGTTGGCATGCTCTCTTGGGAGTGTGACCCGACCGTCCGAAAGAGT  
TTCTGAAACATGCAAACTTCCAGCTCATACAAAAAGGATTTTTTGTGGATATTGCGAGTCAATTTGTGACTCTTCT  
CAAGAATTTTTTGAACATCCCAAGAAAGCCATGCGTTCTTCAAGCTTTTTTGAAGTCTTACAGAGAGGCGTGAGA  
ATATACTTTTGTGACAAAAGTATTGTAATGGACGCTTGAAGTGGAAAATTTGAGAGAGAGGTTTTTCTCAAGAGGAGC  
AGCGCGCGGAGAGTCAAGAGACAGAGAGTGCAGAGACGAAAAATTCGATGGTCCCTCTTTGAGGCTGAAAACTCCC  
CCTCAAAACCAACACTTCAAGAGTATTTTGGTCTTGTGCAAAAGGACCTTCTTGGTACAGCGATGTGACGCGTTCGG  
CAATCGAAAATCAATGGATGCAACTTTTTGGTCTTGGGTACACAAGTGCCTGAACTTTTCCCAAGAGTCTT  
ACACGGACTATGGAATCCAAGAGGAACAACAGGACAGGAACCTTGTGGAGTAGCGCAGAGGTCGGGAGCGCAATATCTC  
AGCTCTTGCACAAGAACTGGGAAGCAGATATTTGCTCAAAGCACAGAGGATTTTGTCTCTTGGGTGGGTTCCGGACC  
GAATGGGTTGTGTCTCCGAAAAATACAGCTCAAAGAGATGGAATGTTCTACAGCGTCCGAACTTTCCGCTCTCTACA  
ACTTTTCGAATTTGGCGCATACAAACAGTGTATGGGAGCCACAATAAAAAATTTTTTGAATATTTTTATATGCCATGTGCG  
AACAAGACCGAGCCTTTGAGTTCGACTCGACGATGTGCGACAGAGTGTCTTTTTTGCAGACGTTCCCTCTTTTTTGC  
GTTTTTGGGTTGTCTTTATCAGATGGGTCGCGAGAGCATGCTTTCGCTTTTGTATCTTTTTGCTTTTCTATCGCCGA  
TAGTCTATGGACAGCAAACTTCTCTTCTGCTCAAACATTCGAGACTTTCCGTTGGGGCGTATCTTTCTTGGGAGTTCTCC  
CCTTTCTCTGAAATTTTGGATATCTCCATGAGAATTTGAAACAACAAGGAATTTTGCAGAGCTTCTGCAACAGACGC  
CGAGGCCCTTTTGGCGCTGAGATTTGTCTTTACGCGGAAGACGCTGGGTCTTTGCGAGATAGAGTCCAAAGAGAGAC  
TCCGACTCTGTGGCTTCTTCCGCTCTTCCACACCTGCTTTTGTATGTGCGGCAAAATTTCTCTTGCAGCTCTCTGT  
CGCCGTCGTCAGACAAACTTCTCTTCTGCTCAAACATTCGAGACTTTCCGTTGGGGCGTATCTTTCTTGGGAGTGTGCG  
ACGCAGCGGTGCTGACGAGGTCGCAAGAGGATGGACGACCGTTTCTTTCCATCGATGTCCACTCTGTGGATAAAG  
TTTTTGTATTTTCCGAGATGTACTCGAGTTGTTCCAGATGTTGTGAGAGAGAGTTCCGCTCTTGGACGAGAGAGT  
CGCAAGTTCAAAGAGACGATTCGACCTTGTAGTCCAAGGATTCAAACTGCTTTTTGAATTTGGCGAGACTGACCTCGC  
ACAAACCCCTGACTTTTTCTTGTCTGCTTTGAAAAATTTGAACATCAAAACACAGACTCTGTGCTCCCTCTTTTGTCA  
AGAGGAGACAAAACGTAGAAGATGTCTGCGAAATTCCTGCTCTTCTCAAAGATTTTACGAGGTAAGACATCGTT  
CTCTTCTGCGAGATAACAGGGGAAACCCGAAACTGTGAGATGTTGTTCCCTGTCGATGAGATCGCTCAGAACAGCGGA  
GAAGAAGCCTTTCTTTCAAAGTTTTGTCTCAACTTTTCAAACCTTGCCTGACGATTCCTCCAAAAAAGTCAAGAAGT  
TTTTCTTGTATGCTCTCTCTTTTCCAGAGTAGTACATGTCGTACGTTGTCGCGATATTTCTTGTGGGGTATCC  
GTACCTTTCTCTGACCCGAAACGAGGATTTCTGTTTGGCAGAGGAACAACAAGTTCGCAACGTCAAAGTTCGAAA  
CTTCCGAACCGTCTCTGTCGCGGATCCACGTTTCTGCGGTAGTTTAGAGGACAGTTCGATGGCGTTTTGCTTCTATCAGA  
CGAAGAATTTTCGCGGATTTCAAGCCTTTCTTTCTGCTTTTTATATGTCAAAAATCTGGTGCATCAGGAAAGAAA  
TTTTCTCTCTTTGCAATTGACGCGACGTTGGCGGTAGACTTTCGACGTTTCTTTGGGATTTTGAAGGTCGGCATGAGA  
CGAGACGATGGCTCTTGGCATCGCTGTTCTATTTGGGAGATTGCCAATGAGGTGTGAGAACATGGACCTTTCTGACG  
TTTTTGGAGAGTCACTCTTGGAGAGGATTTTGGACGCGATGAGAACCTTGTATTTCTGTCCGTTTTTGTCTTCTGTTG  
AGTGTAGGCTTCAAGAACACTTTGGACTGTGTTTTGTTCCATTCCTCCCTGAAGGACGCAAGGCTCTCAAACCTTTTT  
CTGGGTTCACTGCACCATTTGTTGCTTGTGTTGAGACCAAGAGTTTCAAGATGATGGCGAGAAGGAGCTCCACCAGAA  
CGGACGGATGAACGTAAACAAAGATGAGCTGTTGGGGTCTCCAGAATAGAGTCCACGATCTGTTGAATTTTGGAGCT  
GTACTCTCAAGGTTTTCTTTATCTTTTTGAGATGGCAGGGGATATGCCATAGTTCCCTTTGCTCTTTCTTCTGTCG  
CAAACCTTTCCGAACCTCTTATGCGGTAGAGGTCAAACAGGACCAACTCCCTCTTGTTCGCGCAACGAAAGAGAA  
TCAAGGCCGAATCTGTGGAAGCCACCGCTTTCTTTGACACTTTCTTTGACTTCGAGAGTTTCTGTCTGCTCTTTT  
GACCGCTTTTGTGGTATTCGCTCATTTGCGGACGGGTAGAGACGAATGTTTCCGTCACGGGTCTCGAACTTTCTTTA  
GCGAAGACTTTGTGCTTTTTTCCAGACAGAGAAATTTCTGTTCTACCAAGGCACAGTGGAAACCGATGTCCACTCT  
TTTTGTCTGCGGCTGCGCTCTCAAATAAGAGACCTCCCGCGAAAGGCGTCTCGAGTTTTTTCTTTCTTGGCAA  
AGATAAAGGCGCTCGAACGCCCTTTCTTCAAGGAGTCTTGTGCGAAGGAGGATGAGGTTTCAACGATGCGATG  
CCCAGACTTCTGTTCAAATAGGCGTTCCAGTGAAGGACAATTTTTGAATCTTTATTTATGCAAGAAAGGTGTGCATG  
AATTTGTACACGTTGGATTTTGTCTTTCCCTTGTTTTTTGGGAGCGACTTCGTTCTTCTGTTTCTTGTCCAAGAT  
TTGCACTTCTGTCGATGATAAGCCTCCAGAGTATTTTCTGGCAACAAGTCCAGTTCGATGGCTCCGTCCTCACAA  
AACTTTTTACGACAAGATTATAAAAGTTGTGGGTGTCCAAAATTCGAACCTTTCGCTCTGTCATCTTCAAGGGCGATA  
CGATACGCTTTTTCTGTTGGTCCCAGGAGTTTGGGAAAGGATTTTGAAGCGCACATCGTCAAATCTTTACGAAAAAT  
TTCTTGAAGAATGCTGCTTGAACACCATGGGTTTTTCCATATCTTTGACTGGGAAAAAGCCTCTGAGATGGCGATG  
CAGTGCATGTTGTGACAAAACAATCTTCCGCGAGGTAGTTGTGGTGTCTTTGAACTCAAAGTCGTACACGTATCCG  
TCGTGCTCTTCTCTTCAAGAAAGAGATGGGGACAAACACAAGCTCTTGTGCGAAGTCCGCGAGAGTTCTTCAAGAA  
CAATCTCACGTCGTTTTGCTCGCGCTCTCGAGTTGGGATTTCTCTCCCTGCTCGCACGAAACAGAGAAAGAAGCACT  
GTCTCGCATCGGTATGCTCTCGATGTTTTCTCTTGTGTCGGCAAAAGACAGGAAGATTGCACTCCGAGTTTTTGTGAGAT  
TTTTTGAAGAAATCTGGGTAAGGAAAGGTTCCGATTTCTGAGGTGCTTTTTGTTGTGCGTTTTTGGATGGACTTTGCCGT  
CAGAAGAGGAAAAATGATCTTCTCTTCAAGACGAGAGCGTATCTTCTGTGATTTTTTCAACATTTCCATGGACGGACA  
TCTGAACTCCAAACCTCAAAGCAAGGAGGAAAAATCCAGACAACAGGATCTGTTTTGAAATCTGACGAGGATGCTTCCG  
TCTCCACCCACCGAGAACTTTCAAGAAAGGTAGGATTCGAGGAACCGGATAAACTCTTTTTGTTGCAATTCAGCGAA  
CGGAGACAGGCGCTGCTGAATGTGAAGTCAAACCTGTCAGTGCAGAAACGTTCCAAGTTCAGACCGAAGGCAC  
AACAAAAATGTCTCTCTGAGCCATTTTTCTCATTTGTCGTTTTTGTGGCGAAATTTCTGTTCCGTTGGCGATGTTG  
TTCTCCATCAAAGTTGTTAATAAATCTCAAGAGCATATATCTCCATGCTGGAAAAATGTCCACAAAAATCTGCC  
GTTATCTTTTGCAGAAGGGGTTCTGAGAAAACAGGAGAACTTCCGAGGCCGAAATTTCTGGGTTCTGGTTCTCAAAA  
AGTTTTCCATAAGTTGTGAACCATACAGCAACTCGAGAGGCACTTTTTGGGTTGTCTGTCATCTTAGAGCCTTTGGA

ACAGCCACAAAATTACACTTTGAAAAGTCGTTGGTCCAGCCACGCTCCGTAAGAACCGGGTGGCCCTTTGTCAATTCGAAG  
TTTCGTGCCTCCGGGATTTGTGATGACGTTGAGCCTTTTCGCGAACTCGTTGACGGTAGAGCTTTGAAAATCTGTGAGCGGC  
ACATTTTCTTTGTTTGTTCATCAAAGCTGTGGGTGAAAAGTTTGGAAAGAGGACCTTCCACTCTCTCTTCCGATCA  
ACTTTTGGAGGGCCGACACATAACTTTTCCAAATTCCTTCAATGTCTCTGTATTTGCCATTGACAGAGACGAGAGTGG  
ACCGTGGACACATTTCCGAGAACCAGACCGGTGATACAGAGTGCCTCGCTGTACTCGGTGTGAGGGACACGATCCTCG  
CCATCGCTTTTGGTGGTTGTAGAAATCTTCTTCTTTGTCTTTTCTTTTCGAGCCTGAGCTCAGCGAATTTCTCTTT  
TTCCGCAACTTCTCTGCAATAGAGGGTCTGTGATGTCCGGATAAAAACGGAATAAACTCTCGAGAGGGATTTCCATGTC  
CTTTGTACATTTGGGAAATATTTCCCTTTGAAACATCGTCGAGCACTTTTGTATTTTCTTTGCTCAAGAAAAATAT  
TATCTCTCAGAAATCTTCAAATCTTCTCTCTGTCGAGGAACTTCAATGATCTGTAATGTTATCGATCTATTTGAAAGAA  
TGGGCGACGTTTCAAACCTCTGGTTTTTCCATCCACAAAAGTCCCTTGTCTTTGTTTGGGCGAAAATTTGGCAATGT  
CCACCATGTGATACGCAACAGATGATGTACCTCCGATTTGGTTCGCTCCACAGCAAGAGCGAAGAACGAGAGCT  
TCTCTTTGTTGTGAAGAGCGCTCTTGAACATGTCTGTCAAAGACCAGAAGATTCTCGGTGACTTCGCGGAGAAGAGC  
GTCCGACAGAGTTTCCGTTCTTCTTCTCCACAAAGTCTGAAATCTTCCATCTTCTGTTGCGCCAAAAGCCAAAT  
GTTGTCTTTTCCGACAGTGTGATGAGGACAACTCCAATCTGTGACTCTTCAATCATCAGAGAGAACTTGTGAGG  
GTGGATAGTGAAACTTTGACATTTTGTCTGTGAAAAACAAAATATTTTAAACGACTAAAAGTTCAATAAAATGTCTC  
GCAAATTTTATCAAGAATTTACATGGAGAGCATTTGGAGTGGACAGAGAGAAGTCTCTGAGTGTATGAGGAAGTTACG  
GACCAACAGAAAGATCTCAAACCTTGTGTCTGTCAGAAATTTTTCATGCTTTTCGAAGGTGTCGTCATTTGGGCAAGAT  
AAGCGGTTTCTGCTCTTTTGGAGGATGTGAAAGAATTGCGTTTACAGAGGGATGGGAAGGCCAACATCGACACTTTGTGA  
AAGTCTCGGACATCTCAAACAGGAAAAGGATGGATTTTCAAAGGAGAGGTTTTCGACTCTGACAAAAGTTTTCGGAAG  
TGAAGAAGCGCGGAGTCTTGTAAATTTTCTTTTATGAGCGAAAAGAAAACAGAGCGTAATGTCCGACTTTGCGAGGTT  
TGTCCGATAAAGTTTCTCATTTCTGAGGATCGGTCCAAAGAACAGGAAGAGATGACATCGGAAAAGAACTCCGCAAAAT  
TTCGTGTTGCTTTCACCCACAAAACCTGTGCAAAACCAAGCAAGAACACTATGAGCTCTACGAACTCGTCCGAGACAGT  
CTTTGTGAACGCTGCCATCTCGGATTCATTCGAACGAAAAGGCCAGAGATCACAGACGTCGAGACTCTGACGAGAATAAA  
ACACTATATTCAGTCGAGGTCCTTCCCTTCTTCCCTTCTTCTGTTTCCAAAACGAGATACTTTGAGCACGTCACCGTCGCGAAG  
AGTTTGAAGGACCATTTTGGAAAGGAGCAGAAAGGAGAGGAAAGAGCTCACGACAGAGAACAGAGAGTGTGAGTGTGAC  
ACGAGGCACAAAATTTCAACTCTTGGCGAAGAGGCTCTCCAGAACGAGACGTTTTCGAAAGTTGATGACAGACCTTACGA  
AGCGATGTGCGGTGTCTCTCATCTCTCACGGAAGAGATGACCAAAGTTCGCGGATGGGGTACATCCCGCTTATCAAC  
TCACGAGCAACTTTTGGAAAGGTCGACATTTGAACTGACGTAACGTAACGAGAACATCGTCGATCTGTCACCCCTGTGAAGGAA  
ACGTATCAAAGGTGAGATACCCACAGATTTGAGAGAAAAGAAAATCTGGAATCTTTCTGAACTCGAAGAGAAGGAGAA  
ACTCCAGAGCGAAATTTCAAAGTACAGATCTACGATGTTTTCGAAAAGCAAAAGATCCAGCCATTGAGAAGAAAGCAAG  
TGCTCGCCTTCGGCATTGCAAAGGACGTGAAAAAGCGCGTTTGAAGCGGCAGAAAGAGGTTTCCCGCTCTTCAAAG  
TATGGCCTGTACGAACAAAAGAGCTCATGCGGAAGTAGAGCGTTCAATATTTTTTTCATCGATGAAAAAATATATACATG  
AGGCGAGGGTTTTACTGACCGTACGCGACGTTACAGCCGAAATACCTCTCACCAACAAGCGTTCTGAACGAGAGGGG  
CGGGCGCACAGGAAAAGACGGAATAGCTGGCGCGGCTAAAGTGCATCCACTAAACGCGGGACCGCATCCGGAAGAAAAC  
CGACGCAACCTCCCTGGTGCACCAAGGATCGCCGACGAGACGCGGACCATCGGAGCTGACACTCCAGAACACGAAAC  
GCAAGCGGGCGAAGAAAAGCACTGCAAGAAAATACGAGCACACACGACATTACTTCTATTTGCAAAAAGAAAATTT  
ATTGAGAAAATTTTTTATTTGTGACAAAAGAAAACATGAACTCGAAAATTCGTTGCGTGAAGAAAACAAGGCCTC  
TGGGTTTGGGAGAGTGCCTTACTGTTTTCAAAATCTTTTGTCTCTCACCCCTTTGTCGAGCATTGGTCAGAGAACAA  
CAAAGAACCCCAAATCTTGTGGTCTTGAATCTCGAAAGGTTTCTTTTGGTTCGACTGCGGGCAGAAATCGAAA  
GGAAACCGTTGATGTCTCAAGAGGGGCTCTTCTTGTCTCTTTGCAAAGCGAGAAAATTTGTGGCTCTCCCTCTTGT  
GAAGCTGTAAACAGATTTCTTTTGTCTCTCACGAAAAGCGCAGTGTGGTCCGAGAAAGACGATTCTCCCCGAAAC  
GGTCACTCAAACCATTCGAAAAATGTGGTTCGAATGCCCAATGTTCCCACTCTTTCCAACAAGAGCCGAGAGTCTG  
TCTGTCTCCAGACAACTTCCAAAGGAAACGTTGGTGCCTTATTGCGCAATCAGAAAAAATGCGAAGACGAGGTTGT  
GAGCACTGTCTAAAAAGTCTTTGTGTTTTCTTCTCCGTCCTTTCTGTTGAGTAAACGGAATCTGTCTGTCAAAAGGCA  
AGTCTCTGCGGGAAGTAAAAGAAAACATTTGTTTGTGTAACAAAATTTGTTCCGACTCTTCCAATGCGCCCTGTTGCA  
TCACGACCAAAAACAAGGGTGTCTTATTTGTGCAACAAAAGATGCGAAGATGATACTTGGCGTCAATGTTTCAA  
AATCATTTGCTTCCCAATCTTTCGAACTCTGAGCAACAAAATATAAAGACCCCAAGACAGGTGTCCTTTGCGG  
AGGAAAAGTTACCTTTTGAATGCGATGTGTGTTGACAGGTTTTCAATGGAGCTCCGTAACATCAACGAGGCAAA  
GATGTCCTTACTGCGCTTCCAGAGCTCTGCGATTCCAAAGATTGTAATAATGTTGTTGAAAGGCTGTTGCTGCTCTT  
CCACAATCTTCTTTTGTGATCGAAGAACGAAAAGAGTCCAAGCAAGTCAAGAAAGGTTCCGGAAGAAAATACAAGTT  
CCAAATGTGAGAAGAAACATCTTTTTCGAGACACCCCTCGTAACGTCAGGGCAGGCTCTTGGTCTCCCTCTGCAAAATCCA  
AAACGAGGCAAGGCTCTTCTCTGCTCTATCACCCCTCTCGCTGTTTCAAGCGAGATTTTCAATGGTGTATC  
AACCAGAAAACAGGAAAGGTTCTTCTTTCGACATCTGCGTTGCGGACAAGTTTCAATGTCGAGATCGACGGAAGACAGCA  
TTTCGAGCAAGTCTCAAACCTGACACCTCCAGAAGAGACACAGGAAAGGATAAACTCAAAGAAAGAACTTGAAGAAAC  
ACGATTCCAAATCTTCCGCTTTCGCAACGAGACGTTTGGGAAAGTCTCTGATTGGAAGAACAGATAAAAGAGTTT  
ATCAAAGAAATATTTTAGACACAGACAAAATATTTGAGAGATGGAGAAATTTATAGGATGAGAGAGCTTGTGCTCTG  
TGTTGTTCCAAAGGAGAAAATTTCCAAACCCCAAAGATTACGCTTGTGTTACTATGACAAAAAACGGCAAACTTTGG  
GACGATGTTACAGACGAGGAGCTTTTCAATGACCTTTTACCAAGTTTTTACGAAAATTTACGAAAGTACACAAACACTATAAC  
GAGGAGTAAAGCATGGGCTTGGTCAAATCTCAAAGAGGGCGGGTGTGATGGAACCTTTGTGGATGGGAAGCCAGAA  
GGAGAAATTTATCATATCTCAGAGAGTGGAAATCCCGTCAAGCGCTTGGCCAAAAGAAATTTGAACTTCCACATCTCTGT  
GTTTTACGAGAAAGGAAAGGAGTAAAGCACGTCACAACTCTGGGATTTTTGCCCCTTTGAGTGTAGTTTTTGGGGA  
TGACCTTTCGAGAACTCTATACAGTAGACTGGACACTTTTCCAGAAATTTGGTTCAAAGTTACACAAACACTATAAC  
CTCGAAGGAAGATTGACGATATGGAGAAAGGCTGCCACGATGGAATCTCTATGGTGTGTTGAGTGTGCTGCCAGG  
AGAAGCCAGAAAGCTCAGTCCGTTCAAAGGAAAGGAAATTTGATTTGCTCTGAGATATTAAGAAAAAAGAAATG  
CGTCAAACCATCGCAAGATACAGACTTTGCGAGATTTTCTCGCGAACGCTCCATACGATCTCAAGCGGATGTGTTT  
TTTTGAAATGAAAGGTAAGAAACAGTAAATATTTTATTTCTGAAATAAAATATTTCTAACGAAAGTCTCAGGCAAGGTGG  
AGTGGATCTTTTTTGGACATGTAATCGGCAAGGTTCTCCATCTTCTAGCTGCTTCCAGCGAAGATAAGTCTGTTGTT  
GTCGCGGCGAAATCTTCTTGTCTTGGATCTTTGCTTCAAGCTTTCGATGGTGTCTGAGGTTTCCACGCTTAAACGTT  
ATCGTCTTGGCCGTAAGGTTTTTATGAACTTGCATTTATGTTTACTTACCCGCTGTTTAAATATTTTATTCGAA  
TAAATATTTGATGTTCTGTGGAGAAATCTCTCGAAAAGAGACGAGTTTGTGTTCTTACAAAAGATGAGAGTGCAG  
TGTTGTACCTTGTTCACGACAAGCAGCAACTTTTTCAAAGTCTTTCCGCTTCTGCTTCTTCTCCCTCCACAAACCA

CCAAAGGTCCAACCTTGACTTTACCTCGACGAGAAGATTTTTGAAGGGATGAAAATATCTGGATGATACATGTGGCTCTT  
TCCTTGAAAATATAGAGAAATTTAATGTCTTGTCTCGAAGGGGAGAGAAATACCTTGTTCTGCTATTCCTCATCAAGAA  
GGAGTTGAAGAGCGAGGGGTTCAAAGCCTTGGCAGATGAAGGGTGTCCAGAAGGCATTAGAAACTCTTTTTGCGAAAG  
GAAGATTTGAGAAATTTGCGAGCGACTTCGGGGTTTTGAGAAGGATGGTCGTAGCCGGTTTTGGCTTTGTACGTTTTTTG  
AGACTTCTCCCAAGTCTCTTTGAGTTTCATGGGGTTGGACACACCATATTTTTTCATACATGTCTCCTTGCAATTTTTGT  
TCGCGTTTTCAAGTTTTCTGGCTTCCCTTGTATCTTTTCATCCACAGATTTTTTGTGGTTTTGTGACTTCCCTCATT  
TTCATGGGGTTGGTCGAACCGTGGCGCTCCAAATTAGTGATTTCCCTTTCTGCTTAGTTTTTCTTTATCTTCGATGCT  
TTTTTTGGAATGGCTTCTTTGAATTTATTTTTGACGGTTTCGCATTTTCATGGGGTTGGCGAACCCCATATTTTTGTATGT  
GATAGCGCTTGTTTTTCTGTAATCTCATCACTTTCCATCGGTTGTGTGACGCCATGATTTTCAAAGAGAGTCTTTTTG  
CATTTTTTCTGGATTTCCGGATTTCCCAAAGGACTGTCTGACCCCATTTTTCTTTCCATCCTTTGATTATTTTTTCCCT  
TATTTCTGGGGATTGCAAGGGAGTTGTACTACCATATTTTTCCAAGCAAGTTTTTTTGACTCCTTCGGCTTTACATGAAG  
GGCATCCATACCATTTCTCAGCTCTCAGGGTATATCGATGCAACGACGGATTTCTCCCAAGAAACAAATAAATCC  
AGTTTTGCTGTGCTTTTTTATATTTCTGTGCAAGGGCAGACATCTTTGCGCAAAAAGAGGTTACTTGCTTCTCATGGGT  
CATTTTTACCCTCTTTTTTCTTATGCATTTCTGGCATCCGGTGAAGGCTTTGTGGTGAGTCTAGAGTAAGACGTGGTTC  
CCTCTTCTCCACAAAACACTGAAAAGTCAATTTGCAGTTTCAACCTCCGTAATTTGCTGAGAAGTTGCAACCTTCTTT  
TCGAAAATAAGAGCAACTTCTTCTGGGTTTTCTGGGAGGCATTTATTTCTTTGGGTAACAAAGAAATATTTGTTT  
GATAGCGCTTGTATTTCGAGGGTCCGCAATGAAAAGGCCCAATTTCTCAGGCATACCTTGGAAGTTTCCGGATGAT  
AGGCAGCGTGACCCACCATTTGAGGGGCATTTGCTTTTTGCTCATAACCGTACTTGTACATAAAAGAATTGCCTGGAACG  
AATCCAGCGTGCGAATATGCTCGGGATCAGTGAGCGTGTCAAGCCCTCCCTCTTCGCGCTTTCCCATCACACTCCAC  
TCTGCAACCTCCGAAAACAAGAACACAATCGCAACAACCGCCACGATTAGGACGATGGTAAGAAGCCGACAGTCACTCA  
TTACACTCGAAAATAATTTTCAACAACAAGAAAATAATTTTCAAAGGAAGATATTTTTCTTGAAGCATAAATGGCG  
TCGAAAATAAAAGAGCAGTAAAAGAAGCGTCCCTTTCTCAGAAGAGACAAAGGAAGCTTCTCTGAAGCTCTCGACAA  
ACAAATTTCTCAGCTCCGAGAACAATCCAAAATAATGGTACATTTGCCACAGAAACAGAAATAATCTTTGCTCCTCTCC  
ACTCTAAAATAATCATGTGTCCGATACCGCGAATCTGAAAGCTGGAAGTCCGAGTTCGAGGAGAGAGAATAAATATTTCTT  
AGTTAAGAAATATTTGGAATGAGGGACCGAAAACCTTCCAACTTTCTGCTCGATGTTGAGACTGTTGCTTTTCGATG  
TTTGGCGAAACTATAAAGTCTTCTGTTCTCTCTGCTCGCCATTTATTTTGACATTTCTGTTCAGGCGCAAAAGGTC  
ACAGATTCATAGAAGACATCATGAATCTCGAGCGAGACAAAATATCGTAAACAAGACAAAATTTCTTCTCCGATACA  
ACCGCAGTCTCTGACTGGAGATTTCTTTCAGGGAGTGGACAAAGCGCTCCCTCTCCTTCCGCTGAACATCAATCCGT  
CGCGAAACAAAAGTCTCTGGGACATTTTTTATTTTTGTTGAATAAAAAATATTTATGATTGACTAGAGCGTGTAAAGTTC  
GTTCTGGACCTTTGGACTGGGTCTTAAACATCGCATTTGCTCCGCTGCTGCTGCTCTGAAAAACCTTGTCTTGTGTGG  
CGAGTTGTTCTGGAGCTGGAGCTTTGTTTCATGAGACGAACAGCGAGCATTTCCAAAGCGACCATCCCAAGAGCGCGCA  
ACTCCAACGACTCGCCCAATCACAGCTCCGACACAATTTCCGCAAGTCTGTCGCGGAGTGAGACCTCCACCTCCCTCCGTC  
TGTGCAACAGTAGTTGTTTGAAGACAGTGGAAAGGATGGCGCTCTCGTGTGCTGGACGGAAAAACATCGGACAGTG  
CATTGAAAGAAACCAAAACACTCTGTTGCTGATTTGCTCAGGAACTCAGAGTCTGTAATAACAGCGCAACGCAAG  
ACCAGTCTTTCTGCTCTCGAAAATTTCTTCCATAGACAAAACAAGAAACCTTCCAAAGCCAGTCTCTCGAAAAC  
TTCCAAAGATCTTTGAGAAGAGAGGGTTTTCGTTGCTGTTTTGAAAAGTTCCGCTCACTGATATCTTCCAGAGAAAT  
CCTGGAGACAGGTCCATAAACTAGAGGAGTTTGGCAAGGGGAGAGCTCGTGGATGGAGTTGGAGACGCAAGGAGTT  
TGTGTTGGGAGAAGGAGAAAGTGTGGAATCGGAGTGGTCTTGGAGAAACTGACCTCGTAGGAGATGCCAAGGGACTTCT  
CGAAACGCTCGGAGACAAAGCGGAGAAAACGGAAGAGAGGACTCGTGTGTTGGGTTGGAAGAAGCGCTTCTTGGGGAG  
AAGGAGAAACAGGGGAAGCGTTCCGCTAGGAGTGGACGAGGGTGTCTCGAAGGTGTCGGGCTTTGGGCTTTTCTGACT  
TGCGATGGAGAGGAGTTCTTGTGAGACTTTTTGACTTTGATGGTGTGGGAGAAGGACTCTTGTGACCTGTGATGGAGA  
GGGAGATTTTGAAGGGGAAGCGTTCTCGAAGGGGACCTTGTCCGCGTTGGGAAACAGGAGAGGGCGTCCGACGAAGCG  
TCGGGGAGGACTTTGTGAAACGAGAAAATTTGTGGGAGTGCAGACACCATCGAAGGAGAGGAGTTCTTGAAGGAGAAAG  
GAGGGAGAATTAGAAGGTGTTGGAGATGCGCTTTTCGATGTTGAAACGAAGGTGAACTTGAGCTTGTGGGATTTGGGA  
GTTTTGTTGGGGAAGGAGACGCGCTTCTCGAAGGAGAAGGAGAAGGCGAGGGGAAGCAATACGCGGAAAAACAAACTTCCA  
CAGCCACCGTACCCTTCCGCTGTTGCGATTTCTGAAACCCTGGTGTGTTTATACCCAAAATTTCCGCTCTTTTAGAA  
CTATCGTATGCTGGTCCACGACGAGAAATGAAAAGAGACAGACAGACTGTCTGCTGAAAAACTAAAGTTGTTGCTCCA  
GCTGTACGACGCGACCGAATGTCTGCGTATAGAGTCCGAAAAGTTGAGAGGACACAGAGGAAGAAGTACTGGATTTCTTT  
GCAATGAACAGCAACACTCGAGTTTGTGAAAGAGACAAAGAAATCCGAAATGACCTGTCCGCAAGGGGAGAGCAAAAGC  
AGATCGTCAAGATTTTTGTCATCGTGTGTTTTCTTTCTCTGTACAAAAGAAAATTCGTTTGAACATAAAATATTCAC  
CAGATTTTTACGACGCGCTGTCTCTCTCGCTATTTTTGACGTTTCTTTCTTTGTCGCAAAAGAGGAAAGATTTCTTT  
TACGCTCGGGAGCAGAGTGTGTCGGCGACAAAGGAAAGACCATCGCTAACGTGAAGAGGACCGAACGTTTTGTTGCTTT  
TTCTCGACATCTTACCAGATTTTACAGTTCTCTGGGCTTCTGTCTACCACAAAACACTCGCAAAAGTGTCTCGAAATCT  
GTGTCTTCGAAACAGACAGAAACCTTTCTCTTTCTTTTACGATCACATTTGTGGTTTTGGGGAGCTCCAGAAATATTC  
CATCGACGAGCTTCGACAGCAGCAGACTGTCTACTTTTCGCTTTCATGGTTCTGAAAGGAATCTGCATTGGTACATATT  
CCGACGAGTTTCTGGAGAACTGTCCAGAAAATGCAAGAGCTGACAGAGAACGGAAGGAGTGTGCTGCGTTCAACA  
ACATAGTTTCTCAATGGTTCTACAAGAGAAAATTTCAATTCGTTGCAAGAGTACAGTCCGCCATTTCTGCATCACACCG  
AGTGCACTTACAACGCGACGGAACCTGCTGGGTATGCTCTCTCAATAAATTTTATCAAAGAAAATTTATACAGACGCTCGC  
GGTCATGGGCTTCCAAAGCTTGAATATATCCGCCAGCTTGTGAGTGGCAAGTTCTGTGGCGAGAGGTGAAAATGTACAAA  
GAACTGCGCGGATGACAAGGAAAACCTCCACACAGAGATGATGGCGGAAATCATGGCGTATTTATGGGCGAGTTTCGCG  
AAGCTGTCTGTGTTGACAGCTGCTCTTTTTACATCGTTTTCGCGCATCGCTCCAAACACGAGGTTCAAAGAGACAAG  
GACGACTGTGGCGACCAAAAAGAAATCACAGAAAAGGCGACACCATGTTACAATGTTTTTATCAAAGAAAATTTATCAAG  
GTTCTATCTAGTTTTTTGAGAGCTCTGAACTTCAGCGAGCAAGAGAGAGATGAGAGAAAGATGCCTTATTTCCACAGCC  
TCTCTTTTTGCGTTTTTTGACCAAGTTCTGGGAAAACCTTCTCAAATTCAGATGGAACGACACCATAGTCTTTTATCCC  
TCCAAGTTCGTAAGTTTTACAGAGATATTTGGAGTTTCTCCGATTCGAGCTCAAGCTCCCTCGCGTTCTCCATTACAA  
TCTCTTTGAAACAAAAGAAATTTCACTCTCTTCCATCCATGCAAGATGTAAGTTGTACCTTTTTCGAGATTTCTTCT  
TTTGAAGACAGTGTGCCAAACTTGCTGCATCCCTGGCAGCATACAAGGACGTTCCACTTCCAGCGATATTGTTTT  
TTTGTGTTTTGTTGCTTTTATCAGCCTCAAACAAAAGTCCCTTCTCGCCCCAACGAAAACAGACAAATGGGATAGCCTA  
CTGCGAGTCCCTTTCTTGTCCGAATGCCAACCGATGTAGTGGTCTCCGTTACAGTATTTGTTGACCAACACATAGTTT  
GGAGGAGGGTGTCTTTCTCCATCACCCCTTTATCGACGAGGTGAGCGTGAAGTCTCAGCGCAACTTCTCGATAAAGG  
AGGCCACACTTTTGAGGGATTTGACGCTGTGAAGCCATACGAAAGATTTTCCGTTCTTCCAAAGCCACCTGAAGCC

TTGGAATCGGGATGACTTTGCCATGCAATTTAATGGCTGTGTCTCTGGCGGAAGATATTCCACCTCTTCGAGCTGCCTT  
TGCAACTTTTTCCCTTGAGCCAAAGAGAAATCTCTCAGAATAAAAAATGGGAGGTTCCATTGCGAATTTATATTTTTATAA  
ATTCTGTCTATATCTTGAATTTGCAACAAAAACATTTTGTCAAAGGGGCAGTTCCCCCAGGAAATACCTCATTTAAACA  
AGTTCCAAATCTCTGAGCTGTCTGTGCGTCCGGCGCTCCGTCTCGAACACGATACCCAAGGGTGATGTGAAAATTTGACGG  
CTTGTCTTCGACACCTGACGCTCTCGATATTTTATCTCTGAGCCCGTCACTCGCTCCACGACACTTCTAGACCGAGCGTTC  
CGTTTTGTCCAATAGATCGCAACAGAGAACATCTTGTCTTCGAGAAGCGTCCGATACAGAGGAAATATTTCTTAGGACG  
CTGGAATGTCCAAAGAAAAACAGTCAAATTTTTCTTTGTTTGGCTTTCTTTGGGACGACAAGGTCAAAAACGTGCAT  
GTGATAACTTTTCGAAAGGAGAGGAGAGAAAACTCGAAAGACCAGAAAGTTCTCAGATGGTCTCCACCTTTTCGCAGA  
GACACCTTTCACAAAACGCAACGTCTCAGTCTCAAAAGAGGGCAGGTACTTTCCAGAGTTTGAGAGCTTCTCATCTTT  
TCTTTTTCAACAAAAGAAAATTACGAATTTTCGAAAAGCATCGAGACGCCGAGTTTTCTCTTTCCGGATCGGGAAGCAA  
CCACCTTCGAGCGTCTCCTTCTTTCGTCAACAAGCGTTTGGCTGAAACCTCCATCGAGAGAAAAGCATGCAAAACAT  
TCCCTCCAAAGAAAAGTTTCGATGGCCTTGGCAACTTGCACCTGTCTCCGTTCCGAGCGCATCGTATCCTCTCCCTCAAAG  
AAAAGAACCCAAAATCCATCTTCAAAGAACCATGTGTGAAATTTGAAATTTGCACCTGTCTTTGGCCGT  
CGGGAACTGCGTTTTCTCTTGTTCAGAGAACCACATTTTGTGTTTTTGTGCTCAAACACTTTGTACTTTCTCCGT  
CCTGAAGGGAAAACCTCAGAGTTTATGATCGTGTTCGTCAAACACCTCTTCCCTCCCGAGATCAGGATGGGTCCAGAA  
CAGAAGCATGGTCTGATGTCTGCTCTCTGCGATGACGGTCTGAGAGAACTCGAGAGTTTCTCTTCCCTCTGT  
GACACACGAAAGGGGACAGATCTCAGCTGTGTCTTTCTTCAAACCTGGAAGTCTTTCCATCCCGAGTTCCCGCCCT  
TGACCGTACAGCGACAAACCAATCCCTGTAAGGAGGAGGGACAGGCAGAGTCTGTTCTGATTTGCTCGTCCCATCAAAG  
TAGTAGCCGATGGGAGAACTACTCTTTCCCTCAAACCTGGAGTCAACGAGTTTGGCATGTTTTGTTGAACAACGAAATA  
ACCTCATTTGACGCAAAAGGGCGCACTCCCATCAAAGACATTTTGTGATTTTGTGTTGAGTCTTTCCCTGTGGACA  
GAGAACACCTTGCCTTTCGAAAGACCAGAAAGGAGCATCTAACCGTGGCATCGGGCGTCCCAAGTTTTTTCAGAG  
GGACTTTTAAAGTTCAAAGTCTTTGGTACTGTTGTACACGAAAATGTCTGATATTTCTGTTGAATATTTGGAAAAAG  
AGGCTTTGAAAAATAGAACACACTTCGGAACCGTACGTCTCGAATTTCTTCTGCAAAGGGAAACGACCTGCGCCAAAC  
AAGGACAGCGGATGTGATTTTCGGCAAAGGAACTCTTGGTCTGTTGTTGAGAGAAAGTTTCCGACATCTCTCGTT  
TTCTTTCTGTTTTTATCCAGATATAACCTCTCCAAAAGTTTCACTGTCTTTCCCTCCACACATTTCTTTGAATATCT  
TAGAATCTCTGAGCGGAAATTTGTCTCTGTGTTTGTGAGATTGCACTCTCGGTTGGGGACGTTGAGAACGACGATGGTGG  
AGGGCTGTCCAAATAGCAGAGAGTTGTGCTTCTGAAGTCTCTCGAGTTTTTTTGTGAAAACATGGAATGTTCTTCT  
CTGAAATTTACGGATGGAAGCGAGGAACTCACAGCTTCCGTGGAAAGTTTGTAGAGAAAGTTTCCGACATCTCTCGTT  
GAACCAAATCTCTGGGCTTCTTCTGGGTTGAAGCTCTTCTTACAGCCTCTGCTTTCTTTGCGAACGCTCTCTGTATGG  
AGTTCTCGTTGATGCCAAAGGCAAGAAGGGTCCGCTTCTGTCATCTAGAGCCCTCCGTGAGAACAACTCCCGGATAC  
ATTCCAAAGAAATTTTTTCAAGTCAAACAAAATGTTCAAAGAAAAAGATGGCTTCGAAATTTTTCAAACCTGTCT  
GTTCCAAAGAGCTCTCTTTGACCTGTTTGCATTTTCAAAAATTTTGGCTTCTGTTGAGACAGCAAAGTCTCTCTTTGA  
GCTCTGGGTATAGGGCACCAGAACTTTTCGAGAACCTGACCCTGTGAGTCCATAGTCGATGACTTTCCGATTTTTGCTG  
TTGTTCTGGATGACAAAGAAATTTCTGTGGGAGTTCTCCACAATGAACTCTGCTCTGCCACCGTTTCCCATCATA  
AAGTTACGCTCTTTCTCATCTGTCTGTTGGAGGCTTACGCTCTTCAACAGCAGTTGTCCGGATGAAGTCTGCAATGGT  
AAAACTCGATGAGAGACTTTGCTGTCTCAAGGTTCTCGAAACAAAAGAGCGAAAAATGCAAGATAGTCGCCACAGAAAA  
CCGAAATTTCTCTTTTGTCTGACGAGTTTTCGAAAGCTCTGCCCGACGATTCATCAACACAGTGGCCGTGACTT  
TCGCTGTTCTCTCACAGAAATCCGTCCCAAACACTTTTGAAAAAAAGGGAGAACTCCAAAGTTCGAAAAGATTCGACA  
AAAAGTTCGAAACTATGGCTTACAGAGGGTCTGTCAAACAAGAGTCTTTTGTGCTGTTGCAAAATAGGGGCTG  
GCTCTGCTTGTGAGTTCTTTGGCAAACGAGAAACCAATAAATCTCCATCCGCTTCTGTTGGAACTTATCTG  
CTTCAATCTAAATTTTTTGCCTGAAGTCTGTTGGGAAACCGGGGATAGAAAATCTCCGGCTCCCTGTGTCTCGAAAGACA  
CCTCGTCTTTTTTGCAAAATCCCTCGACCGAACAAAGGTTGGACGAGATTGCAAAAAGCCAGTCTCTTTTAGTT  
TCGACGTTCAAATTAACGGGAAAGGGGAAACAGTGTCTCCAAAGCTTTTTTCGAGTCTGTTCAAGTCTGAGGTC  
CTCAAAGCAGTGTGAGCTCAAGGTCGATTTATCTGCTCCATTACAAGGAAAGAAAAGATGTGATTTTTCTTTCAA  
GACAAAATTTGGCTTTTATGGGTGTTCCATGCCGTGGAAGTGTTTGGCACTCAATGTCAAGTTTTTCACAAAGTTGCGGA  
TAAAGAGAAAAATGGAGCTCTGGTTATCAATGCCACAATCTGTAATAATGCCATAGTTTCCGTGCTGCTTTCAATATA  
GAGTCCAAAGTTCAAATTTTTTGGGAGCGATGCTTATGCTTCAAAATCTGAAATTTTCAAGATTTTCTATCGAATA  
TAAGGTTCTCCATTTTGAACCTCTCTTTTTCTTTGCTTTTTCGGTTGGCCCATCGTACGAAACGGCATACTTTGTT  
CTGCTTCCCATGAGGAAATAGACTTTTCAACCTTGAACGTAAGTAGAGACTCCGTTTGGCCCTTCAAATAGGGGT  
CGAAACACTTTTTGTGCCGATTTCCGCCACTCGTCGCAATCCAGTTCATTTTTCTCTCTCGCCAAAGCGGACAG  
CCTTTTCCGTAACAAGTCTGAAGTGTCTCTTGGTTTTGAAGGGCATCTTACAAAATATTTTATAAAATATTTTATGAC  
CAGTTCCCTCCAGACATTTGTTCTAGTTTTCTTCCCGAAGGTGAGGTTCACTTCTTTTCCACAACTGCGGAAT  
TGCAGATTGGGAAGTGTACGATTTCCCTTGTTCGGTTCAAGAGTTGTTTGGAGAAAAATTTGTTGTTCTCTCAGCGTTT  
CTTTGACAGGATTTTCTTCTTGTGCTGAGTCCGGGATGTGGACACTCTATTCGCGAGCTGGCAGGCCCTGCTAGAAATG  
TCTGGATTTCAAATTTCCATCGCTTTCTTCCCGTGTGGTGTGTTGTTGGATGACTCTCTGTTTGTGATTTATATTTCT  
CTCTGAAAGTTTTTCGAGGGGCTGCGACCTTCCAGAGCCGACAGAGATGGTGTGTTTTTTGTTGGAGGAAAACGTCAG  
GACTTTCTGCGTTGAGCTTAAACCAAATTTCTTCTCGCATCCGCAAGACTGAAGGGTTTTGTTGAGAGGTTGAAGT  
TCTGTCTCCGGTCCGTTTTGTGCTTGAACGGGTTCCAAGACCGGACAGCGGAAAACCTGAAGGTTATGAAGTCAAG  
TTCGACATCAGGCTGTGTGCGTGAATGTTGTAACCATTTCTTTCTCGCATCTGCGAAAAAGAGGGGTTTTCTTTTGA  
CGAGTTCAATGTCCGATTTCCCATCGAACTGTTTCTCTCAAACAAAAGTTTTTCCAGCACCTGCAAAAACAGATGGG  
TTGTGCTCTCGAGTTCTGGCTTTGGCTTTCTTGTGTAACGAGAGGGGATTGAGCTGTTTCTTCAAGGCTGAACAGC  
TCCCTTATTTCTGAGTGTGACCTCCCATCAAATCTTTCGAATGTTTGGGTTGAAAGCGCATTCGTTGCAAAAAGAACAG  
GAGTGTTTTTTGGAGCTTCAAGCAAAATTTGGGACGTTTCTGGCTCAAGTCAACAATGACATCGGGCTGAGGTTCTGTC  
ACCCTATGGAAAAATGTCCGTTTATGCTGTCTGCGCATCTCTGCTGTTTTATGTACCGAAGTCCCTCCACAGAGATCGG  
ATTCATGTTTGAAGGAAATGGAAGGTTGTTCCGATATTCGTTGGTGGTTCGAGGCAACCTCGAAAGGGGAAACAGGT  
CATCTCTGTCGATGAGAGGAGGACGGAATTTTTTATTGACTTTGAAAGTGTAGCTTCTTTGACCGTACTGAGTTTTGTT  
CTGTCTTTGCGACTGCGAGAATCGTTCCGTGATGAGATAGGATTTCTCTGCATTTGCAAGATGATGTCTCTGGATT  
CACAGACCAGCTTTGCCAGTTCAACAAACCTCGGAGGGTCTTTTTGATACAAGGCTGGATCGGCCCTTCGATGGGGT  
TCAGAGTTGCTTCTGTCTGATGCAATTAAGTACTGATGCTTTTTTACGAAAAGAGAGAGAAATAAAAATTTTATCCA  
AATATAAAATTTACCAAAAAGCTCCACAAAAGTTTGTGGTTCTGCTCTTTTCAAGAACTCTCCCGCTCCACCCCA  
CAACGATACGTCAATCTCGAAAACCTTTGGTTGCTTCCACACATTTCTTGTCTGTTTTCTTCGATGAGCAAGGC

TCTGCTGTTTTTCATACGTGGCGCACTTGGCCTTGCATTCTGAAAAGATTTCTTTCTCGACCTGCAATATGCACAGGTAGT  
TTGGTGTTCCTCCCGCACTTTTGTGGAGTTCAGACCTCGTGCCTGTTCTCTGCACAACTCTGTAATTTGTTTGGCGA  
AACATTTTATGTTTTATTTCTGAAAACATAAAGGGTCGCTCGTTTTGACTTGGCAATGATGAGCAAACGTCATCAAAGAT  
GGAGTGTCTAACCCAGGAATCGCGGAACGACAGCACGTGGAACTTACACTCGACGGCATGATATGGATCGTTCGTTCCGTC  
GAATCGTCTCTTATCAGAGAGTATGTTGATCCCTGTCCGACGTTGAGTTGGCCGAGGTAACGAACCTGAACTCCGCTCTTT  
GTTAGTTCGCGCAACCCAACTTTGCATACGGAGAATAAAAAATGGGAGGAAGCTTCACAAAAAGTTCCGAGCTTCCGA  
GACTCTCCAGTCTCCTGAAAGGTCCTCCACGAGAATCTCAAAGTTGCAAGGTTGATGGAAGGAATCCACTTGAAAAA  
ATCATACGAGTTCGATCCAAAGTCGAGAGCGTTGGCCGGAATGCCACTCTGTGCTGTTAAAATAGATCATGCGATCAGC  
CATCGTTACCCCAAGACTTTGGGAGAAAAAATTTTGAATGTTTTCAGAAAGACAGAGATTTGGCGCTCCATCGCTCTA  
CAGAATTTTTCGAAAAGCTTCGTACACGCTGCATGCTCGAGGTCCTCCCTTTGGGTCGACAGAAAAGAGCGTCCAAAAA  
TCTGCGGAAGTTTATACTTTCCTTTTGAAGAAAAATTTCTTGAAGATTTTGGAGCACCAAAGGACGAAAGTCCCTT  
ATCGGAGGGGCAAAATCCCTCATTCTGTCTATGGTCAAAAACAGCCAGAATACTGTAAGTGCACACCAACATCGACAGC  
GAACGCTTCCCTTTTGTCTTTTGTCTTTTGTCTTTTGTCTTTTGTCTTTTGTCTTTTGTCTTTTGTCTTTTGTCTTTT  
GTTTCGAGAATACACAGCTAAAACCGTAGTCGACAAGCTTGAAGTTCTGGAGGTTGACCGTGGACTGTGACCAAGCAAG  
GTTTCGAGAATACACAGCTAAAACCGTAGTCGACAAGCTTGAAGTTCTGGAGGTTGACCGTGGACTGTGACCAAGCAAG  
TCGAGGTGGCAAGATTCCGAGTATGCAGCTGCAGAGACCATGAAAAGAACGATGAAAAGTTTCTCGAATGTTCTTGT  
AGTGGGTGTCCACCAGTTTCTTCCGCAAAAGATGAGTTTGTGAGAGAGGTCCTTTCGACAACTCAAGAAGAGAGT  
AAACATACGAGTTCGATGCTTGTGAGAAAAAATTTTGAAGTCAAGCGTATCCATAAGATGCCATCAAAGGTTTGTGGGGT  
TTTATCTCAATGAAAGCGTCTTCGTGAGAAAGCCGTAATCTCCCTCCATTTCTGGAAAAGGTTCTTCCAAAGTAGTC  
TCTGTACCTTTTTCGCTGCTGCCTCCATTCCTTGGTGGAAAACGTCGCAATTCGTTCCAGTCAAACCTCCACATCAAATA  
GCTTCAGAGCGTATTTTTCCTGTGTTTTCTTTCTACGAGATAAACTGCGCCATAAGTTCCCTTCCAAGTTTTTTT  
CTCAGCAGTACCCAGAAAAGTCGTTTGAAGAAATGTTTCTCTTGAGAGCGCGAGAGAAACGAAACGAAAAGTTTTTGC  
ATAATCGGCATTTGAAATGGGAGCGACTCTCTGACCCAAATTTCTTGTCTCCAGACCAACCACTGGGCATTGACATTTT  
CCCCTCTTCGAGGGGGTTCCTCGTCAAGTAGTCTTTTCTCTCTGACAAGCATATACATCCAGAGAACTTTTGT  
GGATGAGAAAAGTTTTCATGCTGTAAGGCAAGTATGCTTTGACGGGTAACCGATGTTTCTTCTTTGAAAACAA  
GAAAATCCAGCTCTTTCCTTTGGAGAGAAATTTCTGGACCCGCTCGAGCCAGTACGTCCTTTCGAGTTCTTTGAAATG  
ATGGTTTTTTCACAGGACGAAAACCAACAAATTTTATGGAATCTTTGTTCTCAAATAATATAAAAAAGTTTCTTCC  
ATGTTTTGACAAATTTCTGTACTTTTCTTGTACAAATTTTTTGTCTTGAATGTTTGTAAATGTCAGGATTCGGTCC  
CATCCCGCCACCAAGCTTACGTAAGGTTTCTTCCGCGTCTCGCCACTGCGCCAACTCCATCACTTACCGCAACCA  
CCTTTGCTCTGACCAGCCTCAGACGGAGGCGAGCTACTGGTCGCGCATCGGAAAGACCAGCCGTCATATCCACATG  
GTGAACGCGACCTTCCCGGAGCGCGCGTCCACTCGAATTTACGAGATTTCCCTCCGCTCGACATCACTCCGAGCTC  
CGCTCTCGTCTCAGCACGGAGTGCATGCTCCCGTTCAGTATTTCTGTTGGCGCCACTCTTCCCGTGGTTCGACGCTG  
CCGCGAATCCAGACTGTTTACATCGAACTCGGTTCTTTGCTGAGTGGAGCGTTTCCCTCTTGGCCCAACTTGATC  
GGAACCGTTGGGTTGAAATCTCTATCGATGCCACTACGTTGGCTCAGTAAAAATATATGTTCAAATAATATTTATCAG  
AGGCTAAAGAAACCATGGAGAGAGTTTGGCTCGATAGAAAAGCCTACGAAAAGGCCAAGGAAAAACATATAGAAAAGCGG  
AACAACCTCAGAGGACCAAGGGATGTTGTTCCAGGAATCTTCTCGAGCAAAGAGAGCTCGACTTCTCGTCTTCTG  
GGTTTTGTGACAAGCTTCAAAATCGGGATGTTGCTCTTTCTTAGCATCGGAAAAGAAAAGAGAGGGGACAGAAAACGGC  
CATGTGACAGCGATGGAAAATCCCTTTGCCATGCTTGTGAAAAGCCATTCTGTTCTCTTTTCTGTTCCAGAAAAGGAA  
CAAAGAGACAGGCAAAAACGCGAAAGCTCCAGCAACGAAAACAAGACAAGGCCATTTATTTCCCAAACAAGTTCTGAGAAA  
TCTGTTTCAAAGATAGGGTTTCTGCTCGCAATGTACCACAAAATTTCTCAGAATCAGAGATTAATAACTTTCTTGAACCC  
TTCAAACCTTTGAAAGGTGAAAATCTGTTGTTTATACCAGAGAAAATATATATCGGATCTGGAGGTTGATGAAAATCT  
TTGAAATGATGCTTGAACGTCATGTCCTCTTCTTCTTACTTGTCTTCTGAAAAGGCGCTTCAAACATATCGAAT  
TAAATTCGTTCTCAACGCTATAAAAAAATAAGATGCAGCACCATCCCTCGCACTACAACCTTTCGACGACCAACAGATG  
TCTCAAGGAGTTTTATCAGAAGCTCAAAAAGTCCCAATGGGTTCTGAAAGAGCTCGACTTACGAAAGGAGATGGCGGAC  
TGGACAAGACTGTCAAAGGAGAGAAAAGTTTTGCAAGCTCATCTCGGTTCTTTGCCAGTTTGTATGGCATCGTAGT  
TGAGAACTTGTCCAGAACTTCCAACAGGAGGTGCTTCTGTTGCAAGGAAATAGAGTGGTTCTATATCTCCAAGCGG  
CTAACGAACCTTACCAACAGAAACGTACATGAACCTCATCGATAACCTCTTCCCTCACCACAAAAAAGAGAGAAAGCT  
CTCGACGCCATAAGCAACTACGCTTCCATTCGTCCTCATCGCCGACTGGGTGGAAAAGGTGGATGGACAGAAAACGTCCT  
TTCTGAAAGGCTCATCGCTTTCGCTGCTTTGGAAGGAGTTATTTTACTGGAGCTTTTGCAGCCATCCACTACTTTACAA  
TTTCAAACAGACTGAAGGTTCTCAGAAAAGCGAACGAGTGGATTTGAAAAGACGAGGCTCTTCTCAAATAATTCGAGAG  
ACGGTATATCGTTACATCGTGGAGTGTCTCGGCTCTTCCGAGAGTTTCCCAAGAAAGAGTCAAGAAAATTTCTTGGCTC  
GGCGATCGACGCTGTCTCTCTTTCATCCATGACTGTCTTGGTTTAAAGACGTCACATCGACGAGAGAGGATGATCG  
GATACATGAAGAACGCGGAGATGGTCTTGCCTTCTCCATCGGAAACGAAAATTTCTCAACTCTGACTCTCTCTCGAC  
TACATGCTCTCATTTGGATGGACAACAAAACAACTTTTTCGAAGAGGTGGTCTCGGACTACGCAAGGGCTCGAAGG  
AGGAGGCAAAATTCGCAAAAGACGTAAGTTTTTAAAAATATTTTGTATAAAAATATTTTATTTGAGATGGACGCGGATATTT  
CCTCTTTTTCTTCTTTCGTTTCGAGACCCCTCCGCGAAGGAGCAAAATGTTCCCTTCTTTGATTGTTCTTTGCTTGC  
AAAGAACTTGGACCTTCTCCCAAAAATCAAAGTCAAGCGCTTGTGTTGTTGTTGGATGATGTCCACAGAGATTT  
CAAGGTCGAGCTCGCCGAGCTTTTGTAGAGCGGATGCTCAAGATGTAATTTTGAACCGGACAAACAAGAGGAGAGA  
CCATAAGTTTTGTCGCTCGAAGTTGTTGTTCCAAAGTCCAAAGCAAAAGTCTCTTTTCCAACTTTGTTCTTTTCCCGAG  
ACAAAACCTCGCAAGTCTTCTTCTGTTGTTGAAATCCATTTCAAAGCACGAAGAGCAATCTCTCCAGAAAATCTGG  
ATACACCAAGCAATTCCTGGCAAGGGTCTTGGGACCTTTTCCATCCCAACAAACGAGGCAAGGACCGAAATCC  
TGGGAAAATAATCCCTCTCCGCAACTCAAACATCCGCAAGTTCAAGCTCAAACGAAAAGCATGGACCATCAAAG  
TTTTGAAAACATGGTCGCAAAATTTGCTGAAAGGTCAAATCTTTGATGGGAGTAAGGACTTTGGATGAAAAGAAATTT  
CATACGCTCTTTGAAACAAGAAATTCGTGCGTGGTGTCCCTGTCAATATTTCTGTCCGATGAAAGGAAAGCGCTGCC  
TTGTGATATGCTTTTTTTATTTGTTGTTGTTGCTGCTCCGTAATCTCAAAGCACTTCCAAAGGAGATTTTCTCATCGT  
CCACGCTCACTTCTTTTGTGAGTCTCTCAAAGTCAAGAGAAAATATTTGATAGAAAATAATTTTACCAGGCG  
ACCAACTGCTGTACGTGCGTTCATCAAATTTGGCAGTTTCTCCAGACGGAAGAGTCTGATGAGGATTTAAGCAGGC  
AGTGGGACAACTCATCTTTGTTGTTGCTTGAAAAACATGGGCTCTCTGGCTTCTCCATCTGTAGCACCCGACCTC

CAATAACAAAGGAAAGGTCTGGAGTCCGACTGGTGTGATATAAAATTCATCAGAACCCTGTCGTAACCTGTGAGTCATTACA  
AAATACTTTTTCTTGAAGAGATATCGAAAGAAAAGAAAAAATAGAAGCAAAGAGAAAATGTCGTTCCGCGTCTCTAAAGC  
ACTTGTGTGCGAGAGAAAAAGCAAGCTCGCGAGGAACTTTGTTCTCTGACACCCATTGCAACAAAGTACAATCCCGCCC  
CTCAAGAGATCCGTCTTTCAAAGCAGAGGGAGAGGAATACGTTCTCCCTCTCGCGACTTGGAAAAAACTCGAATCCCA  
AAGCCAGAAAAACGCGGTCAAGACATCAGCGGAGAGTTTATCGGAGAGCTTCTCGAAGAGACAAAACCGCTCCCGGAAG  
GCACACGAAAAGGGACCAGCAGACGATATTCGAGAGAGCGAAAGAGCTCATCGACAGAGAAAAGCGTCTGTCTTTGAGTT  
TGAGCACAGGGATCGGAAAACTTGCCTCGAATTTGCCTTGCCTCTCACTACGGAGGAAAACTTGTGTCTTTGCAAG  
TCAAACAAAGTCAAGAGACAATGGGTGGAATCCGTCCAGAAATTCACAAACACAGCGTAGAGATTGTCAAGGGAGAGAC  
GCTCCCGAGTCAAAATTTTACATATGAGGACCTATGAGTAAACACAGCAATTTTAAAGGGGACCTCTCCTGTTTTGCAACTG  
TGATAGTCTGATGAGTCCACGAAATCTGCACGAGTGTCTTTAGCGAGGCGCTCTTTAAAGTTTATCCCTCCATCCTCATA  
GGTCTCTCTGCCACTCCCAGCAGAAATGGATGGATGGAGAGATGCTACCACCTTTTTTCGGAGAAAATCCCATCGTCCG  
CAAAGAGAAAAAGAGTTCAAGTTTACAAGATCCTGACCGGTTTCGTTCCAAAACAGAAAGTACGACAAAAGAGGAACTC  
TCATTTGGACAGAAATTTCTGAAGTCTCGCAGAGAACAAAGAAAGACAAAGTTGATAACAAAAGTTCTTCAAAGGCC  
TCAGAGGGAAAGACAATCGTTCTTGGGAAGAGGAGGAGGAGAACTTCCGCTCTCTCTCTCTCTCGGAGAAGCAAAAGT  
CTCAAACACTCTGTACATCGAAGGAGCAAAAACCTATGACGACGACGCTTCAAGTAATTTTAAACGACTGTGGAAGGGCG  
GCGTCCGAATGGACGACTCAAAGATAAAAACCTGTCGCAATAATCAGCGATGCGATGGACGTGAGACAGTACGAGGGAAGA  
CCAAAGAGGCCCAAAATTTTACATATGAGGACCTTGTGGATAAACACAGCACTCTAGAAAAACATTTGGAGAGAAAAGGAA  
TTGGTATTTGGAGAGAGGGGCGACCATCGAGGTCGTGAACCTTCGCTCTTTGTTATAATTTTGTTCAAAAAATATTTT  
AACGTACGTTTGGACCGACCACTTTCTCCACACAAAAAATTTGTGGAGAGAGTATGACCGTATACCTTTCCCTTTTT  
TGGCGTTCCAAGTCAAGAAAGAGTGGCATCTTTAGATAGTGGGACAGGTCGAAATCTCCCATCGGACTGCGTCCGACG  
TTCACTGCAATGGCATAAATCTCTGGTTCGCAAGTCTGGATTTTTTCAAGACACAGTACTTTGTCTCTCAAAGA  
CGGACTCTGACGCTCTTACACTCCGATGACCGCCCTTTTTTTCATCCACAATTTTAACTTTTCAATGTCCTAAATAATTT  
TCACTGATATCCGAAAGAGATGTCGTTCCGAGAGAAAAGCAGGACAGAAACGCCAGAAATTTGACCTGTGGTGGTAAACAG  
TCTTGGTTTTCTCCATAATTTGGAGAGTACTCAGAAAAAGGTTATGTTGTTCCATTTGCGAAGAACCTTTGAGCGTCCAC  
GTTCCGTTTTGTTTGAATCACCTGTGACCGTAGCCATAAATCCAGCTACACGAAAGTTCCGCCACTGGAGTTTGCCTGGCA  
CAGTACGGAGCCACAGCGTCCGCGAGCCACCGTCAATGGCAAAGAACAGTGGCTCCGAGTTGTCGTTTTGCCCAA  
GAGCTTGGTGGTGGCAGTGAATTAAGTCCGAAACCTCACTTCCCGTGTAGCTTGAATGACAGAGAATTTGCTCTCCA  
GGACTCGAATGATATTTGGAGAGTCACTTCAAGCGGACAGTACAACTCCAGTTTTTGTCTGTCGTTCCCGAAATTCGAT  
CTGGTCTCTCGCTTGGAGGTACAGAGTGTAGGTGCTTGAATGACAGGAGTCCGAAAGGGCGATGAAATCTTGTGGAGGG  
CAGGGCCATCTCCGTTCCCTGTTATCCCTCCATTCGGGTCTTTCAAATGTAGACATAGCTGCAATGTAACTGTACCG  
CATCCCACTGTCCGTTGGGGCAGGAGAACTTCACTGTCTCGCTCTTGGTCTGATCCAAAGTGCAGTTCTGGCGGAGG  
AGGGGAACCTGATTTTTTATGACAACACTTTCCCAAACAGAGCAGCCACAAAAGAGAGAAATGGACGAGCAAAAATA  
TCAGAGCACAAACGACCATCGTTAAACAAAAGATATTTTGGAAAAAATATCTTATCTCACAAAACCAACAACACAAGAGC  
GAACAGGACAATGACACAGAGACCGATTCCTCCAAATATCGTATTTTTTCTATCCACCCCTCCGCAACATTTGGAGGAG  
AAGGAGGACTCGGCGGGAGGGTGGAGGAGTGGCGTCCGAGGCACTCCGCAACTCACTCGTTTGGGTTTTCTGCGC  
GTTCTCCAGAAAACAAATGTCCATCCTTGTGATTTGTCTCCAGAAGTTAGCATGGCTTACGCGCTCAGCAGT  
GACATTTGTCGAAATAACACTGGCTAAATTTTGTAGTCTTTCCCTACTGTTTCCGACAGTGGTTTCCAGAGCTATCTTTC  
CGCCAGAACTATTTTGAATCGATGGAATGTTGTCCAGAAATGACAGCGTGTCTGTGATCTCTCTTCTGTGTCGAA  
CCTGGTTTTCCGGAAGAGGATGGCGTTTGGAAAGTACATCTGGATCGCAGGCTTGGAACTTGTCCAGAAAAGGATA  
CTGTGTTTTCTGGCATGTAACATCCACAATGTCCGCGTAAATCTGCCTTGTGTATATCTCTCTCAGACAGCGCTTGGC  
AAAATCCCGAAAGAAAAGAGGAAACAAAGACCTGGAAAAAGTTTGCACGTGTTTGAAGATAAATTTAGCGACTGTAT  
GGAGGAGGTATCGTTTCCGCTGTGATAAGTCTGTAACCTCCAAAAGCAGAGGGAAGAGTTTTCTGGAGGAAATCCGACG  
AAGTTCTTTCTTTGAGTTTGTGACATACCTGGCGCAGCTCGAGGTGCTGTAATCTCTCGATTGGAACCGTCTTGGCAA  
CTGTCCGGAACCTGCAATGCAAAACCATCGCATCATGACAAAAGCTTTGTGTCCGGGACCCACCCCGAGCGCATTTGTTG  
AGAGAGGTTTTCGTTGTTGAACAGTCCAGTACAACAGGATGTGACCCCTGCTGATTTTTCTGCATTGTTTATGACATGCT  
GGGCTTTCGAAGCATACTTGTACTTGTACGCGCAAGAAAGTCCGAAACACCGCAGTTGTCTGTTATTTGTCGAATCCC  
ACTGTTTCGATGATTCGATCCGCGCAATCAGGGCCGTCGTAATGATCCTGTGTTGCAAGGCTGGAGATACCTC  
CGCTCGAAAGTCAACCTGGCAAAAACGGGAGATTTTCAAGGTCATTTACTTTTTCTTTCCAAAAAGAAAAGTTTCTC  
TGGGACCGAAACAATATGCTTTTTGTAAGATGTCATAATCAGTTGCCCTGAACTCCCTGTCCGGGAGTCCGAGAACAA  
GGAGAAGTAGAGTATGGAGAAACCACTTGTGGAGTTTTTGGCAACAACGTTTGCAGTTTTCGACGAGAGTACGACAAGTG  
CTATTTCCGCAAGATTTGCAAACTGGAACCTGCTCTCAAATGACGCAAGCAAAAGTTTGCAAAATTTCTCTTTGTTCTA  
CAGGAAACGTTGACCCGAATGCTCTCTTTCTTGGCAGACAAGTTTGTGCGATCGCACACCGGCAATGACGAAACAG  
ACAACCGCTTCTTGTGTCTCAACAAGTATACGACTCAAGAAGCAGTGGGCGTATGCGCAAAAGGGTGGTGGGAGACGC  
AACTACTGGAACGCTGCTGTTTTCAACGCTATGCTGACGCTCTGCTCAGATTCCTCAGATCCGAATATTTGGATATGT  
GGGCAATAAGCCAAGTATCCGAAAAAGGACCCAAAGTTGACAGGAGTTTGTGAGAGTTTCTCCTTCAAAACCCCTAC  
ATGAACGAAAATCCAGAACGAAGGAGAGATTTTCCAAACTGTCGTTCTCAAACCTCGAAAGACACCATACCGAAAGGG  
TGACGGTTTTCAATGCTGTGATGGCGGACGTTTGTGGCAAAAGTTCCGGGCTTTCGCACTTTCTCTCTCAAATGTGCG  
GGGCGAATTTCTGTTGGTCTCGGCCCATCACAAGACAACAACAGCCAATGACAAAAGAGCTTCCGAAAGCTTTGCTTTGT  
TTTTTGGAGCAGCTGCAATATCCGTTTGCAGGTAAGTTTGGAGTGGAAATGCGACATCCTCTGTAACGACACATCGGTGAA  
TCCCATCCAAAAGCAGAGCCAAAGGGAACACATGGGTAAAAAAGAAATTTGCAACAGAACGTTTGCATTTTGGACGATG  
TGGTATCGACATTTCAAATTCGAGGTTGGAGGGATAAATTTGTCCCAAGTTTGTCTCTTCTTGGACAGGAGTGACG  
CAATGTTACTCTGACGGAGTACTGTGATGTTGTAACAGCAAGGTCACAGGAGTATAAATTTGGACCAATGGTGTTC  
AGGCTGTTCCAAACGAAGACGAGCTGGCATCTTTCGCGAAAGGAGGAGGAGCAGCAACAACGAGGCGGCGGAAGCGGGA  
GCAGTTTTTTGAAAGACATCTTTTTGTTTGGAGGGATTTGTTGATACTTTTTGCTCGTTCTCGGCGTTGCTTTGTTT  
TTGTTCAAGTAAATGGCGGAAGTGGATGAACAAATGGTCTCTCGTGTAGAGACAGAAATCAAAGTTGTGCGTGACA  
AGAAGCAGAGGAAAGGAAAAAAACCGCTTTTGTGAAGGAAGGAAAAATGCGCTCCCCGACGAGCGCTCTAGGAGACACAT  
CGCCCTCTGGAGACATTTGATGTTCAAAGAATAAAATATTTTTTACAAAATATTTACTGATGGCATCCCAAGTATCTTG  
AATCGCTGTGATCTGCTGTTCCGGCGTTCTGCGAACCGGCTGTTGTTTCAAACACGATCGTAAGAACCTTCCGTTG  
AGCCAAAGCGGAAAGAGTTCGTACTCTGGGAGTTTCTGTTGTTGAGAAAGTTCCATAGCTTCTCGAAACTCCCC  
CAAGTGTCTTGAATCGCTTGCATCTGCTGTTCCGGCGTTTCGGCCGAACGCGGCTGTTGGGCGTCAAAGCAGAAACAGA  
GCCTTCCGTAGAGCAAGAACGGAACCAACTTCTGAGTTCGTTGAGGAGGCTGTTCAATCCAATTTGTGGCCCTCATTG

AAGCAAGCATCGCCTGGTCTCGAATTTGTTGCAATTTGGGATGCCGCTGTTTTGCGCGTTGGGTTGACGCAATGCCTCTT  
GGAAATGGACATTGTCGTTCTCGGGGAGAAACCGGTCTGTTTTGACTCCGCGAGCCACACTTCTGTGCGATCTCGAA  
ACCGCAGAAGTTGATACCTCTCTGAATTTCTGAAATAGCCGCTGTCTGCCAGTACGGACCCACGAGTTTCTGACGAGCC  
AATATTTGACTCCTTCGGCAGAAGTTCCCCCAACCGCAATGTCAACAGCGTGACCTCCCATCGGCTGACCGAGAGGAGAA  
GTGCTGCTAAACACCTTCTTTGCCGCATCAGGAGCAGAAAAGAAATGTTCAAAGCCAGAGTATACCATGTAGCCGATGGT  
GAGCGGACCGTACAGAAAATGTCCTTATCATCTGAACTCGGCAGATTAGAGCTGGAAGAGTGCATGACAGGATAGA  
CGATGTCCGGCCTGAACTTTTACATCCCGGCTTTCCCTTGCAAGAATACTCCTCGATGTTTCCGTTGCACACCATCGAA  
ACGCTCCGACGTCTCTCATGTACTGGTAGGCTCTCCAATCATTCTCCCTGACAGACTTCGTTGGAAACAAGTTCTTTC  
AGGCCCTCAAGAAAAGAGCTGAGCAATGGCTTATCTGTTGCTGTAGTTGCGAAATCAAGAGGCGAAAATCCAGG  
GAGCGATGTTGTTGTGCTGTGATCTTTGTGCCGTTGGAGAGGGTATACAGACTCTTTGTTGAAGTTCTTTGTCTTGT  
GTGGAGATACGGAATCTGTGAGAGTGGCAGTGGCAGTGGAAACGCCAGCAACTTCGCACTGTGCCTGGTCAAGTGG  
CCGAGAAAATAAGACCCCGCCATTTCTCCTCGAATCAAATCCGTTAGGAGAGATGTGACAGTCTCTGACGGCTTTGGGT  
CGGCCGCGACTTCAACGACTCTTGAATGCGCAGCGGGCGCTGCTCAACAAAACGTATTTGAAAGGCTTCGGCTTTCC  
ATTGTTTTCAGACGGAAACAGATGAGTTCGCCGAAAGGGCGCATGGCTGTCTGAAAGAGACAAAATCTCTTCTCGAACCC  
CTCCTTTTCACTTGGAGACCAAAAACACGACCAAAAAGATGATGATGGCAATAACCAAGATTGGCAAGAAAAGCGCCC  
ACATTACAAAAGCAAAAATATTTTTCAGAAAAGAGAAAAGAAATGTTTGGAGGAAAGGAAAAGACAAGGTAATATCA  
TGGCCGCCATGTTTACGCAAGCAATGGCCGAGGCAATGTCACCCATACCGTACCGTCAAGCCGAGGACCTTACATCAAAA  
AAAACCTTACAGCGCAACGCGAGGTACACACGTCGATTTAGAGCTATGAAATTTGCTCTATACGTTTCTGTGGTCCAGA  
ACCAGTCTTTCTTGTGTCAAAGGAGGCACACCATCGAGTTTGTGAAATCATTCTCTCAAAAGTTCCGAAAAGAAAGAT  
TGCTTAGTGTCTGTTCTCGCCTCACCGAAAGAAAAGAAAGATTTGAGAGAATGGTTCGTTGACGACCTTTGGGACGAC  
TTTTCTTCTCAAAAAGAAATGCGACTCTACATTTGAGGATAAAAAGGATATGAAAGTGGAGTTTCGAAACGAAACGAGGAA  
AATTTATTTCTGGCATCGCGCGCAACATCAACGATCAAGGAGCCTCAATGGGGCTTCCCAAAGGAAAAGAAAACGTTA  
AAGAGTCAAACAGCATCTCGCCTCTTCGCGAGTTTGTGAAAGAGACTGGAATGGAAGGCAAAAATACAGATTTGTCGAC  
GACTCAAATCTTTTATTTGAAAGATTTTGGGGTCCAAACGCAAAAATTTACGGAAGTCAATTTTCTCGCATATGCGGA  
AGAGCAGTTGAAAATCCAAAAGAAAATACGACGGAGTCTTGACAATCTCTGAAGAGATTGCTGACCTTCGATGGACTT  
CTTTTCGAAAGCAAAAATATCTCTCGAAAAGAAAATCGCTCTCTGACAAAAGCTCTCCTTTCGATTCGCTCCTTC  
AATGGAGCAGCATAAAACATATCTCACGCAAAATATGTTTTCTGTAATGAGTTTTGTCTTGTGTTGCGGTGTTGGCTGTGG  
GGTTTATCATAATCTTTATTTTGTGCTCAACAGAAAAGCAACTCCACAGACCCCAAAATAGTGGCACTCAAGAGAGG  
TTGGCTGTCTTGTATAAAAATACCTCTCCTTGGACATTGAGAGGTTGATAGGGGTGCGTACACTGAGAAACAAAAGGC  
CATTTTCTTGTCTCAAAGACCCAGAAAACCAAGCAGTATTACGACATGAACACTCTGTCTATGTTGTGCTTCAAGAAC  
TTGCGCACATGTGCGAGCTAACATACGGGCACAACAGGAATTTATCAGAACTTTGCTCGTCTTTGAGACAGGCTGCC  
CAAAAGCAGTTTTCTGATCCGAGCATCCCATTTCCGCAAAAATATTGCGGCATCGACTCTGAACATCCCGGCCATTAGAA  
ATCGGCTCTCGAACGATAAAAAGAGATATTTGAAAGACCTCAAATATGAACTCTCTCGAAAATCTTTGTTTTGAAAAG  
TCAAGAACTCTTTGTTTTGAAAAGATAAAAAGTGAACAAATCAAGGTTCTGCGAGAGAAATATTTGGAGAGAGTTTGC  
AGTTTTCGTCCTACCCGCAACAGGTGCGCCTCTCGGTCTTTGCGTTGTTGGATGAAAGGAGTTCTCAGAGAGAAGGG  
ATTTTATGTTGACGGAAAACCTGAAAGGACAGCTTATCAAATGGGACAACCAAGGGCGAGTTCTCGAGAGAGCAGATACA  
AATCCGGGAGAAAAGACGGAGAGACAGTCTCTACAAGCCTTCCAAAATTTCTGATTTTGTATTGAAAATATAGACAT  
GGCGAACTTACGGAGAAAAGCTTGTGTATTTTTCCAGTTTCGGAACAGCAGAGCAAAAGCTCAAAAACCGAAAAC  
CTACCACAAAAGCTCTCAAGGAGGAAAAGTTTTCTGGTACGGCTCGACGGTCCATTTTAAAGGAGCAACTTTGGGTT  
GTGGCATTCTCGTGAACAATGCAAGATAATTTTTAATGATAAAAATATTGGAAAACAACCCAGAATCTACAGAAAAC  
CCAATTTCCCCCGTCCCTCACTTTTTCATAGCCCTCCAGTTTTGATGAAAACCTTGTGGCTTTTGAACCACTTTGGAA  
GAGACGATTTCCGGGAGGACAGTTTTGAGCTCCTGTTTTGTATGTCTGGAGTGAGAACTAGAGGGTAGCTTGTGTCTGG  
GAGAGCCACCCACAAATTTGCAATTTGGATATGTTGTATCCAAAACGCTGAAACGATAGATTTCTCCTGAGCTCTA  
CGTTTTCCCTCGGGAGGTCGAGCCATTTTTATATACCTTTGAATTTCCAAACCACTTCGTCATTGTTACACTTCTCTG  
TTTTTTCCCTTAGAATGTCCACAGCTTCTGTTGATATTGTCGCTCGCGGCTGATAGTGTGGAACGCATAATATCAAAG  
CTAAAGTGCCAACTGCCATCGCGATGAAGAGCATCAAAAACAACAACAGCACAAAGGTATGGCTTGAAGCACCAAAAT  
CCGATTCGCAGAGATGATGAGGAACTGAGAAGAAAGCACTTCTCCATTTGACAGTTCTTTCTGTTTTGAAAGCGA  
TAAGAAATTTATCCAAAAGTTGGGACACACTGTCTTGTTCGGAAGGAGTGTCCCGAAAATAGCCATTCTTTGCCATAG  
TCTGCGCATTCGTCTTTGGAGCAATTCGGGTTGGGGCAGCGGATGTCTGTCTCTGCTTGCCTTACCAAAAACAAGAGC  
GACAAGCAAAAAGATGTACCCGATGATGTTGAACATAGAGGACGACGCAACCCCTTTCATTGTATTACATTTCACTTTTT  
TTCTCAAAGTTTACAGCAACTCGCAACGCAAGAAAACGTTGCCAGGCTTGGAGCCACAGCAATCTGTCTGAAAACGT  
TCTACGGATTTCTTCTTTGGGTTGTGCAAGAGAACGAAATCCGCGTACATGGAGGACTCGAATAGTATGTGGCAGTGT  
TGTTCTGTTTGTGGCGTGCAGTTGGTCTGTTTGTCTTCTGAAAACCTCGAGGCTTTGGGAAGGAATGTCTAGTTTTTT  
GCAATGTCCTTGTGCAACCGAGTCCAGTTTAGCATGTGTTGCTCTTGGAGACGTCATCAGAGAGGAAAGGACA  
AACAAAAAACGTACTTTTGGCCATCAGCAAAAGACTCGAAATTTTCTGCTGCTGAGACAGAAATAGTTTGGCCAGAC  
TTGCTTCTGTTTCGACAAGATAAACTGCAAGGACTGAAAGTATCCGTTCAACGATCCATCTTTATGAGTTCGAGAGCGGT  
CGTTCAAATATTTCTTTCAAATATTTTTCTTCAAACATAGAGTTTATCTGTGCGACATAAATCTTTGTCTCA  
ACTCTTCGGCAACTTGGAGATGTCGCTCGAAATATGCTCCTCCAGTTTTCAAGCACTTCAAACAAACGAGGTCTCTCT  
TCGTTGCACATTTCTTTGTAGATGGCGTATCTGTTCTTCTGAGCTCTTCTCCACATCCACTTCTCTCCGCAATGTC  
CTCGTGCATGGAGTAGAGAGCCGCTTCTCTGGGTACATAAAGAAAATTTCTCTGTGCAAGGTGAGACACACCAAACT  
TACGAAAATACACGGCGATAAAAAGTCAAGACACACGTCCTGTTTTCGCAACCGATAAAGTCAAAATGCTCCAACGAC  
TTCATTTTCGACCACTCCAGACTTCTGTCTGAGTCACTTCCCTTTTTGAGCATTGTGGGAAGAAATTTCTCGTT  
CGTCTCATCTGGGAACACGAGGAAGCAACTGATTCTGTTCTGTCTTGCATTTTTCGCGGAGAGTCCCATGACAGCATCAG  
GAAAATAATCTGGTCTCAAGGCAAGTCTTTTGGGAAAAGACTTGGGAGACCAACGCTTCTTGTGTTGCGAGACGG  
AGAAGCTTCTCCAGCTATTTTCCCTTAAATGGTCCCTTACAAAACCTTTTTCCCGTGGCCTTCTCCACGGCGAA  
ATAAGTGTCTGTTTTGCCATAGCCGCAACAAAGCTTGGCTTTGACCAAAAGTCAAAGAGTCCGATTTCTGGCGACT  
GCCTCCTTCGAACTCCCTCATCCAGAAATCTAAAGACGTTGACGTCCTCGTAAAACGCTCTGAGTTTGGGATGACCT  
ATTTTTGCTTTCGCAACCAAAACGCGCCATCAAAAACAAAGTCTTGGAACTCTGCGCCTCCCTCTCTTCTGTTTTGT  
GTGCTTGTGATGACATAAGACTCCATTTCCATTTGAGGTTGTTCTGCTGTTTTGCGCATATACCTCTACCGTGTCTG  
GAACGTTATCTGCAAGTTTCGCTTCTGCTCCGATGACGATGACACACCAACACCCAGCAAAGGAAAGACTCT  
CTGAGACTCGAAAGTTCTTTCGACCACTCAAGAGCCACTTGTGCACAGAAAAGAAATTTTTCTCTCTCTTTGTTTT







CGCTGTGGGACAAAATCAGGGTCAAGGGATGATCCCACTCCTTCGGTAGTTCAATATGATTACAAAGACCTTCCCGAG  
ATTTGAACACCAACGTCGCGATGTACGACAAGGACATTTCTGATCCCGAAGTGTTCATGTGGCGTCCTCCGTTTCGTGTG  
GACATGAAGAACAGGCAACAAGCTGGAGCTGACCCTTTCAGGGGAGACCTTCCCATCCAAAAAATAACTGCTACGGAAG  
CGGGGGCTGTTTTCAAAGTCGCTACGGTCCCGGAGACAACAATCTTAAACGGTATCTTCAATGAGCTCTACCAAGAGAAAT  
ACAGGGCTCTACTGGCCAGAAATCTTACAATATGCGATCGCAAACGAAGAAACGGTTTTGTGATAGTTATCCCGCAGGAG  
GACCAAAATGTTTCGTTGCTTCCGATGTCAACTAAAGTTGTTTTGTCCACAAAAATATATTCTCAAATATATTTTTTATT  
TTCTCTGTCTTCCAAAATTTCTCCCTTGAACCAAGCACAAAAGTCTCGTCTGTATCCCTGCCCTCCTGCAAGTCTCCA  
GTTTTTTCAAAGTTTTCTCTTCTTCGTAGGTTTTACCCCTTCAACGTCATGTGACTTGGACTTCGATGATAAGATTT  
CGAGAAGCAACAAGATGTCGGAAGTAAAGCTGTTTCCAAAGTTTTCTTCTTGTGGAAATACGGAAGCTCATGTCTTTTTTATA  
GCAGCCGAAAATGTTCTTCTTGAACCCCTCCGAGAGCAGAAATGTCGATGGCAAAGTTCTCATATCTTGAATCTTTA  
TTGTCTTCCGGAGGGGAAGGAATAGTCCCTGAAACTGTATGACGACTTCATCGCCTTCTCTGACTTTTGGGTGTGGA  
GAGGAATATTCGACACCCAGTTTTTAAAGCAGTTTTCTCTGGATTTTTGTGCGAACTTCCACTTGAAGGGCGGTGCTC  
AACCCCATATTTTTCTTCAATGTTGAGTGCATTTCTCCTGTGTTTGGTTACCGAGAGGTTCCACTTCTGCGCTACT  
TTTTCAAAGAGAGCATTTTTCTTCTTTCATGTTCTCTGGGAGACTGAGGCAGTGTTCACCCCATATTTTTTCCATGCAT  
GTTGCTTTCGTTCTTCCACAATTTCCAGGATTTGGGAGAGTGTCCACCCCATATTTTTCCATCATCGTCTTTTTCTT  
CTTTTCTTCTACTGCTTCCGACTTTAGTGGGTTGGTCAACCCGAGTTTTTCAAAGCGTTTTCTTCCATCTTTTTCTTGA  
CTTCTTTCGTTTCTCATCGAACTTCCACACCAAACTTCCAAAGTTTTCTTCTTGTCCCTTCCGGTTTCAACTTCCGA  
CATCTTCCCAAGTTATCTTCTGCGCTGTTTTGAGAGCGACAAAAGTCCCACTGTTCCACAGTGGCAAGTGTACTCGAC  
TTTTGTGCAATATTCACATACTCCCCGTCATGATGCATCTTTTACTCGAAGATTTTTCTGGCCTGTTCCTCTCTAA  
TACCTAGACTCGAATTTCTTCCCTTCGTCTTTGTTTTCTTCTTGGTCAAACGTTGTTTTCTATTCTTCTGCTTCCGCT  
GCGCATTTCTTTCGAACTCCCAAGCGCGCTCCTCCCTTATTCCCTTTCGCGATGCGGAGCTTACAAAGTTCCCTTCCGCT  
TCCGCAATGACAGGTGAATCTGTCTCGACTCCATCATTCACATACTCTCCGTCATGACGCACCTTTTTGATGTGAAAA  
ATTCATATGCGCTTCGAGGGAATCTTTGCTTCTGTTTTCTCTTCTTTTCCATAGTCTCCAAAGAGGAGAGTGGGCTC  
TTTTCTCCATATTTTTTCTTCCGGAGTTTTTCAGTCTCTTTCTGTTTCTTCTCGAGTTGAGAGACATCCTCGACACCTG  
AACAGACAAGCATCTCTTTCTTGGCTTTTAGAGAACAATCCTTGCATCCCGACCATGTCTCGAGATTACAGAGTTCA  
TCAAAGCAAAAAGTCCCTCCTTCCCGCAGTGGCATGTATATTCGACTTTTGTCTTTCGATTCACGTAATCTCCCGTCAT  
GTGCATCCCTTTTCGCAAAAACGTCGTGAGCCTCTTCTGTTCTTTTCGCAAGAGACATCTTCTCAGAATATTTTTATC  
AAAGAAAATATTTCCATCTCCACACAGGCAAGCAAACTTCCGTTCTTCTGGGAAAATCCCTTTTTTCGATCCCA  
TGAACGTTCTCCAACATAGAATACTTCTCAAAAAATCGTCTTTCTTAAAGTCCAAGCATCACAGAGAGCTTCTGGAT  
GTCTCTAGATTTTCTCTTGTTCATCATTAAGCTTTTCCAGCGAAAATCCAAGCTGCGCACATCGTGTCTTTTCGTGATA  
GCGAGGGCGAAGCGGTGGTGTGAAACGAAACCGCAGACGAATTCAGGAAGGACGCTTTCTCTCTTCAAGGATTTCT  
TTCTCGCTTCTTTTCCACATCGCCAAAAGAGAACGCGCTCCATCCGCACTCGGGAATAATTTTTCTGGCTGATGGACCA  
AACTCTCAATGTTTTTGCAGAACAGAAAACTCCCTTTTGTCTTTTTTAAAGTCTCTCAATATGGACCCGAAGAGG  
AAGAAGGAATGTTTTGTTTCGCGCACTCGACGCAATTTCTTTTGTCTCTTGAAGAAAATTTGGGAGACAAGCAAAGG  
CGTTTTCTCTTGAATGAGGCTTTCAGAGCTTTTCTTCCGATCTTTTCTTATTTGTGGAGAAAGATGCCATAGAATGTC  
TTGCAACAAAATCGGTGATTTAACTTCTCCACAAAACAGAAATGTGCTCTTTGCGTCTTTGGGGAAGCTCAAGAACTC  
CATCGAAAAAACGAAAAACATCTCCAGAAATTTCTTTTATACAAACAATGGAACAACAATCCAAGAGCAATCTTTT  
CTATCGACTCGAAGCGCAACGCTTTCAGAGTATGGCGTTCCCACTCTCGATGCCGACATGCAGAGAGCTCATCGACTCT  
GTTCTTTTCACTCCATTCAGAGGACAAACAGGTAGATTCTGTTCTTCTTCTTCTTCTGCAAGGAAGCTTTGGAGATGG  
TTCTTTGACTTTGACTCTGCGAGATACTATCTGAAGAGAGCTGTTCCGGAGCTCTGTTGGTGAATATATTTTTTGCACA  
AATATATTTTTTCTGTTCTCGCAAGAAAGAAAGCGAAGCTTTCATGTCCTATCCTAGCAAAACAGTAAAGGAGCGAAATG  
TCGTCTTTTACAGAGACTCTGTCCCACTTTTATCAATAAAAAATATGGAAACTCCATAGACCCCAACAGTCAACTCAAC  
ATCTTTCTCAAACCTCGTAAAAATCTGGTTTTCTGGTGGATGCCAACCATGTACGTATTTCTCAAATTTGAGCTTCG  
CCCCAAAACCTCAAACACTTTCAACCACTCGATGCTCAGGTTCTTCTCTTAAATTTGGAATGAAATCTTTCTCTCT  
TGTGTTGAAGAGACATTTTTTGACAAAATAAAAAATATAGAATGTATGTGGCAGCGGAAACCAAAAGATTGCTCCATAGA  
CCTCGACTGTAGTGACGACCTTTCTATCGCTACAAGATGAGACAGTTGAAGATAACAGATTCTGGAAAGTCCGAGGACCT  
TTTTTGAACAACATAAAAGAGCTTCCAAAGGACCTTAAAGTCTGTTTCCGCAAACTTTTGCAAAAGTTTCTGGCTTTCGCT  
GGTACAAGTTGCGGCTTTGACAAAAGGTAGAAATTTATGGTACATTACAGGCTCTCACAGCACAGAAACCAATTCACGGAAA  
AGTTGGAAGTTTTATCCAGAGTTTTGTTCTTTGTAATACTTGTGGGCAACCTGAGCTTTTCTATGAAACAAAAAAGGAA  
AAGTGTATGATGCGTTGTAGGGGATGCGGAGATTTTCTCTCAAGAAGAGCATGAAAAATTTGCAAGTTTATGGTCAAA  
GAGCTCCAATCGAACACTTGAAAAAATAATTCATCCATATTTTGTCTCAAAGAATAAGGATGAATACCTTTGGAAA  
TTTTCATGCTCGTGTTTTCTTCCCTCAGCATCAGAGAAAAACCGCACTTTCTCTCACTTGCCAAAACGCTGAATTCAGCG  
CTCCCAATCCATGCTCGTGGGAAAACGTTGCTGTTCCGGACAGGTTGCGTCTCTTGAAGGAAAACCATAGAGAGACT  
CAAAAAGTACAAAAGCGGAAAGAGAAAACACGACAGACTCTTTCATCCCTTTTTTTCGCAATCTCTTTGGACTTGGGAG  
ATGACGAGGTGGAATGCTCTGCAATCTCGCAGAGCTAAAGAAAACAAAAGTCCCTTCCGCAATTCGCGAGGATTTGCACA  
TCAAAGTTTGGAGAGATTCCAGAGTTTTCTTTGTGAGAAGATATATTTTTTGGTGTCAAATAATTTAGTTGTTATACC  
TCGGGAAGAACATCGAGGAGAGAGACGCAAGGGCAAGCGTAGCTCTTACCGGTTGAGGGGAAAGAGAAAGGCGGTTG  
GACTGGCAAGCCATCTGGTCGTGAGTGTCCGAGTTCAATCCCGTTTTGGAACCAACCAATTCGTGGGTTGTTCCCGCACTG  
GGTAGGGAGGGTTGCTGACGACCGACGCCCATCGTATCATACTGTACTCTGCGACATGTCAACGGCGATCACAGGCC  
TGTGACGCGGCTTCTCGCGAGCGATGAAAGCCTGCAAGTTGTAATTGGGGTCCACAGCGTTACAAGAACCCAGCTCCGATC  
TTCTTCAAACGTAGGGGTCGCCATCTTCCATACTGGTCTCGGTTGAACGCGAGAGGGTTAATGTTACAGAGTGGACC  
ACTGGCAAGGTTGAATTTTCCGACCAAGCTCTCTGCGCACTGGGGTCAATCTGCGTTGTATAAAGCGCCTTCTGAC  
TGAGCACTGACGACATCTTACTATCCCCAAAATACAAAGAAAAACTTGCAAAAAATATTTCAAAGGATATTTTTTATTTCG  
AGACGAGCCGACATTTTGAACCTGCTCTGAGACGCAATTTCCGACCACTTTGTCGTTACATTTCTGGTCTCCCTCAA  
AGTGCCATCTGTTTCACTAGCTGGGTTGACCTTTCTTCTTCTTCCAAAGGTCACGATAAACCTGCTGTTTCTTTTTTCT  
CGTCTTTGAGTTCTGGAACGACGAGGAGTCTCTCTCTGTCGAAAAAGTAAAGGAGCGTTGTTGCTGATCTGCTGTGCTT  
CTCATGTTATTTGTTGTTCTTGGCCTCGTAATTTTTTACCACACTCCCAGGGCTTTTTCTGTGAGGAAGACCACAGT  
GTTTTGCAAGATTTGAAATCAGAGACGTTTTGTTACTGTTCCGTTTGTATCTTTGCAAGGGAAGATTTTTAATGGCGG  
AAGAAACGGCAACAACAGTTTTTTCTACAGAAGTTTTTGTGGGACTCGAAGCTTTCGTTGAGGTTATAAGGGATGAC  
GGGTCGTTTTTGGCAGCGTCCACATCAAACCTCCCATCGACAACAAAGTCACTCTTCTCAAAGGCGCCCAAGTTGAGC  
CGACAAAATATACCATATTCACAGAGCTGGAAGCCGCGCTCTCTTGTCTGAAAATTTGAAGGACGACTCGCCAC

GAGAGAGCGTGCCTGCGTTCGCTTCTGGCACCCCTTCTATTTTTGGAGAAGAGACGAGAGGCACAAAACAAAGCTCGAGA  
CCAGTGCCTTCCGTCGAGATGGACGCCTGTCGTTCTTTTTCTCTATCGAGCTCTGGGAGAGAACCGGAGCGCCAAG  
AGCCTTTGAAAGTTCTCTCGCTTTCGAACTCTCGTCAGAGAGGAGAACCTTTCCTTTCTGGGATATCCAAAGGACAAA  
TGGGAGAGATGACCAAAGACGTTCTCCTTCAAAAAAGAGCGTTCGCGTTTTTACCGAAAGAGTCGATGTATTGCGAAGTC  
GCAAGTTTCCAGAATGGAGTGCCTTTTCGGGTCCTTTGGTTCGACGGGGCTAGTTTCCAGACCTTTCTGTCTACGGACAC  
AGACCAAACCTCTGTTTGTGGAGTAAAGGCTGCTAAAAAGTTTGTGTGATAAATTTCTGGGTCCCTGAAGGTGAAATCTTTGT  
GGTTGATGGAAATTTTTGACTTTGGTTCCTCAGGCTTCTTTTTCTTCCGAGTCCGTCCGTTTGTCTTTTCGGGACGGTG  
AAGAGACCTCGTACTGCGAAGGTTAGGGCATGTCCTTCCAAGGAACGCGCAAGGAGAACGACCGTCTTTTTCTTTGGGT  
AAAATATGGAGCGATCCAGCTGTTTTGCTGTCTCGAATTTGAAAGACGCAACCTGTCTTCCCAAAGAGAAAACAA  
CGATGTTGATGTCATAAATTTTTCAAGAATTTCTCAAAAACAAAAGAGAGTCAAAGAATGTGGTCTTCTGATGAGCTCT  
CGGATCTTCTGTGCGTGGAAATCATAGAGTTCCTGCCTTCCAACGCTGAAGGTGCCATTTCCAGAAATTTCTGTCT  
TCTAACCTTGATGTACTGAGCTTTCGACTCTGTCTCCAACGCATAAATTTCTTGTCTTTGCGGTTTCGATACAAT  
AGAGCATACTGTCCGGAGCAACGTCGACAGAGTCTCAAAATGGTGTACAGGAGACTCTGAATCCATCACAACCTGGAAA  
AATCTCTCCAAAGAAGAAGGGATGAAGCCGCAAGTGTCTTTGCAACTCTTTTTATCAGCGCCGAAAACCTCTCTAC  
GCAGCCCTCGGATGTCTCTCGTTTTCTGACGGCTCCGTGTAACAACAGGGGACAAATTCGTATTTTTTCAGAGAAAG  
GTCTGACGTTAAATCTCAGGGCAGGGTATTTGTGGTCTTTGTGCTTTTTGACTGCAGCCAAAAACATGCCGCTCCCC  
TTTGGATCTAGGACTCTGTTTTTGTCTGAGCTTTGAGCTCTCTCGCTTCTTTTTCTGAAATGACAGAAAACAGC  
GGCAGTGCATTTTGAATATTTTTTCGAGAATAAATCTGGATATGTTCTCTCAAATTCAAATGTTTCTAAGCTCTT  
CGTCTTCTGCGCTTCTTATTTTTTCTTGAACGCTGGGTCTGGAATGAACTTGTATAGAGCGACGTGATGCGG  
GGAAGTCTTTCTCGTAAAAACCAAGGACAGAAAAGGAAAGTCTGAAAGCCTGGATTTACCTCTGATTTCCGCTT  
CGCAATGCGAATTTTGTCTCTGTGGAATTTGCTCGATCAGGGAGGAAACGCAATGGAATATCGGAAGGGTCCCCTTTT  
GCATTTGGGTCAAAGTAGACATAGAATCTGCTTTTGAAGTGTGTTGAAACTGTCTCATTGGAGAAGAAGAAATTCGAA  
GTGAGAGGATTTCTCAAGAGAACATCCACAAACTCTGCTCTTTGTACGCAAGGTGTAACGTAATATGAGGCTTTGAC  
AGCGGAAGTTTGTGTTTTCGAAAACGATGGGTTTCGCTGTATCGCTCAGAGACTCTTCTGAGAGTGCAGATAATG  
TCATCCCTTCGCGGATGGTACATCCAAAGAACATGTTGCTTTCTTGTCTGAAGAATCCGGCGTCCATATCACTCA  
TCATAGAATTTGTCCAACCTTGCAGCTGTGAGGGGTTGTTCTCTGAAAAGTCAGTGAAGCGAACGACAAAACCTTCAT  
CAAGATGACCTCTCTGTTCCGAAATCTTCGAGACCTCCCTTCCAGTAAGCCACGATTTGTGCTGGGGAAATTTCTCGCT  
AAGATTTATAGAGATTTCTCCGAAAGTTTGGATAGAAATAAAGGACACTCTTTGCAACTGCATCTCTGCAAAAAGT  
TGAAGTAGAGAATCTCCGCTGTGACTGTGGACAATCGCGCTCTCTTTGACGCGATAATCTCTCGCTGTTTTTGGGG  
GTTTTCTGTGAGCTGTGATGCGGAATTTTCATAGTCAATGCAAGTTTCTGTAGGCGCTCCCTTTCTGCTTCCAGTACT  
CCTTGACTCTTTGATGCGAGATTTGGGTCAAAGTATCCAACGTCCAAAAATTTTATTCCTTTCTGTTGAAGTTGCGTGT  
TTCGCGACAAGCCAAACAAGAGCTACTCCAGTTTTTTCTGTCTGAGAGACCAACGCTCTTTGTCTGTGTTTTGTAGAC  
TTTTTCGAGGTCGTGCTGCGTCCCTTGAGCACACTTCGAATGTCCAGGATTTTGTACGGGTCTTCCCGAATATTT  
GCCTGAGTTTCAAAACGTCATCGTGGGAAAGATGAAATATTTCTGGTATCGCTGCCCTCTTTGAGAGGGCGTACTTTGTC  
TTGACGATGTCGAGCGTGCATAGTCCGAAATCCAAAGGACGCCATTTTACAACCTAAGTCAACAAGAAAATATTTCTT  
GAGGTAATGCAAGGATGGAATGTTCTGCTGCTATTTTTTAACTGTTGAAATTTGGGTTTGGTGTCCCTGGT  
TGTGCTTTGAAAAAGGATGAACCTCAAAAACGGACCGCAGAAAGCGTAAGATTCCTTCTCCGATGAAGTGGTGCAGC  
TCGCTGATGGGTTCCGAGTTTGTGTTTTCAAACAAAACACGCTCTCCCTTCAACATCAAAGCGATGGGAGGAAAACAGTTT  
GACCTTCTCCCTTCCGAGAACGATGGTGTCTCCCTCCCTGATTTTGGAGCGTATTTGGTATTTTTGACAGATACCAAT  
ATTTGTTGTTGACAAAAAATCTTATCGAACGGAAAGGTTTACTTGGGAGCGACAACGACTCTCAACATCATCTACGAAG  
ACATGAACGCTTTTTGCTGTGATGAGACATTTCTGTCTGAGAATTCATAATCTTCTCTATTCCTCTGACTTTTGGAA  
AATGTCCAAGTGCCTCCAAACACCACCGTTTCGTACAAGGGAACAGAGGGGAACCGGTATAGCGTTTGGGACGGTCTCCCA  
GGACTATGCAAGAAATTTCCAGTCTGTTGTGGTTCAAACAAAATAATCGGACGCTTATTTGCGCATCGTCTCTAACAAAC  
TCCCGCTCTTTTCCACACAGGCCACTACTAAGTTTTTATTATCTATAAAAAACAAGGAAATTCGAGAGAACTACTT  
TTCTTCTCCCTCTTCCGTAACAACGACCATCTTTGTGTTGTATCCCAAGTCTCGCAGACGCCACAGCTTTTCGTACATTT  
CTGTTTTGTTCTGGCGAAACCAAGCATCCGTTGAGACAGAAATGCAGACTCTTTCAGCCTCGTCGAGAACGTCGGAAC  
AGAGGGACATTTCCATTTTTTGGAGAGCCCTTTGCGCACACACAACAACAAACATTTCCATTCATCAGAAAGGGTATCGC  
AATCTCTGAACGCGCAACAAGCAAAATCTTTGGAAGAAGCTCGCACACCTCAACATTTGCGAGATAAAAATTTGTTGA  
AAATAACTCGACGACAGTATTTTTTATACTCGAAAGGAACAAAAAAGTCCATGTTCTGTCTGAAAAAACGGTTGG  
AAAATACATCTTTGCAAGTTCTTTAGCCTCGTCTCAATGGCTGAAATTTTTTCATATTCATCTTCAAAGGAACGAG  
AGAGCATCTGAAAAACTCGTGATGATGCTTTCTGTGAACGTCGTCTCCGTAAGAAAGACTTTCCGCGAGTTTTGACATT  
TTCATTTCTTATTCAAAGAGAAAATTTGTTGTAACGTAATGAGACAGGTCAAAGACAGGTGAGGCGAGAACCGCAAG  
CTCCTCGAACGACCGGAGAAAAATAAGAGTTTTGGGGTCCATGTTTGTGGAGGACAAATTCACAGTTTTGTGCAACATAC  
ACTCCTCAGCAAGCGCAAGCTTTTTTGAATTTTATCACGGGTTCTCAGAGCTTATCCCTGCGTCTCTTTCAGAGCAAA  
TTTTCAAGAAAATCTGACAGAGCTTCCGCTCTTTCGGGATACTTGGACAGCAGGGAGAAAGCGTTTTTATGGACGTACC  
TTCTTCATGACAAGGTAACAAGGAACTCGGGAAAAAAGCCCTCCCTTTCAAAAAGTGAAGAGAGTTTACTTTGAGCGT  
CTCCTCGAAAAGGAAAGTTGTTGACTTGCAGAGGATAAAGTTTTTTTTATTTTTTCCAATAAAAAACAACAATAAGACGTT  
CGTTGTCTCGGCTTAAAGTCAAAGGAAATGGACGCTTTCAAAGTCCCCACATCGCAACAGAGATCGCCGTCATCGGGC  
CTGTGTACGTCATTTTTGAAAAACAAGGTAATGCCGAAAAGCGGAAAGAGAGCTTCTTGCAGAGGTTGCAAAAGCTC  
GAAGAGATGTCAAAACAGCAGATGGAAGCTCTGAAAATTTCTTACGCCAGAATAGAGAGAAATGAGAAAACAACAGGGAGT  
TTCTGGCTCGTTCAGGAAAAAAGAAGCGTTTCAACCTTTGAAAAAGCATACTCTGAGGAAGAACCAATGAATACA  
CGAAAGGTGCAAGTGTTTTTGCGCCACAGAGACGACACTCAAGAGAAAAGAAAGAACTCTTCTGGCTACCAACCTTTGGAA  
GAAGACTACGAACTCCTGAACACAGAAATAGGGTCTTCAAATATGGAAGATAAGACTAAAATGGACGAGACTTGGTTGA  
GAGAAAATCTGGAATTTGTTCTGTTCTGTATAACAGCTTATCAACGAACTCGAAATGATGGGACTTTCAAAGCTTTTGG  
AACAAACCCGACCTCGGAGACTTTGCAAAATTTGTATACCGTAACCTCCGCTGATTTTCTTTTGCATAAAGAAAATAAT  
TTTTCCCGGATGGTAATGACCGACACTGGCAAGTGCACCGACAAGGCTATCGCTTCTGCAAAAAGCAGGGGAAACTCTG  
CAATGTTGACTGCGAGATGTGTCTGCTGACCCAAAGAGAAAAGTAAAGGGAGCCGCTACGACAAAGAGAGGTTCT

TCTACTTTCCGCAAGGACTTTTGTGTTGAGGATGACGATGGTTCGCAAGAGCTCGTCTCTCCCAAGAAAAAGAAACCCCTCG  
CCGAAAAAGCGCAAAAGAAAAAGACCTCCCCAAGAAAGCCGTCGCGAAGAAAGAGGAAAGAACCCCTCTTCTGAAGAGGA  
GGAATCAGAGGAAGAAGCTCCCAAGAAGAAGACAGTGAAAAAGAAGCCTTCCAAAGAAGAAAAACCCCGCAAAAAAGA  
AGCCCTCTTGTCTTTGAGGAAGAAGGAGAAATGCCCCGATGAAAAACCCATTTGCAGTGTCTCTGATAAGGGAAGGGGTACT  
TGCATCAAGGGTTCACAGAAAACCTCTGGCTTCAAAGTCCATGATTAACATAGCGGTCTCACCATCGTCGGTCTTCCGA  
TGTGCTCAAGAAGTTGAGGAAGGATTATGAACACCTCGAGGGAGATATCAAGAAGTGAAGGAAGAGTCTGAAGAAGAGG  
AATCTGAAGAAGAGGAATCTGAAGAAGAGGAATCTGAAGAAGAGGCGCCAAAGAAAGTGGTAAAGAAAAAGACTCCAGCC  
AAAAAGGTTTCTCCCAAAAAGAAACCTTCAACCAGAAAGAGTGCCTGTCAAAGAGCCGCTCCCAAGAAGAAGTCAA  
GAACGAGGAGTCTCTGTGCTTTGAGGAGGATTAAGACAGCTCAGCACAGGAGAGGCTTGTTCGCGCCACAGGAAATGCG  
TACCAAAAACCGGCAGCTTTCTTGAGAAAAGAAAGAAAGATTCCCTTCCAGCGCAAGGAGGTGTACGGCACAGAGTTCAG  
TTCAAGAAATTTGTCAAAGAAATACAAGGACGTCGCAAGGCGAGGAAGTACGAGGTGGGAGAAGAAATTCATATCGAGGC  
TCCGAAGCTGGCTTACCAGCCATCAAAGAACTGCCAAAAGATTGAAGAGGTCTGCAAAAAGGCCGACTTTCGAGG  
AGGTGAAACAAGTCAATCGCCGATGGCATCGAAGCTGCTCTTTCGCGAAGGTCAAGAAAGAGAGAAGAAAGAAAGGGA  
AAGGAAAAAATGGAAGAGGAAGAACCCAAAGAGAGGTAGGAGGAGGAAGAAAAAGAAAAAGTCTGCTTCCCGAATC  
CGAGTCTCGACAGTTCGAAAAATCTGCCGAAGAAATCCAAACAGAGTTTGAAGAGATGTCTCGGCATCCAGGTGAGCGGT  
TGTA AAAAAGATATTTGAGATAAAATATCACAAGTTAAATCTTTCGTTGGCAGAGACTAATGGCTCTGCATCTCGAA  
ATCATGGGCATCTCTGGCATAAATTTCAACAGGTTCTCAGATGACAGTCCGCAAAACACTCAAACCTTTTCATGCA  
ACACGCTCAACAACAAAGGCAGAAATCAGTCCACGAGTTACAGAAACGTCACTCCACCACAAGAGATGAAGAGACCACAA  
GGTTTTCTCAGAAATTTGTTCCGTACAACTTCTTGGGCTTCGACTGAAAAGACGAATTAACAGAAAAAGAAAAACACT  
TAGAAATTTCTTTTTCGATTTCCAAAACATAATGTCTCAACTCTCCGAATGGTTTCGCGAGCAACGAAGTCCGCGAGTTCTA  
ACGAAACACGCAAAAAACATGAGGTGAGCTTCTGTTTGGACGTTGGGAAAGAGCAGGAAAAACAAGAGCTTTATTTT  
AGGCTGCACAAAAGCTGAATTTTCAATCTCTTTGATTTCTTTGGATAGAATCTC AAAAAGTCTCAGAACTTTTCAA  
GACAAGAGCTTCACTTTGGAAGAAAAGGGGAGAGGGTCTTGGACAGAGAGGAAATGTCAAGGCGATCAAGGACATC  
GGAAACAGTCAAGTTCTTTCTTCTCAAAGGACAGAAAACAGGCTTGGGACGAAAAGGAAATGGGGCATCGACTTTCGAT  
GTCTGTTGAGGAGGAATTTTCGACTCTCTGGCTTCCAACCCACAGGTTTCCGCGAGAAGAAAAGGTGAGATTCATCT  
TTGTGGGAAACAAATCCGCTTCAAGGTTCTCACAGTGCACATGACAAAAGTTGTGAAAAGCAGCTTCAAGAGAGGCGT  
GTGTACGAGTGCAGATGAGAAGGACAGTTCCTGCTCAA AAAACCCCGACGCCATGGTCAACTCTGTGAAAAGAGTTCT  
CGAAATGATCAGTCCCAAGCCTTTGCCAAAACGAAACGAAATATCTCTATGGAAGAAAAGGAAACAGGCTCTTTCTT  
TTAACCAACTGGTTCGTTCAAGAGACACGGAGACACTTCTTCTCAA AAAACCCAGACAGATAAAAGTCAAGACCTT  
CTTGAGCCAGGATTTCTGCCATCACGAAACAACTCGACGGTGAAGGGCTGTGTTGTGGTTTGGCCCTCTCGGCACCTA  
CATCGTCAACCTCCATACGACATCAA AAAAATAGCTGGCTTTTCTTCCAGTACAGGACACAGTCTTGGACGTTGAAC  
TTTTATGGAGAAAGAAAAGGAAAGTGTCTGTGCTATGCTTTGATTGCTTTGGTTCTCTGGTCAA AACCCAGGCTCGAAC  
AACTTTGACACGCGCTTCCGTCTATGCTCTCGAGTGAAGAGAAATGTGGGACAACTGCCCATAATATCTCAA AAAAGTA  
TTTTGAGGTTGGTCTCCACTCGGCTCTTTTGAAGGGATGGCAGCAGCCAAA AAAACAAGAGGAAATATCTCGCAA  
AGGCCAAAACAGAAAAGCTTTGGAGGCGATCTTTTGAAGAGGCTGTGAAAAGGCTTAGAGTATGCAGAGAAAAGGGA  
TTCAGAACGGACGGACTTATCTTCCAACCCGAGAGACCAGGTCTA AAAAACAGTGACCCCTCAAGTGGAAAACAGAGAA  
TCTGATGACCGTAGACTTTTCGCTCAA AACCAAGGAAAGGACGAAATCTTTTGTATGATGGGAGTGAAGGAGGAGAAG  
CAAAGTTTGAAGGGCACCGCTGCAACAAAGAGAATCCCGGAACCGTAAAGCTCCCAAAGTCTGTTCTTGGAGAAAATCG  
GGTCAAGCTTTGAGGGGAAATTTCTGAGTTTGGCTTTGACAAGGAGAGAGCGTTTATCTCCCTCAGTCTGAGAAAGG  
GGACAAGGATATGCCAAATTTCTCCACCAGTCTGTCTGTCTGGAACGACATCTTTTCGCGAGTACTTTGGAGACTT  
TGAAAGGAGAGGACCTCGTTCTACCGGAAAGGTACAACAACATCGTCAAACAGTGTCTTTTGAATAACCGAAAAGGAA  
AATCCAAACTTGTGGACATTTGTTCCAGGAAGGGGAGGAGACATCAA AAAATGGCTCAAGAGAGGATCGGTTTCTGTGAA  
AGGTATGAGCCGAAACAGGAAACATCGTCAAGTTTGAAGAGAGCAAAAGGCTCGAGGTTCTCGTCTTTCAA ACTTT  
TCAATGGCAAGGCACAAAACCCAGCAAGTCAATCAAATCTTTGAGAGAAGAAAAGTGGACCGCTCCACTGCTTTCTT  
TGTCTTGGATATTTTGCAGAGACAGAGAGGGATTTGGAAGGCTTTGTGAGACGCTTTCTCTTTTGTCTGAGAAGGAAG  
TGTGCGGATGTTTTCTGTTATGGACGCGAGGAGATAAAGAGCGTCTCGAAAAGAAAGGGCAAGTTTGA AAACTCTGCTT  
TTTTCTATCGAGAAAAGGAGAAATGGTCCAAGAAAAGTTTGGAAAACAGCGTCTGCTCCACATCAAGGACGAGACGAGCATG  
GTGAAAACCAAATGAAATGGCTTGTGCACTTGGAAATGCTGAGCGAGCCATGAAA AAAAGGGCTTTGAGCTTGTGTT  
TTCGAGGTTGATGGATGAAGAAATCTCGTTCTTTCGACGAGGGGTTGCAATTTGTGTCTCTCCACAGGATCGCCGTTT  
TCAAGAAGTTGTAATTTCTTTGTCTCAA AAAAGAAA AAAA ACTTGTAAATGGAAGACCTCACTGCGTCAA ACCCTACAG  
AGCAAAGACAAGTGGATTGTTTCTGCCATCGTGGAGTTTGTCTCATCGTCTGCTTCCCTTTCTCTCAAGATTAT  
GAATGGCCTCACAGGGATCTTTGGAATCAGCATCGCCGACCCAGACACTGGAGCACCCAACTTTTGGGTCTTGTGTTGC  
ACGGAGTTGTGTTATGCTCATCGTGAGACTTTTGTGAACTAAAATATTTTATCAAACAAAATATTTTGTGAAAGAC  
AAGTTGTGCAAGAAGAAAGAGATGGAGATTGTCAAGTTGCTTTCGTTGGGACCCGCACTTCAA AAAACGAAACAACGTTCAAG  
AGGTGGA AAAAGCTCACAGCGAAAATCTCGAGATCGTCAA AAAAGAAAGGCCACATTTGTGGTGGTTTTAGGAGACATT  
CTCGACACACAGAAACGTACCATGAAAACGCGCTCAACAAGGCCATTTCTTTTGGAGCAAACTTAGCGTTCTTGTGCC  
CACATTTCTCTTATAGGTAACCCGACTACTGCAACAACTCCAAATCCAAAACGACGAGACATGCGTTCAACGCGTGCA  
AAAGGTGGAAGAACATGATGTGTTGGACAAGGCAATGCTCAA AAAAATCAAAGGACACACCTTTTGGTTTTGTCTTAC  
GTTCCACCAGGAAGATTTGAAGAAATGCTTAAACACCACAGGACAGGATGGAAAAGGGCTTTCATATTTGCTCACCA  
AGAGTTTGTGTTGATGCAAGATGGGCTTATCGTGTCAACAGAGGGGAGCGTTTGGAAAACGAAACCCCTCTCGTGATAT  
CTGGGCATTTACGACTCGCAGATGTTTGGGAAGAACGCTACTACACAGGGAGCGCGCTTCAAGCAGTTTGGAGAT  
TCGGAAAAGAGGAAATCGGCTGTTGAAATCTCTGTTCTTTCGAGGCTGGATGGAGATCAA AAAAATACGAACTCGG  
AGGAAAGAGAAAGAAAACCATCTATGTCGACGCAAAGGAAGCACTTGAAGAAAGTCCCAAATGAGGATTTCTGAAGATT  
CCGACGTTCCGCTTGTGTTCCGTTGGCTCGGCTCGGACTTTGCTGCGCTCAGAAAGTCAAAGAATTTGCGAGAGATTTCA  
AAGTCTGCAACAAGGTCGCTTCCAGGAGAAAGGACGAAATATCAAGAGCCAGAGACTGTGGCAAAAAGAGATGTA  
CGAAATCATGGCAGGTTGTGGAAGGAGAGGACGAAAGCGTTCAAGTCTTTGAAAACAAATGAGAGATTAGAATATTT  
TTCTCTCCGAAAATATTTGAACTGTTCCAGAACAAAAGGTAACATCTTTTTCACAGGCAAAAGATGAGACGAAACAT

TGGCAAGCCCTTAAAAATTACGACACTCCTTGGTTTGAAGGGGCTGTGCGTTCCAAACAATGCATCCCAAACTGAAAA  
AGATGGTCTGGACGTTCTAAGCCATGCCATAGAACTCAGATTTTCCGATGCTGTCTTGGCGATGTGCGCTTGGCGCTTCC  
AAGTCTTTCAGCACCATGTGACAGAGCATGCAGCGGCTTTGAAAAGGACGAGTACGTTTTTCTTCCAGAGCCGAGGAAG  
CTTCTCCAGGAACAGTCCCTCTCGTCAAAAAGATGGACAAGAAGACAAGGACAAGTTTGTGGCTGGGAGACGACTCGAA  
ACTTCCATCAGATTTTCCAGCAAAGGAAAAGGCGGAATGGGTCCGCTACAGCGCAGAGACACTCAGATTCCTTCTTGCGA  
CCCTTCGCTCTGAGGTTGATTTCTGGTTGGAGAAGGCTTCTGCTGGCTTGAGGAACAAGAGAATTTCTCGAGTTCAAC  
GCGCAGTTTGTCCAAACAAGGTACTTTGGTCTTGGAAAAAGGACTTTCTGTTCTATGCCGTTTCCAAAGGTTATGT  
TGCGAGCTCGAATGTGACGCTCTGGAATATCCACCAAAGACAACGCTCTCGTCTTGGCCATCAGAGAGTATGCCAAGA  
ACGTTGGAGAGCATCAAACTCTGAGTCAAGAAGTTGTATGACCTCAGCCTCGACGACCTCGTACAAAAGGTGGAATTTCC  
GGACTCGAGAAAAAGACAACAAGCTCCTCCCTCAGATGCAGAGAGTTTGGACTCTCTTCAAATGTGGACACTTTGGC  
CAAGATTATTGGACAAGAGCAGGTGAACGGAAGTTGGACGGAACCACTCCAGTTCTCACCGCTGTGGAACAAGGTCGT  
CGATACTTTGAAAAAATTTAAGAGAGGAGCGTATCTCAACACAGTGCAGAGGAGCCAGGAAAATTTCTCTCACT  
GCTTTCAGAGATGCAGACTTGTCTGGAATTTCTGTAATTTCTGTAACGGAGCGAATCTGACCTTCCAGATGCAGGAGAGC  
GTGGCTTTCTTGGAGCGTTCTGTTGTGCTGTAAGCAAAGGACCAAAGAATTCGAACAGGGCGATGGAGCTGTTGCGAA  
CGTGTGTCGACTCGAGACCGAACCGGACGTTCTGCGAGGGAAACATCCAATCATCACGGCGATGAAAGCAGACAACTC  
CAGACACTCGAACTCGTTTTGAGTTCCGGCATCAACCAGACGAGGGAGTTTTCTGGCAAAGGACAACGGGAGAAAGGC  
GTCTTTGGATAGACTTGTGAGTCAAGAAGTTGTATGACCTCAGCCTCGACGACCTCGTACAAAAGGTGGAATTTCTCC  
AAGCTTCTCTCAAGATCGCAGAGAAAGAGGTTCAAACCATCTCCGCTCGATGTCTGGTCTTTCTGACGAGGAGTCGAAA  
GAAATCCTTCCATCTCTCATCGATGCAAGAGAAAGAGGACGGGAGTGCAGAAAAGAGCTCGACTCTGTCAACCAAGATTTT  
GAGGCTGTTCTGCTTTCGAGTCTGAGTGGATTTCTCAGACTCTGACCTTTGAGACCGGAGGTTGGCCACATGCCTCT  
CTATCATGGGTGAAAAACGAAACAAAAGTGGACTATCAAAAAATCAGAGAGAGAAGGCTTGTATGAGAAGGAAAGATAC  
GCAGAGACAAAACCTTTCGATGAGACACTTCTCCCTGATGGAACAGACGCGGAAACTTTTCCGATGACCACTGTTTTG  
GCTTTGAAAAGATGGGAAAGCGACAATCTTCCAACTTGGGACATTTCCATGAAAAAAGATGGTTGGACAACACTCTG  
AATTTGAAAAGGATTCGAGACTCCGCACTCGCAGCAGAACTCCAGGTTGGAAGAGGAACTCGAGTTCTTCTTCGAGG  
CAGCTGATGGGAAACAAGAACTCTCATCTCGTTCAAGGAACAACAAGGAAGATGAGCAAGAACCGGAAGAACAGAAACA  
AGAAGAAAGAAAGCGAGGAAACCGAGTCGAGAGGAAAGACGATGTGCTGGACGCGGCGATGAAAGCGTTTCAAAAACCTAGGC  
TCTGAATAAAAAATATGTTTGTGATATTTTTTTCTTACAAATTTTCTAGTTGTAATGGCTCTCAGAACTCCCGAGGAAT  
TCCCAATTTCTTTCGACACTCAGCCCAATCACCCTCGGTTCCGAGACCGGAGCATTTGGCTCAACCGAATTTG  
TCTTCTTCTGCTCATCTTCTCGTAACTTTGCTCGTTCTCAGAAATTCGGAACCGAGCGGCGTAAAAACTGGAATGTG  
CTCGACCATGGGAACTCTTTAGAACCGCTCTCTGTGGAGCTTGGGATTTTTATTTGCAATTTGGTTGCTAATGGTACT  
AATGTCTCACCGCCAGTAGCGCGGTACACAACAAGGCGAGGATTTCCGACCCCGCACAAAACAATAAATTTTGAA  
AAAAATTTATATCGCGCTTCTCAAGAAACAAAATGTTGCGGATTTGGAGTTTCCCTCCCAAAGATTTTGTGATGGGAGT  
TTCGTAGTCTTGTATGCTCAAGAAGCAGAGATTTCCAGTCTATCTTATCGTCCCATACATCTTCTGCAAAAATACGAA  
CTACCGAATATCCATTTTTATTTGACATTTCTCTTTGAAATCTATCGGATTTTGAATGAGTTCTGGTGACTTCCAATTT  
AAAACCTGTTCTGATGCTGAGGACCGTCGAGTTCAATGATGTCTTCGAGACGCAAGTCGAAGGGGAGAAATTTGTT  
TGTCTTGGGTTCTTACACATGAACTTTAAGTTGATGGATTTGGGTTTGGAAATGCTCTTCCGAAAAAGGAGAGGAGCT  
TCGCTTCACTTGTGTTTTGACAGAGGACACCAATTTCCGGAAGAGGTGTTGGAGAGAGCAGAAAAGAAATTTGTGTTT  
TTCTCACATTTGAACAGAACTTTTAGCTGAGCTTATAAACTCTTCTCGGACTCTGCTGTTTCTTTCAAAAGTCCCA  
ATATTTCCGCTTGTCTGAAGAGCAAACTCTTCTCAAAACAGCTTCTACATTCATCGAAAGACAGAGTTGTTTTATTCG  
AACAAAAGGACAAAACCTGTCATTCGAGACATCGCTCAACCTCGTTTCAAACTATGTTTGCATTTCCCGCATTCGAAC  
CAATGCTTTTTTCTGAGCTTATAAATATCTCCTCGGGCTCTGCTTATTTTTTCAACGCTCCAAAACCTTGTCTTTTT  
ATGACTTGCAAACTCTTTTCAAGCATGTTTTGCAATCGGGGAAAGAACAGAGTTTTTTTGGTGGGTTAGAGCAAAAG  
GGCAAAAACCCATTTAAAACAGCTCATTCAACCTCGTTTCAAACTGTGTTTGCACCTTCCAGTCAAAACCAATCTTT  
TTTCCCGAGCTTATAAACACTTCTCTCGGACTCTGCTTATTTTTTTCTATACTCCAAAACCTTGCCTTGTCTGAAGAAGC  
AAAACCTTTTTTCAAGCAAAAACCTGCAATCTTCAAGAGCGCACAGTCCGTTGTTCAAGCAAAAAGGACAAAATGCCAC  
TCGACACATTTGCTCAGTTTTGCTTCAAACTATGTTTGCATATTCGCAATTCGAACAAAACCTTTTTATTTGCTGTTTCT  
GTATATCAACAGAGGCTTTCCATGCTTCTTCTTCAAATTTTTTCAAGTTTTTCTGGGTTTCCGAACTTGCATTTAAAACAAGG  
CTTGCACCTTCTCTCCGAGAGCCTCCCTTCTTCTGTTTTTACAGTTTCTTTTTTCCCTTCCGCAAGTTTCCAC  
CTTTTCACTTTCCATAAATATTTTTATGGAAGCGAATGACTTTTTCAGCTTATTTTATTTTTTGTATCGAACAAAAGAAA  
TGGGAGTTCCGGGTTCTTTTTATTTGATTCAAGGAAATATCTCAGCACACTCGGCTCGTCCAAAAGAAAGGAGCCAAACA  
ACAGCTGACAAATTTGTATATCGATGCAGTCTGTTTTTGTGACAGCAGCGCTCAGGACGCTATGGGTATAACGGGTCAT  
CTCTTCTCTGAGACCTACAAGTCTTTCAAGAGAAACAGAAAGGAGATGGAGGCTTTTCTGCTCAGAGGAAACCGGATTT  
TTGCCCTCACAAAAGTACGTCGAAGCCAAAGAGGTTCTACGTTCTGTTTCGATGGCGTTGCGCCTCTCGGAAGCAGGGA  
CAGCAAAGGCACAGGCGCTTCTCGGAGTCCGACAGAGGGGTTTCGATCCGAATTTCCATTTCTTGTGGGACTGAATTCCT  
CGATAGGCTGCAAACTATGTCGAAGGGGTTCTGAAAACCTTTGTTCAAAGGAGAGTTTCCAGCTCATCTTCTCAGACA  
CTTCCATCGCGGGAGAGGAGAGCACAAGGCCCTCTCTTTCGCAAGGCAATGGGCAGAAAGAGAGCCATGTTTTTAC  
AGTCCGGATGGAGACCTTGTCTTCTGGCGATGACGCTCGAATTTCCAAAGACTTGGCTGCTCGAAAGGACCACATCCA  
GCAATGGAACACATCTCTTGCACAGACATCTCTGAAATTTCTCAAGAGTTTGCAGAGAAATCCCTATAAAAAGATTTGTCT  
TTCTCTTGTGCTTTTGGGAACGACTTCTTCCGAGGCTCGGAATGTTTGAAGGAAAGTTCTCTGACACTGCCGAATTC  
CTCCTTGCAAGTACAAGGAAAAAGGACTTCAATTTTTCAGCAGAAAGACAGGCAAGTTCTGGCTAAAAACACCTTCAA  
AATTTCAAGTTTTTGGAACTTTTGAAGGAGCTGTTTCGATGAGAGGTTGCTATTTTCGAGCTGACGAAACAAAAGGAAG  
AGAGGTCGACAAGAGCTTTTGTCCGATACGATGCAAGGGAGGAGTGGACCTGAAAAGTACAAGGAAGTGTGTTGCC  
CTCAAAAACAAAAGGTCGAGAGAACAGACGAGAGATTTTTCGAGGCTGTTTTGTTGGGTTGACTCTTACTACACGAGG  
CTGTCCAGACAGCGGATGAGCTACAAGTATTTTACCTCCGTTCTTTCCGACGCGCAAGAGGATTTGGTCCAGC  
AACCGTTCCAAAACCTGTTGTTCCGAACCAGCTTTTGCAGCTCCTTTGTTTCTCCCTCCACACAGTTCTCACCTCTTG  
CCGAGGAAGTGAAGAAATACGCTTGTCTATGAGAAGAAAGGAAATGGCAGAGTTTATCCAAAAGGAAGTTGAGGTGGA  
TCTTGAAGGAAAATTCAGGACTACGAATCTGTTCCGCTCATTTCCGATGTGGACATTTTCAGAGTTTCAGAGGAAAGTTG  
AGAAGATCTGTTGAGAGGAAGAAAAATATATTTTTGTTTGAAGAAATATATGAAGTGCAGAAATTTGCTTTGCTCAA  
AAAGTAGTTTTTTCGAGAGCAAGGACGCGGAGAAAGACATAAAAACGTTAGTTTTGCGCAGTAGTTTTGCGCAGACGAAGC  
GGGAGAAAGACATAAAAACGTTAGTTTTGCGCAAAATGGACGACTAGGGGTTACCCCTAGTCTGCTCAAAAACATACTAGC  
ATATAAAAAATTTTTATATGCGCTATATAAAATCATTGACATTTTTTTTTGACCGAAAAATGATGCAAAAATACTGAA

TAAAGAACAGTCGAGCATAAGTAAAAATGTTACATGTGAACCTTGTGTTTTATGACGGAAGGACATCTCGAACTACAAAA  
AACACCTGTGACGAAAGAACGCGAAAGACTTTGCTCACAAGACTCTGCCGACCACAAAGAGAAAATATTTTTGTGAAACG  
TGCAGTTATTTACAGACAGAAAGTCTGTCATCGACCGTCATTTGAGCTCTGAAAAACATAAAAAAGAAAGTCTCCCTTGC  
TCTTGGACCCAAACGAAAAAAGCTTGCCTCTCCGAGGACAAACTCAAAAAGTTGCTCTCGAGAAATCTCGAGAGCAAAG  
AAGAAGATGAACTCCGTAAGATAAAAAGACGAAGATGGAAGGAAAAATCGCGTAAAAATATGTCGTGAAGGAGAGAAGTTCT  
CTTGTGAAGGATAGAATTTCTATTTTTGAATGGATAAAAAGGAGTTTTGGAATTTTTTGAGGTAAGCGAGAGAAAACAGA  
GGGAGGATTTTTGTGACATGGAGAACGGCCACATATATGGTCTCAAGAAAAGACTTTTTGTCTTTCTTTTGAACCTG  
CTGTGGGGGAATGCAAGAGTCCCAAAGAGCCGCATCGACGGAATACGAAAAACATCGCGAAAAGAGGAGGATCAATATC  
CCAGCAACTGTGGAAAGAAATGTTGGGACTGATAAACCAAGAAAAGATGAAAATGGTTGCTATGCGAGCCCAAAAAGATG  
TCAATACCTCATTATCCACGGCAAAGAACTCTCGAAATCACGGATATCATCAGGGACAAAAAACTCAAATTCGACAATC  
TTTCGAGGGATTTTGTGCTGTTGGGCGAGCGCGAGCATTTTAAAAATGCTTTCAGTATAATTTGGTTGTGGTGCCG  
AATGGAGACGTATTTCCCGGATTCGAAACAAAAAGAGTCAAAGAGAAAATATTCGAAGGAGAAAATTTTATTGGGGAGGA  
TTTCGAGGATTTCAATAAGTCCCAAGTCCGTTATCGACGACGAAAAGTACGTTGCTTTTTGGATAATTTTTCCATCAAATTT  
CACAAAAGGAACTGCATCCGGACATCAAAGCGGTCAAGGCTCTCAGAGGAACTTTATCTCTTTTTGGGAAGAAACACAA  
CAAAAAGGCTCCCTTTGGAAGCGTACGGGGCGGTACAGTCAAAAAAGAGCAGATTGAGAAAAACATCATCTATTCGCA  
TTTCGGCATCGTGAAGAGGATAAAAAATCGCGTCTTGATCGTGTCCAAATCAAAGATGTATAATGAGTGTTCCTCAA  
TTGGCAAGATTTCAATAAGTCCCAAGTCCGTTATCGAATTTTGGAACTGAGGACTATCTGCCAAAGGAGAAAATTCGAA  
CGAGAAAAGAAATTTCTCCCATCTTTGTGCTCATCGTGGAAACGACAGATATCTTTTTTCAGATGATGGGGTAAATTC  
CGTGCATGGATGCAAGAAGGAAACGGACAATGTTCTGGGTATTTCAACCACCTCAAAAAAGAAATGCACAAAGGAGTT  
GTTTATTGGAGCAAACAAGACAGAACTCTCAAAGAGCTCTGGAACCTTTTCAGGAGAAAATCTCCAAAAAGTTGTGCGA  
AGAGGTCACGGATGAAGAGTTTGGCTCTACGAATTTTGGAACTGAGAGGACTATCTGCCAAAGGAGAAAATTCGAA  
TTTTCTGTAATAAAAAATTAGCCGAAAAAATAAAATATACCTGAATATATTTTATGGACAACAAAGCACAAATTTTGAC  
TTTTCCACTCTTCCGATGTAACATTTTCGAGAGTTCAAAGATCGTTGAGAGAGAAGAAAAATATCACCTTTTCATTCT  
TTTGGATTTGAACCAAGAACTGAAATTTTTCCCTCTCCGTCATGAAAATCATGAACTGCAAGAAATGAAATTTCTTTCT  
TGAACAAAAAGAAATATAAGATGAGCCAATGTGCGACTACTCGAAGGATGGAGATAGTTTGCAGTTGTGGGAAAAGTTGTA  
GACAAAAGATGTTCTTGAACACCTTGGAGACACCAAGAAAATGGAGCTGTGTTTCGGAAGTGGAGGATGGAAAAGAG  
TTTTATTGTGGCCATGCAACCTCATGACAAAGAACCTTCTCACTTTCAAAGGACCTCACAAAAAGACTCACAAAGC  
CGCGTTTATTACGCTGCTTTTTTCTTTTCAGGAAAACCGCGAGATAGCGAAGAGAGAACTTTTTTCGAATCACGACT  
GGAAAACCTGCTCAAATTTTCATCCAAACGGAATATCTTCGACAGGTGGGTACCGTCTACGACGTGATCGGCCCGCGAAT  
ATCCTAAAGAACGAATGATTTATTTCTTTCTTCCAAAAGAAATCAAGCGAACCCGACTCTTTTCGAACCTTTGAACACAC  
ATACAGCATGCAAGAGAACAAAGACATCATCATCCATCTCCGAGGTGCGATCGGTTCTGGAAAAACAACCTATGCCAACA  
AGCTCAAAAAGTTTTGTTGAGGAAAACAATGGACGGGTGTTTTATCGCTGGAACGAAACGAACTCTGTGGACAGGGTAAATCT  
CCTCAACAAGCCTCTTCCATCGTGAACAAGAGATTCGCGATTGGCTCAAAGGCGTTGTTCCAGAACAACTCAATGTTCT  
TGTTGTGGACACTGTGTTGAAAAGAAAACACCAACCGGTCTTTGGCATCGACGTGTCTCTTTGGAAGTCTGTGGATGTTT  
TTCCCAACAAAACAGAAATCTCAAGGGCTATCTCTTGTCTCTTCGCAACGTTCTCGAAAGACCAAGTTTAAAGAAG  
GGATCGGTTTTATTGGCTCAACCAGAGAGACAATGGGATAGTGGTCCAGAATTTGCTATAAACTTCACAAAAGAAAGC  
GCAAGCGCTCTTTGGCAAAAGAGGATATCCGAATCTCTTTCCCGAAAAGGCGAATTTCCGAGGACGACGCGGCTGCTT  
TGAAACCATCTGAAAGCATCTGCCGATTTTATGAGATGGAATGAAAGAGACTCGGGGAAACAGATTTTTCGTGGGTGTTG  
TGAACAATAACAATTTTTGGAAGCAAAAATATTTTCCGAGGTTTTCCAAAGGTTTTGTTGATGGGAGTCTCGTAATC  
TCTGATGTTTGGAGAAGTAGAGATTTCCAATCTATCTTGTGCTCCATACATCTTTGCAAAAATTCGAGAACCGAAT  
AGCCATATTTATGGCTTGTCTTCTTGAATCTGTCAAGATTTTGAATGAACTCCGAGATTCGAATTAGAACTTGT  
TCGTAATGTTGCCCTCCATCAAGCTCTATAATGGTCTTTGAGACGCAAAAGTTCGAAAGGGAGAAAATTTGCCCTGTTCTG  
GTTCTTGCACCATGAAACTCTGAATTTGTAACGGGGTCTCGGAAATGCCATTTGGAGAAAAGGAGGAGCTTCGTTCCAG  
TCTTGTTTTTGCAAAAGGGACACCATTTGACCGTTCGAGATGTGGTGGAGAGCAGAAGAGAAATTTGTGTTTTCTTTACAC  
TCGAACCGAATTTTTTATGAGCTCAGAAAAACTTCTCTTGGATTCTGCTTATTTCTTTTCGACATTCAAAATTTCTAC  
TTTGTCTGAAGAAGCGAACTTTTTCAAAGCATATTCGCATTCAGAAGAAGAGCAGAGATTTTTTGGTGGGCTAGAGC  
AAAAGGGGCAAAAGCTCCCACTCGAAACTATCCGACTTATTTTCGAACTGTGTTTCCACTTTCCACTCGAACCTG  
AATTTTTTATGTGAGCTCAGAAAACTTCTCTCGGATTTGTTTATTTTTTTCAAAGTTCCAAAATTCGCCTTGTCTGA  
AGAAGCGAACTCTTTCAAAGCAAAATTTGCATTCATTGGAAGCGCAAAGTTTATGTTTCGAACAAAAGGGACAAAAAT  
GCCCCTTGGAGATGACCCGAAGTTGCCGAAAACCTGTGTTTACATAGCCACATTCGAACCAAACTTTTTATTTGAA  
GTTAAAAACACTTCTCGTGGACTCTGTTGTTCTTTTTCAATGCTCAAAAATTCGCTTATCGGAAGAAGCGAAGCTCTT  
TTCAAAGCATATCTCAAACTCATCAAAGAGCAGAGTTGTTGTTTCGAGCAAAGGGGCAAAAATCCCAATTCGAGACGT  
TGTTCAAATAGCTTCAAACATATGTTTGCATGTTCCGATTCGAACCAAACTTTTTATTTGCTGTTTCTCGCGAGAAAC  
AGAGGACTTCCGTGCTCTTCTTCAACCACTTTGACTTTTCAAGAAGCGAACTTTTTTAAAAACAAGGCTTACACTT  
CTCCCTTCCGAAAGTCTTCTCCCTTCGAGTTTACAGTTTCATCTTATTTCTTTTCGTTCAAAGTTTACCTTTTCA  
CTTTCCACAAAATATTTTTGACAAAAATTTTTATCTCTCTCATCAAGTACAGCAGCAAAAATAATCAATCCAAT  
CCAACCCCGGCCACAAGCAACAACAATTTCTTTTTTCACTCCACCTCGCAACAGCCTCCTGTTTTTCTTCTGGAGA  
CGAAATTTCTTCTCATCAGTTTTTTATGCGCTTTTTCTGGGAAGCTCGCCGTCATTTCATTGTTGCCATAAATGCACGA  
CATAAGGAATTTTTCTTGCATGGCGGATTCAACAGATCGCAGAACCTGGAAACGCTTTGAAGCCAGTTGCTCTTTA  
TTGGTGAACCGTTTGTCACTGAAAAAAGGGCGATGGTCCGCAACTACCACTTTCAAAGGCCCTTGGATATTTTTTC  
GAAAAAGAGTGTCACTCGCAACGACCTGTGTTTCACTGGGTCCGATTTTGGGTGTAATGTTCCGCGATAAAGTCTA  
TTAGTTTTCAGCAAAACTCTTCTTGGGCGGAGAAAATCATGAAAGCGTTGCAAAAGAACGACCTCTTCCATACAAAAGTT  
CGAGAAATGTTCAAAGGTTCCCTTCTAAAACATTTTGTCTTTTTTCGAGCCAAATATCTATCTCCGGAGAGGCAATGT  
ATCGATATCGGCAATGACTCCCAATTCGGTACAATATCAATACCGCGCAAAAATCCACTCGTTGATATTTTTTGACA  
TCGCATCGTACAAAGCAAGATGCTGAGGAAACATTTTTTCCCGCTCTCTGAGGTCATGTCAGTCCAGATAAAATTTAT  
TCGAAAGTCGGGAACATGTCCTCCATGTTTTGACGAGGCTCTTGCAGACTCTGGGAGCTCTTTGCTCTTCCATGCTG  
ATGCAAGATTTTCCGCGTGGAAAACCTTGACCTTTTCACTCTTACTTCTTTTACGCCCCAACATATCTGCATTTCAA  
ATATTTTCAACAAAATTTTTATTTCTATGACCGGACGAGCAAGAGCTCTTTATCTGTTTGAAGTCTCGGAAATGGGCG  
AGATGACTCTTCCCAAGTTCCGCAAAAGTTTTATCTGCTGACGAGGACACTGGATTTCTCTTTGGAAAGTCTGTCT  
CACTACAGGAAGGCCAAACATCTTCTTCTTACGTTCAAGGCTTGTGATGTTTTTCTGTTGTAAGAAACCAAGTT  
GAACGAGGATCGACTTGTCCGTATTCAGCGCTTTTTGCAAAATGTCATCGTCTCTTCCAAAAGATTCGGCTTTGAACT

GGTTCTTTTCTCTTGACAAATGCGTCCACTACTCTGTTGGTCTTTTTGCGGAATGTGGTCATTATGTTTTGCTTCCGAAA  
GAGATTCCTTAAAAGGTCACAAAGTCCCTGTCTCCGTCTGAAACCTCTCCTCCAATCTCTTTATCTTCCGAAAAGTT  
TTTCGTATGGAATGGTCTGTTTCTCCAGACATTCAAAGTTTATCGATGGGCTTCACTTTTTGTCTAGGTACAAC  
CCTGTGTGATGCGAAGACCGAGTCTCTTTTTATGTCCAGGTACCAGGTGAAATCCTCAATCTGCTCTGCTCTGAAGAA  
TTTGTCTCCCTTCTCGCTCCAGGAACCTTCAAAAACAAAACCTCGAGGCGAGTGTGGGATGACCTCTTCCCTCTTG  
TCTGCATCTTCTTTGCGAGAGCAACGTTGGACAAAACCTTTCCCTCGTCTTGTACTCGTCAAGAGCTCTGATAGACTTT  
GTGATAACGTATTTTTGGTCTGGAAGAGCTCTTGCCATCATCAGGTAGATTCTATCCAAAACATTGTGGAGGATCTCTTG  
CTGTGGTCTCTTTTCGATGAGAGAGCTGACTGACTCTCCGAAAAGTCCCGCGCCAAACAGACAATATCTCTCCTCGTGA  
GGATGATGCCCTTTGTCTAGAGGGCAACCGCAAACTCTCTTTTCTGTTACCGATCTTGTGTAGTATCTTTTCTTCGAGAG  
AAGAAAAGTCTTACAGAGTTTCTCAAACCTGGAGGTTTCTCGGAGCCACAAGATGCTTTGAAAACCTTTTCCCGACCAT  
GTTTCCAAACTCGATGAGTCTCTCGAGTCTTCTCGGGTAGTGAATCATACAGAGTCTGTGTGCGCATATACATAGGG  
TTCCATCGGGCCATCTTCCAATATCATCTGGAGCACTTTTTGAAATGTCTCGCTTCCGGTGTGCTCACAGCCGCCGCG  
GCTTCTACCAAAGGACAAGTCCCTGTGTGCTGCTCAAGAGCTCCGTATCCAGAGTTGCTGCGATCTTGAGAGCGAGCTG  
TGTGAGTTGAAACCTTTGACCTTTGCAAGAAGTTCTTTCTTTTTCTGTTGGTGGTTCAGCGTCTGCGAGTTTTGCA  
TATCTCCCATCATCTTTTGACAACTTTCTCTGTGTCAACACGCCACGAAGCATGCGAGGCAAAACTCCTCTTCGAGC  
CTTCCGTGCTCAAAATCTTGACTTTTTGAACTCTGGACAAAAGTGTCCAAAACAACCTTCTCATCTCTTTTTCTT  
CTTTCTCGCTTTGTGTCTAGAGGGCAACCGCAAACTCGTGTGGTCCATTCGATGACATTGCAATCAGAGTCTGGCA  
CCGATTTGTGTCAGTCAAAAACCTTGTGTAGTCAATGTTGTTGAGATAATCTCTGAAGATAAAGGGACTCGAAATCC  
CACACGAGGATATCTCCAAAGTCCGATCTTTGCGTCAAACTGTGGCTCCTTGAACCTTGACGTTGGATTCTTCTT  
TTCTGATCCACGAAACTCGACATGACATCGTCTTCTGAAGTCTCGATAGAGGCGAGAAAAGACCTTGACCTGTGGC  
CTCTGTTTTGAAGGTACTCTCTCGGAAACAGAGAGACGCTCGCAAGCATGTCCATGTTTGAACAACGCTCTTTTTCTC  
AGAAGTCAAGAGGCGAAGAGTCTTGAACGCAAGTCTGCGAGTTTTGTCAACCCCTCCTCACAGAAGGTGCGAG  
CGCTTTGAAGCTTTTTGCAAGTTTTTATCTTTTTCGAAAGTCAATGAGGTACTTTGTGCTGTGTCTTCTGTTGATGGAG  
TGTAGAGCTCCTCTTGTCTCGAAAGCCATCTTTCCGCGTTTTCCAGTGCAGAAAGAAATCTCCATGACATTTGAAA  
AGCTCCTTTGCGTGCATCTTTCTTCTCTCCAAGGAACTTTTCCAGCCAAAAGTTCGAGGGTGTTTTTGTCCAGTTT  
CTCGTCTCTCAAAGTGCATGTATGTGATCTGGGAGATTCAGAAATTTGAGAAAATTTGAACTCTGCGTTCAT  
AGGCAGAACTTCCATGACATCTGTCTTTCAGAGGCGAGAACCGGAAAATTTCTCGTGCAGGAGTTGCAGAGTCTTGG  
AAGAGACCGCACTTTTGTGTCGAAACCATGAGATAGTTCCAATCAAACCTTTAGGCTGTGTTGTAACCCACGATGATGCGG  
GTCAATCTCTGCGATCTTTCAATCATCGCAGCGAGAAAGCGCTTCTGTTGGGTAATTTTGACCACCCAGGAA  
TTTTGAGAGAAATTTCCAGACTGAGAACTTCTTTGAAAGTTCGCGCTCGAGACCGCTCACAGTCCATGCGACGTCGTA  
GTAACATCTCTTGTATGTTCCGATCGGGGAAACGAGAGTGGTGTGAGAGTACGCTCAATATCGAAGCTCATCTCTAC  
GGTGGGAGCAGAGCCCTCATCTCTCGCCAGTAGAGATATGCTTCCAAAACAAAGAGAATTCACAGCTCTGCTTTGAAA  
TTTCATAGTTCTTTCCAGCCTTTTCTTTGACAGAAATCCATCTGTGGAGTGCATGGAACGAAGGGTGAACAGTTTTGTG  
TACGTGTGATGTTTTGTTGCTGTTGCGAAGCTTTTCGATCGAAAGAGCCAAAGCCGCTATGCGATGCTGGCGAGT  
TTCCATCGCTCTCGCGACTCTCATCGCAGAAAGAGTTCGGAATTCAGCTTCAAACATCCACAGGAATTTTTCCCT  
TCAAGAACGACTTTTTTCTCTCGAAAGAGCGGGCGCTCCGCTTTTCGCGCAAACTCTCTCTGAAGATAATTCAAAC  
AGGAGACGTTGTTCTTTTTTCCCAAGAAATTCCTTCTTTTTGGGAAGTTGCATGTAGATGTATGGACAAAATCTTTC  
GATCGGGTGCAAAACGGTCTTCCATCTTCACTCTTCCATAGCAGTAAAGTTGAGACCTTCTTTGCGTCTGTCATG  
CCCATTGCCCCACCTTTGTAGTTGCAAAATCTATCCATGTCTTTTGTGTCAAAAGAAAGAGGAACTCTGAATTTGAA  
TCCATCTGTAATGAACCTTGAGAGCGTCTATCCAAGAAATCCGAGATCCGAGAAAGAGCGCTTCTCTGCTGTCGAGAAG  
CGTCTCCGAGAGACTCGCCATAGTTTGTATGTTTGGGCACCTGCCCCACAACCTTTTGTAGTTTTGTGTGTCAGAGTAC  
GAGAAAGAAATGTCAAAAACAATGGGAGAGTTTTAGCAAAAATTTTGGAAAGCGTCTCTGAACTTTTTTTCAGACACAGTGC  
GGTCTGTCTTCAAAAACAAGAAAGTTGGAGAGTTTTGGGTCTTTTGAACCTGCATCGCGCTTCTTTGATAGCTCGA  
GTTACCCAGAAATTTCAACAGAACTGCGAGCCTCAAAGACAAGGACAAACTCTTTTGGTCCATAAAGCTCCAGCAAA  
TACGGGGATATATTTTTGCAATCTCTGACAAGAAAGAGTCTTCTCAACTTTTGTTCGAAAAAAGGCAAGTTCTGGT  
CTCTTTCTCTATAAAAACGGCGACGTCAGAAAGAGTTCTGTTGGCTTTGCCAACTCGATGGAGAGTTTCTGTATTTTTCT  
GCTTGGCTTTCAAGCATTCAAGAAATAAACCGGAGAGTTTTTGGCGAACCGCTCTGATGTCTACTGTGCGGAGGACGAC  
ACAGAAAGCGCCAGCCTCTTTTGGACTTTTATGCTTGAAGAACCCTCTCTCATCCAAGATGCGAAAACGAAACGCCCTTGG  
AATGACGAGCATTGAGCATTTCGAGTTTTTGTGAGAGAAAGCAAGTTTGGCCAGACATTTGTGATAGTTGCGGCTTTA  
CGTTTTCTCTCTGTTTGTGGTCAAAGGAGTGGATAGAAAATTTTTGAAACATGTGCTGGACGCGTCCAATCCAAC  
GTTCCGCAAAAACTGCGCATTGACCTGGGCTCTTTTGGCAAGGGGACGAGGAACTGCTCTCTTGGTTGTTGAGAGAGG  
AGCCGACCCCTTGTGTCAGAGAGAACGTCAGGTGTTTTCGAAACAGAGAGTGAAGTGTGAGAGAGGCAAAAGAAATTT  
GGAAATGGACATCCAAAGCTCAAAAAGAAAGTCAAAAATAGCAAAAGGACGGACAGAGTTTTGTGTGAGACTTTA  
CAAGTCAAGAGCGAGAAATGTCTTTGGTGGCTGTCCAAACACTTCAAATCCGTCTCTGTTGCGGAAGCCGCAAAAAGAG  
GAACTCGGAAAGGAAGGAACTGTCCCTCTCGATGGAGGGGCTGAACTTTGGAGAGTTTTTTCAGACTTGCAAAATCTCT  
GGTTCCAAGAGGGAGACAAACGCCCGCTCTTCTTTCTCTCAAGTCCAAGGATTGTTGAGAAAGAAATCAGAGAGACCG  
AATCCAAGATACGACAAGATAGACTTTTTTGTCTCGCGCTGTGCTGTCACAACGATTTCCCTTTCATCAGCGATAAAGCT  
CTCGAATAAAAATATTTTTATAAAAATATTTATAAATGGTCTGTCTTGTCTCGAAAGAAAAAAGTCAAAAAGGCGAAG  
CAGAGGTGTCAAGCAAAAACAGCGAAAGGAAAGAGATGCAAGAACAGCGCTCTTCTGGGAAGAAATTTTTGTTGGACACA  
CAGAGACTTTTAAACGAGCCATCCATCGTCTGATCGTTTTGTGAGTGTCAAAGAACGCCCACTCCTGCTGGATTCCGTCT  
TTGAGCGATATCCAAGCTCTTTAGTCCATCCAAAATTTGGTCTTTGATGGATTGCGCTTCTCTCTTCCAACGTCAAAA  
ACTCGGATCGTAAAAGACTTCCCACTTTTGGGAGAGGATGTTGGTGTCTACGCCAAACTTGAACCTCGCACTCGGATTT  
TATCTTTGACAGACCAAAACAAGCGTCTTCCAAAAGCTTCTCGTTTTTTCGAGGCGACATCTCTCGAGGGTACTTGGAGT  
GAAACTCGAAATACTCCCAAGATGCAATTTTTTGGCATCTTCTTTCTGTTGGCAGGCACTCTTCTGTTGCAATGCAATCGT  
TCAACCTTTACAGAGCACAGAAAACCACTCTCTGAGAGGCTTTTGGCGATGGAGTTTGGCTTTTGTATCGCGACATC  
AGAGGTTCCAGAGCACTTGTCTCATCGCTGAGATGCGTATTTGCTGCTTCCCTTCCGCTGCAATGCGAAAGATTG  
CCTTGTAGTTTTTCTGTTTGCAGTAGAAGAGAAGGTCGACTACATCCAGGTTGTCTACGGTCACTGAAATCTCAAAGT  
CCCTGTAGTTTGCAGCTCATTTTTCTTCAAAGGCAAAAGAAAGCTCAAAAATTCGATTTATTAATGGAAGAGTTGGGCG  
CTCTTGTGTTGTAGAAAGAGCAATCTTCTTCTTCAAGAGGAGTCCATTTTTTCGATGAGAGGTTTGTCAAGAAA  
CTCAAGGACGAAGACTTTGACTCCAATGGCAACATCAAAAACAAAGGGTGTAGCTTCTGTTGGCTTCTACGCTCTTGGT  
CGGTACTGCAACAGCTTGCACAGAGTGGTCAAAATTCGACAGAGCGCGCGCTTTGTGGACGTGACTCTGTCAACT



CTGATGAAGAGAAACCTCTCATCGAAAGGTTGAAACAGAAAAGTCCAGATTTTGTGGTGGTTATCCCAATAAATCGCC  
TACAAAACAGGAGAGGCGTTCGAAACGTACGAAAGGAGAGAGGAGGCTGGAGCGTTTCTCAAGGAGGCGATGATGCTGTG  
CAATAGATAATTTTTCTTTTCAGAGAAAAGAAAACAAGAGAAAACAACATGAACAACAACCTTTGCCACGCTTTGAAAG  
AACAGGTCAGAAATCTTTCGGAGGACCTTTGCGAAGTGTTCAAAAGCGAACCAGAGAGAAGGCGGACGTCGCTTTGCTT  
CAGATGTTCTTCTGTGTTCCAGAGAAGAAAGCTGATGGAACATTTTGTCAAATTTGTCTTCTCACGCCGATAAAAAT  
TCACGCAAAGAACGAGAGGCTTCTTCATCAAAAACACCGACCTTTGGAGAGGGCTCCCGGAAGACAGGTTGAAAATGGTCT  
CTGAAATGTGGCTGACTGGAAGGTTGGACGCGAGACGATAAGCAGATGATGTGGGATTATTTCCAGTGTTTTGTGAACTT  
GCGAAAAGTTGGAGAAAACGCAATAAGCCAACTTCCAGATGCTGTAACAGAATGTCTGGAATGGTTCTTTTTATAGC  
AAGCGCTCTCCACATTTGAGGCAAAAGCTTCCACCTTTTTTGGAAATTCGTAATTCATACCGGTGTCATGGTTTGTGGTAG  
CCAGTCCATCCGTTCCATCATAAAAAATCTGGAATAACAAGATCCGAGGTGTGCCACTCTCTTTGTGATGAACGGGT  
CAAACTTTCCATCTTCGAAAGGAGAGAAAGTTTATAATTTGGCTCCTTACGCTGGTGAAGGGTGAAGAAAGGCCAGAACAG  
AATCCGGACCTCTTTTTGAGAAAACCGCGATAGGTGATGACGAAGGAGAAGAGGAAGAACTCTGTGTTCTCGGACC  
AAAACTTTGAGAAACCCCAACGCGAATCCATCAAGACAGAGCGCGGAGACTTCAAAGGAAGCGCAGAACCGCAATG  
GAATGAAGTACGAATAATTTTTCTTTCTCAACAAAAGAAAATATTTAGTTGGCAACGTTTGTGAAACGGAAGGTGAAC  
TCTCTGTTTATGTTTCGGCCCTTAGCTTGGGAGTTTCATAGGTTTGTATACCGAATCTGTCTCTGTCAGAAAGACGCT  
TTATAAGTTTGTGCCAAAAATCTCTTTTGAATGTCTGAGGTGAAGTCCAAAAATTCAGAGACGATGTTGTGCACAA  
TCTCTGGTTTCAATTTGAGGCAAAAGTTCCACCTTTTTTGGAAATTCGTTCAAGTGTGGTGTGAATGTCTGAAAGCGGAG  
CCACAACCTTTCTTTGCGTGTAGTGTTCGCGATCTCTGCGTGATAAGGTTCTGTAAGAATCGCATGTTTTCGATAGAA  
AAGAGCTGTCTGTGCAACACATCGGATAGATAGTGTAGGTTGTTGACTGCATCTTCAACTATGCTGACAAAACCTTTG  
CTTGGTGAAGTTGAAAAGTCTTTGGTCCGCGTCTCATCTAAGAAGCAACAAGTGAATCTTCCGTTTTGAGCATGT  
CATGCAAAACGAGAAAATGCTGTTTCGAAACACGACCGACCGCGCGGCTCTTTTTTCTGGACACGAAAGGGATGAAGAT  
ACACTCCAAACCCAAAGAACCCAGAACAAAACTCGTCTGTTGCACAAAGGTTCTGTTGACACAGCAACGACACAAG  
GTGTGTTCAAAGGAACGCACATCAACGGAGAAGAGTTCTTTCTCAAGGCGACGATGAAGGATGGAAGGTTCTTTGTCG  
AGGAAATAACGAAAATGACGATAAAAATATTTGCTGTAATATTTGAAAGGAGATGGAAGCCGTCGCTGTTGTTT  
GAGGAAGACGGGTTGCGACAAAAGCCGAACAAGTCTCATCGTCAAATTTTGAACGCTTAAGAATTTCAACCTGGG  
AGAAGACCTGATAAAAAGTTTCGAGAGTTTGGAGTATGTCCTGATGATGAACGGGTCATTTTACAGAGCGAGGAAGAG  
CGTTTGGCTTTTACCTCGAGTTGGAAGGAGGAGCTCGTCTCTCAAAAATGACCTTTGTGAAAAGGTCGAACTCGAC  
ACTGCAAAACGAGAAAATGCTGTTTCGAAACACGACCGACCGCGGATCAACCTTTCCCGGAACGGTCTTCCCAACGAGAT  
TGGGAAAAGTCTCTGAGGAGAAAAGGAAAGGTACAGATAGTTGTCAAATAAAAATTTTTCTTGAATAATTTTTAT  
GTTGCGTACGCAACAAGTCCGTAGATGACACTTGTGAAGCACCAGTAAGAGCTGAATCTCTCCCTCGAGTTTTCCACCA  
ACTGTAGAACGCGAGTGCAGCACCAGTTGCGATGAGAGGAATCCCTTTTTCTTTGCAAAAGTATAGGAGCAAAAAGT  
CAAAAGATAGAGAGGAGCGAGCCAGCCGGGATCAACCTTTCCCGGAACGGTCTTCCCAACGAGATGCCCTTCTCT  
CCGACGACAGTTCCGATCTTTCCAGAAGTTTGTGCGAGACCTATCATGAACAGCACAGCGTACATCGTCTGATTTTT  
GAGGAAAGGACTTCTCTGTCCTTCAACCTCCATAAGACTGGACGAGTGGCTGCAAAAGCAAGAGGCAATATCGTCT  
TTGTGAGCGCTTTGTTGAATGTTTCAGAGCCGAGTTCCACCACTCCAGCTTCGACAAGTTGTATGGTCGAAAACAC  
AGAAGAAAGAGAGGCTTCCATCTCGTAGATGCCGCTCTTTACCCACAAAAGAACCAAAAAGCAATGGAGAATGCCCA  
CGCGGAGAGAGAAGCTTCGAGAGAGAAGCACATCGTTAACAATAAAAATATAAAAAGTAAGATGAACACGGGCACGCTGC  
GTTGTTGGTGTGGCGTTGTTGTTGCTTTTTGTTGTTGATGTTGAAAAAAGAACCCAGCAAAAGAGGCGAGATTTAAAG  
GTTTCGAGTTTTTACTGGACCGAGCACACTAGAAATCCAAACTCTGCTGTAACGACATCCACAGAAAAGAGTGTCTTCT  
GTTTGCAAAAGCTGTGCCCTTGGCAACCGCTACAGTTTCGACCCGACCACAAAAGGTGTGTGAGCCGTTTATTGTAAGAAA  
AACTTTACAGTACGAGAGGACGACAGGAAGAACTCGATGTTTGTGACTGTGTGTGCTAACATAAAAATTTTTATATA  
AATATTTTTATTCGGGACGGGTCGATCCCATCTTTTTCTCTCTCTGTTGAGAGAGCAAGCCACTTGTGAGAGTAGT  
CAGAGTTCTTCCATCGAGCTCGGCGATCTCGTCACTCGAGTTTGTGCGAGACTTCTCATCACTTCGATCCGTTCAAGA  
TATTCGTGATGTACTGCTCCACCTGTCTCCGAGCCACCGCTTCTTTGTGTAATATTCGAGGTTGGTTGGTTCGTCATC  
GAGAGCTCTTTCATGAAGAGCGGTTTTCTTTCTCTCTTCGAGTTACGAGCAAACTTTTTATCTTCTCAATGTTTGTCT  
GGATGACTCTATCTGAAGTTCTTTTGAATCTGCTCGAGGTTTTCGATGGCCACATCTCCACCTTCGCCGCGAGT  
TCGGTGTGAGAGTGAAGGGCAAAAGAGTTCCGACCTGTGCGCGAAAATGGGGGCTGTCGAATCGTGTCTTGAATAAT  
CTTCATCGCGAGCGCTCCGCGAGTTCCGCGATCGGGCATAACCGCAACCGCAACCGTGGATTCCGTTCAACCG  
GTTTTTCGAGAGGGTAGAAAACAGGTTGACAACAGCTGTCCAGGATGGGAGGTTGCTTCAACCCACGGGAAACA  
GAGGAAAAGGATTTGTAAGAGCCTCTGTGGCGGACGAGTTTCTCGTCCGTGAGCGGAGGCGCCTTGGGGTCAACGAA  
AGCTCGGATCATTGTTTGTCTTACCCTTCTGGAGGGAGAGCGTTTATCTCGAAATTCAAAAGAGAAATTTGGAATGTTT  
CACAGAGTGTACCGAAGTCTTCCACCGAGGCGTTGCGACACCTCGAGAACTTTTCATCGCAGTCTCGTGTTTTCAT  
AGTGTTTTTGAGGAAGCAAAAGTCTGCTGGGTTTGGGACGTAATGAGATGCTGAAGCAACTTGTACAGCACATACCACG  
CATTGAGAGATTTTTCTCTCTTTTTCTTTTATTTGAGATAAACTTTTTATACAGCTATAACAGTTTTGAAAGTCC  
TCTTGATATGCGCTGATGCTGGGGGAAGCGTCCCATTTAGGTTCCAAAAGCAAAAGAGAAAGTTCTCGTAATAGTCTGT  
GAGATGTTTGTCCACAAGAACATATAGATATGTTCTTTGTTACGTTCTCGAGGGTATGTCGATTTTTTGTGTTCCG  
ACTTATCTTCGCCTTCACTCAAACGGTATTCTCGTGTTTTTCTTTGCTGGAACCTTCTCAATGACTTCAAGGAACTGG  
AGTTTTGGTGACATACTCTGGCTTACTGGAACCAAGTTTCTCTGAGAGTCTTTGATGAGAAAGCCTTCCACAACATG  
GAAAATTTGCGCGCACACGCGCATATGAGCTTTTCTTTTCAAACCTCTGGGAGAGCTCTGCGTTACATGTCCGGC  
AGCGGACACGCGAAGAGCTCTGTGTCGACCTCGATGATGTTTCTCGCATCTTTAAAAATTCGTTCAACAACCTTCA  
TCAGCGTCTGTTCTTTGGCCTGCTACCAAGAAGCTAATTTTTGAACTTTCCAAATCTCTTGATACCTTTGAG  
AAGAGGAGCAAAAAGAGCAGAAATTTCTCATCTGCAAGAGAGTGTGCTTCCAGAGATTTCTTCCGAGAGTGTACG  
CCCTCTCTTTGCTCTCGAAACGCTCTCCCTGTTGGACTGTTGAAATAGATGAATTCGACCTGTGCGACTTTTTCT  
TTTTTTGAGATGGTGTGAGTCTCTGAGCAAACTCTGTTTTTATTTTTTCATCAAGTCCAGGAACGTCAGCTGGGTCT  
TACAGGCTGTGCTTTTCGCTGGTTAAGCCATAAGAGAATGAGCTTTTCGTACGAAAGCTCATGTTTTCTCTGAAAGAT  
TTTTTTTGAATTTTTTTTGTATGTTTGAAGTA
